# Supplementary material for: A Lactococcal Phage Protein Promotes Viral Propagation and Alters the Host Proteomic Response During Infection
Source: Viruses. 2020 Jul 24;12(8):797. doi: 10.3390/v12080797 (PMC7472136; doi:10.3390/v12080797)
Supplement: Supplementary file 1 [file viruses-12-00797-s001.zip]

Archive with 7 entries (7 files):
- SupplementaryFigureS5.png
- SupplementaryFigureS6.png
- SupplementaryFigureS7.png
- SuppMat.pdf
- SuppTables.xlsx
- SupplementaryFigureS2.png
- SupplementaryFigureS3.png
