# Supplementary material for: A Lactococcal Phage Protein Promotes Viral Propagation and Alters the Host Proteomic Response During Infection
Source: Viruses. 2020 Jul 24;12(8):797. doi: 10.3390/v12080797 (PMC7472136; doi:10.3390/v12080797)
Supplement: Supplementary file 1 [file viruses-12-00797-s001.zip › SuppTables.xlsx]

## Sheet: Table S1
Table S1. Bacterial strains, phages and plasmids used in this study.
Bacterial strains, phages and plasmids	Characteristicsa	Source
Bacteria
E. coli NEB5a	Competent cells, cloning	NEB
L. lactis MG1363	Host of phage p2, GenBank NC_009004.1	Gasson31
L. lactis MG∆0676	Derivative of L. lactis MG1363, deletion of 268 bp in gene llmg_0676	This study
Phages
p2	Virulent phage, host MG1363, GenBank GQ979703	Higgins et al.32
p2∆47	Derivative of phage p2, deletion of 76 bp in the gene orf47	Lemay et al.13
Plasmids
pNZ123	High copy number vector, Cmr, 2.5 kb	de Vos33
pL2Cas9	Low copy number vector with CRISPR-Cas9 from S. pyogenes, Emr, 12.2 kb	Lemay et al.13
		(Addgene # 98841)
pL2Cas9-0676	pL2Cas9 with a spacer targeting the gene llmg_0676 in L. lactis MG1363, 12.2 kb	This study
pHis47G86Cb	pNZ123 encoding ORF47 with a N-terminal polyhistitine-tag and the mutation p.Gly29Ala, 3.3 kb	Lemay et al.13
pNZ0677	Expression vector with a pNZ123 backbone for the expression of gene llmg_0677, 3.1 kb	This study
pKO0676	Repair template with a pNZ123 backbone for the knockout of llmg_0676, 3.7 kb	This study
a Cmr is chloramphenicol resistance and Emr is erythromycin resistance.
b Plasmid pHis47G86C was previously constructed to introduce an 18 bp sequence corresponding to a polyhistidine-tag at the N-terminus of ORF47. The point mutation G86C in gene orf47 was introduced to select recombinant phages and to prevent cleavage by SpCas9.

## Sheet: Table S2
Table S2. Primers and oligonucleotides used in this study.
Names	Function	5’ to 3’ sequencea
BIM47_Compl_pNZ_F	Construction of pNZ0677	ATTACAGCTCCAGATCCAGTACTGAATTCTCAAATCATATTTCTGCATCACG
BIM47_Compl_pNZ_R		GAAAATATGCACTCGAGAAGCTTGAGCTCTGAAGCCTTTTATAATTCAAAACG
pNZKO0676_F	Construction of pKO0676	ATTACAGCTCCAGATCCAGTACTGAATTCTCATCAAACAGATAAGTCCAATTCAC
pNZKO0676_R		GAAAATATGCACTCGAGAAGCTTGAGCTCTGAACAACAAAAAGTCCAATGATACG
KO0676_F		CCAGCTTAACAAACGGTTATCAAATCATATTTCTGCATCACG
KO0676_R		CAGAAATATGATTTGATAACCGTTTGTTAAGCTGGGCAATTG
pNZins_F	Screening inserts in pNZ123	CGCTAAAACGTCTCAGAAAC
pNZins_R		GTGATGGTTATCATGCAGGATTG
SP_0676	Cloning new spacer in pL2Cas9	AAACCATTTCATCTGATGTAATTAACTTTTTTAGG
SP_0676_RC		AAAACCTAAAAAAGTTAATTACATCAGATGAAATG
Cas9_F6	Sequencing crRNA	GTTCTTAGTGCATATAACAAACATAGAGAC
crRNA_R		CCAAGTAGCGAAGCGAGC
MGdel_0676_F	Screening deletion in llmg_0676	CAATTGCCCAGCTTAACAAACG
llmg0679_R		CAATAAAATCATAAACTATTGGAAATGCAAGG
MGdel_0676_F2		CCAATGGCTACACAGGTTCG
MGdel_0676_R2		CGTGATGCAGAAATATGATTTGATAAC
a Overhangs for Gibson assembly and restriction sites for ligation are underlined.

## Sheet: Tables S3
Table S3. L. lactis MG1363 and phage p2∆47 protein identifications.
Protein IDs	Majority protein IDs	Unique peptides t0_A	Unique peptides t0_B	Unique peptides t0_C	Unique peptides t10_A	Unique peptides t10_B	Unique peptides t10_C	Unique peptides t20_A	Unique peptides t20_B	Unique peptides t20_C	Unique peptides t40_A	Unique peptides t40_B	Unique peptides t40_C	Peptides	Razor + unique peptides	Unique peptides	Sequence coverage [%]	Unique + razor sequence coverage [%]	Unique sequence coverage [%]	Mol. weight [kDa]	Q-value	Score	Intensity	MS/MS count	LFQ intensity t0_A	LFQ intensity t0_B	LFQ intensity t0_C	LFQ intensity t10_A	LFQ intensity t10_B	LFQ intensity t10_C	LFQ intensity t20_A	LFQ intensity t20_B	LFQ intensity t20_C	LFQ intensity t40_A	LFQ intensity t40_B	LFQ intensity t40_C	Protein IDs	Majority protein IDs
sp|A2RH74|DNAA_LACLM	sp|A2RH74|DNAA_LACLM	27	25	21	17	17	18	19	18	17	14	16	14	31	31	31	70.9	70.9	70.9	51.316	0	323.31	1338100000	423	41501000	35706000	47860000	40815000	46208000	50312000	54620000	53452000	54439000	55494000	52662000	45846000	sp|A2RH74|DNAA_LACLMChromosomalreplicationinitiatorproteinDnaAOS=Lactococcuslactissubsp.cremoris(strainMG1363)GN=dnaAPE=3SV=1	sp|A2RH74|DNAA_LACLMChromosomalreplicationinitiatorproteinDnaAOS=Lactococcuslactissubsp.cremoris(strainMG1363)GN=dnaAPE=3SV=1
sp|A2RH76|ADDB_LACLM	sp|A2RH76|ADDB_LACLM	16	18	13	29	21	23	31	24	26	28	27	29	42	42	42	45.5	45.5	45.5	127.23	0	323.31	184200000	417	38759000	35368000	31686000	32470000	34006000	48509000	42605000	31895000	37564000	41701000	28811000	32222000	sp|A2RH76|ADDB_LACLMATP-dependenthelicase/deoxyribonucleasesubunitBOS=Lactococcuslactissubsp.cremoris(strainMG1363)GN=rexBPE=1SV=1	sp|A2RH76|ADDB_LACLMATP-dependenthelicase/deoxyribonucleasesubunitBOS=Lactococcuslactissubsp.cremoris(strainMG1363)GN=rexBPE=1SV=1
sp|A2RH77|ADDA_LACLM	sp|A2RH77|ADDA_LACLM	20	20	18	24	23	26	29	24	31	30	25	25	55	55	55	49.8	49.8	49.8	138.94	0	323.31	209020000	451	33387000	30304000	25688000	20930000	33648000	28437000	31243000	29439000	26924000	30879000	28335000	26019000	sp|A2RH77|ADDA_LACLMATP-dependenthelicase/nucleasesubunitAOS=Lactococcuslactissubsp.cremoris(strainMG1363)GN=addAPE=1SV=1	sp|A2RH77|ADDA_LACLMATP-dependenthelicase/nucleasesubunitAOS=Lactococcuslactissubsp.cremoris(strainMG1363)GN=addAPE=1SV=1
sp|A2RH85|PTH_LACLM	sp|A2RH85|PTH_LACLM	6	5	6	7	7	2	7	6	5	7	4	8	13	13	13	73.4	73.4	73.4	20.963	0	47.619	100990000	200	9177300	6255200	6853600	12699000	13410000	9008500	16326000	10546000	12752000	7456600	5161000	10367000	sp|A2RH85|PTH_LACLMPeptidyl-tRNAhydrolaseOS=Lactococcuslactissubsp.cremoris(strainMG1363)GN=pthPE=3SV=1	sp|A2RH85|PTH_LACLMPeptidyl-tRNAhydrolaseOS=Lactococcuslactissubsp.cremoris(strainMG1363)GN=pthPE=3SV=1
sp|A2RHD8|RECO_LACLM	sp|A2RHD8|RECO_LACLM	0	0	1	3	2	2	2	0	0	1	2	3	5	5	5	25.1	25.1	25.1	28.702	0	3.2819	6922000	13	0	0	0	2868600	6071500	2813600	0	0	0	0	3115100	6534900	sp|A2RHD8|RECO_LACLMDNArepairproteinRecOOS=Lactococcuslactissubsp.cremoris(strainMG1363)GN=recOPE=3SV=1	sp|A2RHD8|RECO_LACLMDNArepairproteinRecOOS=Lactococcuslactissubsp.cremoris(strainMG1363)GN=recOPE=3SV=1
sp|A2RHF3|PLSX_LACLM	sp|A2RHF3|PLSX_LACLM	13	13	12	10	9	12	10	12	10	10	9	9	15	15	15	58.9	58.9	58.9	34.749	0	224.24	530020000	427	35702000	28125000	48084000	45683000	46928000	43770000	59434000	35852000	31200000	61228000	23991000	60173000	sp|A2RHF3|PLSX_LACLMPhosphateacyltransferaseOS=Lactococcuslactissubsp.cremoris(strainMG1363)GN=plsXPE=3SV=1	sp|A2RHF3|PLSX_LACLMPhosphateacyltransferaseOS=Lactococcuslactissubsp.cremoris(strainMG1363)GN=plsXPE=3SV=1
sp|A2RHG9|RL331_LACLM	sp|A2RHG9|RL331_LACLM	5	3	6	6	5	5	6	7	5	4	4	3	7	7	7	77.6	77.6	77.6	5.997	0	50.878	1015400000	1974	145380000	305560000	191020000	73540000	45962000	144660000	97122000	123330000	191500000	98294000	211780000	175960000	sp|A2RHG9|RL331_LACLM50SribosomalproteinL331OS=Lactococcuslactissubsp.cremoris(strainMG1363)GN=rpmG1PE=3SV=1	sp|A2RHG9|RL331_LACLM50SribosomalproteinL331OS=Lactococcuslactissubsp.cremoris(strainMG1363)GN=rpmG1PE=3SV=1
sp|A2RHH0|RL32_LACLM	sp|A2RHH0|RL32_LACLM	2	1	2	1	1	1	1	1	1	1	1	1	2	2	2	40.4	40.4	40.4	6.6625	0	45.347	984140000	1022	155810000	16191000	70066000	264340000	182130000	603780000	444710000	164800000	224680000	353300000	228220000	224550000	sp|A2RHH0|RL32_LACLM50SribosomalproteinL32OS=Lactococcuslactissubsp.cremoris(strainMG1363)GN=rpmFPE=3SV=1	sp|A2RHH0|RL32_LACLM50SribosomalproteinL32OS=Lactococcuslactissubsp.cremoris(strainMG1363)GN=rpmFPE=3SV=1
sp|A2RHI1|PRMA_LACLM	sp|A2RHI1|PRMA_LACLM	3	7	5	4	5	3	4	4	3	2	3	2	8	8	8	35.3	35.3	35.3	34.818	0	13.605	100130000	67	9642500	7572000	8053200	7443400	8427300	5171100	6355800	7230600	6263000	5729900	8045400	5553000	sp|A2RHI1|PRMA_LACLMRibosomalproteinL11methyltransferaseOS=Lactococcuslactissubsp.cremoris(strainMG1363)GN=prmAPE=3SV=1	sp|A2RHI1|PRMA_LACLMRibosomalproteinL11methyltransferaseOS=Lactococcuslactissubsp.cremoris(strainMG1363)GN=prmAPE=3SV=1
sp|A2RHI6|DTD_LACLM	sp|A2RHI6|DTD_LACLM	2	2	3	2	2	1	2	2	2	3	3	2	3	3	3	19.2	19.2	19.2	16.633	0	45.115	47574000	66	6848600	4207400	5531600	4401800	7083500	0	3197700	8743300	7750600	5105100	3865000	4452300	sp|A2RHI6|DTD_LACLMD-aminoacyl-tRNAdeacylaseOS=Lactococcuslactissubsp.cremoris(strainMG1363)GN=dtdPE=3SV=1	sp|A2RHI6|DTD_LACLMD-aminoacyl-tRNAdeacylaseOS=Lactococcuslactissubsp.cremoris(strainMG1363)GN=dtdPE=3SV=1
sp|A2RHJ5|SECA_LACLM	sp|A2RHJ5|SECA_LACLM	43	47	40	44	44	41	48	40	45	45	45	42	56	56	56	70.9	70.9	70.9	98.005	0	323.31	6289400000	3939	874070000	859150000	808420000	873840000	961120000	738110000	834600000	804170000	737520000	504690000	784910000	571050000	sp|A2RHJ5|SECA_LACLMProteintranslocasesubunitSecAOS=Lactococcuslactissubsp.cremoris(strainMG1363)GN=secAPE=3SV=1	sp|A2RHJ5|SECA_LACLMProteintranslocasesubunitSecAOS=Lactococcuslactissubsp.cremoris(strainMG1363)GN=secAPE=3SV=1
sp|A2RHJ9|Y128_LACLM	sp|A2RHJ9|Y128_LACLM	3	3	3	3	3	3	3	3	3	3	3	3	3	3	3	65.7	65.7	65.7	11.094	0	232.14	186640000	441	15028000	11671000	20237000	29560000	21396000	45273000	19661000	38513000	29220000	12606000	19665000	22756000	sp|A2RHJ9|Y128_LACLMNucleoid-associatedproteinllmg_0128OS=Lactococcuslactissubsp.cremoris(strainMG1363)GN=llmg_0128PE=3SV=1	sp|A2RHJ9|Y128_LACLMNucleoid-associatedproteinllmg_0128OS=Lactococcuslactissubsp.cremoris(strainMG1363)GN=llmg_0128PE=3SV=1
sp|A2RHL0|ARLY_LACLM	sp|A2RHL0|ARLY_LACLM	24	26	20	29	25	27	24	27	28	21	25	23	33	33	33	64.1	64.1	64.1	51.866	0	323.31	7436000000	1547	304600000	313770000	388700000	1020400000	1025100000	1501000000	1314200000	912780000	1036700000	1184500000	1068400000	844190000	sp|A2RHL0|ARLY_LACLMArgininosuccinatelyaseOS=Lactococcuslactissubsp.cremoris(strainMG1363)GN=argHPE=3SV=1	sp|A2RHL0|ARLY_LACLMArgininosuccinatelyaseOS=Lactococcuslactissubsp.cremoris(strainMG1363)GN=argHPE=3SV=1
sp|A2RHL3|RNPA_LACLM	sp|A2RHL3|RNPA_LACLM	3	3	3	6	6	4	4	4	4	3	3	4	7	7	7	41	41	41	13.688	0	27.275	26402000	100	0	3951700	0	9052700	10396000	8932100	10633000	10125000	8526300	8906700	5847500	8105400	sp|A2RHL3|RNPA_LACLMRibonucleasePproteincomponentOS=Lactococcuslactissubsp.cremoris(strainMG1363)GN=rnpAPE=3SV=1	sp|A2RHL3|RNPA_LACLMRibonucleasePproteincomponentOS=Lactococcuslactissubsp.cremoris(strainMG1363)GN=rnpAPE=3SV=1
sp|A2RHM1|Y150_LACLM	sp|A2RHM1|Y150_LACLM	2	0	1	1	2	2	0	0	1	1	1	1	2	2	2	27.3	27.3	27.3	10.169	0	72.638	63916000	14	16891000	0	14697000	0	5849000	6602000	0	0	0	15331000	0	13664000	sp|A2RHM1|Y150_LACLMUPF0297proteinllmg_0150OS=Lactococcuslactissubsp.cremoris(strainMG1363)GN=llmg_0150PE=3SV=1	sp|A2RHM1|Y150_LACLMUPF0297proteinllmg_0150OS=Lactococcuslactissubsp.cremoris(strainMG1363)GN=llmg_0150PE=3SV=1
sp|A2RHM2|RUVX_LACLM	sp|A2RHM2|RUVX_LACLM	3	4	3	9	7	6	6	6	6	6	7	6	10	10	10	60.1	60.1	60.1	15.652	0	85.93	117450000	212	6170500	10010000	13509000	56011000	42393000	47090000	30936000	34197000	35683000	68569000	57423000	34851000	sp|A2RHM2|RUVX_LACLMPutativeHollidayjunctionresolvaseOS=Lactococcuslactissubsp.cremoris(strainMG1363)GN=llmg_0151PE=3SV=1	sp|A2RHM2|RUVX_LACLMPutativeHollidayjunctionresolvaseOS=Lactococcuslactissubsp.cremoris(strainMG1363)GN=llmg_0151PE=3SV=1
sp|A2RHN5|TGT_LACLM	sp|A2RHN5|TGT_LACLM	11	12	10	9	10	11	11	13	11	9	9	9	14	14	14	45.3	45.3	45.3	43.37	0	107.01	396440000	321	22977000	29948000	35871000	22390000	30650000	51594000	46016000	27855000	28703000	29020000	18924000	26698000	sp|A2RHN5|TGT_LACLMQueuinetRNA-ribosyltransferaseOS=Lactococcuslactissubsp.cremoris(strainMG1363)GN=tgtPE=3SV=1	sp|A2RHN5|TGT_LACLMQueuinetRNA-ribosyltransferaseOS=Lactococcuslactissubsp.cremoris(strainMG1363)GN=tgtPE=3SV=1
sp|A2RHP2|CODY_LACLM	sp|A2RHP2|CODY_LACLM	21	20	22	22	21	20	22	22	21	20	19	21	24	24	24	80.2	80.2	80.2	29.158	0	323.31	13465000000	2479	1039400000	599860000	1109000000	2133900000	1451000000	1480600000	1963400000	1090600000	1343100000	1009600000	1680500000	1324800000	sp|A2RHP2|CODY_LACLMGTP-sensingtranscriptionalpleiotropicrepressorCodYOS=Lactococcuslactissubsp.cremoris(strainMG1363)GN=codYPE=3SV=1	sp|A2RHP2|CODY_LACLMGTP-sensingtranscriptionalpleiotropicrepressorCodYOS=Lactococcuslactissubsp.cremoris(strainMG1363)GN=codYPE=3SV=1
sp|A2RHP4|GATC_LACLM	sp|A2RHP4|GATC_LACLM	8	4	6	4	3	4	4	4	5	6	7	4	11	11	11	93.1	93.1	93.1	11.228	0	43.309	302500000	292	93169000	49409000	66575000	14306000	10002000	31845000	5310100	16774000	16402000	8975900	26831000	19548000	sp|A2RHP4|GATC_LACLMAspartyl/glutamyl-tRNA(Asn/Gln)amidotransferasesubunitCOS=Lactococcuslactissubsp.cremoris(strainMG1363)GN=gatCPE=3SV=1	sp|A2RHP4|GATC_LACLMAspartyl/glutamyl-tRNA(Asn/Gln)amidotransferasesubunitCOS=Lactococcuslactissubsp.cremoris(strainMG1363)GN=gatCPE=3SV=1
sp|A2RHP5|GATA_LACLM	sp|A2RHP5|GATA_LACLM	30	30	27	24	21	23	25	25	25	20	23	20	31	31	31	63	63	63	52.142	0	323.31	4936600000	1174	155380000	147700000	168610000	181660000	202670000	185140000	173190000	182250000	189370000	177750000	178510000	209850000	sp|A2RHP5|GATA_LACLMGlutamyl-tRNA(Gln)amidotransferasesubunitAOS=Lactococcuslactissubsp.cremoris(strainMG1363)GN=gatAPE=3SV=1	sp|A2RHP5|GATA_LACLMGlutamyl-tRNA(Gln)amidotransferasesubunitAOS=Lactococcuslactissubsp.cremoris(strainMG1363)GN=gatAPE=3SV=1
sp|A2RHP6|GATB_LACLM	sp|A2RHP6|GATB_LACLM	40	41	40	33	32	30	29	30	28	24	30	26	44	44	44	78.2	78.2	78.2	53.34	0	323.31	8695600000	1086	288360000	275750000	309030000	230280000	259540000	181850000	234230000	221640000	197180000	247940000	260070000	279040000	sp|A2RHP6|GATB_LACLMAspartyl/glutamyl-tRNA(Asn/Gln)amidotransferasesubunitBOS=Lactococcuslactissubsp.cremoris(strainMG1363)GN=gatBPE=3SV=1	sp|A2RHP6|GATB_LACLMAspartyl/glutamyl-tRNA(Asn/Gln)amidotransferasesubunitBOS=Lactococcuslactissubsp.cremoris(strainMG1363)GN=gatBPE=3SV=1
sp|A2RHR3|RLMN_LACLM	sp|A2RHR3|RLMN_LACLM	10	11	7	9	8	11	9	12	12	7	11	7	15	15	15	41.6	41.6	41.6	41.658	0	156.25	197820000	245	9832700	53995000	23418000	43322000	30431000	47129000	45108000	51769000	46696000	29214000	42444000	22954000	sp|A2RHR3|RLMN_LACLMProbabledual-specificityRNAmethyltransferaseRlmNOS=Lactococcuslactissubsp.cremoris(strainMG1363)GN=rlmNPE=3SV=1	sp|A2RHR3|RLMN_LACLMProbabledual-specificityRNAmethyltransferaseRlmNOS=Lactococcuslactissubsp.cremoris(strainMG1363)GN=rlmNPE=3SV=1
sp|A2RHS0|MSRB_LACLM	sp|A2RHS0|MSRB_LACLM	2	4	3	3	4	4	6	5	6	6	5	5	8	8	8	69.7	69.7	69.7	16.3	0	154.22	119500000	98	0	20056000	22160000	18479000	13630000	22772000	22909000	16550000	14900000	21360000	14577000	8821200	sp|A2RHS0|MSRB_LACLMPeptidemethioninesulfoxidereductaseMsrBOS=Lactococcuslactissubsp.cremoris(strainMG1363)GN=msrBPE=3SV=1	sp|A2RHS0|MSRB_LACLMPeptidemethioninesulfoxidereductaseMsrBOS=Lactococcuslactissubsp.cremoris(strainMG1363)GN=msrBPE=3SV=1
sp|A2RHS3|RL28_LACLM	sp|A2RHS3|RL28_LACLM	9	6	9	8	5	7	4	8	6	8	7	7	14	14	14	98.4	98.4	98.4	7.1733	0	63.465	1232100000	1089	274380000	136500000	332940000	60037000	32263000	118020000	38044000	79069000	112760000	54081000	92769000	64990000	sp|A2RHS3|RL28_LACLM50SribosomalproteinL28OS=Lactococcuslactissubsp.cremoris(strainMG1363)GN=rpmBPE=3SV=1	sp|A2RHS3|RL28_LACLM50SribosomalproteinL28OS=Lactococcuslactissubsp.cremoris(strainMG1363)GN=rpmBPE=3SV=1
sp|A2RHW0|Y241_LACLM	sp|A2RHW0|Y241_LACLM	3	4	2	3	2	2	1	1	2	1	2	2	7	7	7	20.3	20.3	20.3	42.853	0	6.1533	83015000	16	0	0	0	733520	494020	414530	0	0	718470	0	502150	1274200	sp|A2RHW0|Y241_LACLMUPF0348proteinllmg_0241OS=Lactococcuslactissubsp.cremoris(strainMG1363)GN=llmg_0241PE=3SV=1	sp|A2RHW0|Y241_LACLMUPF0348proteinllmg_0241OS=Lactococcuslactissubsp.cremoris(strainMG1363)GN=llmg_0241PE=3SV=1
sp|A2RHW1|Y242_LACLM	sp|A2RHW1|Y242_LACLM	8	8	9	7	6	7	7	6	7	8	5	7	10	10	10	46.2	46.2	46.2	25.752	0	170.3	1135300000	963	132680000	94014000	210440000	87690000	141770000	264120000	226040000	149700000	133320000	123780000	105780000	128530000	sp|A2RHW1|Y242_LACLMProbabletranscriptionalregulatoryproteinllmg_0242OS=Lactococcuslactissubsp.cremoris(strainMG1363)GN=llmg_0242PE=3SV=1	sp|A2RHW1|Y242_LACLMProbabletranscriptionalregulatoryproteinllmg_0242OS=Lactococcuslactissubsp.cremoris(strainMG1363)GN=llmg_0242PE=3SV=1
sp|A2RHW2|UNG_LACLM	sp|A2RHW2|UNG_LACLM	6	1	5	4	4	2	9	10	10	5	3	8	11	11	11	58.9	58.9	58.9	24.598	0	243.26	48923000	114	4688900	0	5544300	7001000	5202200	1914200	9998900	9444000	11546000	6631800	1117400	7627500	sp|A2RHW2|UNG_LACLMUracil-DNAglycosylaseOS=Lactococcuslactissubsp.cremoris(strainMG1363)GN=ungPE=3SV=1	sp|A2RHW2|UNG_LACLMUracil-DNAglycosylaseOS=Lactococcuslactissubsp.cremoris(strainMG1363)GN=ungPE=3SV=1
sp|A2RHW9|RS21_LACLM	sp|A2RHW9|RS21_LACLM	7	2	5	5	5	5	6	5	3	5	5	3	8	8	8	56.9	56.9	56.9	7.0181	0	48.811	221510000	392	37919000	0	31963000	56938000	40430000	24761000	17152000	41123000	84717000	63607000	73746000	178740000	sp|A2RHW9|RS21_LACLM30SribosomalproteinS21OS=Lactococcuslactissubsp.cremoris(strainMG1363)GN=rpsUPE=3SV=1	sp|A2RHW9|RS21_LACLM30SribosomalproteinS21OS=Lactococcuslactissubsp.cremoris(strainMG1363)GN=rpsUPE=3SV=1
sp|A2RHX1|PGK_LACLM	sp|A2RHX1|PGK_LACLM	46	39	37	38	38	38	39	39	35	35	35	34	51	51	51	96.7	96.7	96.7	42.107	0	323.31	42132000000	10471	4129400000	3955400000	4125500000	3180400000	4721000000	4375300000	3974400000	3489600000	3351200000	3179400000	4341000000	3006700000	sp|A2RHX1|PGK_LACLMPhosphoglyceratekinaseOS=Lactococcuslactissubsp.cremoris(strainMG1363)GN=pgkPE=3SV=1	sp|A2RHX1|PGK_LACLMPhosphoglyceratekinaseOS=Lactococcuslactissubsp.cremoris(strainMG1363)GN=pgkPE=3SV=1
sp|A2RHY8|LUXS_LACLM	sp|A2RHY8|LUXS_LACLM	9	11	10	10	8	8	8	9	10	8	9	8	11	11	11	52.5	52.5	52.5	17.605	0	287.95	3413900000	1635	490740000	459220000	477780000	375540000	209230000	286760000	404400000	407220000	287380000	200700000	187110000	147490000	sp|A2RHY8|LUXS_LACLMS-ribosylhomocysteinelyaseOS=Lactococcuslactissubsp.cremoris(strainMG1363)GN=luxSPE=3SV=1	sp|A2RHY8|LUXS_LACLMS-ribosylhomocysteinelyaseOS=Lactococcuslactissubsp.cremoris(strainMG1363)GN=luxSPE=3SV=1
sp|A2RHZ5|ACMA_LACLM	sp|A2RHZ5|ACMA_LACLM	16	17	14	8	5	6	7	10	9	2	6	5	17	17	17	58.4	58.4	58.4	46.563	0	296.41	408030000	182	12174000	10730000	16553000	5711200	3223200	4439700	6566100	11243000	12939000	2483500	5202800	2696700	sp|A2RHZ5|ACMA_LACLMProbableN-acetylmuramidaseOS=Lactococcuslactissubsp.cremoris(strainMG1363)GN=acmAPE=3SV=1	sp|A2RHZ5|ACMA_LACLMProbableN-acetylmuramidaseOS=Lactococcuslactissubsp.cremoris(strainMG1363)GN=acmAPE=3SV=1
sp|A2RI01|ECFA1_LACLM	sp|A2RI01|ECFA1_LACLM	7	8	4	4	1	3	1	3	2	4	3	3	11	11	11	38.3	38.3	38.3	30.931	0	146.3	304920000	34	15012000	33604000	23722000	31508000	0	29502000	0	14721000	12947000	18437000	22352000	13194000	sp|A2RI01|ECFA1_LACLMEnergy-couplingfactortransporterATP-bindingproteinEcfA1OS=Lactococcuslactissubsp.cremoris(strainMG1363)GN=ecfA1PE=1SV=1	sp|A2RI01|ECFA1_LACLMEnergy-couplingfactortransporterATP-bindingproteinEcfA1OS=Lactococcuslactissubsp.cremoris(strainMG1363)GN=ecfA1PE=1SV=1
sp|A2RI02|ECFA2_LACLM	sp|A2RI02|ECFA2_LACLM	10	11	12	7	3	9	9	8	8	7	4	8	18	18	18	79.9	79.9	79.9	31.624	0	145.32	295410000	142	33026000	45052000	36489000	18431000	36544000	48224000	35628000	39255000	51303000	46065000	73897000	41289000	sp|A2RI02|ECFA2_LACLMEnergy-couplingfactortransporterATP-bindingproteinEcfA2OS=Lactococcuslactissubsp.cremoris(strainMG1363)GN=ecfA2PE=1SV=1	sp|A2RI02|ECFA2_LACLMEnergy-couplingfactortransporterATP-bindingproteinEcfA2OS=Lactococcuslactissubsp.cremoris(strainMG1363)GN=ecfA2PE=1SV=1
sp|A2RI03|ECFT_LACLM	sp|A2RI03|ECFT_LACLM	3	3	3	4	4	2	3	5	3	6	5	5	8	8	8	25.2	25.2	25.2	30.16	0	32.418	31092000	132	2869400	5517600	1978400	2921200	6490300	2496500	2484400	2203500	1943200	5077500	4823200	4199200	sp|A2RI03|ECFT_LACLMEnergy-couplingfactortransportertransmembraneproteinEcfTOS=Lactococcuslactissubsp.cremoris(strainMG1363)GN=ecfTPE=1SV=1	sp|A2RI03|ECFT_LACLMEnergy-couplingfactortransportertransmembraneproteinEcfTOS=Lactococcuslactissubsp.cremoris(strainMG1363)GN=ecfTPE=1SV=1
sp|A2RI05|DAPH_LACLM	sp|A2RI05|DAPH_LACLM	7	4	6	6	6	7	4	4	3	5	4	4	10	10	10	41.4	41.4	41.4	26.667	0	67.139	298880000	88	24715000	29036000	26530000	24014000	26949000	34229000	30663000	29012000	35015000	30348000	42521000	40940000	sp|A2RI05|DAPH_LACLM2,3,4,5-tetrahydropyridine-2,6-dicarboxylateN-acetyltransferaseOS=Lactococcuslactissubsp.cremoris(strainMG1363)GN=dapHPE=3SV=1	sp|A2RI05|DAPH_LACLM2,3,4,5-tetrahydropyridine-2,6-dicarboxylateN-acetyltransferaseOS=Lactococcuslactissubsp.cremoris(strainMG1363)GN=dapHPE=3SV=1
sp|A2RI06|DAPEL_LACLM	sp|A2RI06|DAPEL_LACLM	4	9	5	4	3	4	3	6	6	4	2	3	14	14	14	46	46	46	41.75	0	73.395	52598000	48	5956600	4815400	5853600	4809900	3950500	8756900	4204600	3633700	4943500	4658700	2940100	4979000	sp|A2RI06|DAPEL_LACLMN-acetyldiaminopimelatedeacetylaseOS=Lactococcuslactissubsp.cremoris(strainMG1363)GN=llmg_0292PE=3SV=1	sp|A2RI06|DAPEL_LACLMN-acetyldiaminopimelatedeacetylaseOS=Lactococcuslactissubsp.cremoris(strainMG1363)GN=llmg_0292PE=3SV=1
sp|A2RI10|RS4_LACLM	sp|A2RI10|RS4_LACLM	26	22	25	25	26	23	27	26	25	25	24	24	29	29	29	90.6	90.6	90.6	23.196	0	323.31	47377000000	9431	5027100000	2937900000	5565900000	5305000000	3479200000	3254300000	6185700000	4270600000	4049800000	3533100000	2778400000	5521800000	sp|A2RI10|RS4_LACLM30SribosomalproteinS4OS=Lactococcuslactissubsp.cremoris(strainMG1363)GN=rpsDPE=3SV=1	sp|A2RI10|RS4_LACLM30SribosomalproteinS4OS=Lactococcuslactissubsp.cremoris(strainMG1363)GN=rpsDPE=3SV=1
sp|A2RI17|Y304_LACLM	sp|A2RI17|Y304_LACLM	2	2	1	4	4	3	4	3	3	3	4	4	5	5	5	71.1	71.1	71.1	8.8278	0	45.77	71070000	155	17828000	36255000	0	70469000	20954000	16269000	16343000	18505000	30966000	20338000	25271000	15165000	sp|A2RI17|Y304_LACLMUPF0356proteinllmg_0304OS=Lactococcuslactissubsp.cremoris(strainMG1363)GN=llmg_0304PE=3SV=1	sp|A2RI17|Y304_LACLMUPF0356proteinllmg_0304OS=Lactococcuslactissubsp.cremoris(strainMG1363)GN=llmg_0304PE=3SV=1
sp|A2RI22|TSAD_LACLM	sp|A2RI22|TSAD_LACLM	7	10	8	10	8	9	9	10	7	7	8	8	13	13	13	44	44	44	36.71	0	83.596	124950000	193	8319100	9654200	14517000	19442000	19582000	17794000	16567000	14227000	15547000	19236000	15573000	17598000	sp|A2RI22|TSAD_LACLMtRNAN6-adenosinethreonylcarbamoyltransferaseOS=Lactococcuslactissubsp.cremoris(strainMG1363)GN=tsaDPE=3SV=1	sp|A2RI22|TSAD_LACLMtRNAN6-adenosinethreonylcarbamoyltransferaseOS=Lactococcuslactissubsp.cremoris(strainMG1363)GN=tsaDPE=3SV=1
sp|A2RI32|AMPN_LACLM	sp|A2RI32|AMPN_LACLM	38	42	38	41	46	45	44	41	44	41	42	41	54	54	54	65	65	65	95.368	0	323.31	5628500000	3872	854390000	777110000	951270000	985910000	1235200000	913170000	1078900000	1047700000	927300000	481010000	1062200000	879540000	sp|A2RI32|AMPN_LACLMAminopeptidaseNOS=Lactococcuslactissubsp.cremoris(strainMG1363)GN=pepNPE=1SV=1	sp|A2RI32|AMPN_LACLMAminopeptidaseNOS=Lactococcuslactissubsp.cremoris(strainMG1363)GN=pepNPE=1SV=1
sp|A2RI67|GPMA_LACLM	sp|A2RI67|GPMA_LACLM	16	11	15	15	15	16	14	14	13	11	16	13	20	20	20	84.5	84.5	84.5	26.313	0	271.81	8634100000	2726	797730000	158370000	661080000	1276000000	453100000	1013300000	1238600000	689320000	502990000	548150000	467360000	529990000	sp|A2RI67|GPMA_LACLM2,3-bisphosphoglycerate-dependentphosphoglyceratemutaseOS=Lactococcuslactissubsp.cremoris(strainMG1363)GN=gpmAPE=3SV=1	sp|A2RI67|GPMA_LACLM2,3-bisphosphoglycerate-dependentphosphoglyceratemutaseOS=Lactococcuslactissubsp.cremoris(strainMG1363)GN=gpmAPE=3SV=1
sp|A2RI71|RECR_LACLM	sp|A2RI71|RECR_LACLM	7	6	4	5	6	5	8	5	5	3	5	6	10	10	10	56.6	56.6	56.6	21.95	0	111.12	109450000	84	7262600	14087000	5722700	10107000	6756700	9173900	5841600	7066500	6229100	11217000	7834900	10136000	sp|A2RI71|RECR_LACLMRecombinationproteinRecROS=Lactococcuslactissubsp.cremoris(strainMG1363)GN=recRPE=3SV=1	sp|A2RI71|RECR_LACLMRecombinationproteinRecROS=Lactococcuslactissubsp.cremoris(strainMG1363)GN=recRPE=3SV=1
sp|A2RI72|DDL_LACLM	sp|A2RI72|DDL_LACLM	18	19	16	16	13	15	15	15	13	12	13	12	19	19	19	67.6	67.6	67.6	38.678	0	266.71	2494000000	1003	98936000	168540000	172230000	164830000	211420000	162360000	141450000	131070000	101980000	181080000	146080000	118050000	sp|A2RI72|DDL_LACLMD-alanine--D-alanineligaseOS=Lactococcuslactissubsp.cremoris(strainMG1363)GN=ddlPE=3SV=1	sp|A2RI72|DDL_LACLMD-alanine--D-alanineligaseOS=Lactococcuslactissubsp.cremoris(strainMG1363)GN=ddlPE=3SV=1
sp|A2RI79|RF3_LACLM	sp|A2RI79|RF3_LACLM	29	31	27	24	26	25	25	23	25	15	22	18	36	36	36	70.6	70.6	70.6	59.502	0	323.31	15810000000	1276	607080000	534220000	533140000	348380000	449300000	381900000	377660000	349770000	310410000	318930000	206520000	445790000	sp|A2RI79|RF3_LACLMPeptidechainreleasefactor3OS=Lactococcuslactissubsp.cremoris(strainMG1363)GN=prfCPE=3SV=1	sp|A2RI79|RF3_LACLMPeptidechainreleasefactor3OS=Lactococcuslactissubsp.cremoris(strainMG1363)GN=prfCPE=3SV=1
sp|A2RI85|RECA_LACLM	sp|A2RI85|RECA_LACLM	26	31	26	21	21	24	17	20	20	18	23	20	34	34	34	74.7	74.7	74.7	41.38	0	323.31	5700100000	1367	917650000	679450000	588990000	738130000	613450000	637650000	480690000	368990000	463930000	634390000	673800000	438110000	sp|A2RI85|RECA_LACLMProteinRecAOS=Lactococcuslactissubsp.cremoris(strainMG1363)GN=recAPE=3SV=1	sp|A2RI85|RECA_LACLMProteinRecAOS=Lactococcuslactissubsp.cremoris(strainMG1363)GN=recAPE=3SV=1
sp|A2RI94|NADK_LACLM	sp|A2RI94|NADK_LACLM	3	8	3	4	3	3	3	2	3	3	3	2	8	8	8	27.4	27.4	27.4	30.342	0	26.263	19818000	58	1149300	1961200	2489600	2469200	1702000	1519700	1095200	1335500	1048300	1725100	1622700	1228500	sp|A2RI94|NADK_LACLMNADkinaseOS=Lactococcuslactissubsp.cremoris(strainMG1363)GN=nadKPE=3SV=1	sp|A2RI94|NADK_LACLMNADkinaseOS=Lactococcuslactissubsp.cremoris(strainMG1363)GN=nadKPE=3SV=1
sp|A2RIA0|SYK_LACLM	sp|A2RIA0|SYK_LACLM	44	47	37	34	33	32	33	36	34	27	32	27	52	52	52	83	83	83	56.617	0	323.31	39416000000	3026	1096100000	1125000000	902130000	689900000	611050000	553420000	564460000	633720000	618060000	275010000	524570000	667640000	sp|A2RIA0|SYK_LACLMLysine--tRNAligaseOS=Lactococcuslactissubsp.cremoris(strainMG1363)GN=lysSPE=3SV=1	sp|A2RIA0|SYK_LACLMLysine--tRNAligaseOS=Lactococcuslactissubsp.cremoris(strainMG1363)GN=lysSPE=3SV=1
sp|A2RIA6|THII_LACLM	sp|A2RIA6|THII_LACLM	19	18	13	14	13	14	12	13	12	8	12	10	23	23	23	61.1	61.1	61.1	45.223	0	134.9	1159100000	346	44508000	46533000	61517000	54024000	59464000	62143000	61865000	47017000	45080000	40016000	33789000	68575000	sp|A2RIA6|THII_LACLMProbabletRNAsulfurtransferaseOS=Lactococcuslactissubsp.cremoris(strainMG1363)GN=thiIPE=3SV=1	sp|A2RIA6|THII_LACLMProbabletRNAsulfurtransferaseOS=Lactococcuslactissubsp.cremoris(strainMG1363)GN=thiIPE=3SV=1
sp|A2RIB1|SYY_LACLM	sp|A2RIB1|SYY_LACLM	18	22	17	17	13	17	19	19	20	15	18	13	24	24	24	63.2	63.2	63.2	47.374	0	323.31	4461200000	1951	445770000	496300000	383850000	573110000	352910000	857080000	550780000	523750000	403480000	415470000	620720000	350250000	sp|A2RIB1|SYY_LACLMTyrosine--tRNAligaseOS=Lactococcuslactissubsp.cremoris(strainMG1363)GN=tyrSPE=3SV=1	sp|A2RIB1|SYY_LACLMTyrosine--tRNAligaseOS=Lactococcuslactissubsp.cremoris(strainMG1363)GN=tyrSPE=3SV=1
sp|A2RIB7|NAOX_LACLM	sp|A2RIB7|NAOX_LACLM	22	22	17	10	10	12	14	15	14	10	11	12	27	27	27	70.6	70.6	70.6	48.871	0	323.31	2072600000	474	64060000	62254000	57300000	26841000	51965000	64509000	65758000	52068000	57489000	57441000	39380000	52969000	sp|A2RIB7|NAOX_LACLMNADHoxidaseOS=Lactococcuslactissubsp.cremoris(strainMG1363)GN=noxEPE=1SV=1	sp|A2RIB7|NAOX_LACLMNADHoxidaseOS=Lactococcuslactissubsp.cremoris(strainMG1363)GN=noxEPE=1SV=1
sp|A2RIC4|KTHY_LACLM	sp|A2RIC4|KTHY_LACLM	8	7	7	5	6	5	10	7	7	5	5	5	13	13	13	56.9	56.9	56.9	23.972	0	101.41	221130000	176	9255800	12847000	21627000	12057000	8914500	30813000	15044000	17431000	16092000	24012000	14391000	11036000	sp|A2RIC4|KTHY_LACLMThymidylatekinaseOS=Lactococcuslactissubsp.cremoris(strainMG1363)GN=tmkPE=3SV=1	sp|A2RIC4|KTHY_LACLMThymidylatekinaseOS=Lactococcuslactissubsp.cremoris(strainMG1363)GN=tmkPE=3SV=1
sp|A2RIC7|YABA_LACLM	sp|A2RIC7|YABA_LACLM	0	0	0	1	0	2	0	1	2	1	1	1	4	4	4	43.5	43.5	43.5	12.586	0	25.34	2699500	13	0	0	0	0	0	0	0	0	0	595080	0	0	sp|A2RIC7|YABA_LACLMInitiation-controlproteinYabAOS=Lactococcuslactissubsp.cremoris(strainMG1363)GN=llmg_0418PE=3SV=1	sp|A2RIC7|YABA_LACLMInitiation-controlproteinYabAOS=Lactococcuslactissubsp.cremoris(strainMG1363)GN=llmg_0418PE=3SV=1
sp|A2RIF3|DNLJ_LACLM	sp|A2RIF3|DNLJ_LACLM	22	25	19	27	24	22	30	23	28	17	21	19	37	37	37	65.3	65.3	65.3	76.773	0	323.31	3373500000	792	106010000	109770000	81088000	178550000	148730000	178150000	170700000	150190000	107210000	109310000	114080000	126720000	sp|A2RIF3|DNLJ_LACLMDNAligaseOS=Lactococcuslactissubsp.cremoris(strainMG1363)GN=ligAPE=3SV=1	sp|A2RIF3|DNLJ_LACLMDNAligaseOS=Lactococcuslactissubsp.cremoris(strainMG1363)GN=ligAPE=3SV=1
sp|A2RIG0|GLMM_LACLM	sp|A2RIG0|GLMM_LACLM	19	19	16	19	17	19	19	21	18	17	20	18	28	28	28	77.9	77.9	77.9	48.689	0	323.31	1579400000	573	39688000	40577000	53381000	46511000	54157000	75008000	71453000	52599000	48494000	57097000	48838000	64893000	sp|A2RIG0|GLMM_LACLMPhosphoglucosaminemutaseOS=Lactococcuslactissubsp.cremoris(strainMG1363)GN=glmMPE=3SV=1	sp|A2RIG0|GLMM_LACLMPhosphoglucosaminemutaseOS=Lactococcuslactissubsp.cremoris(strainMG1363)GN=glmMPE=3SV=1
sp|A2RIH1|TRUA_LACLM	sp|A2RIH1|TRUA_LACLM	9	7	9	10	6	9	11	10	8	7	6	6	17	17	17	67.6	67.6	67.6	29.032	0	194.84	97030000	191	7073000	9621900	9423800	10021000	13180000	15883000	11447000	9460800	11668000	10460000	7634800	9550700	sp|A2RIH1|TRUA_LACLMtRNApseudouridinesynthaseAOS=Lactococcuslactissubsp.cremoris(strainMG1363)GN=truAPE=3SV=1	sp|A2RIH1|TRUA_LACLMtRNApseudouridinesynthaseAOS=Lactococcuslactissubsp.cremoris(strainMG1363)GN=truAPE=3SV=1
sp|A2RIH4|Y465_LACLM	sp|A2RIH4|Y465_LACLM	1	1	2	0	0	2	4	3	2	1	1	2	5	5	5	41.1	41.1	41.1	19.413	0	8.7716	6673500	43	0	0	0	0	0	3726000	2476100	1975300	3687300	0	0	2693800	sp|A2RIH4|Y465_LACLMUPF0340proteinllmg_0465OS=Lactococcuslactissubsp.cremoris(strainMG1363)GN=llmg_0465PE=3SV=1	sp|A2RIH4|Y465_LACLMUPF0340proteinllmg_0465OS=Lactococcuslactissubsp.cremoris(strainMG1363)GN=llmg_0465PE=3SV=1
sp|A2RIM2|Y513_LACLM	sp|A2RIM2|Y513_LACLM	1	1	1	1	1	0	2	2	2	0	1	0	2	2	2	13.2	13.2	13.2	20.837	0	22.97	3232100	36	952450	754430	566840	0	0	0	0	0	0	0	0	0	sp|A2RIM2|Y513_LACLMUPF0398proteinllmg_0513OS=Lactococcuslactissubsp.cremoris(strainMG1363)GN=llmg_0513PE=3SV=1	sp|A2RIM2|Y513_LACLMUPF0398proteinllmg_0513OS=Lactococcuslactissubsp.cremoris(strainMG1363)GN=llmg_0513PE=3SV=1
sp|A2RIM4|Y515_LACLM	sp|A2RIM4|Y515_LACLM	1	0	1	1	1	1	2	2	1	1	1	1	3	3	3	20.4	20.4	20.4	10.887	0	101.5	8265800	44	0	0	0	0	0	0	1188400	1727300	0	0	0	0	sp|A2RIM4|Y515_LACLMUPF0223proteinllmg_0515OS=Lactococcuslactissubsp.cremoris(strainMG1363)GN=llmg_0515PE=3SV=1	sp|A2RIM4|Y515_LACLMUPF0223proteinllmg_0515OS=Lactococcuslactissubsp.cremoris(strainMG1363)GN=llmg_0515PE=3SV=1
sp|A2RIM8|TIG_LACLM	sp|A2RIM8|TIG_LACLM	39	38	36	34	33	32	33	35	34	28	34	31	43	43	43	93.7	93.7	93.7	46.946	0	323.31	115120000000	6511	3748200000	2079000000	3557900000	4702600000	4119000000	2860500000	1511300000	2033000000	2438900000	1910800000	4231600000	3364400000	sp|A2RIM8|TIG_LACLMTriggerfactorOS=Lactococcuslactissubsp.cremoris(strainMG1363)GN=tigPE=3SV=1	sp|A2RIM8|TIG_LACLMTriggerfactorOS=Lactococcuslactissubsp.cremoris(strainMG1363)GN=tigPE=3SV=1
sp|A2RIP3|UVRB_LACLM	sp|A2RIP3|UVRB_LACLM	28	29	21	15	17	15	17	18	15	15	19	14	36	36	36	50.3	50.3	50.3	79.014	0	323.31	1984100000	332	61724000	54056000	53900000	38290000	36754000	44608000	53642000	47159000	38250000	45175000	45329000	29162000	sp|A2RIP3|UVRB_LACLMUvrABCsystemproteinBOS=Lactococcuslactissubsp.cremoris(strainMG1363)GN=uvrBPE=3SV=1	sp|A2RIP3|UVRB_LACLMUvrABCsystemproteinBOS=Lactococcuslactissubsp.cremoris(strainMG1363)GN=uvrBPE=3SV=1
sp|A2RIR4|RF1_LACLM	sp|A2RIR4|RF1_LACLM	22	24	19	18	16	20	17	20	18	19	18	17	35	35	35	86	86	86	40.448	0	196.45	780020000	523	61457000	60837000	38312000	72120000	46820000	62372000	62678000	47640000	45868000	63411000	61024000	41297000	sp|A2RIR4|RF1_LACLMPeptidechainreleasefactor1OS=Lactococcuslactissubsp.cremoris(strainMG1363)GN=prfAPE=3SV=1	sp|A2RIR4|RF1_LACLMPeptidechainreleasefactor1OS=Lactococcuslactissubsp.cremoris(strainMG1363)GN=prfAPE=3SV=1
sp|A2RIS0|GLYA_LACLM	sp|A2RIS0|GLYA_LACLM	26	25	20	21	20	19	19	20	20	11	18	14	30	30	30	79.8	79.8	79.8	44.822	0	323.31	4373300000	665	202750000	197210000	231070000	200970000	174760000	226550000	240490000	204420000	185860000	142120000	163300000	183530000	sp|A2RIS0|GLYA_LACLMSerinehydroxymethyltransferaseOS=Lactococcuslactissubsp.cremoris(strainMG1363)GN=glyAPE=3SV=1	sp|A2RIS0|GLYA_LACLMSerinehydroxymethyltransferaseOS=Lactococcuslactissubsp.cremoris(strainMG1363)GN=glyAPE=3SV=1
sp|A2RIS2|SERC_LACLM	sp|A2RIS2|SERC_LACLM	2	4	4	3	3	3	2	3	3	2	2	2	9	9	9	29.6	29.6	29.6	40.849	0	13.456	10480000	25	0	886360	1192400	767260	738240	1996100	1853300	1121400	1019800	777450	789710	973360	sp|A2RIS2|SERC_LACLMPhosphoserineaminotransferaseOS=Lactococcuslactissubsp.cremoris(strainMG1363)GN=serCPE=3SV=1	sp|A2RIS2|SERC_LACLMPhosphoserineaminotransferaseOS=Lactococcuslactissubsp.cremoris(strainMG1363)GN=serCPE=3SV=1
sp|A2RIT6|HPRK_LACLM	sp|A2RIT6|HPRK_LACLM	14	15	11	10	9	12	9	10	9	7	9	7	18	18	18	57.4	57.4	57.4	34.654	0	186.03	286050000	276	26146000	24534000	44691000	25663000	36395000	37818000	36911000	24116000	23129000	20712000	19832000	28486000	sp|A2RIT6|HPRK_LACLMHPrkinase/phosphorylaseOS=Lactococcuslactissubsp.cremoris(strainMG1363)GN=hprKPE=3SV=1	sp|A2RIT6|HPRK_LACLMHPrkinase/phosphorylaseOS=Lactococcuslactissubsp.cremoris(strainMG1363)GN=hprKPE=3SV=1
sp|A2RIT7|LGT_LACLM	sp|A2RIT7|LGT_LACLM	3	3	2	2	1	1	4	3	4	2	2	3	4	4	4	14.9	14.9	14.9	29.709	0	20.615	20551000	54	1301800	2776200	2097200	1185100	0	0	2405400	1998500	2274900	2235400	1483700	4761000	sp|A2RIT7|LGT_LACLMProlipoproteindiacylglyceryltransferaseOS=Lactococcuslactissubsp.cremoris(strainMG1363)GN=lgtPE=3SV=1	sp|A2RIT7|LGT_LACLMProlipoproteindiacylglyceryltransferaseOS=Lactococcuslactissubsp.cremoris(strainMG1363)GN=lgtPE=3SV=1
sp|A2RIU1|KUP2_LACLM	sp|A2RIU1|KUP2_LACLM	10	13	9	8	10	11	11	10	9	13	11	12	18	18	18	29.1	29.1	29.1	75.543	0	106.66	1075100000	501	36142000	29678000	38438000	40572000	37590000	19592000	15837000	30286000	32094000	46972000	38647000	44712000	sp|A2RIU1|KUP2_LACLMProbablepotassiumtransportsystemproteinkup2OS=Lactococcuslactissubsp.cremoris(strainMG1363)GN=kup2PE=3SV=1;sp|P96790|KUP1_LACLMPutativepotassiumtransportsystemproteinkup1OS=Lactococcuslactissubsp.cremoris(strainMG1363)GN=kup1PE=5SV=2	sp|A2RIU1|KUP2_LACLMProbablepotassiumtransportsystemproteinkup2OS=Lactococcuslactissubsp.cremoris(strainMG1363)GN=kup2PE=3SV=1
sp|A2RIU4|MIAA_LACLM	sp|A2RIU4|MIAA_LACLM	6	5	6	6	5	5	4	4	5	5	4	6	9	9	9	36.4	36.4	36.4	33.504	0	169.64	40843000	87	6964300	8441400	7116600	5461300	6804800	7992500	4942700	5267100	7089000	4644000	6373000	6260100	sp|A2RIU4|MIAA_LACLMtRNAdimethylallyltransferaseOS=Lactococcuslactissubsp.cremoris(strainMG1363)GN=miaAPE=3SV=1	sp|A2RIU4|MIAA_LACLMtRNAdimethylallyltransferaseOS=Lactococcuslactissubsp.cremoris(strainMG1363)GN=miaAPE=3SV=1
sp|A2RIV7|RNZ_LACLM	sp|A2RIV7|RNZ_LACLM	11	14	9	9	9	8	9	10	11	7	10	8	16	16	16	52.1	52.1	52.1	33.943	0	259.75	117420000	218	10872000	11157000	12423000	17962000	17445000	20830000	17372000	17504000	20695000	17539000	15123000	14937000	sp|A2RIV7|RNZ_LACLMRibonucleaseZOS=Lactococcuslactissubsp.cremoris(strainMG1363)GN=rnzPE=3SV=1	sp|A2RIV7|RNZ_LACLMRibonucleaseZOS=Lactococcuslactissubsp.cremoris(strainMG1363)GN=rnzPE=3SV=1
sp|A2RIW0|APT_LACLM	sp|A2RIW0|APT_LACLM	11	10	11	10	9	8	10	11	10	9	8	9	11	11	11	65.9	65.9	65.9	18.697	0	205.1	2147700000	1119	174540000	242330000	145920000	311060000	235510000	137830000	428100000	303370000	259890000	196690000	135170000	183770000	sp|A2RIW0|APT_LACLMAdeninephosphoribosyltransferaseOS=Lactococcuslactissubsp.cremoris(strainMG1363)GN=aptPE=3SV=1	sp|A2RIW0|APT_LACLMAdeninephosphoribosyltransferaseOS=Lactococcuslactissubsp.cremoris(strainMG1363)GN=aptPE=3SV=1
sp|A2RIW1|RPOE_LACLM	sp|A2RIW1|RPOE_LACLM	11	8	10	8	7	6	9	8	7	6	7	7	12	12	12	68.1	68.1	68.1	21.516	0	200.06	1595700000	441	122950000	157950000	210560000	237480000	114870000	50584000	131430000	93831000	64707000	54967000	94091000	85484000	sp|A2RIW1|RPOE_LACLMProbableDNA-directedRNApolymerasesubunitdeltaOS=Lactococcuslactissubsp.cremoris(strainMG1363)GN=rpoEPE=3SV=1	sp|A2RIW1|RPOE_LACLMProbableDNA-directedRNApolymerasesubunitdeltaOS=Lactococcuslactissubsp.cremoris(strainMG1363)GN=rpoEPE=3SV=1
sp|A2RIW3|GREA_LACLM	sp|A2RIW3|GREA_LACLM	12	15	14	13	12	9	15	13	14	11	10	13	16	16	16	82.7	82.7	82.7	17.247	0	202.52	1278800000	970	236060000	303690000	192610000	246410000	143250000	106230000	88513000	98945000	125300000	103020000	127260000	135320000	sp|A2RIW3|GREA_LACLMTranscriptionelongationfactorGreAOS=Lactococcuslactissubsp.cremoris(strainMG1363)GN=greAPE=3SV=1	sp|A2RIW3|GREA_LACLMTranscriptionelongationfactorGreAOS=Lactococcuslactissubsp.cremoris(strainMG1363)GN=greAPE=3SV=1
sp|A2RIX1|ENO_LACLM	sp|A2RIX1|ENO_LACLM	33	34	33	28	29	28	27	30	27	25	27	24	36	36	36	84.3	84.3	84.3	46.911	0	323.31	187450000000	16445	9567900000	7454800000	11733000000	14762000000	13673000000	20042000000	15565000000	10623000000	10276000000	13423000000	11062000000	9313600000	sp|A2RIX1|ENO_LACLMEnolaseOS=Lactococcuslactissubsp.cremoris(strainMG1363)GN=enoPE=3SV=1	sp|A2RIX1|ENO_LACLMEnolaseOS=Lactococcuslactissubsp.cremoris(strainMG1363)GN=enoPE=3SV=1
sp|A2RJ76|SYS_LACLM	sp|A2RJ76|SYS_LACLM	28	25	19	22	23	20	20	22	20	16	21	17	29	29	29	78	78	78	47.514	0	323.31	7076100000	1056	252660000	246950000	308790000	229240000	313680000	228440000	238830000	249760000	195740000	267380000	188230000	204910000	sp|A2RJ76|SYS_LACLMSerine--tRNAligaseOS=Lactococcuslactissubsp.cremoris(strainMG1363)GN=serSPE=3SV=1	sp|A2RJ76|SYS_LACLMSerine--tRNAligaseOS=Lactococcuslactissubsp.cremoris(strainMG1363)GN=serSPE=3SV=1
sp|A2RJ85|KCY_LACLM	sp|A2RJ85|KCY_LACLM	15	13	10	12	12	11	13	14	13	11	10	12	17	17	17	79.1	79.1	79.1	24.324	0	204.98	1035500000	576	83344000	108590000	53844000	105690000	73801000	160720000	76562000	83560000	78304000	121660000	108570000	83105000	sp|A2RJ85|KCY_LACLMCytidylatekinaseOS=Lactococcuslactissubsp.cremoris(strainMG1363)GN=cmkPE=3SV=1	sp|A2RJ85|KCY_LACLMCytidylatekinaseOS=Lactococcuslactissubsp.cremoris(strainMG1363)GN=cmkPE=3SV=1
sp|A2RJB4|URK_LACLM	sp|A2RJB4|URK_LACLM	8	7	6	8	9	6	9	9	9	8	7	10	13	13	13	70.9	70.9	70.9	23.754	0	101.58	572650000	390	52413000	25893000	54404000	58559000	40608000	60978000	57053000	70149000	47998000	72807000	39470000	61856000	sp|A2RJB4|URK_LACLMUridinekinaseOS=Lactococcuslactissubsp.cremoris(strainMG1363)GN=udkPE=3SV=1	sp|A2RJB4|URK_LACLMUridinekinaseOS=Lactococcuslactissubsp.cremoris(strainMG1363)GN=udkPE=3SV=1
sp|A2RJB8|FTSK_LACLM	sp|A2RJB8|FTSK_LACLM	13	14	13	14	20	23	18	19	20	18	17	19	27	27	27	39.9	39.9	39.9	82.961	0	202.76	329070000	696	67993000	80240000	59014000	17579000	54128000	57633000	34978000	42667000	34528000	33272000	31015000	48959000	sp|A2RJB8|FTSK_LACLMDNAtranslocaseFtsKOS=Lactococcuslactissubsp.cremoris(strainMG1363)GN=ftsKPE=1SV=1	sp|A2RJB8|FTSK_LACLMDNAtranslocaseFtsKOS=Lactococcuslactissubsp.cremoris(strainMG1363)GN=ftsKPE=1SV=1
sp|A2RJC6|FENR_LACLM	sp|A2RJC6|FENR_LACLM	11	13	8	7	5	9	7	7	8	5	3	5	14	14	14	56.4	56.4	56.4	35.008	0	97.177	76658000	182	10413000	10011000	9269400	8617500	5346900	8957500	9326300	7708800	6866800	7829400	2597700	7691700	sp|A2RJC6|FENR_LACLMFerredoxin--NADPreductaseOS=Lactococcuslactissubsp.cremoris(strainMG1363)GN=llmg_0776PE=3SV=1	sp|A2RJC6|FENR_LACLMFerredoxin--NADPreductaseOS=Lactococcuslactissubsp.cremoris(strainMG1363)GN=llmg_0776PE=3SV=1
sp|A2RJC8|MUTS2_LACLM	sp|A2RJC8|MUTS2_LACLM	34	39	32	24	25	23	25	26	26	22	27	17	46	46	46	63.3	63.3	63.3	87.376	0	323.31	3562100000	705	87237000	85458000	61145000	64723000	58978000	79252000	77315000	61251000	58716000	64526000	64136000	49633000	sp|A2RJC8|MUTS2_LACLMEndonucleaseMutS2OS=Lactococcuslactissubsp.cremoris(strainMG1363)GN=mutS2PE=3SV=1	sp|A2RJC8|MUTS2_LACLMEndonucleaseMutS2OS=Lactococcuslactissubsp.cremoris(strainMG1363)GN=mutS2PE=3SV=1
sp|A2RJD1|AROD_LACLM	sp|A2RJD1|AROD_LACLM	13	11	12	12	11	12	11	11	11	11	10	12	13	13	13	69	69	69	26.309	0	299.95	3760300000	750	311550000	181020000	269580000	539750000	327770000	547850000	434720000	360530000	408560000	251170000	584490000	337690000	sp|A2RJD1|AROD_LACLM3-dehydroquinatedehydrataseOS=Lactococcuslactissubsp.cremoris(strainMG1363)GN=aroDPE=3SV=1	sp|A2RJD1|AROD_LACLM3-dehydroquinatedehydrataseOS=Lactococcuslactissubsp.cremoris(strainMG1363)GN=aroDPE=3SV=1
sp|A2RJL6|DAPA_LACLM	sp|A2RJL6|DAPA_LACLM	8	9	8	6	6	5	6	6	6	4	4	3	11	11	11	40.7	40.7	40.7	32.32	0	97.058	159350000	88	19594000	19673000	16624000	15651000	9324300	18679000	13955000	11579000	10450000	8167000	10801000	11090000	sp|A2RJL6|DAPA_LACLM4-hydroxy-tetrahydrodipicolinatesynthaseOS=Lactococcuslactissubsp.cremoris(strainMG1363)GN=dapAPE=3SV=1	sp|A2RJL6|DAPA_LACLM4-hydroxy-tetrahydrodipicolinatesynthaseOS=Lactococcuslactissubsp.cremoris(strainMG1363)GN=dapAPE=3SV=1
sp|A2RJM8|PROA_LACLM	sp|A2RJM8|PROA_LACLM	13	12	12	10	8	10	10	11	9	7	9	7	16	16	16	50.6	50.6	50.6	45.159	0	46.392	506250000	151	26653000	26285000	32840000	23499000	27352000	19588000	24543000	20652000	18599000	13399000	19995000	28467000	sp|A2RJM8|PROA_LACLMGamma-glutamylphosphatereductaseOS=Lactococcuslactissubsp.cremoris(strainMG1363)GN=proAPE=3SV=2	sp|A2RJM8|PROA_LACLMGamma-glutamylphosphatereductaseOS=Lactococcuslactissubsp.cremoris(strainMG1363)GN=proAPE=3SV=2
sp|A2RJP7|RL31B_LACLM	sp|A2RJP7|RL31B_LACLM	7	5	7	8	8	8	8	8	8	7	8	6	8	8	8	86.4	86.4	86.4	9.3524	0	323.31	2171200000	2030	410530000	121380000	323760000	899540000	494530000	497480000	517090000	206300000	400160000	541410000	601960000	529760000	sp|A2RJP7|RL31B_LACLM50SribosomalproteinL31typeBOS=Lactococcuslactissubsp.cremoris(strainMG1363)GN=rpmE2PE=3SV=1	sp|A2RJP7|RL31B_LACLM50SribosomalproteinL31typeBOS=Lactococcuslactissubsp.cremoris(strainMG1363)GN=rpmE2PE=3SV=1
sp|A2RJQ3|MURD_LACLM	sp|A2RJQ3|MURD_LACLM	20	17	16	18	17	17	16	18	17	12	12	14	22	22	22	53.5	53.5	53.5	49.192	0	316.3	2938100000	410	157340000	176740000	178250000	191570000	174670000	151390000	152300000	153870000	153660000	103170000	143400000	167590000	sp|A2RJQ3|MURD_LACLMUDP-N-acetylmuramoylalanine--D-glutamateligaseOS=Lactococcuslactissubsp.cremoris(strainMG1363)GN=murDPE=3SV=1	sp|A2RJQ3|MURD_LACLMUDP-N-acetylmuramoylalanine--D-glutamateligaseOS=Lactococcuslactissubsp.cremoris(strainMG1363)GN=murDPE=3SV=1
sp|A2RJQ4|MURG_LACLM	sp|A2RJQ4|MURG_LACLM	10	11	7	13	11	13	12	12	11	10	9	10	17	17	17	62.5	62.5	62.5	39.226	0	167.59	319130000	299	27639000	31901000	33641000	35807000	42078000	28366000	21291000	22893000	40077000	44394000	44742000	37801000	sp|A2RJQ4|MURG_LACLMUDP-N-acetylglucosamine--N-acetylmuramyl-(pentapeptide)pyrophosphoryl-undecaprenolN-acetylglucosaminetransferaseOS=Lactococcuslactissubsp.cremoris(strainMG1363)GN=murGPE=3SV=1	sp|A2RJQ4|MURG_LACLMUDP-N-acetylglucosamine--N-acetylmuramyl-(pentapeptide)pyrophosphoryl-undecaprenolN-acetylglucosaminetransferaseOS=Lactococcuslactissubsp.cremoris(strainMG1363)GN=murGPE=3SV=1
sp|A2RJQ6|OBG_LACLM	sp|A2RJQ6|OBG_LACLM	25	26	21	24	26	25	23	22	21	17	24	17	35	35	35	70.9	70.9	70.9	48.235	0	261.53	2831500000	695	124360000	129930000	154030000	115140000	186960000	176370000	164750000	123520000	156560000	171250000	129500000	139930000	sp|A2RJQ6|OBG_LACLMGTPaseObgOS=Lactococcuslactissubsp.cremoris(strainMG1363)GN=obgPE=3SV=1	sp|A2RJQ6|OBG_LACLMGTPaseObgOS=Lactococcuslactissubsp.cremoris(strainMG1363)GN=obgPE=3SV=1
sp|A2RJR5|QUEA_LACLM	sp|A2RJR5|QUEA_LACLM	13	17	14	17	17	16	13	15	13	12	14	11	22	22	22	74.6	74.6	74.6	39.103	0	248.42	1556300000	536	111410000	164430000	107970000	123820000	128840000	141070000	135930000	134250000	105800000	90811000	138020000	112590000	sp|A2RJR5|QUEA_LACLMS-adenosylmethionine:tRNAribosyltransferase-isomeraseOS=Lactococcuslactissubsp.cremoris(strainMG1363)GN=queAPE=3SV=1	sp|A2RJR5|QUEA_LACLMS-adenosylmethionine:tRNAribosyltransferase-isomeraseOS=Lactococcuslactissubsp.cremoris(strainMG1363)GN=queAPE=3SV=1
sp|A2RJR7|NAGB_LACLM	sp|A2RJR7|NAGB_LACLM	8	8	6	5	5	5	4	5	4	3	3	3	9	9	9	26.8	26.8	26.8	25.689	0	47.153	184340000	160	25273000	21869000	20591000	18219000	17678000	6795900	9049600	9404700	11871000	8675000	16785000	10990000	sp|A2RJR7|NAGB_LACLMGlucosamine-6-phosphatedeaminaseOS=Lactococcuslactissubsp.cremoris(strainMG1363)GN=nagBPE=3SV=1	sp|A2RJR7|NAGB_LACLMGlucosamine-6-phosphatedeaminaseOS=Lactococcuslactissubsp.cremoris(strainMG1363)GN=nagBPE=3SV=1
sp|A2RJS1|RS16_LACLM	sp|A2RJS1|RS16_LACLM	5	2	4	5	6	6	5	5	4	4	4	4	7	7	7	57.8	57.8	57.8	10.252	0	201.54	2146800000	1218	489280000	248040000	311590000	216270000	230360000	232780000	312750000	139080000	240220000	246540000	149700000	162490000	sp|A2RJS1|RS16_LACLM30SribosomalproteinS16OS=Lactococcuslactissubsp.cremoris(strainMG1363)GN=rpsPPE=3SV=1	sp|A2RJS1|RS16_LACLM30SribosomalproteinS16OS=Lactococcuslactissubsp.cremoris(strainMG1363)GN=rpsPPE=3SV=1
sp|A2RJS5|RIMM_LACLM	sp|A2RJS5|RIMM_LACLM	6	7	6	6	4	6	6	6	6	6	6	7	7	7	7	50.9	50.9	50.9	19.649	0	159.26	740030000	333	47631000	42972000	82815000	95812000	74016000	49042000	69627000	72714000	84191000	66382000	59472000	65471000	sp|A2RJS5|RIMM_LACLMRibosomematurationfactorRimMOS=Lactococcuslactissubsp.cremoris(strainMG1363)GN=rimMPE=3SV=1	sp|A2RJS5|RIMM_LACLMRibosomematurationfactorRimMOS=Lactococcuslactissubsp.cremoris(strainMG1363)GN=rimMPE=3SV=1
sp|A2RJS9|DAPB_LACLM	sp|A2RJS9|DAPB_LACLM	9	8	8	5	7	7	7	6	6	6	8	7	13	13	13	38.8	38.8	38.8	28.673	0	43.09	150830000	124	31072000	10870000	18061000	6552300	29245000	14478000	8688900	15272000	15121000	12937000	19572000	23570000	sp|A2RJS9|DAPB_LACLM4-hydroxy-tetrahydrodipicolinatereductaseOS=Lactococcuslactissubsp.cremoris(strainMG1363)GN=dapBPE=3SV=1	sp|A2RJS9|DAPB_LACLM4-hydroxy-tetrahydrodipicolinatereductaseOS=Lactococcuslactissubsp.cremoris(strainMG1363)GN=dapBPE=3SV=1
sp|A2RJT1|CCA_LACLM	sp|A2RJT1|CCA_LACLM	9	10	5	6	6	8	6	10	8	2	6	4	14	14	14	34.8	34.8	34.8	46.653	0	30.884	139620000	92	4430900	5655900	6272700	6361300	6728700	5647700	5334100	5537500	4950700	3257500	3883800	6767100	sp|A2RJT1|CCA_LACLMCCA-addingenzymeOS=Lactococcuslactissubsp.cremoris(strainMG1363)GN=ccaPE=3SV=1	sp|A2RJT1|CCA_LACLMCCA-addingenzymeOS=Lactococcuslactissubsp.cremoris(strainMG1363)GN=ccaPE=3SV=1
sp|A2RJT9|PYRDA_LACLM	sp|A2RJT9|PYRDA_LACLM	8	9	6	7	6	7	7	8	7	6	6	6	9	9	9	29.3	29.3	29.3	34.21	0	57.449	194140000	156	26966000	19494000	22221000	14282000	11892000	9555900	11952000	11966000	14107000	14360000	11716000	20936000	sp|A2RJT9|PYRDA_LACLMDihydroorotatedehydrogenaseA(fumarate)OS=Lactococcuslactissubsp.cremoris(strainMG1363)GN=pyrDAPE=1SV=1	sp|A2RJT9|PYRDA_LACLMDihydroorotatedehydrogenaseA(fumarate)OS=Lactococcuslactissubsp.cremoris(strainMG1363)GN=pyrDAPE=1SV=1
sp|A2RJW3|PURL_LACLM	sp|A2RJW3|PURL_LACLM	15	15	15	18	14	16	15	20	18	13	19	14	27	27	27	44.5	44.5	44.5	79.635	0	257.14	417260000	274	11165000	13150000	14661000	11113000	20998000	18008000	15451000	18366000	16817000	21781000	15466000	20064000	sp|A2RJW3|PURL_LACLMPhosphoribosylformylglycinamidinesynthasesubunitPurLOS=Lactococcuslactissubsp.cremoris(strainMG1363)GN=purLPE=3SV=1	sp|A2RJW3|PURL_LACLMPhosphoribosylformylglycinamidinesynthasesubunitPurLOS=Lactococcuslactissubsp.cremoris(strainMG1363)GN=purLPE=3SV=1
sp|A2RJY0|PUR9_LACLM	sp|A2RJY0|PUR9_LACLM	11	11	8	10	7	8	5	8	6	5	5	6	18	18	18	44.4	44.4	44.4	57.158	0	151.02	265060000	118	3579500	6027600	11374000	11578000	10413000	16800000	8124700	7307300	6784100	10302000	6431300	11768000	sp|A2RJY0|PUR9_LACLMBifunctionalpurinebiosynthesisproteinPurHOS=Lactococcuslactissubsp.cremoris(strainMG1363)GN=purHPE=3SV=1	sp|A2RJY0|PUR9_LACLMBifunctionalpurinebiosynthesisproteinPurHOS=Lactococcuslactissubsp.cremoris(strainMG1363)GN=purHPE=3SV=1
sp|A2RK17|TRPD_LACLM	sp|A2RK17|TRPD_LACLM	4	3	3	2	2	2	1	2	3	1	2	1	6	6	6	20	20	20	35.726	0	7.1555	8813800	19	2164000	851050	2515500	1322200	0	610930	0	867560	949840	0	0	0	sp|A2RK17|TRPD_LACLMAnthranilatephosphoribosyltransferaseOS=Lactococcuslactissubsp.cremoris(strainMG1363)GN=trpDPE=3SV=1	sp|A2RK17|TRPD_LACLMAnthranilatephosphoribosyltransferaseOS=Lactococcuslactissubsp.cremoris(strainMG1363)GN=trpDPE=3SV=1
sp|A2RK24|TRPB_LACLM	sp|A2RK24|TRPB_LACLM	5	7	2	3	3	3	1	2	2	2	3	1	9	9	9	24.9	24.9	24.9	43.7	0	93.228	28384000	27	1007200	2375800	1322800	1637100	761510	570870	0	988320	1712900	1151400	1651300	0	sp|A2RK24|TRPB_LACLMTryptophansynthasebetachainOS=Lactococcuslactissubsp.cremoris(strainMG1363)GN=trpBPE=3SV=1	sp|A2RK24|TRPB_LACLMTryptophansynthasebetachainOS=Lactococcuslactissubsp.cremoris(strainMG1363)GN=trpBPE=3SV=1
sp|A2RK25|TRPA_LACLM	sp|A2RK25|TRPA_LACLM	5	1	1	1	0	0	3	1	2	2	1	1	9	9	9	59.3	59.3	59.3	27.65	0.0013689	2.1433	64942000	13	0	0	0	0	0	0	7677100	0	8211100	0	0	0	sp|A2RK25|TRPA_LACLMTryptophansynthasealphachainOS=Lactococcuslactissubsp.cremoris(strainMG1363)GN=trpAPE=3SV=1	sp|A2RK25|TRPA_LACLMTryptophansynthasealphachainOS=Lactococcuslactissubsp.cremoris(strainMG1363)GN=trpAPE=3SV=1
sp|A2RK41|COAA_LACLM	sp|A2RK41|COAA_LACLM	5	7	3	2	1	1	1	3	2	2	3	2	9	9	9	35.9	35.9	35.9	35.954	0	54.606	51782000	46	2636500	7085200	3297400	0	0	0	0	1714300	1545700	1414000	1847800	1310400	sp|A2RK41|COAA_LACLMPantothenatekinaseOS=Lactococcuslactissubsp.cremoris(strainMG1363)GN=coaAPE=3SV=1	sp|A2RK41|COAA_LACLMPantothenatekinaseOS=Lactococcuslactissubsp.cremoris(strainMG1363)GN=coaAPE=3SV=1
sp|A2RK45|DEOC_LACLM	sp|A2RK45|DEOC_LACLM	13	11	13	14	12	12	12	12	12	11	8	10	14	14	14	59.5	59.5	59.5	23.455	0	199.37	1068100000	660	108650000	108890000	101440000	68043000	85732000	59922000	49925000	47234000	45269000	103510000	69269000	58400000	sp|A2RK45|DEOC_LACLMDeoxyribose-phosphatealdolaseOS=Lactococcuslactissubsp.cremoris(strainMG1363)GN=deoCPE=3SV=1	sp|A2RK45|DEOC_LACLMDeoxyribose-phosphatealdolaseOS=Lactococcuslactissubsp.cremoris(strainMG1363)GN=deoCPE=3SV=1
sp|A2RK52|Y1069_LACLM	sp|A2RK52|Y1069_LACLM	6	2	5	5	5	3	5	3	4	6	5	3	7	7	7	43.2	43.2	43.2	13.532	0	49.641	54081000	116	9889300	7932100	7698900	11382000	7306200	10085000	5543800	9831400	10321000	10024000	7369900	13774000	sp|A2RK52|Y1069_LACLMUPF0122proteinllmg_1069OS=Lactococcuslactissubsp.cremoris(strainMG1363)GN=llmg_1069PE=3SV=1	sp|A2RK52|Y1069_LACLMUPF0122proteinllmg_1069OS=Lactococcuslactissubsp.cremoris(strainMG1363)GN=llmg_1069PE=3SV=1
sp|A2RK93|RSMG_LACLM	sp|A2RK93|RSMG_LACLM	13	12	10	11	10	10	10	9	11	10	9	8	17	17	17	68.5	68.5	68.5	26.855	0	141.62	376980000	374	37579000	41864000	29772000	24001000	24785000	18308000	29752000	25952000	22422000	43066000	30962000	28648000	sp|A2RK93|RSMG_LACLMRibosomalRNAsmallsubunitmethyltransferaseGOS=Lactococcuslactissubsp.cremoris(strainMG1363)GN=rsmGPE=3SV=1	sp|A2RK93|RSMG_LACLMRibosomalRNAsmallsubunitmethyltransferaseGOS=Lactococcuslactissubsp.cremoris(strainMG1363)GN=rsmGPE=3SV=1
sp|A2RK98|GPDA_LACLM	sp|A2RK98|GPDA_LACLM	23	25	22	22	25	21	20	22	20	17	17	17	26	26	26	89.8	89.8	89.8	37.349	0	323.31	2290000000	1285	94830000	105740000	163210000	200680000	194450000	296500000	220930000	234960000	234480000	207370000	190220000	199640000	sp|A2RK98|GPDA_LACLMGlycerol-3-phosphatedehydrogenase[NAD(P)+]OS=Lactococcuslactissubsp.cremoris(strainMG1363)GN=gpsAPE=3SV=1	sp|A2RK98|GPDA_LACLMGlycerol-3-phosphatedehydrogenase[NAD(P)+]OS=Lactococcuslactissubsp.cremoris(strainMG1363)GN=gpsAPE=3SV=1
sp|A2RKA2|PFKA_LACLM	sp|A2RKA2|PFKA_LACLM	22	25	16	18	15	19	15	20	17	18	15	14	26	26	26	83.2	83.2	83.2	35.805	0	323.31	5290400000	3104	674900000	962360000	1047800000	971390000	827580000	1098200000	1229800000	928940000	787710000	691360000	802780000	632080000	sp|A2RKA2|PFKA_LACLMATP-dependent6-phosphofructokinaseOS=Lactococcuslactissubsp.cremoris(strainMG1363)GN=pfkAPE=3SV=1	sp|A2RKA2|PFKA_LACLMATP-dependent6-phosphofructokinaseOS=Lactococcuslactissubsp.cremoris(strainMG1363)GN=pfkAPE=3SV=1
sp|A2RKG9|Y1186_LACLM	sp|A2RKG9|Y1186_LACLM	4	4	4	4	4	4	4	4	4	3	4	4	4	4	4	44.3	44.3	44.3	8.9326	0	126.08	1053800000	1651	180630000	189980000	193360000	21821000	44683000	47778000	40292000	30300000	35011000	35016000	37987000	40050000	sp|A2RKG9|Y1186_LACLMUPF0154proteinllmg_1186OS=Lactococcuslactissubsp.cremoris(strainMG1363)GN=llmg_1186PE=3SV=1	sp|A2RKG9|Y1186_LACLMUPF0154proteinllmg_1186OS=Lactococcuslactissubsp.cremoris(strainMG1363)GN=llmg_1186PE=3SV=1
sp|A2RKH0|MURI_LACLM	sp|A2RKH0|MURI_LACLM	6	4	4	4	4	7	4	4	5	5	4	4	9	9	9	41.3	41.3	41.3	30.23	0	61.847	64966000	81	4807200	8734600	10177000	4202000	7237000	10609000	4981400	5221500	5505000	5387600	6644700	7066300	sp|A2RKH0|MURI_LACLMGlutamateracemaseOS=Lactococcuslactissubsp.cremoris(strainMG1363)GN=murIPE=3SV=1	sp|A2RKH0|MURI_LACLMGlutamateracemaseOS=Lactococcuslactissubsp.cremoris(strainMG1363)GN=murIPE=3SV=1
sp|A2RKH4|XERDL_LACLM	sp|A2RKH4|XERDL_LACLM	8	2	6	6	4	4	5	5	4	2	3	3	10	10	10	32.4	32.4	32.4	28.384	0	34.757	87300000	91	7264900	5682400	7426300	4025800	3245400	3510900	4128700	4135900	3456000	9235400	4931300	6937300	sp|A2RKH4|XERDL_LACLMTyrosinerecombinaseXerD-likeOS=Lactococcuslactissubsp.cremoris(strainMG1363)GN=llmg_1191PE=3SV=1	sp|A2RKH4|XERDL_LACLMTyrosinerecombinaseXerD-likeOS=Lactococcuslactissubsp.cremoris(strainMG1363)GN=llmg_1191PE=3SV=1
sp|A2RKH5|SCPA_LACLM	sp|A2RKH5|SCPA_LACLM	4	3	4	4	3	5	4	4	4	3	2	4	7	7	7	33.9	33.9	33.9	28.563	0	42.508	54992000	78	3857900	11912000	3593100	5251200	9446400	8105700	5881800	5505600	5675600	4668400	8640400	4853600	sp|A2RKH5|SCPA_LACLMSegregationandcondensationproteinAOS=Lactococcuslactissubsp.cremoris(strainMG1363)GN=scpAPE=3SV=1	sp|A2RKH5|SCPA_LACLMSegregationandcondensationproteinAOS=Lactococcuslactissubsp.cremoris(strainMG1363)GN=scpAPE=3SV=1
sp|A2RKH6|SCPB_LACLM	sp|A2RKH6|SCPB_LACLM	8	10	10	9	8	6	10	11	11	8	7	9	13	13	13	72.9	72.9	72.9	21.174	0	231.93	165100000	287	51611000	35667000	32197000	30861000	20940000	27513000	19701000	21998000	24473000	24577000	29552000	27693000	sp|A2RKH6|SCPB_LACLMSegregationandcondensationproteinBOS=Lactococcuslactissubsp.cremoris(strainMG1363)GN=scpBPE=3SV=1	sp|A2RKH6|SCPB_LACLMSegregationandcondensationproteinBOS=Lactococcuslactissubsp.cremoris(strainMG1363)GN=scpBPE=3SV=1
sp|A2RKI8|RL10_LACLM	sp|A2RKI8|RL10_LACLM	24	22	21	20	21	21	21	21	19	19	19	19	26	26	26	99.4	99.4	99.4	18.115	0	323.31	28144000000	11103	6370800000	4992700000	4306100000	5688000000	5384400000	5751300000	3957800000	3958300000	4620200000	4200600000	4555600000	2689200000	sp|A2RKI8|RL10_LACLM50SribosomalproteinL10OS=Lactococcuslactissubsp.cremoris(strainMG1363)GN=rplJPE=3SV=1	sp|A2RKI8|RL10_LACLM50SribosomalproteinL10OS=Lactococcuslactissubsp.cremoris(strainMG1363)GN=rplJPE=3SV=1
sp|A2RKI9|RL7_LACLM	sp|A2RKI9|RL7_LACLM	16	17	15	16	18	18	19	18	15	13	12	12	19	19	19	100	100	100	12.374	0	323.31	21877000000	7879	2507100000	3278400000	3422200000	3232900000	5208900000	2739400000	3171300000	3466000000	3074800000	2331400000	2766000000	2292900000	sp|A2RKI9|RL7_LACLM50SribosomalproteinL7/L12OS=Lactococcuslactissubsp.cremoris(strainMG1363)GN=rplLPE=3SV=1	sp|A2RKI9|RL7_LACLM50SribosomalproteinL7/L12OS=Lactococcuslactissubsp.cremoris(strainMG1363)GN=rplLPE=3SV=1
sp|A2RKK4|METE_LACLM	sp|A2RKK4|METE_LACLM	0	0	0	2	2	3	1	0	0	0	2	2	4	4	4	5.4	5.4	5.4	87.115	0	11.78	706500	11	0	0	0	503430	589460	582320	0	0	0	0	0	0	sp|A2RKK4|METE_LACLM5-methyltetrahydropteroyltriglutamate--homocysteinemethyltransferaseOS=Lactococcuslactissubsp.cremoris(strainMG1363)GN=metEPE=3SV=1	sp|A2RKK4|METE_LACLM5-methyltetrahydropteroyltriglutamate--homocysteinemethyltransferaseOS=Lactococcuslactissubsp.cremoris(strainMG1363)GN=metEPE=3SV=1
sp|A2RKP9|XERS_LACLM	sp|A2RKP9|XERS_LACLM	2	5	3	4	3	2	2	2	2	2	3	1	7	7	7	26.7	26.7	26.7	41.307	0	79.443	44348000	41	2131500	3709200	3311400	3423800	5525900	2262700	2441700	2878500	3040700	2910900	2906400	0	sp|A2RKP9|XERS_LACLMTyrosinerecombinaseXerSOS=Lactococcuslactissubsp.cremoris(strainMG1363)GN=xerSPE=1SV=1	sp|A2RKP9|XERS_LACLMTyrosinerecombinaseXerSOS=Lactococcuslactissubsp.cremoris(strainMG1363)GN=xerSPE=1SV=1
sp|A2RKQ0|TRMFO_LACLM	sp|A2RKQ0|TRMFO_LACLM	17	18	13	16	15	15	14	18	14	9	15	9	22	22	22	69.4	69.4	69.4	50.2	0	239.31	1178700000	417	50252000	42992000	53659000	62614000	59149000	83559000	70029000	54328000	64046000	62916000	54195000	56709000	sp|A2RKQ0|TRMFO_LACLMMethylenetetrahydrofolate--tRNA-(uracil-5-)-methyltransferaseTrmFOOS=Lactococcuslactissubsp.cremoris(strainMG1363)GN=trmFOPE=3SV=1	sp|A2RKQ0|TRMFO_LACLMMethylenetetrahydrofolate--tRNA-(uracil-5-)-methyltransferaseTrmFOOS=Lactococcuslactissubsp.cremoris(strainMG1363)GN=trmFOPE=3SV=1
sp|A2RKQ6|ILVC_LACLM	sp|A2RKQ6|ILVC_LACLM	4	3	4	3	3	3	3	3	3	2	3	3	5	5	5	20.9	20.9	20.9	37.258	0	16.084	31805000	35	2724300	2080800	2817900	1159500	2641400	1575100	2277300	1904000	1638400	1767900	1441200	2907200	sp|A2RKQ6|ILVC_LACLMKetol-acidreductoisomeraseOS=Lactococcuslactissubsp.cremoris(strainMG1363)GN=ilvCPE=3SV=1	sp|A2RKQ6|ILVC_LACLMKetol-acidreductoisomeraseOS=Lactococcuslactissubsp.cremoris(strainMG1363)GN=ilvCPE=3SV=1
sp|A2RKR4|Y1287_LACLM	sp|A2RKR4|Y1287_LACLM	11	14	9	11	11	10	9	10	10	8	10	4	14	14	14	46.1	46.1	46.1	36.74	0	163.69	773840000	363	81428000	82030000	56078000	73076000	60561000	40458000	52568000	50893000	37817000	49415000	35766000	13829000	sp|A2RKR4|Y1287_LACLMUPF0176proteinllmg_1287OS=Lactococcuslactissubsp.cremoris(strainMG1363)GN=llmg_1287PE=3SV=1	sp|A2RKR4|Y1287_LACLMUPF0176proteinllmg_1287OS=Lactococcuslactissubsp.cremoris(strainMG1363)GN=llmg_1287PE=3SV=1
sp|A2RKU2|NANE_LACLM	sp|A2RKU2|NANE_LACLM	14	13	12	7	6	8	8	9	8	6	6	6	15	15	15	61.5	61.5	61.5	25.643	0	77.409	446170000	312	33793000	30530000	43807000	13811000	19778000	29865000	16587000	13625000	15418000	8650000	16454000	14314000	sp|A2RKU2|NANE_LACLMPutativeN-acetylmannosamine-6-phosphate2-epimeraseOS=Lactococcuslactissubsp.cremoris(strainMG1363)GN=nanEPE=3SV=1	sp|A2RKU2|NANE_LACLMPutativeN-acetylmannosamine-6-phosphate2-epimeraseOS=Lactococcuslactissubsp.cremoris(strainMG1363)GN=nanEPE=3SV=1
sp|A2RKV4|MURB_LACLM	sp|A2RKV4|MURB_LACLM	18	17	16	15	13	17	16	16	17	13	13	15	20	20	20	62.9	62.9	62.9	32.044	0	323.31	921530000	627	114640000	110310000	114060000	86758000	92152000	186400000	137060000	102580000	119390000	89956000	105630000	102200000	sp|A2RKV4|MURB_LACLMUDP-N-acetylenolpyruvoylglucosaminereductaseOS=Lactococcuslactissubsp.cremoris(strainMG1363)GN=murBPE=3SV=1	sp|A2RKV4|MURB_LACLMUDP-N-acetylenolpyruvoylglucosaminereductaseOS=Lactococcuslactissubsp.cremoris(strainMG1363)GN=murBPE=3SV=1
sp|A2RKV6|KHSE_LACLM	sp|A2RKV6|KHSE_LACLM	8	10	10	10	9	8	8	8	6	9	8	8	13	13	13	49	49	49	31.892	0	102.36	296740000	216	41642000	41651000	41452000	26172000	40267000	43738000	22922000	27402000	31376000	26358000	30420000	35029000	sp|A2RKV6|KHSE_LACLMHomoserinekinaseOS=Lactococcuslactissubsp.cremoris(strainMG1363)GN=thrBPE=3SV=1	sp|A2RKV6|KHSE_LACLMHomoserinekinaseOS=Lactococcuslactissubsp.cremoris(strainMG1363)GN=thrBPE=3SV=1
sp|A2RKW7|TRML_LACLM	sp|A2RKW7|TRML_LACLM	3	6	5	4	2	3	5	3	5	1	3	3	7	7	7	40.8	40.8	40.8	19.825	0	30.945	81159000	128	11058000	30945000	25402000	11458000	3106100	5671300	12288000	3316600	7607600	0	6401800	3174500	sp|A2RKW7|TRML_LACLMPutativetRNA(cytidine(34)-2'-O)-methyltransferaseOS=Lactococcuslactissubsp.cremoris(strainMG1363)GN=llmg_1343PE=3SV=2	sp|A2RKW7|TRML_LACLMPutativetRNA(cytidine(34)-2'-O)-methyltransferaseOS=Lactococcuslactissubsp.cremoris(strainMG1363)GN=llmg_1343PE=3SV=2
sp|A2RKX0|XPT_LACLM	sp|A2RKX0|XPT_LACLM	13	12	12	13	13	13	16	11	11	11	7	11	16	16	16	85.3	85.3	85.3	21.725	0	227.87	1005300000	483	72321000	82310000	69752000	121150000	88942000	121370000	105740000	80881000	103140000	106130000	106930000	92985000	sp|A2RKX0|XPT_LACLMXanthinephosphoribosyltransferaseOS=Lactococcuslactissubsp.cremoris(strainMG1363)GN=xptPE=3SV=1	sp|A2RKX0|XPT_LACLMXanthinephosphoribosyltransferaseOS=Lactococcuslactissubsp.cremoris(strainMG1363)GN=xptPE=3SV=1
sp|A2RL29|GUAC_LACLM	sp|A2RL29|GUAC_LACLM	9	13	9	5	6	8	6	6	6	5	6	5	17	17	17	53.8	53.8	53.8	35.814	0	55.142	91470000	121	8055200	11984000	8186300	15878000	8860900	8864700	13019000	13829000	23488000	14416000	11777000	23180000	sp|A2RL29|GUAC_LACLMGMPreductaseOS=Lactococcuslactissubsp.cremoris(strainMG1363)GN=guaCPE=3SV=1	sp|A2RL29|GUAC_LACLMGMPreductaseOS=Lactococcuslactissubsp.cremoris(strainMG1363)GN=guaCPE=3SV=1
sp|A2RL40|TPIS_LACLM	sp|A2RL40|TPIS_LACLM	15	10	14	13	12	11	13	13	12	12	13	12	19	19	19	93.3	93.3	93.3	26.933	0	323.31	26192000000	4855	3815700000	2526200000	3320400000	3050400000	2158900000	4597200000	3474300000	2936000000	2089800000	1496100000	2405600000	1580900000	sp|A2RL40|TPIS_LACLMTriosephosphateisomeraseOS=Lactococcuslactissubsp.cremoris(strainMG1363)GN=tpiAPE=3SV=1	sp|A2RL40|TPIS_LACLMTriosephosphateisomeraseOS=Lactococcuslactissubsp.cremoris(strainMG1363)GN=tpiAPE=3SV=1
sp|A2RL43|MURQ_LACLM	sp|A2RL43|MURQ_LACLM	3	3	2	4	3	5	1	2	2	1	2	5	7	7	7	20.2	20.2	20.2	31.997	0	60.869	18128000	25	4655000	3117800	7490200	4185000	5128900	8299300	0	4502800	0	0	4960900	7094200	sp|A2RL43|MURQ_LACLMN-acetylmuramicacid6-phosphateetheraseOS=Lactococcuslactissubsp.cremoris(strainMG1363)GN=murQPE=3SV=1	sp|A2RL43|MURQ_LACLMN-acetylmuramicacid6-phosphateetheraseOS=Lactococcuslactissubsp.cremoris(strainMG1363)GN=murQPE=3SV=1
sp|A2RL47|TRUB_LACLM	sp|A2RL47|TRUB_LACLM	6	10	4	7	4	6	4	5	5	5	8	5	13	13	13	47	47	47	36.56	0	84.099	83143000	85	5909200	5406600	4727000	5184000	4626400	7885300	9727900	5468800	5527200	6215700	4444300	4113300	sp|A2RL47|TRUB_LACLMtRNApseudouridinesynthaseBOS=Lactococcuslactissubsp.cremoris(strainMG1363)GN=truBPE=3SV=1	sp|A2RL47|TRUB_LACLMtRNApseudouridinesynthaseBOS=Lactococcuslactissubsp.cremoris(strainMG1363)GN=truBPE=3SV=1
sp|A2RL76|LEPA_LACLM	sp|A2RL76|LEPA_LACLM	29	28	28	24	28	23	30	29	29	25	24	25	36	36	36	62.4	62.4	62.4	67.698	0	323.31	8006400000	806	260440000	265730000	243420000	207810000	230830000	278570000	252400000	236040000	226660000	283070000	238700000	262840000	sp|A2RL76|LEPA_LACLMElongationfactor4OS=Lactococcuslactissubsp.cremoris(strainMG1363)GN=lepAPE=3SV=1	sp|A2RL76|LEPA_LACLMElongationfactor4OS=Lactococcuslactissubsp.cremoris(strainMG1363)GN=lepAPE=3SV=1
sp|A2RL82|NADE_LACLM	sp|A2RL82|NADE_LACLM	16	19	10	14	11	14	13	15	14	12	14	12	21	21	21	84.3	84.3	84.3	30.149	0	213.66	1239100000	389	132610000	141950000	162620000	165120000	124750000	186480000	153570000	128060000	130740000	137060000	142410000	145010000	sp|A2RL82|NADE_LACLMNH(3)-dependentNAD(+)synthetaseOS=Lactococcuslactissubsp.cremoris(strainMG1363)GN=nadEPE=3SV=1	sp|A2RL82|NADE_LACLMNH(3)-dependentNAD(+)synthetaseOS=Lactococcuslactissubsp.cremoris(strainMG1363)GN=nadEPE=3SV=1
sp|A2RL87|Y1475_LACLM	sp|A2RL87|Y1475_LACLM	5	3	6	6	5	9	4	5	6	5	5	4	12	12	12	80	80	80	9.2464	0	65.51	189740000	203	29406000	17487000	36134000	5810000	3069800	13449000	3839800	6450200	7464300	3554200	9391400	9684200	sp|A2RL87|Y1475_LACLMUPF0291proteinllmg_1475OS=Lactococcuslactissubsp.cremoris(strainMG1363)GN=llmg_1475PE=3SV=1	sp|A2RL87|Y1475_LACLMUPF0291proteinllmg_1475OS=Lactococcuslactissubsp.cremoris(strainMG1363)GN=llmg_1475PE=3SV=1
sp|A2RL88|SYGB_LACLM	sp|A2RL88|SYGB_LACLM	37	37	39	26	32	31	33	31	29	28	32	26	47	47	47	77.7	77.7	77.7	75.641	0	323.31	17441000000	1958	557210000	555520000	418170000	305800000	344940000	281680000	316960000	337660000	279840000	318440000	327000000	305990000	sp|A2RL88|SYGB_LACLMGlycine--tRNAligasebetasubunitOS=Lactococcuslactissubsp.cremoris(strainMG1363)GN=glySPE=3SV=1	sp|A2RL88|SYGB_LACLMGlycine--tRNAligasebetasubunitOS=Lactococcuslactissubsp.cremoris(strainMG1363)GN=glySPE=3SV=1
sp|A2RL98|YBEY_LACLM	sp|A2RL98|YBEY_LACLM	4	4	3	5	4	4	3	3	4	3	4	5	6	6	6	49.4	49.4	49.4	18.785	0	116.94	167770000	179	17506000	7767500	13599000	8876400	14573000	8194000	6221200	6477900	7581600	13903000	7529200	8940200	sp|A2RL98|YBEY_LACLMEndoribonucleaseYbeYOS=Lactococcuslactissubsp.cremoris(strainMG1363)GN=ybeYPE=3SV=1	sp|A2RL98|YBEY_LACLMEndoribonucleaseYbeYOS=Lactococcuslactissubsp.cremoris(strainMG1363)GN=ybeYPE=3SV=1
sp|A2RLA2|RL27_LACLM	sp|A2RLA2|RL27_LACLM	4	3	4	4	4	5	4	3	3	3	4	3	6	6	6	56.4	56.4	56.4	10.033	0	84.557	2822000000	2376	500490000	718990000	531520000	694980000	508540000	444610000	563000000	613130000	515090000	435130000	563040000	562440000	sp|A2RLA2|RL27_LACLM50SribosomalproteinL27OS=Lactococcuslactissubsp.cremoris(strainMG1363)GN=rpmAPE=3SV=1	sp|A2RLA2|RL27_LACLM50SribosomalproteinL27OS=Lactococcuslactissubsp.cremoris(strainMG1363)GN=rpmAPE=3SV=1
sp|A2RLA4|RL21_LACLM	sp|A2RLA4|RL21_LACLM	10	10	9	8	8	7	8	7	5	7	6	7	12	12	12	80.8	80.8	80.8	11.423	0	257	9855300000	7012	551800000	820650000	645820000	857060000	2368800000	1645900000	2259700000	1458000000	1898700000	1888300000	1384000000	1106800000	sp|A2RLA4|RL21_LACLM50SribosomalproteinL21OS=Lactococcuslactissubsp.cremoris(strainMG1363)GN=rplUPE=3SV=1	sp|A2RLA4|RL21_LACLM50SribosomalproteinL21OS=Lactococcuslactissubsp.cremoris(strainMG1363)GN=rplUPE=3SV=1
sp|A2RLC0|PYRE_LACLM	sp|A2RLC0|PYRE_LACLM	14	12	11	11	11	6	13	14	13	10	11	11	16	16	16	92.8	92.8	92.8	22.591	0	190.13	889940000	401	83897000	56983000	111840000	59337000	49067000	53983000	74002000	74473000	67312000	83506000	69986000	66714000	sp|A2RLC0|PYRE_LACLMOrotatephosphoribosyltransferaseOS=Lactococcuslactissubsp.cremoris(strainMG1363)GN=pyrEPE=3SV=1;tr|A2RIW6|A2RIW6_LACLMUncharacterizedproteinOS=Lactococcuslactissubsp.cremoris(strainMG1363)GN=llmg_0612PE=4SV=1	sp|A2RLC0|PYRE_LACLMOrotatephosphoribosyltransferaseOS=Lactococcuslactissubsp.cremoris(strainMG1363)GN=pyrEPE=3SV=1
sp|A2RLC3|REX_LACLM	sp|A2RLC3|REX_LACLM	17	14	15	17	14	14	14	14	14	14	14	14	21	21	21	85.6	85.6	85.6	24.307	0	257.7	2547700000	744	272080000	227450000	234700000	290720000	174250000	295590000	318330000	234040000	245630000	337100000	213660000	164740000	sp|A2RLC3|REX_LACLMRedox-sensingtranscriptionalrepressorRexOS=Lactococcuslactissubsp.cremoris(strainMG1363)GN=rexPE=3SV=1	sp|A2RLC3|REX_LACLMRedox-sensingtranscriptionalrepressorRexOS=Lactococcuslactissubsp.cremoris(strainMG1363)GN=rexPE=3SV=1
sp|A2RLF5|RF2_LACLM	sp|A2RLF5|RF2_LACLM	10	8	11	12	9	10	9	12	11	3	6	4	17	17	17	53.4	53.4	53.4	41.546	0	90.762	611160000	240	22834000	35725000	18535000	38722000	21104000	34891000	28739000	28480000	31072000	30569000	13575000	32465000	sp|A2RLF5|RF2_LACLMPeptidechainreleasefactor2OS=Lactococcuslactissubsp.cremoris(strainMG1363)GN=prfBPE=3SV=1	sp|A2RLF5|RF2_LACLMPeptidechainreleasefactor2OS=Lactococcuslactissubsp.cremoris(strainMG1363)GN=prfBPE=3SV=1
sp|A2RLF8|Y1550_LACLM	sp|A2RLF8|Y1550_LACLM	6	8	8	3	2	3	6	7	5	2	2	4	11	11	11	55.7	55.7	55.7	21.357	0	28.647	51375000	217	7282300	8445300	6902900	4892800	7556800	15290000	6240100	9892600	4748200	6145000	5709900	7768200	sp|A2RLF8|Y1550_LACLMUPF0374proteinllmg_1550OS=Lactococcuslactissubsp.cremoris(strainMG1363)GN=llmg_1550PE=3SV=1	sp|A2RLF8|Y1550_LACLMUPF0374proteinllmg_1550OS=Lactococcuslactissubsp.cremoris(strainMG1363)GN=llmg_1550PE=3SV=1
sp|A2RLG3|WHIA_LACLM	sp|A2RLG3|WHIA_LACLM	2	2	0	1	2	3	2	2	3	3	2	2	7	7	7	25.6	25.6	25.6	34.547	0	20.732	7100400	15	0	0	0	0	0	0	3077400	1974400	1443700	2388100	1985400	2909800	sp|A2RLG3|WHIA_LACLMPutativesporulationtranscriptionregulatorWhiAOS=Lactococcuslactissubsp.cremoris(strainMG1363)GN=whiAPE=3SV=1	sp|A2RLG3|WHIA_LACLMPutativesporulationtranscriptionregulatorWhiAOS=Lactococcuslactissubsp.cremoris(strainMG1363)GN=whiAPE=3SV=1
sp|A2RLG5|Y1557_LACLM	sp|A2RLG5|Y1557_LACLM	11	15	7	7	9	8	8	9	7	11	10	9	18	18	18	59	59	59	33.644	0	193.26	196180000	204	30040000	25374000	24133000	26501000	23662000	46757000	35707000	26669000	24384000	24510000	18546000	17227000	sp|A2RLG5|Y1557_LACLMNucleotide-bindingproteinllmg_1557OS=Lactococcuslactissubsp.cremoris(strainMG1363)GN=llmg_1557PE=3SV=1	sp|A2RLG5|Y1557_LACLMNucleotide-bindingproteinllmg_1557OS=Lactococcuslactissubsp.cremoris(strainMG1363)GN=llmg_1557PE=3SV=1
sp|A2RLI8|Y1581_LACLM	sp|A2RLI8|Y1581_LACLM	15	14	10	13	11	16	10	14	12	12	9	10	20	20	20	50.1	50.1	50.1	46.774	0	95.844	461220000	382	57187000	26464000	83506000	49609000	63043000	49787000	55785000	38484000	33944000	49470000	38342000	87908000	sp|A2RLI8|Y1581_LACLMUPF0210proteinllmg_1581OS=Lactococcuslactissubsp.cremoris(strainMG1363)GN=llmg_1581PE=3SV=1	sp|A2RLI8|Y1581_LACLMUPF0210proteinllmg_1581OS=Lactococcuslactissubsp.cremoris(strainMG1363)GN=llmg_1581PE=3SV=1
sp|A2RLK1|FTHS_LACLM	sp|A2RLK1|FTHS_LACLM	17	17	11	11	12	15	17	18	13	8	9	9	23	23	23	41.6	41.6	41.6	59.515	0	164.9	528330000	265	21194000	25478000	22758000	28094000	18899000	25410000	25072000	24096000	22853000	29242000	16418000	17137000	sp|A2RLK1|FTHS_LACLMFormate--tetrahydrofolateligaseOS=Lactococcuslactissubsp.cremoris(strainMG1363)GN=fhsPE=3SV=1	sp|A2RLK1|FTHS_LACLMFormate--tetrahydrofolateligaseOS=Lactococcuslactissubsp.cremoris(strainMG1363)GN=fhsPE=3SV=1
sp|A2RLK2|Y1596_LACLM	sp|A2RLK2|Y1596_LACLM	4	2	3	4	3	5	5	3	3	4	4	4	5	5	5	61.1	61.1	61.1	11.829	0	237.84	104040000	283	11621000	25138000	10536000	20144000	29383000	40677000	32507000	30438000	30885000	28691000	29115000	36607000	sp|A2RLK2|Y1596_LACLMUPF0145proteinllmg_1596OS=Lactococcuslactissubsp.cremoris(strainMG1363)GN=llmg_1596PE=3SV=1	sp|A2RLK2|Y1596_LACLMUPF0145proteinllmg_1596OS=Lactococcuslactissubsp.cremoris(strainMG1363)GN=llmg_1596PE=3SV=1
sp|A2RLS5|RL19_LACLM	sp|A2RLS5|RL19_LACLM	14	15	15	12	12	14	13	13	11	13	11	11	17	17	17	78.9	78.9	78.9	13.101	0	323.31	14155000000	6647	1207800000	1570900000	1621000000	2091900000	2413700000	1501100000	1734800000	1739900000	1607500000	1779400000	1575100000	1729400000	sp|A2RLS5|RL19_LACLM50SribosomalproteinL19OS=Lactococcuslactissubsp.cremoris(strainMG1363)GN=rplSPE=3SV=1	sp|A2RLS5|RL19_LACLM50SribosomalproteinL19OS=Lactococcuslactissubsp.cremoris(strainMG1363)GN=rplSPE=3SV=1
sp|A2RLT1|MRAY_LACLM	sp|A2RLT1|MRAY_LACLM	2	3	2	2	1	2	2	2	1	3	2	2	4	4	4	7.9	7.9	7.9	36.221	0	16.441	114340000	107	4813500	5836700	3280200	894460	0	6339300	3575500	11588000	0	17990000	20209000	24026000	sp|A2RLT1|MRAY_LACLMPhospho-N-acetylmuramoyl-pentapeptide-transferaseOS=Lactococcuslactissubsp.cremoris(strainMG1363)GN=mraYPE=3SV=1	sp|A2RLT1|MRAY_LACLMPhospho-N-acetylmuramoyl-pentapeptide-transferaseOS=Lactococcuslactissubsp.cremoris(strainMG1363)GN=mraYPE=3SV=1
sp|A2RLT4|RSMH_LACLM	sp|A2RLT4|RSMH_LACLM	5	8	5	7	6	10	5	9	7	6	6	6	12	12	12	53	53	53	36.05	0	114.85	160530000	146	11369000	13529000	13530000	20583000	23036000	35711000	25111000	22516000	23142000	25436000	16876000	22519000	sp|A2RLT4|RSMH_LACLMRibosomalRNAsmallsubunitmethyltransferaseHOS=Lactococcuslactissubsp.cremoris(strainMG1363)GN=rsmHPE=3SV=1	sp|A2RLT4|RSMH_LACLMRibosomalRNAsmallsubunitmethyltransferaseHOS=Lactococcuslactissubsp.cremoris(strainMG1363)GN=rsmHPE=3SV=1
sp|A2RLU3|EX7S_LACLM	sp|A2RLU3|EX7S_LACLM	3	1	3	1	2	2	1	1	1	2	2	1	4	4	4	59.5	59.5	59.5	8.9659	0	15.78	27661000	52	7170900	0	6139000	0	1912700	1801700	0	0	0	0	3750000	0	sp|A2RLU3|EX7S_LACLMExodeoxyribonuclease7smallsubunitOS=Lactococcuslactissubsp.cremoris(strainMG1363)GN=xseBPE=3SV=1	sp|A2RLU3|EX7S_LACLMExodeoxyribonuclease7smallsubunitOS=Lactococcuslactissubsp.cremoris(strainMG1363)GN=xseBPE=3SV=1
sp|A2RLU4|EX7L_LACLM	sp|A2RLU4|EX7L_LACLM	12	10	6	6	4	4	6	6	6	3	7	5	16	16	16	37.4	37.4	37.4	47.149	0	52.726	403910000	70	6990900	6332100	7343200	4592800	4639400	3353900	3613200	5460700	5495800	2344300	2679700	4527500	sp|A2RLU4|EX7L_LACLMExodeoxyribonuclease7largesubunitOS=Lactococcuslactissubsp.cremoris(strainMG1363)GN=xseAPE=3SV=1	sp|A2RLU4|EX7L_LACLMExodeoxyribonuclease7largesubunitOS=Lactococcuslactissubsp.cremoris(strainMG1363)GN=xseAPE=3SV=1
sp|A2RLU5|FOLD_LACLM	sp|A2RLU5|FOLD_LACLM	7	9	5	8	5	10	7	8	6	5	4	4	14	14	14	59.3	59.3	59.3	31.165	0	75.187	216390000	134	20345000	34551000	24586000	33148000	27571000	17172000	17582000	22050000	30626000	52054000	29651000	36771000	sp|A2RLU5|FOLD_LACLMBifunctionalproteinFolDOS=Lactococcuslactissubsp.cremoris(strainMG1363)GN=folDPE=3SV=1	sp|A2RLU5|FOLD_LACLMBifunctionalproteinFolDOS=Lactococcuslactissubsp.cremoris(strainMG1363)GN=folDPE=3SV=1
sp|A2RLV5|ACPS_LACLM	sp|A2RLV5|ACPS_LACLM	4	0	4	4	2	4	5	4	5	5	5	5	5	5	5	37	37	37	13.414	0	142.64	20032000	107	3457400	0	2313800	3909900	3139200	8170300	3253600	6673600	4154200	3701500	3024100	3664400	sp|A2RLV5|ACPS_LACLMHolo-[acyl-carrier-protein]synthaseOS=Lactococcuslactissubsp.cremoris(strainMG1363)GN=acpSPE=3SV=1	sp|A2RLV5|ACPS_LACLMHolo-[acyl-carrier-protein]synthaseOS=Lactococcuslactissubsp.cremoris(strainMG1363)GN=acpSPE=3SV=1
sp|A2RLW6|UVRC_LACLM	sp|A2RLW6|UVRC_LACLM	19	20	17	10	8	8	9	13	10	8	10	8	26	26	26	42.8	42.8	42.8	76.432	0	72.787	803130000	166	25068000	15902000	11175000	7298500	9147300	13142000	14219000	10896000	9306100	11357000	9559600	11584000	sp|A2RLW6|UVRC_LACLMUvrABCsystemproteinCOS=Lactococcuslactissubsp.cremoris(strainMG1363)GN=uvrCPE=3SV=1	sp|A2RLW6|UVRC_LACLMUvrABCsystemproteinCOS=Lactococcuslactissubsp.cremoris(strainMG1363)GN=uvrCPE=3SV=1
sp|A2RLX1|MNMA_LACLM	sp|A2RLX1|MNMA_LACLM	14	15	13	11	13	11	9	12	8	9	10	6	17	17	17	62	62	62	41.979	0	163.92	1732600000	394	80915000	79662000	51949000	32846000	36964000	42378000	30953000	28886000	31323000	39342000	43838000	13503000	sp|A2RLX1|MNMA_LACLMtRNA-specific2-thiouridylaseMnmAOS=Lactococcuslactissubsp.cremoris(strainMG1363)GN=mnmAPE=3SV=2	sp|A2RLX1|MNMA_LACLMtRNA-specific2-thiouridylaseMnmAOS=Lactococcuslactissubsp.cremoris(strainMG1363)GN=mnmAPE=3SV=2
sp|A2RLY6|SYL_LACLM	sp|A2RLY6|SYL_LACLM	40	39	39	34	33	38	36	33	34	38	29	33	48	48	48	65.7	65.7	65.7	93.789	0	323.31	5290000000	2675	843610000	963130000	732810000	451490000	417640000	599960000	627570000	379450000	526770000	387160000	359450000	285160000	sp|A2RLY6|SYL_LACLMLeucine--tRNAligaseOS=Lactococcuslactissubsp.cremoris(strainMG1363)GN=leuSPE=3SV=1	sp|A2RLY6|SYL_LACLMLeucine--tRNAligaseOS=Lactococcuslactissubsp.cremoris(strainMG1363)GN=leuSPE=3SV=1
sp|A2RLZ8|RNC_LACLM	sp|A2RLZ8|RNC_LACLM	8	4	7	4	2	3	2	4	2	3	3	3	10	10	10	40.7	40.7	40.7	26.184	0	57.51	2103200000	75	40483000	93444000	71153000	78710000	31097000	18956000	61159000	54989000	74650000	50424000	47996000	52689000	sp|A2RLZ8|RNC_LACLMRibonuclease3OS=Lactococcuslactissubsp.cremoris(strainMG1363)GN=rncPE=3SV=1	sp|A2RLZ8|RNC_LACLMRibonuclease3OS=Lactococcuslactissubsp.cremoris(strainMG1363)GN=rncPE=3SV=1
sp|A2RM00|ARGB_LACLM	sp|A2RM00|ARGB_LACLM	0	0	0	3	3	4	4	3	1	6	6	5	7	7	7	26.5	26.5	26.5	30.688	0	11.396	4939600	22	0	0	0	2329400	3121000	2357900	1786500	1831700	0	2191200	1315300	2753900	sp|A2RM00|ARGB_LACLMAcetylglutamatekinaseOS=Lactococcuslactissubsp.cremoris(strainMG1363)GN=argBPE=3SV=1	sp|A2RM00|ARGB_LACLMAcetylglutamatekinaseOS=Lactococcuslactissubsp.cremoris(strainMG1363)GN=argBPE=3SV=1
sp|A2RM21|METC_LACLM	sp|A2RM21|METC_LACLM	8	13	6	9	10	9	6	9	8	9	8	8	16	16	16	56.6	56.6	56.6	40.937	0	171.41	374680000	190	27919000	32471000	41994000	65584000	52980000	31233000	35685000	45335000	59045000	42732000	46856000	33355000	sp|A2RM21|METC_LACLMCystathioninebeta-lyaseOS=Lactococcuslactissubsp.cremoris(strainMG1363)GN=metCPE=1SV=1	sp|A2RM21|METC_LACLMCystathioninebeta-lyaseOS=Lactococcuslactissubsp.cremoris(strainMG1363)GN=metCPE=1SV=1
sp|A2RM23|ACCD_LACLM	sp|A2RM23|ACCD_LACLM	15	12	13	11	11	13	12	11	11	10	11	11	18	18	18	60.8	60.8	60.8	31.802	0	285.27	1391600000	705	224880000	212860000	174890000	128710000	232090000	171080000	100310000	106100000	174750000	129960000	151800000	151070000	sp|A2RM23|ACCD_LACLMAcetyl-coenzymeAcarboxylasecarboxyltransferasesubunitbetaOS=Lactococcuslactissubsp.cremoris(strainMG1363)GN=accDPE=3SV=1	sp|A2RM23|ACCD_LACLMAcetyl-coenzymeAcarboxylasecarboxyltransferasesubunitbetaOS=Lactococcuslactissubsp.cremoris(strainMG1363)GN=accDPE=3SV=1
sp|A2RM26|FABZ_LACLM	sp|A2RM26|FABZ_LACLM	9	9	9	8	9	7	9	9	7	7	8	7	10	10	10	61.1	61.1	61.1	15.923	0	115.3	776860000	1863	79533000	107980000	104740000	109790000	140900000	198080000	157160000	124930000	126410000	101880000	166340000	104370000	sp|A2RM26|FABZ_LACLM3-hydroxyacyl-[acyl-carrier-protein]dehydrataseFabZOS=Lactococcuslactissubsp.cremoris(strainMG1363)GN=fabZPE=3SV=1	sp|A2RM26|FABZ_LACLM3-hydroxyacyl-[acyl-carrier-protein]dehydrataseFabZOS=Lactococcuslactissubsp.cremoris(strainMG1363)GN=fabZPE=3SV=1
sp|A2RM31|ACP_LACLM	sp|A2RM31|ACP_LACLM	3	3	3	3	3	3	3	3	3	3	3	3	3	3	3	27.4	27.4	27.4	8.4012	0	83.827	4770100000	777	231560000	380220000	320590000	634520000	917270000	1049100000	1054700000	1088700000	691230000	479080000	673260000	542590000	sp|A2RM31|ACP_LACLMAcylcarrierproteinOS=Lactococcuslactissubsp.cremoris(strainMG1363)GN=acpPPE=3SV=1	sp|A2RM31|ACP_LACLMAcylcarrierproteinOS=Lactococcuslactissubsp.cremoris(strainMG1363)GN=acpPPE=3SV=1
sp|A2RM32|FABH_LACLM	sp|A2RM32|FABH_LACLM	13	13	9	9	11	9	9	10	9	8	9	7	14	14	14	63.7	63.7	63.7	34.876	0	201.39	507710000	289	32351000	73462000	44356000	92264000	52176000	49360000	42006000	66197000	78295000	44614000	58550000	31699000	sp|A2RM32|FABH_LACLM3-oxoacyl-[acyl-carrier-protein]synthase3OS=Lactococcuslactissubsp.cremoris(strainMG1363)GN=fabHPE=3SV=1	sp|A2RM32|FABH_LACLM3-oxoacyl-[acyl-carrier-protein]synthase3OS=Lactococcuslactissubsp.cremoris(strainMG1363)GN=fabHPE=3SV=1
sp|A2RM36|RBFA_LACLM	sp|A2RM36|RBFA_LACLM	8	6	8	7	8	10	7	9	7	7	7	7	10	10	10	72.3	72.3	72.3	13.417	0	78.289	467450000	392	87725000	97597000	93349000	153470000	94856000	88224000	69411000	90258000	103060000	90228000	159960000	174740000	sp|A2RM36|RBFA_LACLMRibosome-bindingfactorAOS=Lactococcuslactissubsp.cremoris(strainMG1363)GN=rbfAPE=3SV=1	sp|A2RM36|RBFA_LACLMRibosome-bindingfactorAOS=Lactococcuslactissubsp.cremoris(strainMG1363)GN=rbfAPE=3SV=1
sp|A2RM37|IF2_LACLM	sp|A2RM37|IF2_LACLM	52	57	52	57	63	54	57	56	60	60	53	54	81	81	81	76	76	76	104.58	0	323.31	13195000000	8068	1550700000	1588000000	2042900000	1474600000	2331300000	1703900000	1678900000	1929600000	1740600000	1936100000	1137700000	1568300000	sp|A2RM37|IF2_LACLMTranslationinitiationfactorIF-2OS=Lactococcuslactissubsp.cremoris(strainMG1363)GN=infBPE=3SV=1	sp|A2RM37|IF2_LACLMTranslationinitiationfactorIF-2OS=Lactococcuslactissubsp.cremoris(strainMG1363)GN=infBPE=3SV=1
sp|A2RM41|RIMP_LACLM	sp|A2RM41|RIMP_LACLM	3	2	3	2	2	2	1	1	1	2	3	3	6	6	6	37.6	37.6	37.6	17.552	0	21.378	73325000	82	0	0	0	0	0	0	0	0	0	8483900	5996500	10681000	sp|A2RM41|RIMP_LACLMRibosomematurationfactorRimPOS=Lactococcuslactissubsp.cremoris(strainMG1363)GN=rimPPE=3SV=1	sp|A2RM41|RIMP_LACLMRibosomematurationfactorRimPOS=Lactococcuslactissubsp.cremoris(strainMG1363)GN=rimPPE=3SV=1
sp|A2RM49|DER_LACLM	sp|A2RM49|DER_LACLM	23	22	19	14	17	17	14	17	15	10	14	12	26	26	26	70.9	70.9	70.9	48.909	0	230.56	3107700000	544	151470000	145760000	135090000	101190000	195350000	180100000	165690000	115790000	145600000	146720000	132550000	137100000	sp|A2RM49|DER_LACLMGTPaseDerOS=Lactococcuslactissubsp.cremoris(strainMG1363)GN=derPE=3SV=1	sp|A2RM49|DER_LACLMGTPaseDerOS=Lactococcuslactissubsp.cremoris(strainMG1363)GN=derPE=3SV=1
sp|A2RM54|NRDR_LACLM	sp|A2RM54|NRDR_LACLM	9	10	7	6	5	6	7	7	6	6	6	6	10	10	10	60.1	60.1	60.1	17.374	0	184.28	537200000	395	24538000	57855000	42553000	85039000	105370000	133230000	109280000	101770000	95642000	115150000	157430000	80996000	sp|A2RM54|NRDR_LACLMTranscriptionalrepressorNrdROS=Lactococcuslactissubsp.cremoris(strainMG1363)GN=nrdRPE=3SV=1	sp|A2RM54|NRDR_LACLMTranscriptionalrepressorNrdROS=Lactococcuslactissubsp.cremoris(strainMG1363)GN=nrdRPE=3SV=1
sp|A2RM55|TRMB_LACLM	sp|A2RM55|TRMB_LACLM	4	2	3	4	3	4	6	6	5	3	2	5	8	8	8	58.5	58.5	58.5	24.947	0	34.337	150760000	154	10099000	5259600	14429000	9170300	7637500	7443700	12252000	5245400	5408600	10941000	0	5214500	sp|A2RM55|TRMB_LACLMtRNA(guanine-N(7)-)-methyltransferaseOS=Lactococcuslactissubsp.cremoris(strainMG1363)GN=trmBPE=3SV=1	sp|A2RM55|TRMB_LACLMtRNA(guanine-N(7)-)-methyltransferaseOS=Lactococcuslactissubsp.cremoris(strainMG1363)GN=trmBPE=3SV=1
sp|A2RM59|RL9_LACLM	sp|A2RM59|RL9_LACLM	16	14	14	15	14	14	16	16	10	11	15	14	22	22	22	88	88	88	16.352	0	302.92	6136000000	1412	469210000	670160000	511590000	583460000	686750000	615540000	440760000	519500000	560890000	475150000	633590000	702470000	sp|A2RM59|RL9_LACLM50SribosomalproteinL9OS=Lactococcuslactissubsp.cremoris(strainMG1363)GN=rplIPE=3SV=1	sp|A2RM59|RL9_LACLM50SribosomalproteinL9OS=Lactococcuslactissubsp.cremoris(strainMG1363)GN=rplIPE=3SV=1
sp|A2RM73|MEND_LACLM	sp|A2RM73|MEND_LACLM	14	15	12	11	8	10	12	12	10	6	7	7	19	19	19	43.7	43.7	43.7	62.05	0	280.8	952770000	236	32811000	31549000	22601000	42053000	22981000	30754000	41275000	29420000	21438000	36893000	18000000	23436000	sp|A2RM73|MEND_LACLM2-succinyl-5-enolpyruvyl-6-hydroxy-3-cyclohexene-1-carboxylatesynthaseOS=Lactococcuslactissubsp.cremoris(strainMG1363)GN=menDPE=3SV=1	sp|A2RM73|MEND_LACLM2-succinyl-5-enolpyruvyl-6-hydroxy-3-cyclohexene-1-carboxylatesynthaseOS=Lactococcuslactissubsp.cremoris(strainMG1363)GN=menDPE=3SV=1
sp|A2RMA8|DTPT_LACLM	sp|A2RMA8|DTPT_LACLM	2	2	2	2	2	2	2	2	2	2	3	2	3	3	3	4.6	4.6	4.6	54.79	0	3.7959	110220000	191	9965200	5837700	12917000	7004000	17118000	8829800	5982400	13751000	6990600	14010000	26833000	25440000	sp|A2RMA8|DTPT_LACLMDi-/tripeptidetransporterOS=Lactococcuslactissubsp.cremoris(strainMG1363)GN=dtpTPE=3SV=1	sp|A2RMA8|DTPT_LACLMDi-/tripeptidetransporterOS=Lactococcuslactissubsp.cremoris(strainMG1363)GN=dtpTPE=3SV=1
sp|A2RMC2|EFP_LACLM	sp|A2RMC2|EFP_LACLM	8	8	7	7	8	8	8	8	9	7	7	7	9	9	9	64.9	64.9	64.9	20.739	0	316.93	2008500000	1653	100580000	148890000	146400000	72891000	90085000	137450000	209480000	162230000	157430000	155930000	113920000	164310000	sp|A2RMC2|EFP_LACLMElongationfactorPOS=Lactococcuslactissubsp.cremoris(strainMG1363)GN=efpPE=3SV=1	sp|A2RMC2|EFP_LACLMElongationfactorPOS=Lactococcuslactissubsp.cremoris(strainMG1363)GN=efpPE=3SV=1
sp|A2RME2|SSRP_LACLM	sp|A2RME2|SSRP_LACLM	0	5	3	5	1	2	2	2	2	2	1	2	7	7	7	43.2	43.2	43.2	17.934	0	63.247	22924000	53	0	5543200	6243600	2846600	0	8698100	0	0	0	5846400	0	0	sp|A2RME2|SSRP_LACLMSsrA-bindingproteinOS=Lactococcuslactissubsp.cremoris(strainMG1363)GN=smpBPE=3SV=1	sp|A2RME2|SSRP_LACLMSsrA-bindingproteinOS=Lactococcuslactissubsp.cremoris(strainMG1363)GN=smpBPE=3SV=1
sp|A2RME6|SYA_LACLM	sp|A2RME6|SYA_LACLM	56	59	56	62	61	64	63	62	63	62	59	58	73	73	73	81.5	81.5	81.5	96.307	0	323.31	14576000000	7400	1553300000	1756500000	2007600000	2118200000	2479500000	2072600000	2236500000	2235100000	2092000000	1279400000	2191600000	1764600000	sp|A2RME6|SYA_LACLMAlanine--tRNAligaseOS=Lactococcuslactissubsp.cremoris(strainMG1363)GN=alaSPE=3SV=1	sp|A2RME6|SYA_LACLMAlanine--tRNAligaseOS=Lactococcuslactissubsp.cremoris(strainMG1363)GN=alaSPE=3SV=1
sp|A2RMG0|RS20_LACLM	sp|A2RMG0|RS20_LACLM	5	4	5	6	7	5	6	7	5	4	4	4	7	7	7	54.5	54.5	54.5	8.3666	0	50.747	761620000	822	163300000	23106000	252530000	172600000	65495000	61418000	40008000	149270000	57731000	61355000	59100000	75790000	sp|A2RMG0|RS20_LACLM30SribosomalproteinS20OS=Lactococcuslactissubsp.cremoris(strainMG1363)GN=rpsTPE=3SV=1	sp|A2RMG0|RS20_LACLM30SribosomalproteinS20OS=Lactococcuslactissubsp.cremoris(strainMG1363)GN=rpsTPE=3SV=1
sp|A2RMH2|AROC_LACLM	sp|A2RMH2|AROC_LACLM	16	21	10	15	12	11	15	15	15	13	13	12	24	24	24	59	59	59	42.683	0	323.31	1106100000	474	53163000	64901000	52787000	82446000	39623000	132850000	64792000	70840000	56651000	57995000	47291000	43481000	sp|A2RMH2|AROC_LACLMChorismatesynthaseOS=Lactococcuslactissubsp.cremoris(strainMG1363)GN=aroCPE=3SV=1	sp|A2RMH2|AROC_LACLMChorismatesynthaseOS=Lactococcuslactissubsp.cremoris(strainMG1363)GN=aroCPE=3SV=1
sp|A2RMH3|Y1936_LACLM	sp|A2RMH3|Y1936_LACLM	7	5	8	9	7	5	9	9	10	7	6	9	12	12	12	61.3	61.3	61.3	23.191	0	191.62	136230000	183	9251900	13880000	12940000	17276000	19134000	18033000	19383000	15592000	17565000	18611000	17577000	16150000	sp|A2RMH3|Y1936_LACLMUPF0637proteinllmg_1936OS=Lactococcuslactissubsp.cremoris(strainMG1363)GN=llmg_1936PE=3SV=1	sp|A2RMH3|Y1936_LACLMUPF0637proteinllmg_1936OS=Lactococcuslactissubsp.cremoris(strainMG1363)GN=llmg_1936PE=3SV=1
sp|A2RMH5|AROB_LACLM	sp|A2RMH5|AROB_LACLM	12	15	7	11	9	8	11	11	8	8	8	8	18	18	18	40.4	40.4	40.4	39.265	0	204.76	218360000	200	24053000	18916000	18807000	16557000	18358000	26642000	18644000	16912000	20958000	23665000	15863000	24205000	sp|A2RMH5|AROB_LACLM3-dehydroquinatesynthaseOS=Lactococcuslactissubsp.cremoris(strainMG1363)GN=aroBPE=3SV=1	sp|A2RMH5|AROB_LACLM3-dehydroquinatesynthaseOS=Lactococcuslactissubsp.cremoris(strainMG1363)GN=aroBPE=3SV=1
sp|A2RMH6|AROE_LACLM	sp|A2RMH6|AROE_LACLM	7	9	6	6	5	6	11	9	8	8	7	7	14	14	14	51.4	51.4	51.4	31.135	0	85.873	130100000	98	18967000	15036000	23944000	13486000	15665000	5212800	11683000	12485000	14343000	12648000	13011000	11050000	sp|A2RMH6|AROE_LACLMShikimatedehydrogenase(NADP(+))OS=Lactococcuslactissubsp.cremoris(strainMG1363)GN=aroEPE=3SV=1	sp|A2RMH6|AROE_LACLMShikimatedehydrogenase(NADP(+))OS=Lactococcuslactissubsp.cremoris(strainMG1363)GN=aroEPE=3SV=1
sp|A2RMI2|ATPB_LACLM	sp|A2RMI2|ATPB_LACLM	36	34	31	29	31	30	29	30	28	26	28	22	37	37	37	87.2	87.2	87.2	50.866	0	323.31	15492000000	2729	581100000	570040000	671130000	675340000	754570000	1127600000	899130000	708150000	760880000	929420000	879350000	753470000	sp|A2RMI2|ATPB_LACLMATPsynthasesubunitbetaOS=Lactococcuslactissubsp.cremoris(strainMG1363)GN=atpDPE=3SV=2	sp|A2RMI2|ATPB_LACLMATPsynthasesubunitbetaOS=Lactococcuslactissubsp.cremoris(strainMG1363)GN=atpDPE=3SV=2
sp|A2RMI4|ATPA_LACLM	sp|A2RMI4|ATPA_LACLM	27	28	25	23	24	25	25	26	25	20	25	23	33	33	33	67.6	67.6	67.6	54.309	0	323.31	11219000000	1642	464370000	504240000	481740000	428230000	539020000	670940000	453100000	428700000	438900000	610830000	550770000	634000000	sp|A2RMI4|ATPA_LACLMATPsynthasesubunitalphaOS=Lactococcuslactissubsp.cremoris(strainMG1363)GN=atpAPE=3SV=1	sp|A2RMI4|ATPA_LACLMATPsynthasesubunitalphaOS=Lactococcuslactissubsp.cremoris(strainMG1363)GN=atpAPE=3SV=1
sp|A2RMI5|ATPD_LACLM	sp|A2RMI5|ATPD_LACLM	10	11	10	10	10	7	13	12	10	12	11	13	14	14	14	83.4	83.4	83.4	19.225	0	323.31	662430000	508	113310000	161280000	94174000	80283000	81139000	137240000	156020000	91741000	95616000	90941000	149710000	95610000	sp|A2RMI5|ATPD_LACLMATPsynthasesubunitdeltaOS=Lactococcuslactissubsp.cremoris(strainMG1363)GN=atpHPE=3SV=1	sp|A2RMI5|ATPD_LACLMATPsynthasesubunitdeltaOS=Lactococcuslactissubsp.cremoris(strainMG1363)GN=atpHPE=3SV=1
sp|A2RML8|RPOC_LACLM	sp|A2RML8|RPOC_LACLM	83	87	90	93	94	87	95	92	91	101	87	87	118	118	118	78.2	78.2	78.2	134.77	0	323.31	30531000000	14881	4425300000	4732000000	3946200000	4790700000	5235200000	3594400000	4344600000	4981300000	3991900000	4914200000	5049500000	4286600000	sp|A2RML8|RPOC_LACLMDNA-directedRNApolymerasesubunitbeta'OS=Lactococcuslactissubsp.cremoris(strainMG1363)GN=rpoCPE=3SV=1	sp|A2RML8|RPOC_LACLMDNA-directedRNApolymerasesubunitbeta'OS=Lactococcuslactissubsp.cremoris(strainMG1363)GN=rpoCPE=3SV=1
sp|A2RML9|RPOB_LACLM	sp|A2RML9|RPOB_LACLM	68	73	76	76	74	75	76	75	74	80	72	68	92	92	92	79.8	79.8	79.8	133.17	0	323.31	27045000000	11992	3971200000	4380700000	4498000000	4091800000	4534700000	3855600000	4236500000	3992200000	4708100000	5095200000	3746600000	3806100000	sp|A2RML9|RPOB_LACLMDNA-directedRNApolymerasesubunitbetaOS=Lactococcuslactissubsp.cremoris(strainMG1363)GN=rpoBPE=3SV=1	sp|A2RML9|RPOB_LACLMDNA-directedRNApolymerasesubunitbetaOS=Lactococcuslactissubsp.cremoris(strainMG1363)GN=rpoBPE=3SV=1
sp|A2RMM5|MURE_LACLM	sp|A2RMM5|MURE_LACLM	23	23	16	17	16	18	15	19	17	11	15	11	31	31	31	67.9	67.9	67.9	54.113	0	323.31	1465500000	329	40582000	43736000	57707000	50699000	61086000	46124000	47272000	55125000	54984000	55792000	45086000	60072000	sp|A2RMM5|MURE_LACLMUDP-N-acetylmuramyl-tripeptidesynthetaseOS=Lactococcuslactissubsp.cremoris(strainMG1363)GN=murEPE=3SV=1	sp|A2RMM5|MURE_LACLMUDP-N-acetylmuramyl-tripeptidesynthetaseOS=Lactococcuslactissubsp.cremoris(strainMG1363)GN=murEPE=3SV=1
sp|A2RMN0|PEPT_LACLM	sp|A2RMN0|PEPT_LACLM	27	27	23	20	20	22	21	22	20	16	20	17	30	30	30	68.8	68.8	68.8	45.945	0	323.31	7504700000	1045	229820000	236860000	252580000	169180000	208730000	310830000	257270000	162710000	131520000	151860000	179290000	156980000	sp|A2RMN0|PEPT_LACLMPeptidaseTOS=Lactococcuslactissubsp.cremoris(strainMG1363)GN=pepTPE=3SV=1	sp|A2RMN0|PEPT_LACLMPeptidaseTOS=Lactococcuslactissubsp.cremoris(strainMG1363)GN=pepTPE=3SV=1
sp|A2RMQ1|SYN_LACLM	sp|A2RMQ1|SYN_LACLM	32	31	25	24	23	22	22	27	23	20	23	21	35	35	35	64.9	64.9	64.9	50.931	0	323.31	9501500000	1371	427980000	458340000	395420000	300420000	369150000	438960000	304760000	269200000	261630000	222970000	360910000	252220000	sp|A2RMQ1|SYN_LACLMAsparagine--tRNAligaseOS=Lactococcuslactissubsp.cremoris(strainMG1363)GN=asnSPE=3SV=1	sp|A2RMQ1|SYN_LACLMAsparagine--tRNAligaseOS=Lactococcuslactissubsp.cremoris(strainMG1363)GN=asnSPE=3SV=1
sp|A2RMR1|RL20_LACLM	sp|A2RMR1|RL20_LACLM	9	9	8	10	9	8	9	10	8	8	8	7	10	10	10	52.1	52.1	52.1	13.693	0	323.31	19168000000	3528	2055700000	3109400000	2574800000	5180000000	10565000000	7189100000	8909200000	4839000000	4258200000	5786800000	6777600000	4281600000	sp|A2RMR1|RL20_LACLM50SribosomalproteinL20OS=Lactococcuslactissubsp.cremoris(strainMG1363)GN=rplTPE=3SV=1	sp|A2RMR1|RL20_LACLM50SribosomalproteinL20OS=Lactococcuslactissubsp.cremoris(strainMG1363)GN=rplTPE=3SV=1
sp|A2RMR2|RL35_LACLM	sp|A2RMR2|RL35_LACLM	3	2	2	1	1	1	2	1	2	0	2	2	3	3	3	33.3	33.3	33.3	7.8182	0	3.6351	528130000	74	146270000	41914000	131130000	0	0	0	28652000	0	32919000	0	10734000	33301000	sp|A2RMR2|RL35_LACLM50SribosomalproteinL35OS=Lactococcuslactissubsp.cremoris(strainMG1363)GN=rpmIPE=3SV=1	sp|A2RMR2|RL35_LACLM50SribosomalproteinL35OS=Lactococcuslactissubsp.cremoris(strainMG1363)GN=rpmIPE=3SV=1
sp|A2RMS1|SYC_LACLM	sp|A2RMS1|SYC_LACLM	20	20	14	16	14	11	14	17	16	11	14	12	24	24	24	58.7	58.7	58.7	50.995	0	216.62	1355800000	335	49733000	41892000	37655000	41361000	41601000	29509000	39571000	39548000	38175000	44369000	33847000	36395000	sp|A2RMS1|SYC_LACLMCysteine--tRNAligaseOS=Lactococcuslactissubsp.cremoris(strainMG1363)GN=cysSPE=3SV=1	sp|A2RMS1|SYC_LACLMCysteine--tRNAligaseOS=Lactococcuslactissubsp.cremoris(strainMG1363)GN=cysSPE=3SV=1
sp|A2RMS5|PNP_LACLM	sp|A2RMS5|PNP_LACLM	48	51	41	36	34	37	35	34	33	27	33	26	54	54	54	76.5	76.5	76.5	83.919	0	323.31	22394000000	1799	707880000	644980000	559870000	890330000	523480000	397650000	508010000	407170000	462280000	490970000	709430000	390150000	sp|A2RMS5|PNP_LACLMPolyribonucleotidenucleotidyltransferaseOS=Lactococcuslactissubsp.cremoris(strainMG1363)GN=pnpPE=3SV=1	sp|A2RMS5|PNP_LACLMPolyribonucleotidenucleotidyltransferaseOS=Lactococcuslactissubsp.cremoris(strainMG1363)GN=pnpPE=3SV=1
sp|A2RMT1|EFTU_LACLM	sp|A2RMT1|EFTU_LACLM	41	41	35	32	34	34	32	34	34	30	32	31	41	41	41	95.7	95.7	95.7	43.211	0	323.31	337380000000	29977	41323000000	32430000000	19921000000	21837000000	24077000000	37666000000	20579000000	17462000000	14391000000	12092000000	13405000000	13844000000	sp|A2RMT1|EFTU_LACLMElongationfactorTuOS=Lactococcuslactissubsp.cremoris(strainMG1363)GN=tufPE=3SV=1	sp|A2RMT1|EFTU_LACLMElongationfactorTuOS=Lactococcuslactissubsp.cremoris(strainMG1363)GN=tufPE=3SV=1
sp|A2RMV7|GLMU_LACLM	sp|A2RMV7|GLMU_LACLM	20	21	17	18	17	16	18	19	17	14	16	15	21	21	21	58.5	58.5	58.5	49.121	0	323.31	4552700000	887	205070000	186810000	228620000	148410000	187970000	148690000	145140000	171110000	147010000	167580000	180390000	149500000	sp|A2RMV7|GLMU_LACLMBifunctionalproteinGlmUOS=Lactococcuslactissubsp.cremoris(strainMG1363)GN=glmUPE=3SV=1	sp|A2RMV7|GLMU_LACLMBifunctionalproteinGlmUOS=Lactococcuslactissubsp.cremoris(strainMG1363)GN=glmUPE=3SV=1
sp|A2RMV9|RS15_LACLM	sp|A2RMV9|RS15_LACLM	7	4	8	8	7	7	7	7	5	6	8	4	9	9	9	64	64	64	10.343	0	76.449	778720000	1667	173550000	32361000	114960000	519290000	222930000	195460000	394190000	100950000	186090000	299580000	384330000	176350000	sp|A2RMV9|RS15_LACLM30SribosomalproteinS15OS=Lactococcuslactissubsp.cremoris(strainMG1363)GN=rpsOPE=3SV=2	sp|A2RMV9|RS15_LACLM30SribosomalproteinS15OS=Lactococcuslactissubsp.cremoris(strainMG1363)GN=rpsOPE=3SV=2
sp|A2RN27|FMT_LACLM	sp|A2RN27|FMT_LACLM	18	18	11	15	10	15	10	16	13	10	13	12	22	22	22	76.5	76.5	76.5	35.584	0	323.31	630390000	631	60432000	57998000	132190000	58367000	52481000	160470000	113250000	51286000	51559000	55765000	29643000	47178000	sp|A2RN27|FMT_LACLMMethionyl-tRNAformyltransferaseOS=Lactococcuslactissubsp.cremoris(strainMG1363)GN=fmtPE=3SV=1	sp|A2RN27|FMT_LACLMMethionyl-tRNAformyltransferaseOS=Lactococcuslactissubsp.cremoris(strainMG1363)GN=fmtPE=3SV=1
sp|A2RN34|RPOZ_LACLM	sp|A2RN34|RPOZ_LACLM	8	7	10	8	9	6	6	5	6	6	7	4	12	12	12	66.7	66.7	66.7	13.432	0	323.31	397430000	368	22673000	38752000	48801000	38223000	42848000	22922000	20482000	23610000	21401000	30228000	24839000	15440000	sp|A2RN34|RPOZ_LACLMDNA-directedRNApolymerasesubunitomegaOS=Lactococcuslactissubsp.cremoris(strainMG1363)GN=rpoZPE=3SV=1	sp|A2RN34|RPOZ_LACLMDNA-directedRNApolymerasesubunitomegaOS=Lactococcuslactissubsp.cremoris(strainMG1363)GN=rpoZPE=3SV=1
sp|A2RN36|RNY_LACLM	sp|A2RN36|RNY_LACLM	41	37	33	23	24	24	26	26	25	19	24	24	48	48	48	72.5	72.5	72.5	60.309	0	323.31	8756200000	1211	199210000	118890000	177470000	106520000	167700000	145940000	113730000	114050000	90338000	140170000	90117000	184390000	sp|A2RN36|RNY_LACLMRibonucleaseYOS=Lactococcuslactissubsp.cremoris(strainMG1363)GN=rnyPE=3SV=1	sp|A2RN36|RNY_LACLMRibonucleaseYOS=Lactococcuslactissubsp.cremoris(strainMG1363)GN=rnyPE=3SV=1
sp|A2RN40|METK_LACLM	sp|A2RN40|METK_LACLM	23	23	23	20	18	17	17	19	17	16	15	14	25	25	25	54.9	54.9	54.9	42.973	0	323.31	10162000000	1225	389250000	380180000	489530000	377240000	187440000	401240000	315430000	348810000	360690000	295070000	291720000	232220000	sp|A2RN40|METK_LACLMS-adenosylmethioninesynthaseOS=Lactococcuslactissubsp.cremoris(strainMG1363)GN=metKPE=3SV=1;tr|A2RN39|A2RN39_LACLMUncharacterizedproteinOS=Lactococcuslactissubsp.cremoris(strainMG1363)GN=llmg_2159PE=4SV=1;tr|A2RN38|A2RN38_LACLMUncharacterizedproteinOS=Lactococcuslactissubsp.cremoris(strainMG1363)GN=llmg_2158PE=4SV=1	sp|A2RN40|METK_LACLMS-adenosylmethioninesynthaseOS=Lactococcuslactissubsp.cremoris(strainMG1363)GN=metKPE=3SV=1
sp|A2RN48|SYT_LACLM	sp|A2RN48|SYT_LACLM	32	37	33	26	26	23	29	27	30	23	31	23	40	40	40	73.2	73.2	73.2	74.16	0	323.31	26682000000	2151	635700000	634410000	846780000	678940000	664260000	617030000	710280000	632140000	600090000	777100000	763040000	712180000	sp|A2RN48|SYT_LACLMThreonine--tRNAligaseOS=Lactococcuslactissubsp.cremoris(strainMG1363)GN=thrSPE=3SV=1	sp|A2RN48|SYT_LACLMThreonine--tRNAligaseOS=Lactococcuslactissubsp.cremoris(strainMG1363)GN=thrSPE=3SV=1
sp|A2RN75|SYFA_LACLM	sp|A2RN75|SYFA_LACLM	10	12	10	10	12	12	7	9	8	6	9	6	15	15	15	47.8	47.8	47.8	39.23	0	79.876	780550000	301	83466000	58567000	82228000	54287000	94919000	47291000	40785000	36512000	43251000	42355000	54785000	67696000	sp|A2RN75|SYFA_LACLMPhenylalanine--tRNAligasealphasubunitOS=Lactococcuslactissubsp.cremoris(strainMG1363)GN=pheSPE=3SV=1	sp|A2RN75|SYFA_LACLMPhenylalanine--tRNAligasealphasubunitOS=Lactococcuslactissubsp.cremoris(strainMG1363)GN=pheSPE=3SV=1
sp|A2RN80|PURA_LACLM	sp|A2RN80|PURA_LACLM	25	25	20	19	15	14	15	20	20	14	18	14	31	31	31	71.4	71.4	71.4	47.352	0	323.31	2943100000	609	174350000	185530000	220930000	227120000	182290000	164990000	179450000	184160000	207860000	124310000	202940000	197900000	sp|A2RN80|PURA_LACLMAdenylosuccinatesynthetaseOS=Lactococcuslactissubsp.cremoris(strainMG1363)GN=purAPE=3SV=1	sp|A2RN80|PURA_LACLMAdenylosuccinatesynthetaseOS=Lactococcuslactissubsp.cremoris(strainMG1363)GN=purAPE=3SV=1
sp|A2RN83|HSLO_LACLM	sp|A2RN83|HSLO_LACLM	7	10	7	10	10	8	7	9	8	8	8	8	11	11	11	45.8	45.8	45.8	31.73	0	155.73	532820000	271	46780000	36154000	59731000	36876000	35382000	64152000	64754000	37097000	35918000	32880000	25750000	31082000	sp|A2RN83|HSLO_LACLM33kDachaperoninOS=Lactococcuslactissubsp.cremoris(strainMG1363)GN=hslOPE=3SV=1	sp|A2RN83|HSLO_LACLM33kDachaperoninOS=Lactococcuslactissubsp.cremoris(strainMG1363)GN=hslOPE=3SV=1
sp|A2RN94|SYD_LACLM	sp|A2RN94|SYD_LACLM	39	41	34	31	33	30	32	30	30	29	33	24	45	45	45	79.3	79.3	79.3	66.528	0	323.31	17971000000	1887	607920000	565500000	434320000	491240000	516100000	659800000	685800000	562270000	484960000	477100000	606560000	476050000	sp|A2RN94|SYD_LACLMAspartate--tRNAligaseOS=Lactococcuslactissubsp.cremoris(strainMG1363)GN=aspSPE=3SV=1	sp|A2RN94|SYD_LACLMAspartate--tRNAligaseOS=Lactococcuslactissubsp.cremoris(strainMG1363)GN=aspSPE=3SV=1
sp|A2RN96|SYH_LACLM	sp|A2RN96|SYH_LACLM	24	21	19	20	20	19	19	22	20	16	19	14	28	28	28	71.9	71.9	71.9	48.984	0	316.84	3821200000	582	140450000	149610000	189160000	154640000	162620000	87486000	149250000	138690000	144500000	181940000	167300000	180230000	sp|A2RN96|SYH_LACLMHistidine--tRNAligaseOS=Lactococcuslactissubsp.cremoris(strainMG1363)GN=hisSPE=3SV=1	sp|A2RN96|SYH_LACLMHistidine--tRNAligaseOS=Lactococcuslactissubsp.cremoris(strainMG1363)GN=hisSPE=3SV=1
sp|A2RNA8|RECF_LACLM	sp|A2RNA8|RECF_LACLM	5	5	3	4	4	3	2	2	2	3	2	2	7	7	7	18.9	18.9	18.9	41.64	0	5.1531	29062000	25	1745900	1725700	2178400	2196600	2060800	1178800	1482100	2084600	2256900	1585900	1563300	1706900	sp|A2RNA8|RECF_LACLMDNAreplicationandrepairproteinRecFOS=Lactococcuslactissubsp.cremoris(strainMG1363)GN=recFPE=3SV=1	sp|A2RNA8|RECF_LACLMDNAreplicationandrepairproteinRecFOS=Lactococcuslactissubsp.cremoris(strainMG1363)GN=recFPE=3SV=1
sp|A2RNF3|RL1_LACLM	sp|A2RNF3|RL1_LACLM	20	15	16	15	16	17	16	16	16	16	14	14	20	20	20	82.1	82.1	82.1	23.949	0	323.31	30424000000	9762	3590700000	1492800000	2513200000	2309200000	3072800000	2463800000	2031300000	1638100000	1503800000	1609800000	1699300000	1637900000	sp|A2RNF3|RL1_LACLM50SribosomalproteinL1OS=Lactococcuslactissubsp.cremoris(strainMG1363)GN=rplAPE=3SV=1	sp|A2RNF3|RL1_LACLM50SribosomalproteinL1OS=Lactococcuslactissubsp.cremoris(strainMG1363)GN=rplAPE=3SV=1
sp|A2RNF4|RL11_LACLM	sp|A2RNF4|RL11_LACLM	11	12	12	13	14	14	12	12	12	11	11	11	14	14	14	85.1	85.1	85.1	14.689	0	323.31	31568000000	3964	1682900000	3859200000	3312000000	1307000000	1877700000	1531400000	1773400000	1629600000	1183400000	1262100000	917110000	472880000	sp|A2RNF4|RL11_LACLM50SribosomalproteinL11OS=Lactococcuslactissubsp.cremoris(strainMG1363)GN=rplKPE=3SV=1	sp|A2RNF4|RL11_LACLM50SribosomalproteinL11OS=Lactococcuslactissubsp.cremoris(strainMG1363)GN=rplKPE=3SV=1
sp|A2RNG1|RRF_LACLM	sp|A2RNG1|RRF_LACLM	19	20	20	15	18	14	19	21	17	16	16	16	23	23	23	84.3	84.3	84.3	20.786	0	260.92	5057900000	1341	305620000	518190000	573620000	466970000	431060000	460630000	265240000	338160000	265360000	387700000	417970000	352770000	sp|A2RNG1|RRF_LACLMRibosome-recyclingfactorOS=Lactococcuslactissubsp.cremoris(strainMG1363)GN=frrPE=3SV=1	sp|A2RNG1|RRF_LACLMRibosome-recyclingfactorOS=Lactococcuslactissubsp.cremoris(strainMG1363)GN=frrPE=3SV=1
sp|A2RNH9|DPO4_LACLM	sp|A2RNH9|DPO4_LACLM	2	2	2	2	1	1	0	0	0	1	2	1	5	5	5	18.4	18.4	18.4	40.623	0	91.413	69721000	12	3168100	0	2790200	2178000	0	0	0	0	0	0	0	0	sp|A2RNH9|DPO4_LACLMDNApolymeraseIVOS=Lactococcuslactissubsp.cremoris(strainMG1363)GN=dinBPE=3SV=1	sp|A2RNH9|DPO4_LACLMDNApolymeraseIVOS=Lactococcuslactissubsp.cremoris(strainMG1363)GN=dinBPE=3SV=1
sp|A2RNI8|SYR_LACLM	sp|A2RNI8|SYR_LACLM	54	55	52	48	46	44	43	42	41	32	44	33	58	58	58	88.1	88.1	88.1	62.876	0	323.31	70045000000	4777	1775600000	1518700000	1665900000	1501300000	1501200000	1289300000	1425200000	1530300000	1395400000	993020000	1255900000	1799300000	sp|A2RNI8|SYR_LACLMArginine--tRNAligaseOS=Lactococcuslactissubsp.cremoris(strainMG1363)GN=argSPE=3SV=1	sp|A2RNI8|SYR_LACLMArginine--tRNAligaseOS=Lactococcuslactissubsp.cremoris(strainMG1363)GN=argSPE=3SV=1
sp|A2RNI9|ARGR_LACLM	sp|A2RNI9|ARGR_LACLM	4	5	4	5	8	9	7	7	7	7	7	7	10	10	10	56.6	56.6	56.6	16.919	0	160.44	155230000	237	28827000	19760000	20270000	5231400	14523000	24505000	19564000	23044000	19036000	15280000	13581000	16628000	sp|A2RNI9|ARGR_LACLMArgininerepressorOS=Lactococcuslactissubsp.cremoris(strainMG1363)GN=argRPE=3SV=1	sp|A2RNI9|ARGR_LACLMArgininerepressorOS=Lactococcuslactissubsp.cremoris(strainMG1363)GN=argRPE=3SV=1
sp|A2RNJ0|MURC_LACLM	sp|A2RNJ0|MURC_LACLM	25	25	15	17	16	20	14	16	15	9	14	10	28	28	28	76.7	76.7	76.7	49.95	0	323.31	3241000000	878	91699000	99415000	95458000	111540000	103010000	154020000	131250000	130550000	125140000	80893000	93056000	84290000	sp|A2RNJ0|MURC_LACLMUDP-N-acetylmuramate--L-alanineligaseOS=Lactococcuslactissubsp.cremoris(strainMG1363)GN=murCPE=3SV=1	sp|A2RNJ0|MURC_LACLMUDP-N-acetylmuramate--L-alanineligaseOS=Lactococcuslactissubsp.cremoris(strainMG1363)GN=murCPE=3SV=1
sp|A2RNK1|PEPX_LACLM	sp|A2RNK1|PEPX_LACLM	43	43	34	31	19	21	27	26	26	19	27	16	53	53	53	57.7	57.7	57.7	87.696	0	323.31	6050400000	802	165410000	132410000	116380000	141590000	95664000	111480000	87264000	91437000	99923000	93983000	112450000	56232000	sp|A2RNK1|PEPX_LACLMXaa-Prodipeptidyl-peptidaseOS=Lactococcuslactissubsp.cremoris(strainMG1363)GN=pepXPE=3SV=1	sp|A2RNK1|PEPX_LACLMXaa-Prodipeptidyl-peptidaseOS=Lactococcuslactissubsp.cremoris(strainMG1363)GN=pepXPE=3SV=1
sp|A2RNK5|SYE_LACLM	sp|A2RNK5|SYE_LACLM	31	32	33	29	26	26	27	28	25	17	22	18	35	35	35	71.6	71.6	71.6	55.355	0	323.31	15810000000	1654	400770000	754220000	836200000	573780000	326490000	355730000	456660000	315190000	249470000	352590000	441120000	335070000	sp|A2RNK5|SYE_LACLMGlutamate--tRNAligaseOS=Lactococcuslactissubsp.cremoris(strainMG1363)GN=gltXPE=3SV=1	sp|A2RNK5|SYE_LACLMGlutamate--tRNAligaseOS=Lactococcuslactissubsp.cremoris(strainMG1363)GN=gltXPE=3SV=1
sp|A2RNM6|RL17_LACLM	sp|A2RNM6|RL17_LACLM	12	11	11	11	11	10	11	12	10	8	8	7	12	12	12	69.8	69.8	69.8	14.255	0	323.31	26882000000	6586	6361200000	5530800000	5628000000	5449500000	4441700000	5268100000	4649500000	4910600000	3788500000	3718700000	4704500000	2689500000	sp|A2RNM6|RL17_LACLM50SribosomalproteinL17OS=Lactococcuslactissubsp.cremoris(strainMG1363)GN=rplQPE=3SV=1	sp|A2RNM6|RL17_LACLM50SribosomalproteinL17OS=Lactococcuslactissubsp.cremoris(strainMG1363)GN=rplQPE=3SV=1
sp|A2RNM7|RPOA_LACLM	sp|A2RNM7|RPOA_LACLM	26	29	23	25	23	24	19	22	21	19	19	16	34	34	34	95.8	95.8	95.8	34.18	0	323.31	9545500000	2076	474450000	661530000	653660000	1102900000	861250000	650750000	593480000	889760000	928930000	671410000	925440000	801580000	sp|A2RNM7|RPOA_LACLMDNA-directedRNApolymerasesubunitalphaOS=Lactococcuslactissubsp.cremoris(strainMG1363)GN=rpoAPE=3SV=1	sp|A2RNM7|RPOA_LACLMDNA-directedRNApolymerasesubunitalphaOS=Lactococcuslactissubsp.cremoris(strainMG1363)GN=rpoAPE=3SV=1
sp|A2RNM8|RS11_LACLM	sp|A2RNM8|RS11_LACLM	6	6	4	4	4	5	4	4	4	4	4	4	6	6	6	50.4	50.4	50.4	13.287	0	89.286	15671000000	3294	955640000	930230000	1138500000	1512700000	3875300000	2190900000	2175000000	4769500000	2820200000	1711900000	1989100000	3790100000	sp|A2RNM8|RS11_LACLM30SribosomalproteinS11OS=Lactococcuslactissubsp.cremoris(strainMG1363)GN=rpsKPE=3SV=1	sp|A2RNM8|RS11_LACLM30SribosomalproteinS11OS=Lactococcuslactissubsp.cremoris(strainMG1363)GN=rpsKPE=3SV=1
sp|A2RNM9|RS13_LACLM	sp|A2RNM9|RS13_LACLM	17	18	17	16	16	16	17	18	17	17	17	15	20	20	20	79.3	79.3	79.3	13.491	0	302.09	19979000000	11423	2266700000	2810500000	2866700000	1367300000	3238700000	1461400000	1455000000	2296100000	1854300000	1847300000	1853100000	1147000000	sp|A2RNM9|RS13_LACLM30SribosomalproteinS13OS=Lactococcuslactissubsp.cremoris(strainMG1363)GN=rpsMPE=3SV=1	sp|A2RNM9|RS13_LACLM30SribosomalproteinS13OS=Lactococcuslactissubsp.cremoris(strainMG1363)GN=rpsMPE=3SV=1
sp|A2RNN1|IF1_LACLM	sp|A2RNN1|IF1_LACLM	4	3	4	4	4	4	3	3	4	4	4	4	4	4	4	40.3	40.3	40.3	8.1954	0	54.065	171400000	461	26523000	46547000	36522000	14268000	10233000	35460000	10505000	7361500	13408000	11113000	20135000	20551000	sp|A2RNN1|IF1_LACLMTranslationinitiationfactorIF-1OS=Lactococcuslactissubsp.cremoris(strainMG1363)GN=infAPE=3SV=1	sp|A2RNN1|IF1_LACLMTranslationinitiationfactorIF-1OS=Lactococcuslactissubsp.cremoris(strainMG1363)GN=infAPE=3SV=1
sp|A2RNN2|KAD_LACLM	sp|A2RNN2|KAD_LACLM	14	14	14	14	12	12	14	15	11	11	9	12	18	18	18	80	80	80	23.675	0	323.31	3200200000	1003	333470000	318060000	274510000	161060000	280430000	233970000	192980000	140450000	139450000	224640000	187320000	147170000	sp|A2RNN2|KAD_LACLMAdenylatekinaseOS=Lactococcuslactissubsp.cremoris(strainMG1363)GN=adkPE=3SV=1	sp|A2RNN2|KAD_LACLMAdenylatekinaseOS=Lactococcuslactissubsp.cremoris(strainMG1363)GN=adkPE=3SV=1
sp|A2RNN4|RL15_LACLM	sp|A2RNN4|RL15_LACLM	13	13	13	12	12	13	14	14	11	12	11	10	17	17	17	69.4	69.4	69.4	15.348	0	323.31	13429000000	9883	1084100000	1428900000	1202600000	2701100000	2469500000	2840200000	2729400000	2227500000	2131500000	2338000000	2093200000	1670300000	sp|A2RNN4|RL15_LACLM50SribosomalproteinL15OS=Lactococcuslactissubsp.cremoris(strainMG1363)GN=rplOPE=3SV=1	sp|A2RNN4|RL15_LACLM50SribosomalproteinL15OS=Lactococcuslactissubsp.cremoris(strainMG1363)GN=rplOPE=3SV=1
sp|A2RNN5|RL30_LACLM	sp|A2RNN5|RL30_LACLM	4	3	3	3	2	3	3	5	4	3	3	3	6	6	6	74.6	74.6	74.6	6.1933	0	119.36	3045100000	228	599330000	799110000	692630000	68073000	37706000	255200000	101690000	230250000	164690000	127290000	242600000	211070000	sp|A2RNN5|RL30_LACLM50SribosomalproteinL30OS=Lactococcuslactissubsp.cremoris(strainMG1363)GN=rpmDPE=3SV=1	sp|A2RNN5|RL30_LACLM50SribosomalproteinL30OS=Lactococcuslactissubsp.cremoris(strainMG1363)GN=rpmDPE=3SV=1
sp|A2RNN6|RS5_LACLM	sp|A2RNN6|RS5_LACLM	20	20	19	19	19	19	20	20	19	18	19	19	22	22	22	86.3	86.3	86.3	17.582	0	323.31	42136000000	13987	4262900000	5750000000	3645900000	5424800000	8893200000	3801400000	4080500000	3283900000	3288700000	4198800000	4306600000	4214400000	sp|A2RNN6|RS5_LACLM30SribosomalproteinS5OS=Lactococcuslactissubsp.cremoris(strainMG1363)GN=rpsEPE=3SV=1	sp|A2RNN6|RS5_LACLM30SribosomalproteinS5OS=Lactococcuslactissubsp.cremoris(strainMG1363)GN=rpsEPE=3SV=1
sp|A2RNN7|RL18_LACLM	sp|A2RNN7|RL18_LACLM	13	11	13	12	14	16	14	12	11	11	10	11	16	16	16	86.1	86.1	86.1	12.404	0	263.28	36204000000	3127	9374200000	6755800000	7154300000	6621700000	10444000000	9373600000	8139600000	8250100000	5093700000	4248800000	6780800000	7822000000	sp|A2RNN7|RL18_LACLM50SribosomalproteinL18OS=Lactococcuslactissubsp.cremoris(strainMG1363)GN=rplRPE=3SV=1	sp|A2RNN7|RL18_LACLM50SribosomalproteinL18OS=Lactococcuslactissubsp.cremoris(strainMG1363)GN=rplRPE=3SV=1
sp|A2RNN8|RL6_LACLM	sp|A2RNN8|RL6_LACLM	16	15	13	14	15	14	14	13	13	12	13	12	18	18	18	88.8	88.8	88.8	19.284	0	323.31	12136000000	7216	1733100000	2472300000	2029200000	1819400000	1709100000	1101400000	2937700000	1607200000	1502800000	1258400000	1303000000	1884300000	sp|A2RNN8|RL6_LACLM50SribosomalproteinL6OS=Lactococcuslactissubsp.cremoris(strainMG1363)GN=rplFPE=3SV=1	sp|A2RNN8|RL6_LACLM50SribosomalproteinL6OS=Lactococcuslactissubsp.cremoris(strainMG1363)GN=rplFPE=3SV=1
sp|A2RNN9|RS8_LACLM	sp|A2RNN9|RS8_LACLM	19	19	17	16	16	19	17	13	13	14	13	11	22	22	22	90.2	90.2	90.2	14.67	0	323.31	28078000000	6256	2568300000	2674300000	3248900000	1776700000	2013900000	2782700000	2287200000	2445000000	1834500000	2375900000	1765300000	1530100000	sp|A2RNN9|RS8_LACLM30SribosomalproteinS8OS=Lactococcuslactissubsp.cremoris(strainMG1363)GN=rpsHPE=3SV=1	sp|A2RNN9|RS8_LACLM30SribosomalproteinS8OS=Lactococcuslactissubsp.cremoris(strainMG1363)GN=rpsHPE=3SV=1
sp|A2RNP2|RS14Z_LACLM	sp|A2RNP2|RS14Z_LACLM	4	2	3	2	3	2	2	4	3	2	2	2	4	4	4	34.4	34.4	34.4	7.1345	0	5.821	1370000000	295	358110000	59758000	342230000	211690000	102910000	216620000	79478000	145340000	164010000	159250000	243790000	379410000	sp|A2RNP2|RS14Z_LACLM30SribosomalproteinS14typeZOS=Lactococcuslactissubsp.cremoris(strainMG1363)GN=rpsZPE=3SV=1	sp|A2RNP2|RS14Z_LACLM30SribosomalproteinS14typeZOS=Lactococcuslactissubsp.cremoris(strainMG1363)GN=rpsZPE=3SV=1
sp|A2RNP3|RL5_LACLM	sp|A2RNP3|RL5_LACLM	23	23	20	20	20	20	20	20	18	18	19	18	24	24	24	95.6	95.6	95.6	20.006	0	323.31	21609000000	11166	3242400000	5631700000	3835100000	2295200000	2263400000	2317700000	2298700000	1276300000	1366100000	797080000	1518400000	1570300000	sp|A2RNP3|RL5_LACLM50SribosomalproteinL5OS=Lactococcuslactissubsp.cremoris(strainMG1363)GN=rplEPE=3SV=1	sp|A2RNP3|RL5_LACLM50SribosomalproteinL5OS=Lactococcuslactissubsp.cremoris(strainMG1363)GN=rplEPE=3SV=1
sp|A2RNP4|RL24_LACLM	sp|A2RNP4|RL24_LACLM	4	3	3	5	4	6	5	5	4	3	5	3	8	8	8	66.3	66.3	66.3	10.877	0	17.467	326090000	531	36156000	96439000	59443000	61283000	135270000	29029000	40312000	112770000	69675000	50462000	84143000	114570000	sp|A2RNP4|RL24_LACLM50SribosomalproteinL24OS=Lactococcuslactissubsp.cremoris(strainMG1363)GN=rplXPE=3SV=1	sp|A2RNP4|RL24_LACLM50SribosomalproteinL24OS=Lactococcuslactissubsp.cremoris(strainMG1363)GN=rplXPE=3SV=1
sp|A2RNP5|RL14_LACLM	sp|A2RNP5|RL14_LACLM	16	16	16	12	14	15	13	12	12	11	11	11	18	18	18	92.6	92.6	92.6	12.922	0	151.7	24392000000	5451	4029300000	3297000000	2589200000	3611900000	5779300000	5214000000	3739800000	3277000000	3006500000	2135800000	3492800000	3580900000	sp|A2RNP5|RL14_LACLM50SribosomalproteinL14OS=Lactococcuslactissubsp.cremoris(strainMG1363)GN=rplNPE=3SV=1	sp|A2RNP5|RL14_LACLM50SribosomalproteinL14OS=Lactococcuslactissubsp.cremoris(strainMG1363)GN=rplNPE=3SV=1
sp|A2RNP6|RS17_LACLM	sp|A2RNP6|RS17_LACLM	10	6	10	10	9	9	10	8	9	9	8	9	11	11	11	72.1	72.1	72.1	10.144	0	54.744	4949400000	3730	1409900000	557070000	1108600000	1100600000	895910000	529520000	623170000	564030000	685960000	503240000	776180000	945240000	sp|A2RNP6|RS17_LACLM30SribosomalproteinS17OS=Lactococcuslactissubsp.cremoris(strainMG1363)GN=rpsQPE=3SV=1	sp|A2RNP6|RS17_LACLM30SribosomalproteinS17OS=Lactococcuslactissubsp.cremoris(strainMG1363)GN=rpsQPE=3SV=1
sp|A2RNP7|RL29_LACLM	sp|A2RNP7|RL29_LACLM	7	4	6	6	8	5	7	7	6	4	4	3	8	8	8	76.8	76.8	76.8	7.8591	0	51.746	1016500000	348	289710000	64667000	183980000	135400000	89646000	39403000	25750000	72303000	42457000	25576000	79362000	49174000	sp|A2RNP7|RL29_LACLM50SribosomalproteinL29OS=Lactococcuslactissubsp.cremoris(strainMG1363)GN=rpmCPE=3SV=1	sp|A2RNP7|RL29_LACLM50SribosomalproteinL29OS=Lactococcuslactissubsp.cremoris(strainMG1363)GN=rpmCPE=3SV=1
sp|A2RNP8|RL16_LACLM	sp|A2RNP8|RL16_LACLM	7	7	8	7	7	6	7	7	5	4	6	6	8	8	8	49.6	49.6	49.6	15.343	0	105.54	9486300000	5794	937660000	904260000	1402100000	1355700000	507690000	240430000	513250000	670930000	619110000	538990000	208780000	160670000	sp|A2RNP8|RL16_LACLM50SribosomalproteinL16OS=Lactococcuslactissubsp.cremoris(strainMG1363)GN=rplPPE=3SV=1	sp|A2RNP8|RL16_LACLM50SribosomalproteinL16OS=Lactococcuslactissubsp.cremoris(strainMG1363)GN=rplPPE=3SV=1
sp|A2RNP9|RS3_LACLM	sp|A2RNP9|RS3_LACLM	18	16	17	18	17	18	21	18	17	16	16	15	22	22	22	75.1	75.1	75.1	24.017	0	323.31	24627000000	11936	2469100000	1547700000	2029700000	1829900000	1378700000	1574700000	2300500000	1563400000	2025500000	1281600000	1371900000	2974100000	sp|A2RNP9|RS3_LACLM30SribosomalproteinS3OS=Lactococcuslactissubsp.cremoris(strainMG1363)GN=rpsCPE=3SV=1	sp|A2RNP9|RS3_LACLM30SribosomalproteinS3OS=Lactococcuslactissubsp.cremoris(strainMG1363)GN=rpsCPE=3SV=1
sp|A2RNQ0|RL22_LACLM	sp|A2RNQ0|RL22_LACLM	12	14	13	11	12	13	12	11	12	12	12	12	15	15	15	84.3	84.3	84.3	12.469	0	323.31	43978000000	7350	5071100000	6095000000	5633000000	10057000000	8094000000	12807000000	8696100000	9686100000	7039400000	6362100000	6784700000	4954700000	sp|A2RNQ0|RL22_LACLM50SribosomalproteinL22OS=Lactococcuslactissubsp.cremoris(strainMG1363)GN=rplVPE=3SV=1	sp|A2RNQ0|RL22_LACLM50SribosomalproteinL22OS=Lactococcuslactissubsp.cremoris(strainMG1363)GN=rplVPE=3SV=1
sp|A2RNQ1|RS19_LACLM	sp|A2RNQ1|RS19_LACLM	12	11	11	10	13	11	15	13	9	9	10	8	16	16	16	80.4	80.4	80.4	10.572	0	183.71	7214200000	2052	1195100000	1068500000	906500000	1075900000	1296600000	1421200000	962280000	1202000000	914780000	619870000	1216600000	999730000	sp|A2RNQ1|RS19_LACLM30SribosomalproteinS19OS=Lactococcuslactissubsp.cremoris(strainMG1363)GN=rpsSPE=3SV=1	sp|A2RNQ1|RS19_LACLM30SribosomalproteinS19OS=Lactococcuslactissubsp.cremoris(strainMG1363)GN=rpsSPE=3SV=1
sp|A2RNQ2|RL2_LACLM	sp|A2RNQ2|RL2_LACLM	19	18	19	13	15	18	15	15	15	14	16	16	25	25	25	75	75	75	29.59	0	323.31	34358000000	10896	8069400000	5683000000	3102800000	428680000	3397500000	3664900000	2379200000	2389000000	3331400000	1567500000	2220000000	3500700000	sp|A2RNQ2|RL2_LACLM50SribosomalproteinL2OS=Lactococcuslactissubsp.cremoris(strainMG1363)GN=rplBPE=3SV=1	sp|A2RNQ2|RL2_LACLM50SribosomalproteinL2OS=Lactococcuslactissubsp.cremoris(strainMG1363)GN=rplBPE=3SV=1
sp|A2RNQ4|RL4_LACLM	sp|A2RNQ4|RL4_LACLM	13	9	12	11	10	10	11	9	8	8	9	8	14	14	14	70.7	70.7	70.7	22.363	0	323.31	33481000000	8291	2709000000	3008800000	1738800000	6252100000	4850100000	8177500000	7612600000	4505900000	4833100000	5761100000	4522100000	4623400000	sp|A2RNQ4|RL4_LACLM50SribosomalproteinL4OS=Lactococcuslactissubsp.cremoris(strainMG1363)GN=rplDPE=3SV=1	sp|A2RNQ4|RL4_LACLM50SribosomalproteinL4OS=Lactococcuslactissubsp.cremoris(strainMG1363)GN=rplDPE=3SV=1
sp|A2RNQ5|RL3_LACLM	sp|A2RNQ5|RL3_LACLM	21	18	18	16	15	18	17	15	15	15	15	15	22	22	22	80.2	80.2	80.2	21.918	0	323.31	30973000000	6471	2649600000	3004300000	3707900000	3337900000	3027400000	3900300000	2653800000	2298800000	3370500000	1992800000	3215500000	2223700000	sp|A2RNQ5|RL3_LACLM50SribosomalproteinL3OS=Lactococcuslactissubsp.cremoris(strainMG1363)GN=rplCPE=3SV=1	sp|A2RNQ5|RL3_LACLM50SribosomalproteinL3OS=Lactococcuslactissubsp.cremoris(strainMG1363)GN=rplCPE=3SV=1
sp|A2RNQ6|RS10_LACLM	sp|A2RNQ6|RS10_LACLM	14	10	13	13	16	16	16	15	13	12	13	10	16	16	16	82.4	82.4	82.4	11.742	0	254.44	19192000000	3617	2201500000	3051200000	1682200000	3163600000	3730400000	4042300000	3130500000	4245400000	3078600000	3512500000	3661500000	3255600000	sp|A2RNQ6|RS10_LACLM30SribosomalproteinS10OS=Lactococcuslactissubsp.cremoris(strainMG1363)GN=rpsJPE=3SV=1	sp|A2RNQ6|RS10_LACLM30SribosomalproteinS10OS=Lactococcuslactissubsp.cremoris(strainMG1363)GN=rpsJPE=3SV=1
sp|A2RNQ7|MSCL_LACLM	sp|A2RNQ7|MSCL_LACLM	5	6	6	4	3	4	5	5	6	4	4	4	8	8	8	85.1	85.1	85.1	13.6	0	234.8	400280000	693	4949700	41680000	70854000	49741000	67952000	94023000	68520000	102440000	68681000	142690000	54080000	54456000	sp|A2RNQ7|MSCL_LACLMLarge-conductancemechanosensitivechannelOS=Lactococcuslactissubsp.cremoris(strainMG1363)GN=mscLPE=3SV=1	sp|A2RNQ7|MSCL_LACLMLarge-conductancemechanosensitivechannelOS=Lactococcuslactissubsp.cremoris(strainMG1363)GN=mscLPE=3SV=1
sp|A2RNS2|ZITR_LACLM	sp|A2RNS2|ZITR_LACLM	2	1	2	4	4	3	5	4	5	3	4	2	5	5	5	42.8	42.8	42.8	16.333	0	12.671	25010000	55	0	0	0	6843500	7318600	13621000	7816000	13689000	8246300	8925900	7690000	13149000	sp|A2RNS2|ZITR_LACLMTranscriptionalregulatorZitROS=Lactococcuslactissubsp.cremoris(strainMG1363)GN=zitRPE=1SV=1	sp|A2RNS2|ZITR_LACLMTranscriptionalregulatorZitROS=Lactococcuslactissubsp.cremoris(strainMG1363)GN=zitRPE=1SV=1
sp|A2RNT2|SYP_LACLM	sp|A2RNT2|SYP_LACLM	45	44	43	40	37	36	38	40	37	35	37	28	50	50	50	76.5	76.5	76.5	69.242	0	323.31	36599000000	3214	1128700000	1137800000	1027600000	1003600000	877600000	963700000	1045500000	924810000	811740000	996830000	1036600000	719300000	sp|A2RNT2|SYP_LACLMProline--tRNAligaseOS=Lactococcuslactissubsp.cremoris(strainMG1363)GN=proSPE=3SV=1	sp|A2RNT2|SYP_LACLMProline--tRNAligaseOS=Lactococcuslactissubsp.cremoris(strainMG1363)GN=proSPE=3SV=1
sp|A2RNT8|RLMH_LACLM	sp|A2RNT8|RLMH_LACLM	2	5	3	4	4	5	4	5	5	2	3	3	7	7	7	52.2	52.2	52.2	17.897	0	28.159	14301000	91	2232700	3616200	3283400	3566600	4188300	5779100	6247300	5360700	4227100	3550900	4496000	3929600	sp|A2RNT8|RLMH_LACLMRibosomalRNAlargesubunitmethyltransferaseHOS=Lactococcuslactissubsp.cremoris(strainMG1363)GN=rlmHPE=3SV=1	sp|A2RNT8|RLMH_LACLMRibosomalRNAlargesubunitmethyltransferaseHOS=Lactococcuslactissubsp.cremoris(strainMG1363)GN=rlmHPE=3SV=1
sp|A2RNT9|HTRA_LACLM	sp|A2RNT9|HTRA_LACLM	12	16	11	11	10	10	9	10	9	11	10	10	17	17	17	65.1	65.1	65.1	41.54	0	323.31	962200000	445	48159000	64245000	69285000	79079000	51679000	157730000	134970000	92318000	85691000	106160000	64203000	77970000	sp|A2RNT9|HTRA_LACLMSerineproteaseDo-likeHtrAOS=Lactococcuslactissubsp.cremoris(strainMG1363)GN=htrAPE=3SV=1	sp|A2RNT9|HTRA_LACLMSerineproteaseDo-likeHtrAOS=Lactococcuslactissubsp.cremoris(strainMG1363)GN=htrAPE=3SV=1
sp|A2RNU8|EZRA_LACLM	sp|A2RNU8|EZRA_LACLM	44	43	42	40	40	38	41	42	39	35	41	32	49	49	49	84.2	84.2	84.2	66.305	0	323.31	31712000000	2473	765870000	796230000	618870000	600290000	739720000	711210000	744570000	661280000	578770000	948630000	777860000	820500000	sp|A2RNU8|EZRA_LACLMSeptationringformationregulatorEzrAOS=Lactococcuslactissubsp.cremoris(strainMG1363)GN=ezrAPE=3SV=1	sp|A2RNU8|EZRA_LACLMSeptationringformationregulatorEzrAOS=Lactococcuslactissubsp.cremoris(strainMG1363)GN=ezrAPE=3SV=1
sp|A2RNU9|EFTS_LACLM	sp|A2RNU9|EFTS_LACLM	32	29	31	26	27	27	27	27	26	27	25	26	34	34	34	88	88	88	36.739	0	323.31	44010000000	7296	4669400000	3864400000	3497700000	3638400000	5022700000	6031000000	4755700000	3061200000	2986400000	4290600000	3199300000	4405700000	sp|A2RNU9|EFTS_LACLMElongationfactorTsOS=Lactococcuslactissubsp.cremoris(strainMG1363)GN=tsfPE=3SV=1	sp|A2RNU9|EFTS_LACLMElongationfactorTsOS=Lactococcuslactissubsp.cremoris(strainMG1363)GN=tsfPE=3SV=1
sp|A2RNV0|RS2_LACLM	sp|A2RNV0|RS2_LACLM	22	23	25	21	21	21	21	21	21	20	21	20	25	25	25	86.7	86.7	86.7	28.552	0	323.31	50056000000	11242	7040300000	5121500000	8512500000	4135600000	9382700000	8403000000	6057700000	5618400000	6674400000	8222600000	8362100000	6102000000	sp|A2RNV0|RS2_LACLM30SribosomalproteinS2OS=Lactococcuslactissubsp.cremoris(strainMG1363)GN=rpsBPE=3SV=1	sp|A2RNV0|RS2_LACLM30SribosomalproteinS2OS=Lactococcuslactissubsp.cremoris(strainMG1363)GN=rpsBPE=3SV=1
sp|A2RNW2|COAD_LACLM	sp|A2RNW2|COAD_LACLM	1	5	2	2	2	3	4	5	5	2	3	3	8	8	8	48.8	48.8	48.8	19.292	0	18.621	24359000	66	0	10485000	3058800	2384400	2401600	4523300	2134800	4247100	3132000	3834000	3694600	7730000	sp|A2RNW2|COAD_LACLMPhosphopantetheineadenylyltransferaseOS=Lactococcuslactissubsp.cremoris(strainMG1363)GN=coaDPE=3SV=1	sp|A2RNW2|COAD_LACLMPhosphopantetheineadenylyltransferaseOS=Lactococcuslactissubsp.cremoris(strainMG1363)GN=coaDPE=3SV=1
sp|A2RNW8|G6PI_LACLM	sp|A2RNW8|G6PI_LACLM	30	26	27	27	24	24	24	25	25	24	24	20	31	31	31	72.5	72.5	72.5	49.594	0	323.31	47339000000	2556	2266600000	2909200000	2743100000	2947600000	2497000000	2615500000	2650900000	2048300000	2811400000	1652200000	2609400000	1876500000	sp|A2RNW8|G6PI_LACLMGlucose-6-phosphateisomeraseOS=Lactococcuslactissubsp.cremoris(strainMG1363)GN=pgiPE=3SV=1	sp|A2RNW8|G6PI_LACLMGlucose-6-phosphateisomeraseOS=Lactococcuslactissubsp.cremoris(strainMG1363)GN=pgiPE=3SV=1
sp|A2RNY5|RECX_LACLM	sp|A2RNY5|RECX_LACLM	5	5	4	5	5	5	5	5	5	6	6	7	9	9	9	39.4	39.4	39.4	31.105	0	73.908	66431000	54	5169500	7852500	7245000	11060000	5692500	3638500	7088300	8155100	5634700	11209000	6625600	12161000	sp|A2RNY5|RECX_LACLMRegulatoryproteinRecXOS=Lactococcuslactissubsp.cremoris(strainMG1363)GN=recXPE=3SV=1	sp|A2RNY5|RECX_LACLMRegulatoryproteinRecXOS=Lactococcuslactissubsp.cremoris(strainMG1363)GN=recXPE=3SV=1
sp|A2RNZ2|RS18_LACLM	sp|A2RNZ2|RS18_LACLM	11	11	12	13	14	13	14	12	13	13	13	10	15	15	15	67.9	67.9	67.9	9.3709	0	103.17	13557000000	1679	1828100000	961780000	1417000000	1243100000	1235300000	1425300000	1281500000	1262500000	1223600000	1301000000	2039200000	1876000000	sp|A2RNZ2|RS18_LACLM30SribosomalproteinS18OS=Lactococcuslactissubsp.cremoris(strainMG1363)GN=rpsRPE=3SV=1	sp|A2RNZ2|RS18_LACLM30SribosomalproteinS18OS=Lactococcuslactissubsp.cremoris(strainMG1363)GN=rpsRPE=3SV=1
sp|A2RNZ4|RS6_LACLM	sp|A2RNZ4|RS6_LACLM	7	6	7	7	6	9	8	8	9	8	7	7	12	12	12	92.8	92.8	92.8	11.307	0	321.77	3574400000	1676	1142100000	496630000	1278400000	108310000	35168000	604450000	74194000	128980000	375280000	514230000	579530000	447450000	sp|A2RNZ4|RS6_LACLM30SribosomalproteinS6OS=Lactococcuslactissubsp.cremoris(strainMG1363)GN=rpsFPE=3SV=1	sp|A2RNZ4|RS6_LACLM30SribosomalproteinS6OS=Lactococcuslactissubsp.cremoris(strainMG1363)GN=rpsFPE=3SV=1
sp|A2RNZ5|UPPP_LACLM	sp|A2RNZ5|UPPP_LACLM	2	1	2	1	1	1	1	1	1	2	2	2	3	3	3	10.9	10.9	10.9	32.091	0.0033784	1.7923	32583000	37	0	0	0	0	0	0	0	0	0	4253800	3100300	4779100	sp|A2RNZ5|UPPP_LACLMUndecaprenyl-diphosphataseOS=Lactococcuslactissubsp.cremoris(strainMG1363)GN=uppPPE=3SV=1	sp|A2RNZ5|UPPP_LACLMUndecaprenyl-diphosphataseOS=Lactococcuslactissubsp.cremoris(strainMG1363)GN=uppPPE=3SV=1
sp|A2RP06|RUVB_LACLM	sp|A2RP06|RUVB_LACLM	4	5	2	5	3	3	2	3	3	1	3	2	8	8	8	24.6	24.6	24.6	37.661	0	24.022	35871000	44	3213900	2960600	7983200	6042000	0	4380500	3887700	4814700	5278900	0	3673700	7231900	sp|A2RP06|RUVB_LACLMHollidayjunctionATP-dependentDNAhelicaseRuvBOS=Lactococcuslactissubsp.cremoris(strainMG1363)GN=ruvBPE=3SV=1	sp|A2RP06|RUVB_LACLMHollidayjunctionATP-dependentDNAhelicaseRuvBOS=Lactococcuslactissubsp.cremoris(strainMG1363)GN=ruvBPE=3SV=1
sp|A2RP07|RUVA_LACLM	sp|A2RP07|RUVA_LACLM	5	6	3	3	4	4	6	5	7	4	4	5	7	7	7	45.7	45.7	45.7	21.209	0	167.58	178960000	156	24828000	27446000	11557000	31379000	33505000	34357000	63014000	59613000	64236000	38224000	34916000	52904000	sp|A2RP07|RUVA_LACLMHollidayjunctionATP-dependentDNAhelicaseRuvAOS=Lactococcuslactissubsp.cremoris(strainMG1363)GN=ruvAPE=3SV=1	sp|A2RP07|RUVA_LACLMHollidayjunctionATP-dependentDNAhelicaseRuvAOS=Lactococcuslactissubsp.cremoris(strainMG1363)GN=ruvAPE=3SV=1
sp|A2RP08|MUTL_LACLM	sp|A2RP08|MUTL_LACLM	22	23	15	9	9	10	12	11	12	6	8	7	29	29	29	57.3	57.3	57.3	73.797	0	240.73	812580000	208	30884000	30787000	31447000	32141000	29924000	26902000	35812000	30306000	31357000	38481000	25242000	42962000	sp|A2RP08|MUTL_LACLMDNAmismatchrepairproteinMutLOS=Lactococcuslactissubsp.cremoris(strainMG1363)GN=mutLPE=3SV=1	sp|A2RP08|MUTL_LACLMDNAmismatchrepairproteinMutLOS=Lactococcuslactissubsp.cremoris(strainMG1363)GN=mutLPE=3SV=1
sp|A2RP10|MUTS_LACLM	sp|A2RP10|MUTS_LACLM	12	20	8	22	23	19	19	14	25	5	19	21	39	39	39	58.3	58.3	58.3	94.299	0	223.33	774140000	294	74034000	33536000	49933000	66691000	69784000	43308000	66361000	47112000	63985000	7437900	65643000	70040000	sp|A2RP10|MUTS_LACLMDNAmismatchrepairproteinMutSOS=Lactococcuslactissubsp.cremoris(strainMG1363)GN=mutSPE=3SV=1	sp|A2RP10|MUTS_LACLMDNAmismatchrepairproteinMutSOS=Lactococcuslactissubsp.cremoris(strainMG1363)GN=mutSPE=3SV=1
sp|A2RP20|DNAJ_LACLM	sp|A2RP20|DNAJ_LACLM	18	17	16	13	10	15	12	12	13	12	12	11	21	21	21	43.3	43.3	43.3	40.686	0	323.31	1446700000	556	139610000	114300000	98674000	61391000	88869000	32927000	57113000	80168000	79304000	73335000	88621000	99076000	sp|A2RP20|DNAJ_LACLMChaperoneproteinDnaJOS=Lactococcuslactissubsp.cremoris(strainMG1363)GN=dnaJPE=3SV=1	sp|A2RP20|DNAJ_LACLMChaperoneproteinDnaJOS=Lactococcuslactissubsp.cremoris(strainMG1363)GN=dnaJPE=3SV=1
sp|A2RP28|RPIA_LACLM	sp|A2RP28|RPIA_LACLM	6	5	7	7	7	8	7	7	6	5	6	7	11	11	11	54	54	54	24.364	0	76.232	160540000	189	11603000	7107000	9374800	16070000	10082000	16548000	19980000	18397000	14744000	9787000	13091000	17931000	sp|A2RP28|RPIA_LACLMRibose-5-phosphateisomeraseAOS=Lactococcuslactissubsp.cremoris(strainMG1363)GN=rpiAPE=3SV=1	sp|A2RP28|RPIA_LACLMRibose-5-phosphateisomeraseAOS=Lactococcuslactissubsp.cremoris(strainMG1363)GN=rpiAPE=3SV=1
sp|A2RP37|MNME_LACLM	sp|A2RP37|MNME_LACLM	19	21	13	14	15	13	13	15	15	11	13	12	21	21	21	49.2	49.2	49.2	49.884	0	323.31	1899200000	321	61272000	69722000	66062000	46164000	80373000	49059000	76981000	58262000	82116000	107910000	60762000	74783000	sp|A2RP37|MNME_LACLMtRNAmodificationGTPaseMnmEOS=Lactococcuslactissubsp.cremoris(strainMG1363)GN=mnmEPE=3SV=1	sp|A2RP37|MNME_LACLMtRNAmodificationGTPaseMnmEOS=Lactococcuslactissubsp.cremoris(strainMG1363)GN=mnmEPE=3SV=1
sp|A2RP61|RS9_LACLM	sp|A2RP61|RS9_LACLM	11	10	7	6	6	5	5	6	6	5	6	6	11	11	11	73.1	73.1	73.1	14.098	0	83.308	12404000000	1924	1145800000	1161800000	1288200000	1122500000	889410000	1087300000	1449200000	814300000	725160000	585460000	683540000	513150000	sp|A2RP61|RS9_LACLM30SribosomalproteinS9OS=Lactococcuslactissubsp.cremoris(strainMG1363)GN=rpsIPE=3SV=1	sp|A2RP61|RS9_LACLM30SribosomalproteinS9OS=Lactococcuslactissubsp.cremoris(strainMG1363)GN=rpsIPE=3SV=1
sp|A2RP65|RNH3_LACLM	sp|A2RP65|RNH3_LACLM	4	6	2	4	3	2	2	2	3	2	2	2	8	8	8	33.9	33.9	33.9	32.007	0	21.225	16422000	56	2932900	2031700	2283700	2302000	1902400	1800600	1726800	2583300	2866600	1375200	1561200	2126500	sp|A2RP65|RNH3_LACLMRibonucleaseHIIIOS=Lactococcuslactissubsp.cremoris(strainMG1363)GN=rnhCPE=3SV=1	sp|A2RP65|RNH3_LACLMRibonucleaseHIIIOS=Lactococcuslactissubsp.cremoris(strainMG1363)GN=rnhCPE=3SV=1
sp|A2RP72|EFG_LACLM	sp|A2RP72|EFG_LACLM	50	49	51	50	48	45	48	49	48	46	48	41	53	53	53	84.2	84.2	84.2	77.971	0	323.31	218810000000	20983	6147000000	5779500000	6764300000	6633600000	5588400000	5598900000	5508900000	4401200000	4708800000	4799900000	5690500000	2788800000	sp|A2RP72|EFG_LACLMElongationfactorGOS=Lactococcuslactissubsp.cremoris(strainMG1363)GN=fusAPE=3SV=1	sp|A2RP72|EFG_LACLMElongationfactorGOS=Lactococcuslactissubsp.cremoris(strainMG1363)GN=fusAPE=3SV=1
sp|A2RP73|RS7_LACLM	sp|A2RP73|RS7_LACLM	18	19	19	17	17	13	17	17	15	14	16	13	20	20	20	91	91	91	17.683	0	323.31	36553000000	7473	8791800000	7792600000	9918800000	7253800000	6036900000	7225100000	10351000000	6991600000	5296600000	5798300000	5578100000	4183800000	sp|A2RP73|RS7_LACLM30SribosomalproteinS7OS=Lactococcuslactissubsp.cremoris(strainMG1363)GN=rpsGPE=3SV=1	sp|A2RP73|RS7_LACLM30SribosomalproteinS7OS=Lactococcuslactissubsp.cremoris(strainMG1363)GN=rpsGPE=3SV=1
sp|A2RP74|RS12_LACLM	sp|A2RP74|RS12_LACLM	9	9	10	10	8	9	9	9	10	10	10	9	10	10	10	65	65	65	15.124	0	119.56	23350000000	2148	4123600000	3957400000	2632000000	1111500000	1748600000	1161600000	1324200000	1369400000	1217200000	1133800000	1004400000	1168200000	sp|A2RP74|RS12_LACLM30SribosomalproteinS12OS=Lactococcuslactissubsp.cremoris(strainMG1363)GN=rpsLPE=3SV=1	sp|A2RP74|RS12_LACLM30SribosomalproteinS12OS=Lactococcuslactissubsp.cremoris(strainMG1363)GN=rpsLPE=3SV=1
sp|O30415|RNH2_LACLM	sp|O30415|RNH2_LACLM	6	6	6	8	7	8	8	7	6	7	6	7	11	11	11	45.9	45.9	45.9	28.439	0	48.715	49313000	105	7843400	8308900	6158100	5621900	6441600	4340100	7971400	6486500	5667600	4595400	6682400	7594000	sp|O30415|RNH2_LACLMRibonucleaseHIIOS=Lactococcuslactissubsp.cremoris(strainMG1363)GN=rnhBPE=3SV=2	sp|O30415|RNH2_LACLMRibonucleaseHIIOS=Lactococcuslactissubsp.cremoris(strainMG1363)GN=rnhBPE=3SV=2
sp|O30418|DCE_LACLM	sp|O30418|DCE_LACLM	7	7	7	4	4	3	5	5	6	4	6	7	15	15	15	38.8	38.8	38.8	53.923	0	25.329	186470000	48	6777700	7622400	8884800	5035700	6166900	3280100	5593000	7175500	7605800	7997300	6367200	8264200	sp|O30418|DCE_LACLMGlutamatedecarboxylaseOS=Lactococcuslactissubsp.cremoris(strainMG1363)GN=gadBPE=1SV=2	sp|O30418|DCE_LACLMGlutamatedecarboxylaseOS=Lactococcuslactissubsp.cremoris(strainMG1363)GN=gadBPE=1SV=2
sp|O32770|GPO_LACLM	sp|O32770|GPO_LACLM	6	8	6	6	5	4	9	8	5	4	5	4	9	9	9	47.1	47.1	47.1	17.969	0	58.819	70923000	194	16926000	17989000	12316000	13407000	16504000	16558000	9255600	6899300	9854800	11426000	16469000	23312000	sp|O32770|GPO_LACLMGlutathioneperoxidaseOS=Lactococcuslactissubsp.cremoris(strainMG1363)GN=gpoPE=3SV=1	sp|O32770|GPO_LACLMGlutathioneperoxidaseOS=Lactococcuslactissubsp.cremoris(strainMG1363)GN=gpoPE=3SV=1
sp|O32771|CARB_LACLM	sp|O32771|CARB_LACLM	39	37	32	32	30	31	38	35	37	50	47	39	59	59	59	64	64	64	117.43	0	323.31	2452400000	2402	442610000	369810000	329640000	198300000	336980000	221490000	222690000	274240000	194200000	523550000	503730000	313940000	sp|O32771|CARB_LACLMCarbamoyl-phosphatesynthaselargechainOS=Lactococcuslactissubsp.cremoris(strainMG1363)GN=carBPE=2SV=2	sp|O32771|CARB_LACLMCarbamoyl-phosphatesynthaselargechainOS=Lactococcuslactissubsp.cremoris(strainMG1363)GN=carBPE=2SV=2
sp|O32799|PFL_LACLM	sp|O32799|PFL_LACLM	42	44	38	41	35	42	38	34	40	26	32	29	53	53	53	74.5	74.5	74.5	89.106	0	323.31	27228000000	3657	1270300000	1346400000	1197700000	1680700000	972470000	1885200000	1669700000	1068000000	1296300000	613570000	1007400000	1218900000	sp|O32799|PFL_LACLMFormateacetyltransferaseOS=Lactococcuslactissubsp.cremoris(strainMG1363)GN=pflPE=3SV=1	sp|O32799|PFL_LACLMFormateacetyltransferaseOS=Lactococcuslactissubsp.cremoris(strainMG1363)GN=pflPE=3SV=1
sp|O32801|DPO1_LACLM	sp|O32801|DPO1_LACLM	37	38	32	45	43	44	42	44	44	47	48	43	62	62	62	74.5	74.5	74.5	98.865	0	323.31	2649100000	1718	427180000	430810000	365390000	387260000	421600000	449800000	402450000	345280000	382530000	350200000	416410000	347550000	sp|O32801|DPO1_LACLMDNApolymeraseIOS=Lactococcuslactissubsp.cremoris(strainMG1363)GN=polAPE=3SV=2	sp|O32801|DPO1_LACLMDNApolymeraseIOS=Lactococcuslactissubsp.cremoris(strainMG1363)GN=polAPE=3SV=2
sp|O32806|MNMG_LACLM	sp|O32806|MNMG_LACLM	28	28	26	18	21	15	16	17	15	15	19	12	34	34	34	54.2	54.2	54.2	69.334	0	272.08	4094100000	535	72396000	66131000	60551000	22052000	46913000	32825000	41576000	43471000	36761000	38731000	43713000	46576000	sp|O32806|MNMG_LACLMtRNAuridine5-carboxymethylaminomethylmodificationenzymeMnmGOS=Lactococcuslactissubsp.cremoris(strainMG1363)GN=mnmGPE=3SV=2	sp|O32806|MNMG_LACLMtRNAuridine5-carboxymethylaminomethylmodificationenzymeMnmGOS=Lactococcuslactissubsp.cremoris(strainMG1363)GN=mnmGPE=3SV=2
sp|O32808|DEOB_LACLM	sp|O32808|DEOB_LACLM	23	22	19	19	18	18	16	19	16	13	19	13	26	26	26	68.4	68.4	68.4	45.817	0	275.06	5094500000	757	196990000	204760000	209690000	217200000	151220000	99418000	147120000	153670000	167850000	65937000	135160000	128830000	sp|O32808|DEOB_LACLMPhosphopentomutaseOS=Lactococcuslactissubsp.cremoris(strainMG1363)GN=deoBPE=3SV=1	sp|O32808|DEOB_LACLMPhosphopentomutaseOS=Lactococcuslactissubsp.cremoris(strainMG1363)GN=deoBPE=3SV=1
sp|O32810|DEOD_LACLM	sp|O32810|DEOD_LACLM	14	14	13	14	14	14	14	15	14	14	14	14	15	15	15	90.2	90.2	90.2	25.42	0	323.31	6116500000	2594	685160000	688010000	710000000	703520000	811310000	985420000	790840000	850690000	853170000	826500000	1016300000	612500000	sp|O32810|DEOD_LACLMPurinenucleosidephosphorylaseDeoD-typeOS=Lactococcuslactissubsp.cremoris(strainMG1363)GN=deoDPE=3SV=1	sp|O32810|DEOD_LACLMPurinenucleosidephosphorylaseDeoD-typeOS=Lactococcuslactissubsp.cremoris(strainMG1363)GN=deoDPE=3SV=1
sp|O54376|DPO3B_LACLM	sp|O54376|DPO3B_LACLM	18	17	14	17	16	16	14	15	15	13	15	13	23	23	23	77.6	77.6	77.6	42.209	0	323.31	3525500000	847	427710000	426060000	241500000	346230000	390030000	533990000	370950000	369360000	251660000	473190000	606600000	246940000	sp|O54376|DPO3B_LACLMDNApolymeraseIIIsubunitbetaOS=Lactococcuslactissubsp.cremoris(strainMG1363)GN=dnaNPE=3SV=1	sp|O54376|DPO3B_LACLMDNApolymeraseIIIsubunitbetaOS=Lactococcuslactissubsp.cremoris(strainMG1363)GN=dnaNPE=3SV=1
sp|O68185|CLPB_LACLM	sp|O68185|CLPB_LACLM	67	70	70	64	65	63	63	65	64	68	67	58	84	84	82	84.1	84.1	82.4	97.326	0	323.31	33448000000	7456	1969800000	2060600000	1324600000	1788200000	1790600000	1604200000	1315200000	1532100000	1152100000	1391000000	1293600000	1091000000	sp|O68185|CLPB_LACLMChaperoneproteinClpBOS=Lactococcuslactissubsp.cremoris(strainMG1363)GN=clpBPE=2SV=3	sp|O68185|CLPB_LACLMChaperoneproteinClpBOS=Lactococcuslactissubsp.cremoris(strainMG1363)GN=clpBPE=2SV=3
sp|O86281|Y2431_LACLM	sp|O86281|Y2431_LACLM	11	14	11	10	10	9	7	11	11	8	10	8	15	15	15	42.5	42.5	42.5	37.264	0	97.783	402110000	226	14359000	35559000	24652000	12683000	22524000	20586000	16819000	23119000	20140000	14834000	16300000	11792000	sp|O86281|Y2431_LACLMUncharacterizedproteinllmg_2431OS=Lactococcuslactissubsp.cremoris(strainMG1363)GN=llmg_2431PE=3SV=2	sp|O86281|Y2431_LACLMUncharacterizedproteinllmg_2431OS=Lactococcuslactissubsp.cremoris(strainMG1363)GN=llmg_2431PE=3SV=2
sp|O87761|PYRG_LACLM	sp|O87761|PYRG_LACLM	32	32	31	28	26	26	29	28	27	23	26	24	35	35	35	72	72	72	59.454	0	323.31	38354000000	2627	872420000	756340000	717800000	757330000	659610000	695260000	739750000	699300000	589590000	419410000	568740000	677330000	sp|O87761|PYRG_LACLMCTPsynthaseOS=Lactococcuslactissubsp.cremoris(strainMG1363)GN=pyrGPE=3SV=2	sp|O87761|PYRG_LACLMCTPsynthaseOS=Lactococcuslactissubsp.cremoris(strainMG1363)GN=pyrGPE=3SV=2
sp|P0A2Z1|ATPF_LACLM	sp|P0A2Z1|ATPF_LACLM	15	17	16	8	7	8	10	10	8	8	9	8	19	19	18	68.5	68.5	68.5	18.002	0	323.31	2171900000	747	229800000	301300000	258810000	34255000	37808000	57882000	58300000	61907000	50144000	50756000	33247000	45169000	sp|P0A2Z1|ATPF_LACLMATPsynthasesubunitbOS=Lactococcuslactissubsp.cremoris(strainMG1363)GN=atpFPE=3SV=1	sp|P0A2Z1|ATPF_LACLMATPsynthasesubunitbOS=Lactococcuslactissubsp.cremoris(strainMG1363)GN=atpFPE=3SV=1
sp|P0A3C2|ERA_LACLM	sp|P0A3C2|ERA_LACLM	19	17	14	16	15	16	14	13	12	9	12	8	21	21	21	50.2	50.2	50.2	34.737	0	131.28	459800000	511	87610000	45137000	54669000	34502000	52907000	84253000	39930000	33776000	30741000	41023000	25163000	50872000	sp|P0A3C2|ERA_LACLMGTPaseEraOS=Lactococcuslactissubsp.cremoris(strainMG1363)GN=eraPE=3SV=1	sp|P0A3C2|ERA_LACLMGTPaseEraOS=Lactococcuslactissubsp.cremoris(strainMG1363)GN=eraPE=3SV=1
sp|P0A3J1|DNAK_LACLM	sp|P0A3J1|DNAK_LACLM	70	72	68	56	61	58	57	58	50	51	55	48	76	76	76	98.2	98.2	98.2	64.947	0	323.31	151330000000	9865	3828600000	3497500000	4146100000	2405400000	3500200000	2147700000	1828400000	2302500000	1214000000	2086500000	2747800000	1743300000	sp|P0A3J1|DNAK_LACLMChaperoneproteinDnaKOS=Lactococcuslactissubsp.cremoris(strainMG1363)GN=dnaKPE=3SV=1	sp|P0A3J1|DNAK_LACLMChaperoneproteinDnaKOS=Lactococcuslactissubsp.cremoris(strainMG1363)GN=dnaKPE=3SV=1
sp|P0A400|PURR_LACLM	sp|P0A400|PURR_LACLM	15	13	12	12	12	11	11	11	11	11	11	11	19	19	19	81.9	81.9	81.9	30.361	0	280.87	635830000	349	63447000	56506000	72991000	52872000	66076000	140050000	91463000	50765000	70894000	50123000	68450000	47925000	sp|P0A400|PURR_LACLMPuroperonrepressorOS=Lactococcuslactissubsp.cremoris(strainMG1363)GN=purRPE=3SV=1	sp|P0A400|PURR_LACLMPuroperonrepressorOS=Lactococcuslactissubsp.cremoris(strainMG1363)GN=purRPE=3SV=1
sp|P0A4J2|SODM_LACLM	sp|P0A4J2|SODM_LACLM	9	8	9	9	8	8	9	9	9	8	8	8	9	9	9	72.3	72.3	72.3	23.254	0	151.82	9394700000	1315	546810000	775280000	880450000	1164800000	847140000	1008200000	2634500000	1948700000	2451500000	896460000	1149500000	960430000	sp|P0A4J2|SODM_LACLMSuperoxidedismutase[Mn]OS=Lactococcuslactissubsp.cremoris(strainMG1363)GN=sodAPE=3SV=1	sp|P0A4J2|SODM_LACLMSuperoxidedismutase[Mn]OS=Lactococcuslactissubsp.cremoris(strainMG1363)GN=sodAPE=3SV=1
sp|P0CI33|METN_LACLM	sp|P0CI33|METN_LACLM	10	12	5	7	7	6	7	6	8	6	6	5	14	14	14	54.9	54.9	54.9	40.987	0	143.61	234720000	160	10265000	13682000	10743000	16440000	11326000	20141000	21380000	20667000	19466000	19647000	13215000	18936000	sp|P0CI33|METN_LACLMMethionineimportATP-bindingproteinMetNOS=Lactococcuslactissubsp.cremoris(strainMG1363)GN=metNPE=3SV=1	sp|P0CI33|METN_LACLMMethionineimportATP-bindingproteinMetNOS=Lactococcuslactissubsp.cremoris(strainMG1363)GN=metNPE=3SV=1
sp|P0CI34|LDH2_LACLM	sp|P0CI34|LDH2_LACLM	2	3	2	1	1	1	1	1	1	1	1	1	3	3	3	10.8	10.8	10.8	34.398	0	5.1331	4165600	10	0	0	991030	0	0	0	0	0	0	0	0	0	sp|P0CI34|LDH2_LACLML-lactatedehydrogenase2OS=Lactococcuslactissubsp.cremoris(strainMG1363)GN=ldhBPE=3SV=1	sp|P0CI34|LDH2_LACLML-lactatedehydrogenase2OS=Lactococcuslactissubsp.cremoris(strainMG1363)GN=ldhBPE=3SV=1
sp|P0CI35|FOLQ_LACLM	sp|P0CI35|FOLQ_LACLM	4	4	3	1	1	1	4	3	3	0	1	1	8	8	8	58.4	58.4	58.4	19.612	0	50.805	42053000	26	8206400	9901400	10312000	0	0	0	3110800	4109800	3047500	0	0	827160	sp|P0CI35|FOLQ_LACLMProbableDHNTPpyrophosphohydrolaseOS=Lactococcuslactissubsp.cremoris(strainMG1363)GN=folQPE=3SV=1	sp|P0CI35|FOLQ_LACLMProbableDHNTPpyrophosphohydrolaseOS=Lactococcuslactissubsp.cremoris(strainMG1363)GN=folQPE=3SV=1
sp|P22865|USP45_LACLM	sp|P22865|USP45_LACLM	22	22	21	15	12	14	14	14	14	8	10	8	22	22	22	47.9	47.9	47.9	47.363	0	323.31	5500400000	577	214000000	111420000	152560000	50698000	39741000	34399000	45005000	38285000	28389000	32965000	14910000	27667000	sp|P22865|USP45_LACLMSecreted45kDaproteinOS=Lactococcuslactissubsp.cremoris(strainMG1363)GN=usp45PE=1SV=3	sp|P22865|USP45_LACLMSecreted45kDaproteinOS=Lactococcuslactissubsp.cremoris(strainMG1363)GN=usp45PE=1SV=3
sp|P42369|GRPE_LACLM	sp|P42369|GRPE_LACLM	12	12	14	11	9	9	13	12	12	10	11	12	17	17	17	69.3	69.3	69.3	20.567	0	271.71	3294400000	885	322590000	288030000	272530000	519450000	487650000	205060000	172680000	233400000	319770000	344440000	410800000	327750000	sp|P42369|GRPE_LACLMProteinGrpEOS=Lactococcuslactissubsp.cremoris(strainMG1363)GN=grpEPE=3SV=1	sp|P42369|GRPE_LACLMProteinGrpEOS=Lactococcuslactissubsp.cremoris(strainMG1363)GN=grpEPE=3SV=1
sp|P42370|HRCA_LACLM	sp|P42370|HRCA_LACLM	12	16	12	11	11	10	10	9	10	11	9	9	16	16	16	50.4	50.4	50.4	39.921	0	248.9	275150000	212	28104000	24118000	28530000	23836000	27970000	19479000	31985000	17557000	17296000	26801000	22536000	29512000	sp|P42370|HRCA_LACLMHeat-inducibletranscriptionrepressorHrcAOS=Lactococcuslactissubsp.cremoris(strainMG1363)GN=hrcAPE=3SV=1	sp|P42370|HRCA_LACLMHeat-inducibletranscriptionrepressorHrcAOS=Lactococcuslactissubsp.cremoris(strainMG1363)GN=hrcAPE=3SV=1
sp|P43901|TYRA_LACLM	sp|P43901|TYRA_LACLM	7	7	5	5	4	5	4	5	4	3	2	3	12	12	12	37.6	37.6	37.6	39.53	0	8.0152	36846000	54	6327000	6811400	3883200	6656300	3661500	7653100	5333700	6336100	5786100	6227900	0	7387100	sp|P43901|TYRA_LACLMPrephenatedehydrogenaseOS=Lactococcuslactissubsp.cremoris(strainMG1363)GN=tyrAPE=3SV=1	sp|P43901|TYRA_LACLMPrephenatedehydrogenaseOS=Lactococcuslactissubsp.cremoris(strainMG1363)GN=tyrAPE=3SV=1
sp|P43905|AROA_LACLM	sp|P43905|AROA_LACLM	15	15	15	13	13	13	11	12	12	11	12	10	17	17	17	59.5	59.5	59.5	45.803	0	260.41	1085200000	307	38912000	39223000	55697000	61025000	58576000	67464000	70253000	51232000	59281000	41061000	55223000	54205000	sp|P43905|AROA_LACLM3-phosphoshikimate1-carboxyvinyltransferaseOS=Lactococcuslactissubsp.cremoris(strainMG1363)GN=aroAPE=3SV=1	sp|P43905|AROA_LACLM3-phosphoshikimate1-carboxyvinyltransferaseOS=Lactococcuslactissubsp.cremoris(strainMG1363)GN=aroAPE=3SV=1
sp|P43906|AROK_LACLM	sp|P43906|AROK_LACLM	1	1	0	2	2	3	5	5	4	3	5	4	8	8	8	46.3	46.3	46.3	18.528	0	15.314	5751500	40	0	0	0	2486400	3945000	4520100	3794400	3204300	2840600	5141600	4350400	4242900	sp|P43906|AROK_LACLMShikimatekinaseOS=Lactococcuslactissubsp.cremoris(strainMG1363)GN=aroKPE=3SV=1	sp|P43906|AROK_LACLMShikimatekinaseOS=Lactococcuslactissubsp.cremoris(strainMG1363)GN=aroKPE=3SV=1
sp|P43909|PHEA_LACLM	sp|P43909|PHEA_LACLM	5	5	6	4	3	4	3	2	3	4	4	4	8	8	8	39.4	39.4	39.4	31.03	0	34.724	60227000	63	9624800	6159000	6521900	6746400	7007200	8287900	7706400	5580800	8133700	9388900	8795300	8968600	sp|P43909|PHEA_LACLMPrephenatedehydrataseOS=Lactococcuslactissubsp.cremoris(strainMG1363)GN=pheAPE=3SV=1	sp|P43909|PHEA_LACLMPrephenatedehydrataseOS=Lactococcuslactissubsp.cremoris(strainMG1363)GN=pheAPE=3SV=1
sp|P50924|PYRF_LACLM	sp|P50924|PYRF_LACLM	8	8	9	6	5	4	7	5	4	6	7	5	11	11	11	53.2	53.2	53.2	26.169	0	203.91	213980000	198	22188000	10790000	13169000	10616000	5728900	10030000	9899600	7880000	8783000	18301000	11397000	8308500	sp|P50924|PYRF_LACLMOrotidine5'-phosphatedecarboxylaseOS=Lactococcuslactissubsp.cremoris(strainMG1363)GN=pyrFPE=3SV=1	sp|P50924|PYRF_LACLMOrotidine5'-phosphatedecarboxylaseOS=Lactococcuslactissubsp.cremoris(strainMG1363)GN=pyrFPE=3SV=1
sp|P50926|UPP_LACLM	sp|P50926|UPP_LACLM	16	15	14	12	12	10	13	15	11	10	10	11	17	17	17	75.4	75.4	75.4	23.231	0	323.31	3899100000	1358	363490000	270980000	293700000	316830000	279150000	396490000	457160000	385780000	452490000	419750000	344660000	286050000	sp|P50926|UPP_LACLMUracilphosphoribosyltransferaseOS=Lactococcuslactissubsp.cremoris(strainMG1363)GN=uppPE=3SV=1	sp|P50926|UPP_LACLMUracilphosphoribosyltransferaseOS=Lactococcuslactissubsp.cremoris(strainMG1363)GN=uppPE=3SV=1
sp|P54322|PYRDB_LACLM	sp|P54322|PYRDB_LACLM	8	10	4	2	4	4	1	2	1	9	7	6	12	12	12	49.2	49.2	49.2	32.93	0	92.332	49217000	72	8830400	3192000	7754300	4759900	5511400	7166800	0	1931200	0	13890000	10984000	5121600	sp|P54322|PYRDB_LACLMDihydroorotatedehydrogenaseB(NAD(+)),catalyticsubunitOS=Lactococcuslactissubsp.cremoris(strainMG1363)GN=pyrDBPE=1SV=2	sp|P54322|PYRDB_LACLMDihydroorotatedehydrogenaseB(NAD(+)),catalyticsubunitOS=Lactococcuslactissubsp.cremoris(strainMG1363)GN=pyrDBPE=1SV=2
sp|P56968|PYRK_LACLM	sp|P56968|PYRK_LACLM	5	5	7	4	5	3	5	4	5	7	8	6	12	12	12	63.7	63.7	63.7	28.66	0	142.22	114770000	116	20678000	16219000	26091000	7475500	7258500	2543200	4913500	7591600	5935200	19252000	11996000	9868000	sp|P56968|PYRK_LACLMDihydroorotatedehydrogenaseB(NAD(+)),electrontransfersubunitOS=Lactococcuslactissubsp.cremoris(strainMG1363)GN=pyrKPE=1SV=1	sp|P56968|PYRK_LACLMDihydroorotatedehydrogenaseB(NAD(+)),electrontransfersubunitOS=Lactococcuslactissubsp.cremoris(strainMG1363)GN=pyrKPE=1SV=1
sp|P60376|SPX_LACLM	sp|P60376|SPX_LACLM	4	4	5	4	4	4	4	5	5	5	5	5	5	5	5	47.7	47.7	47.7	15.03	0	228.02	699560000	250	87377000	61574000	72694000	69779000	73587000	80506000	157080000	118090000	129830000	89692000	86950000	65718000	sp|P60376|SPX_LACLMRegulatoryproteinSpxOS=Lactococcuslactissubsp.cremoris(strainMG1363)GN=spxAPE=3SV=1	sp|P60376|SPX_LACLMRegulatoryproteinSpxOS=Lactococcuslactissubsp.cremoris(strainMG1363)GN=spxAPE=3SV=1
sp|P77880|ALDC_LACLM	sp|P77880|ALDC_LACLM	6	5	4	5	2	4	6	5	4	3	4	3	9	9	9	43.2	43.2	43.2	26.366	0	151.09	192850000	190	12542000	12042000	17513000	26395000	17235000	21305000	37116000	33350000	24812000	14954000	17122000	17895000	sp|P77880|ALDC_LACLMAlpha-acetolactatedecarboxylaseOS=Lactococcuslactissubsp.cremoris(strainMG1363)GN=aldBPE=3SV=1	sp|P77880|ALDC_LACLMAlpha-acetolactatedecarboxylaseOS=Lactococcuslactissubsp.cremoris(strainMG1363)GN=aldBPE=3SV=1
sp|P96789|6PGD_LACLM	sp|P96789|6PGD_LACLM	36	34	34	27	27	27	24	27	28	22	25	22	40	40	40	81.4	81.4	81.4	52.46	0	323.31	18038000000	1957	1150300000	1088000000	795780000	852840000	740250000	1158100000	1009600000	917290000	835200000	618610000	968320000	464590000	sp|P96789|6PGD_LACLM6-phosphogluconatedehydrogenase,decarboxylatingOS=Lactococcuslactissubsp.cremoris(strainMG1363)GN=gndPE=1SV=3	sp|P96789|6PGD_LACLM6-phosphogluconatedehydrogenase,decarboxylatingOS=Lactococcuslactissubsp.cremoris(strainMG1363)GN=gndPE=1SV=3
sp|P97046|LMRA_LACLM	sp|P97046|LMRA_LACLM	7	8	6	8	8	8	8	8	9	10	8	10	14	14	14	31.4	31.4	31.4	64.616	0	228.17	258890000	191	10996000	7745400	10703000	4596800	13848000	11573000	10110000	9817500	6663100	16576000	6933500	10057000	sp|P97046|LMRA_LACLMMultidrugresistanceABCtransporterATP-bindingandpermeaseproteinOS=Lactococcuslactissubsp.cremoris(strainMG1363)GN=lmrAPE=3SV=3	sp|P97046|LMRA_LACLMMultidrugresistanceABCtransporterATP-bindingandpermeaseproteinOS=Lactococcuslactissubsp.cremoris(strainMG1363)GN=lmrAPE=3SV=3
sp|Q48677|PEPA_LACLM	sp|Q48677|PEPA_LACLM	15	15	15	10	9	11	9	10	9	9	10	7	17	17	17	53.2	53.2	53.2	38.324	0	199.77	1491900000	552	122710000	166850000	132590000	117780000	149780000	179810000	112060000	108470000	109170000	76912000	125300000	71597000	sp|Q48677|PEPA_LACLMGlutamylaminopeptidaseOS=Lactococcuslactissubsp.cremoris(strainMG1363)GN=pepAPE=1SV=1	sp|Q48677|PEPA_LACLMGlutamylaminopeptidaseOS=Lactococcuslactissubsp.cremoris(strainMG1363)GN=pepAPE=1SV=1
sp|Q48708|NRDH_LACLM	sp|Q48708|NRDH_LACLM	3	2	3	3	3	5	6	5	5	6	4	5	7	7	7	81.9	81.9	81.9	8.3016	0	9.9332	45837000	150	21997000	9507700	9059500	22397000	1749600	20052000	7038200	7194200	9632700	9501800	16403000	9399200	sp|Q48708|NRDH_LACLMGlutaredoxin-likeproteinNrdHOS=Lactococcuslactissubsp.cremoris(strainMG1363)GN=nrdHPE=1SV=1	sp|Q48708|NRDH_LACLMGlutaredoxin-likeproteinNrdHOS=Lactococcuslactissubsp.cremoris(strainMG1363)GN=nrdHPE=1SV=1
sp|Q48709|NRDI_LACLM	sp|Q48709|NRDI_LACLM	8	8	7	5	5	5	6	6	7	4	5	4	9	9	9	92.1	92.1	92.1	15.666	0	147.8	571720000	205	155190000	211980000	119690000	192960000	87085000	111820000	148220000	70645000	89736000	96065000	114740000	107110000	sp|Q48709|NRDI_LACLMProteinNrdIOS=Lactococcuslactissubsp.cremoris(strainMG1363)GN=nrdIPE=3SV=1	sp|Q48709|NRDI_LACLMProteinNrdIOS=Lactococcuslactissubsp.cremoris(strainMG1363)GN=nrdIPE=3SV=1
sp|Q59491|ASSY_LACLM	sp|Q59491|ASSY_LACLM	23	21	22	20	20	21	18	19	18	19	19	17	27	27	27	67	67	67	43.827	0	323.31	6384500000	2585	297810000	366080000	330800000	751250000	821770000	625410000	511900000	439220000	589040000	818870000	851940000	539950000	sp|Q59491|ASSY_LACLMArgininosuccinatesynthaseOS=Lactococcuslactissubsp.cremoris(strainMG1363)GN=argGPE=3SV=2	sp|Q59491|ASSY_LACLMArgininosuccinatesynthaseOS=Lactococcuslactissubsp.cremoris(strainMG1363)GN=argGPE=3SV=2
sp|Q8GJP4|FOLKE_LACLM	sp|Q8GJP4|FOLKE_LACLM	13	16	11	16	15	15	12	12	14	15	14	12	20	20	20	53.9	53.9	53.9	40.261	0	271.71	289610000	325	18819000	23136000	25323000	21809000	26181000	25229000	26928000	25726000	24870000	25855000	24768000	22902000	sp|Q8GJP4|FOLKE_LACLMBifunctionalproteinFolKEOS=Lactococcuslactissubsp.cremoris(strainMG1363)GN=folKEPE=3SV=1	sp|Q8GJP4|FOLKE_LACLMBifunctionalproteinFolKEOS=Lactococcuslactissubsp.cremoris(strainMG1363)GN=folKEPE=3SV=1
sp|Q8GJP6|CLPX_LACLM	sp|Q8GJP6|CLPX_LACLM	27	25	24	20	21	24	22	25	22	19	20	18	32	32	32	76.9	76.9	76.9	45.848	0	323.31	3940100000	893	197840000	108640000	252290000	282970000	334280000	441650000	326030000	280720000	291320000	332460000	270520000	275490000	sp|Q8GJP6|CLPX_LACLMATP-dependentClpproteaseATP-bindingsubunitClpXOS=Lactococcuslactissubsp.cremoris(strainMG1363)GN=clpXPE=3SV=1	sp|Q8GJP6|CLPX_LACLMATP-dependentClpproteaseATP-bindingsubunitClpXOS=Lactococcuslactissubsp.cremoris(strainMG1363)GN=clpXPE=3SV=1
sp|Q9AEP7|CH60_LACLM	sp|Q9AEP7|CH60_LACLM	42	42	41	36	40	38	38	40	39	34	34	34	47	47	47	90.6	90.6	90.6	57.196	0	323.31	72983000000	5815	2316800000	1459700000	2159900000	1467000000	1937100000	2273300000	2004900000	1689500000	1459500000	1064800000	1333500000	1898500000	sp|Q9AEP7|CH60_LACLM60kDachaperoninOS=Lactococcuslactissubsp.cremoris(strainMG1363)GN=groLPE=3SV=1	sp|Q9AEP7|CH60_LACLM60kDachaperoninOS=Lactococcuslactissubsp.cremoris(strainMG1363)GN=groLPE=3SV=1
sp|Q9AEP8|CH10_LACLM	sp|Q9AEP8|CH10_LACLM	7	7	7	8	10	9	9	8	8	7	8	7	10	10	10	88.3	88.3	88.3	10.199	0	102.63	1301100000	1642	164490000	194570000	174870000	230770000	279340000	232820000	178830000	178860000	213070000	209050000	249750000	228630000	sp|Q9AEP8|CH10_LACLM10kDachaperoninOS=Lactococcuslactissubsp.cremoris(strainMG1363)GN=groSPE=3SV=1	sp|Q9AEP8|CH10_LACLM10kDachaperoninOS=Lactococcuslactissubsp.cremoris(strainMG1363)GN=groSPE=3SV=1
sp|Q9K575|OTCC_LACLM	sp|Q9K575|OTCC_LACLM	25	25	25	22	23	22	23	23	22	22	22	20	27	27	27	84.2	84.2	84.2	39.468	0	323.31	32350000000	3944	2471200000	2925200000	3450100000	2238500000	2404300000	2511500000	2250500000	1752000000	1897700000	1914300000	1995600000	1976700000	sp|Q9K575|OTCC_LACLMOrnithinecarbamoyltransferase,catabolicOS=Lactococcuslactissubsp.cremoris(strainMG1363)GN=arcBPE=3SV=1	sp|Q9K575|OTCC_LACLMOrnithinecarbamoyltransferase,catabolicOS=Lactococcuslactissubsp.cremoris(strainMG1363)GN=arcBPE=3SV=1
sp|Q9K576|ARCA_LACLM	sp|Q9K576|ARCA_LACLM	25	23	21	20	20	20	18	22	22	18	19	19	26	26	26	70.7	70.7	70.7	45.981	0	323.31	40399000000	4159	1872700000	1435500000	2010000000	1531900000	1551300000	2248500000	1560700000	1166800000	1301100000	790270000	1347000000	1021600000	sp|Q9K576|ARCA_LACLMArgininedeiminaseOS=Lactococcuslactissubsp.cremoris(strainMG1363)GN=arcAPE=3SV=1	sp|Q9K576|ARCA_LACLMArgininedeiminaseOS=Lactococcuslactissubsp.cremoris(strainMG1363)GN=arcAPE=3SV=1
sp|Q9L4N5|CARA_LACLM	sp|Q9L4N5|CARA_LACLM	8	8	5	3	1	3	4	4	3	3	2	3	9	9	9	33.6	33.6	33.6	39.636	0	26.188	423030000	79	13593000	13971000	11853000	4178700	0	6778300	7889500	6598500	5492000	12129000	8841200	4377300	sp|Q9L4N5|CARA_LACLMCarbamoyl-phosphatesynthasesmallchainOS=Lactococcuslactissubsp.cremoris(strainMG1363)GN=carAPE=3SV=1	sp|Q9L4N5|CARA_LACLMCarbamoyl-phosphatesynthasesmallchainOS=Lactococcuslactissubsp.cremoris(strainMG1363)GN=carAPE=3SV=1
sp|Q9L4N6|PYRB_LACLM	sp|Q9L4N6|PYRB_LACLM	7	9	5	4	2	4	3	4	3	6	5	3	10	10	10	38.1	38.1	38.1	34.558	0	74.993	144910000	117	19645000	10873000	18976000	4121300	6358500	10602000	7500100	4467700	2544600	25866000	10473000	8204400	sp|Q9L4N6|PYRB_LACLMAspartatecarbamoyltransferaseOS=Lactococcuslactissubsp.cremoris(strainMG1363)GN=pyrBPE=3SV=1	sp|Q9L4N6|PYRB_LACLMAspartatecarbamoyltransferaseOS=Lactococcuslactissubsp.cremoris(strainMG1363)GN=pyrBPE=3SV=1
sp|Q9L4N8|PYRR_LACLM	sp|Q9L4N8|PYRR_LACLM	16	16	14	14	14	14	14	15	12	13	12	9	17	17	17	73.4	73.4	73.4	19.812	0	262.91	2750300000	930	307800000	299900000	219900000	147280000	104460000	237540000	232970000	207910000	131050000	236670000	301050000	186220000	sp|Q9L4N8|PYRR_LACLMPyrimidineoperonregulatoryproteinOS=Lactococcuslactissubsp.cremoris(strainMG1363)GN=pyrRPE=3SV=1	sp|Q9L4N8|PYRR_LACLMPyrimidineoperonregulatoryproteinOS=Lactococcuslactissubsp.cremoris(strainMG1363)GN=pyrRPE=3SV=1
sp|Q9L6G1|ENGB_LACLM	sp|Q9L6G1|ENGB_LACLM	10	7	8	6	5	5	10	10	10	6	5	9	12	12	12	63.6	63.6	63.6	22.46	0	220.9	350060000	310	27672000	21545000	17962000	41456000	36775000	74231000	82138000	48826000	60654000	60692000	53387000	46835000	sp|Q9L6G1|ENGB_LACLMProbableGTP-bindingproteinEngBOS=Lactococcuslactissubsp.cremoris(strainMG1363)GN=engBPE=3SV=1	sp|Q9L6G1|ENGB_LACLMProbableGTP-bindingproteinEngBOS=Lactococcuslactissubsp.cremoris(strainMG1363)GN=engBPE=3SV=1
sp|Q9RAT9|ATPE_LACLM	sp|Q9RAT9|ATPE_LACLM	4	5	4	2	4	4	3	2	3	3	3	2	8	8	8	63.8	63.8	63.8	15.584	0	107.61	384140000	120	19965000	18553000	35837000	33157000	45726000	41527000	23714000	59877000	56735000	56194000	24448000	53071000	sp|Q9RAT9|ATPE_LACLMATPsynthaseepsilonchainOS=Lactococcuslactissubsp.cremoris(strainMG1363)GN=atpCPE=3SV=1	sp|Q9RAT9|ATPE_LACLMATPsynthaseepsilonchainOS=Lactococcuslactissubsp.cremoris(strainMG1363)GN=atpCPE=3SV=1
sp|Q9RAU1|ATPG_LACLM	sp|Q9RAU1|ATPG_LACLM	16	18	15	16	17	16	17	15	16	20	19	19	22	22	22	74.4	74.4	74.4	32	0	323.31	1136900000	952	210170000	97048000	237720000	113760000	195370000	148880000	91865000	98225000	134340000	286180000	217510000	219220000	sp|Q9RAU1|ATPG_LACLMATPsynthasegammachainOS=Lactococcuslactissubsp.cremoris(strainMG1363)GN=atpGPE=3SV=1	sp|Q9RAU1|ATPG_LACLMATPsynthasegammachainOS=Lactococcuslactissubsp.cremoris(strainMG1363)GN=atpGPE=3SV=1
sp|Q9RLU5|ALR_LACLM	sp|Q9RLU5|ALR_LACLM	4	9	5	8	6	8	5	8	7	3	5	3	11	11	11	34.9	34.9	34.9	40.676	0	83.025	74187000	77	8757000	5361100	7939800	5481500	5933800	4207800	4887300	5185600	5462400	6579300	6943700	11731000	sp|Q9RLU5|ALR_LACLMAlanineracemaseOS=Lactococcuslactissubsp.cremoris(strainMG1363)GN=alrPE=1SV=2	sp|Q9RLU5|ALR_LACLMAlanineracemaseOS=Lactococcuslactissubsp.cremoris(strainMG1363)GN=alrPE=1SV=2
sp|Q9S5Z2|CLPE_LACLM	sp|Q9S5Z2|CLPE_LACLM	53	55	44	37	43	34	38	43	35	30	38	31	62	60	59	74.3	72.3	72.3	83.205	0	323.31	18952000000	1996	426210000	379070000	337340000	191130000	304570000	429090000	295270000	275720000	273460000	352170000	258190000	225560000	sp|Q9S5Z2|CLPE_LACLMATP-dependentClpproteaseATP-bindingsubunitClpEOS=Lactococcuslactissubsp.cremoris(strainMG1363)GN=clpEPE=1SV=2	sp|Q9S5Z2|CLPE_LACLMATP-dependentClpproteaseATP-bindingsubunitClpEOS=Lactococcuslactissubsp.cremoris(strainMG1363)GN=clpEPE=1SV=2
sp|Q9S6S2|GAL1_LACLM	sp|Q9S6S2|GAL1_LACLM	2	4	2	1	0	0	1	1	1	3	2	3	5	5	5	10.8	10.8	10.8	43.741	0.0027304	2.0405	15622000	13	2707000	1351800	1992400	0	0	0	0	0	0	1362600	0	2559100	sp|Q9S6S2|GAL1_LACLMGalactokinaseOS=Lactococcuslactissubsp.cremoris(strainMG1363)GN=galKPE=3SV=1	sp|Q9S6S2|GAL1_LACLMGalactokinaseOS=Lactococcuslactissubsp.cremoris(strainMG1363)GN=galKPE=3SV=1
sp|Q9S6S3|GALT_LACLM	sp|Q9S6S3|GALT_LACLM	5	4	3	1	1	0	1	1	1	1	0	1	5	5	5	9.9	9.9	9.9	56.259	0	4.0753	302170000	25	21041000	25550000	37171000	0	0	0	0	0	0	0	0	0	sp|Q9S6S3|GALT_LACLMGalactose-1-phosphateuridylyltransferaseOS=Lactococcuslactissubsp.cremoris(strainMG1363)GN=galTPE=3SV=1	sp|Q9S6S3|GALT_LACLMGalactose-1-phosphateuridylyltransferaseOS=Lactococcuslactissubsp.cremoris(strainMG1363)GN=galTPE=3SV=1
sp|Q9Z5K8|PYRH_LACLM	sp|Q9Z5K8|PYRH_LACLM	15	15	10	14	14	12	13	14	12	13	11	12	15	15	15	77.3	77.3	77.3	25.677	0	174.06	3108500000	1102	217370000	290680000	342220000	119630000	231630000	230060000	105840000	134220000	117320000	257910000	257190000	185850000	sp|Q9Z5K8|PYRH_LACLMUridylatekinaseOS=Lactococcuslactissubsp.cremoris(strainMG1363)GN=pyrHPE=3SV=2	sp|Q9Z5K8|PYRH_LACLMUridylatekinaseOS=Lactococcuslactissubsp.cremoris(strainMG1363)GN=pyrHPE=3SV=2
sp|Q9Z6H4|GUAA_LACLM	sp|Q9Z6H4|GUAA_LACLM	34	34	33	30	32	33	31	30	27	28	30	29	36	36	36	74.5	74.5	74.5	56.887	0	323.31	17600000000	2420	554030000	565150000	685020000	647970000	672630000	784280000	545240000	536710000	617520000	438240000	547620000	394410000	sp|Q9Z6H4|GUAA_LACLMGMPsynthase[glutamine-hydrolyzing]OS=Lactococcuslactissubsp.cremoris(strainMG1363)GN=guaAPE=3SV=2	sp|Q9Z6H4|GUAA_LACLMGMPsynthase[glutamine-hydrolyzing]OS=Lactococcuslactissubsp.cremoris(strainMG1363)GN=guaAPE=3SV=2
sp|Q9ZAB0|CLPP_LACLM	sp|Q9ZAB0|CLPP_LACLM	12	11	12	14	10	11	13	13	13	10	11	12	14	14	14	80.9	80.9	80.9	22.052	0	323.31	4679900000	1264	306280000	403400000	481460000	714540000	604600000	362650000	554120000	514470000	611430000	583270000	405150000	437310000	sp|Q9ZAB0|CLPP_LACLMATP-dependentClpproteaseproteolyticsubunitOS=Lactococcuslactissubsp.cremoris(strainMG1363)GN=clpPPE=2SV=2	sp|Q9ZAB0|CLPP_LACLMATP-dependentClpproteaseproteolyticsubunitOS=Lactococcuslactissubsp.cremoris(strainMG1363)GN=clpPPE=2SV=2
sp|Q9ZAI9|SEPF_LACLM	sp|Q9ZAI9|SEPF_LACLM	15	11	15	12	11	9	16	16	13	11	9	11	19	19	19	71.4	71.4	71.4	21.938	0	143.29	1092800000	842	116490000	108250000	110740000	66927000	79113000	133040000	109560000	72728000	86193000	116820000	53302000	182770000	sp|Q9ZAI9|SEPF_LACLMCelldivisionproteinSepFOS=Lactococcuslactissubsp.cremoris(strainMG1363)GN=sepFPE=3SV=1	sp|Q9ZAI9|SEPF_LACLMCelldivisionproteinSepFOS=Lactococcuslactissubsp.cremoris(strainMG1363)GN=sepFPE=3SV=1
tr|A2RH78|A2RH78_LACLM	tr|A2RH78|A2RH78_LACLM	2	1	2	0	0	1	1	1	2	1	1	1	2	2	2	24.2	24.2	24.2	7.555	0	3.4512	7151300	31	1115700	0	2089900	0	0	0	0	0	556440	0	0	0	tr|A2RH78|A2RH78_LACLMUncharacterizedproteinOS=Lactococcuslactissubsp.cremoris(strainMG1363)GN=llmg_0005PE=4SV=1	tr|A2RH78|A2RH78_LACLMUncharacterizedproteinOS=Lactococcuslactissubsp.cremoris(strainMG1363)GN=llmg_0005PE=4SV=1
tr|A2RH79|A2RH79_LACLM	tr|A2RH79|A2RH79_LACLM	1	2	1	2	1	2	1	2	1	2	2	2	3	3	3	9.2	9.2	9.2	21.445	0	4.5209	65458000	28	0	0	0	3491700	0	1159800	0	13559000	0	10197000	12083000	21581000	tr|A2RH79|A2RH79_LACLMUncharacterizedproteinOS=Lactococcuslactissubsp.cremoris(strainMG1363)GN=llmg_0006PE=4SV=1	tr|A2RH79|A2RH79_LACLMUncharacterizedproteinOS=Lactococcuslactissubsp.cremoris(strainMG1363)GN=llmg_0006PE=4SV=1
tr|A2RH80|A2RH80_LACLM	tr|A2RH80|A2RH80_LACLM	27	25	22	25	25	29	22	25	24	15	21	18	33	33	33	84.9	84.9	84.9	41.241	0	323.31	8765400000	1256	545740000	348000000	577160000	509110000	490450000	909900000	476770000	435440000	378030000	317360000	484050000	369690000	tr|A2RH80|A2RH80_LACLMRibosome-bindingATPaseYchFOS=Lactococcuslactissubsp.cremoris(strainMG1363)GN=ychFPE=3SV=1	tr|A2RH80|A2RH80_LACLMRibosome-bindingATPaseYchFOS=Lactococcuslactissubsp.cremoris(strainMG1363)GN=ychFPE=3SV=1
tr|A2RH86|A2RH86_LACLM	tr|A2RH86|A2RH86_LACLM	26	24	24	29	29	34	39	30	39	47	34	34	58	58	58	57.7	57.7	57.7	135.51	0	323.31	535970000	782	89363000	89220000	78505000	47412000	130320000	102470000	110150000	103830000	104030000	106160000	101230000	116510000	tr|A2RH86|A2RH86_LACLMTranscription-repair-couplingfactorOS=Lactococcuslactissubsp.cremoris(strainMG1363)GN=mfdPE=3SV=1	tr|A2RH86|A2RH86_LACLMTranscription-repair-couplingfactorOS=Lactococcuslactissubsp.cremoris(strainMG1363)GN=mfdPE=3SV=1
tr|A2RH87|A2RH87_LACLM	tr|A2RH87|A2RH87_LACLM	5	2	3	3	4	4	3	3	2	2	4	3	6	6	6	42.7	42.7	42.7	10.442	0	17.786	48784000	129	4858300	16380000	4418200	11037000	8621900	7817300	6945800	10013000	9395900	9427800	12797000	17327000	tr|A2RH87|A2RH87_LACLMUncharacterizedproteinOS=Lactococcuslactissubsp.cremoris(strainMG1363)GN=llmg_0015PE=4SV=1	tr|A2RH87|A2RH87_LACLMUncharacterizedproteinOS=Lactococcuslactissubsp.cremoris(strainMG1363)GN=llmg_0015PE=4SV=1
tr|A2RH88|A2RH88_LACLM	tr|A2RH88|A2RH88_LACLM	9	8	7	7	4	5	6	6	6	2	4	4	12	12	12	66.1	66.1	66.1	14.14	0	102.27	75297000	161	14330000	22609000	18691000	8883800	6902900	7995000	7623700	11115000	11443000	4928600	11405000	9758600	tr|A2RH88|A2RH88_LACLMUncharacterizedproteinOS=Lactococcuslactissubsp.cremoris(strainMG1363)GN=llmg_0016PE=4SV=1	tr|A2RH88|A2RH88_LACLMUncharacterizedproteinOS=Lactococcuslactissubsp.cremoris(strainMG1363)GN=llmg_0016PE=4SV=1
tr|A2RH89|A2RH89_LACLM	tr|A2RH89|A2RH89_LACLM	2	2	3	4	4	4	6	6	4	3	5	4	7	7	7	58.9	58.9	58.9	12.413	0	15.652	113280000	72	24570000	23337000	4085600	19942000	18631000	10721000	10488000	18778000	15017000	12661000	13777000	19376000	tr|A2RH89|A2RH89_LACLMUncharacterizedproteinOS=Lactococcuslactissubsp.cremoris(strainMG1363)GN=llmg_0017PE=4SV=1	tr|A2RH89|A2RH89_LACLMUncharacterizedproteinOS=Lactococcuslactissubsp.cremoris(strainMG1363)GN=llmg_0017PE=4SV=1
tr|A2RH90|A2RH90_LACLM	tr|A2RH90|A2RH90_LACLM	6	6	6	3	3	2	4	4	4	1	3	1	8	8	8	26.7	26.7	26.7	49.268	0	40.95	67254000	46	2041200	1530200	2352800	3092700	1829800	3909000	2185200	2141000	2450800	0	1330700	0	tr|A2RH90|A2RH90_LACLMUncharacterizedproteinOS=Lactococcuslactissubsp.cremoris(strainMG1363)GN=llmg_0018PE=4SV=1	tr|A2RH90|A2RH90_LACLMUncharacterizedproteinOS=Lactococcuslactissubsp.cremoris(strainMG1363)GN=llmg_0018PE=4SV=1
tr|A2RH91|A2RH91_LACLM	tr|A2RH91|A2RH91_LACLM	4	6	3	2	2	1	3	3	3	1	2	2	8	8	8	20.4	20.4	20.4	49.321	0	25.457	34978000	29	1264800	1400700	1408900	1291400	1615400	0	2473400	1481400	1660000	0	859700	1732500	tr|A2RH91|A2RH91_LACLMtRNA(Ile)-lysidinesynthaseOS=Lactococcuslactissubsp.cremoris(strainMG1363)GN=mesJPE=3SV=1	tr|A2RH91|A2RH91_LACLMtRNA(Ile)-lysidinesynthaseOS=Lactococcuslactissubsp.cremoris(strainMG1363)GN=mesJPE=3SV=1
tr|A2RH92|A2RH92_LACLM	tr|A2RH92|A2RH92_LACLM	11	10	12	11	11	8	13	11	11	10	9	10	14	14	14	77.6	77.6	77.6	20.607	0	212.75	1786700000	842	160050000	183830000	125790000	244000000	232010000	235970000	293830000	195480000	208810000	214340000	318730000	150190000	tr|A2RH92|A2RH92_LACLMHptproteinOS=Lactococcuslactissubsp.cremoris(strainMG1363)GN=hptPE=4SV=1	tr|A2RH92|A2RH92_LACLMHptproteinOS=Lactococcuslactissubsp.cremoris(strainMG1363)GN=hptPE=4SV=1
tr|A2RH93|A2RH93_LACLM	tr|A2RH93|A2RH93_LACLM	53	50	45	40	40	39	40	42	38	38	37	30	60	60	60	78.6	78.6	78.6	75.51	0	323.31	35427000000	3086	963980000	967480000	936860000	698360000	877560000	785470000	812370000	772790000	625930000	1078400000	876010000	794480000	tr|A2RH93|A2RH93_LACLMATP-dependentzincmetalloproteaseFtsHOS=Lactococcuslactissubsp.cremoris(strainMG1363)GN=ftsHPE=3SV=1	tr|A2RH93|A2RH93_LACLMATP-dependentzincmetalloproteaseFtsHOS=Lactococcuslactissubsp.cremoris(strainMG1363)GN=ftsHPE=3SV=1
tr|A2RHB1|A2RHB1_LACLM	tr|A2RHB1|A2RHB1_LACLM	1	0	1	1	2	2	3	0	2	2	3	0	4	4	4	56.5	56.5	56.5	12.772	0	7.2527	3574500	27	0	0	0	0	0	2886400	1909800	0	2542900	3028900	3302700	0	tr|A2RHB1|A2RHB1_LACLMPs117proteinOS=Lactococcuslactissubsp.cremoris(strainMG1363)GN=ps117PE=4SV=1	tr|A2RHB1|A2RHB1_LACLMPs117proteinOS=Lactococcuslactissubsp.cremoris(strainMG1363)GN=ps117PE=4SV=1
tr|A2RHB3|A2RHB3_LACLM	tr|A2RHB3|A2RHB3_LACLM	2	2	3	1	1	0	0	0	0	0	0	0	4	4	4	27.9	27.9	27.9	15.885	0	44.571	97468000	12	13386000	12951000	11954000	0	0	0	0	0	0	0	0	0	tr|A2RHB3|A2RHB3_LACLMPs115proteinOS=Lactococcuslactissubsp.cremoris(strainMG1363)GN=ps115PE=4SV=1	tr|A2RHB3|A2RHB3_LACLMPs115proteinOS=Lactococcuslactissubsp.cremoris(strainMG1363)GN=ps115PE=4SV=1
tr|A2RHB7|A2RHB7_LACLM	tr|A2RHB7|A2RHB7_LACLM	8	8	7	2	0	0	1	1	2	0	1	0	9	9	9	25.2	25.2	25.2	47.319	0	174.86	76304000	27	2002900	1375100	1557800	0	0	0	0	0	0	0	0	0	tr|A2RHB7|A2RHB7_LACLMPs111proteinOS=Lactococcuslactissubsp.cremoris(strainMG1363)GN=ps111PE=4SV=1	tr|A2RHB7|A2RHB7_LACLMPs111proteinOS=Lactococcuslactissubsp.cremoris(strainMG1363)GN=ps111PE=4SV=1
tr|A2RHC0|A2RHC0_LACLM	tr|A2RHC0|A2RHC0_LACLM	0	0	0	0	0	2	0	0	2	2	2	2	2	2	2	35.1	35.1	35.1	8.1874	0	8.0689	402050	19	0	0	0	0	0	1204200	0	0	536490	331350	530380	497310	tr|A2RHC0|A2RHC0_LACLMPs108proteinOS=Lactococcuslactissubsp.cremoris(strainMG1363)GN=ps108PE=4SV=1	tr|A2RHC0|A2RHC0_LACLMPs108proteinOS=Lactococcuslactissubsp.cremoris(strainMG1363)GN=ps108PE=4SV=1
tr|A2RHC1|A2RHC1_LACLM	tr|A2RHC1|A2RHC1_LACLM	7	8	6	3	2	2	1	1	2	1	4	1	11	11	11	25.1	25.1	25.1	47.732	0	30.415	75540000	38	3527800	4084100	4002900	3479500	2234400	2801900	0	0	0	0	1651800	0	tr|A2RHC1|A2RHC1_LACLMTnp712proteinOS=Lactococcuslactissubsp.cremoris(strainMG1363)GN=tnp712PE=4SV=1;tr|A2RK59|A2RK59_LACLMTnp712proteinOS=Lactococcuslactissubsp.cremoris(strainMG1363)GN=tnp712PE=4SV=1	tr|A2RHC1|A2RHC1_LACLMTnp712proteinOS=Lactococcuslactissubsp.cremoris(strainMG1363)GN=tnp712PE=4SV=1;tr|A2RK59|A2RK59_LACLMTnp712proteinOS=Lactococcuslactissubsp.cremoris(strainMG1363)GN=tnp712PE=4SV=1
tr|A2RHC2|A2RHC2_LACLM	tr|A2RHC2|A2RHC2_LACLM	2	1	0	1	1	1	1	1	1	2	2	3	4	4	4	14.7	14.7	14.7	29.491	0	4.4571	5584800	9	0	0	0	0	0	0	0	0	0	2215900	0	1306700	tr|A2RHC2|A2RHC2_LACLMUncharacterizedproteinOS=Lactococcuslactissubsp.cremoris(strainMG1363)GN=llmg_0050PE=4SV=1	tr|A2RHC2|A2RHC2_LACLMUncharacterizedproteinOS=Lactococcuslactissubsp.cremoris(strainMG1363)GN=llmg_0050PE=4SV=1
tr|A2RNE3|A2RNE3_LACLM	tr|A2RNE3|A2RNE3_LACLM	0	0	0	1	0	0	0	0	0	2	2	0	2	2	2	19.2	19.2	19.2	11.824	0.0079893	1.3119	8993300	7	0	0	0	0	0	0	0	0	0	15389000	85606000	0	tr|A2RNE3|A2RNE3_LACLMPs503proteinOS=Lactococcuslactissubsp.cremoris(strainMG1363)GN=ps503PE=4SV=1;tr|A2RHC3|A2RHC3_LACLMPs105proteinOS=Lactococcuslactissubsp.cremoris(strainMG1363)GN=ps105PE=4SV=1	tr|A2RNE3|A2RNE3_LACLMPs503proteinOS=Lactococcuslactissubsp.cremoris(strainMG1363)GN=ps503PE=4SV=1;tr|A2RHC3|A2RHC3_LACLMPs105proteinOS=Lactococcuslactissubsp.cremoris(strainMG1363)GN=ps105PE=4SV=1
tr|A2RHC8|A2RHC8_LACLM	tr|A2RHC8|A2RHC8_LACLM	4	6	4	5	3	4	6	6	4	4	5	6	9	9	9	41.5	41.5	41.5	29.306	0	113.86	28191000	89	1362400	1956000	4455500	2387200	2374000	2868600	3840600	3564300	2920800	5338900	3206800	4405800	tr|A2RHC8|A2RHC8_LACLMUncharacterizedproteinOS=Lactococcuslactissubsp.cremoris(strainMG1363)GN=llmg_0056PE=4SV=1	tr|A2RHC8|A2RHC8_LACLMUncharacterizedproteinOS=Lactococcuslactissubsp.cremoris(strainMG1363)GN=llmg_0056PE=4SV=1
tr|A2RHC9|A2RHC9_LACLM	tr|A2RHC9|A2RHC9_LACLM	4	2	4	5	6	5	5	4	4	5	5	5	10	10	10	62.8	62.8	62.8	13.423	0	28.424	39219000	64	9478200	11758000	9148800	8636400	8462200	7549900	8265300	9410200	10301000	9720000	13686000	14027000	tr|A2RHC9|A2RHC9_LACLMUncharacterizedproteinOS=Lactococcuslactissubsp.cremoris(strainMG1363)GN=llmg_0057PE=4SV=1	tr|A2RHC9|A2RHC9_LACLMUncharacterizedproteinOS=Lactococcuslactissubsp.cremoris(strainMG1363)GN=llmg_0057PE=4SV=1
tr|A2RHD0|A2RHD0_LACLM	tr|A2RHD0|A2RHD0_LACLM	1	5	1	0	0	0	0	0	0	0	0	0	6	6	6	33.7	33.7	33.7	18.106	0	5.1508	2651700	6	0	646270	0	0	0	0	0	0	0	0	0	0	tr|A2RHD0|A2RHD0_LACLMUncharacterizedproteinOS=Lactococcuslactissubsp.cremoris(strainMG1363)GN=llmg_0059PE=4SV=1	tr|A2RHD0|A2RHD0_LACLMUncharacterizedproteinOS=Lactococcuslactissubsp.cremoris(strainMG1363)GN=llmg_0059PE=4SV=1
tr|A2RHD4|A2RHD4_LACLM	tr|A2RHD4|A2RHD4_LACLM	2	3	3	0	2	1	0	2	1	8	3	3	9	9	9	22.2	22.2	22.2	58.587	0	39.674	36669000	49	2279600	2566400	3046800	0	1896000	0	0	1989100	0	3692400	4083300	3402400	tr|A2RHD4|A2RHD4_LACLMUncharacterizedproteinOS=Lactococcuslactissubsp.cremoris(strainMG1363)GN=llmg_0063PE=4SV=1	tr|A2RHD4|A2RHD4_LACLMUncharacterizedproteinOS=Lactococcuslactissubsp.cremoris(strainMG1363)GN=llmg_0063PE=4SV=1
tr|A2RHD6|A2RHD6_LACLM	tr|A2RHD6|A2RHD6_LACLM	5	5	4	2	2	1	4	4	3	1	1	2	8	8	8	67.6	67.6	67.6	19.41	0	35.519	94560000	82	9865500	22310000	12893000	8511100	7044200	0	7748500	11940000	12484000	0	0	10466000	tr|A2RHD6|A2RHD6_LACLMUncharacterizedproteinOS=Lactococcuslactissubsp.cremoris(strainMG1363)GN=llmg_0065PE=4SV=1	tr|A2RHD6|A2RHD6_LACLMUncharacterizedproteinOS=Lactococcuslactissubsp.cremoris(strainMG1363)GN=llmg_0065PE=4SV=1
tr|A2RHD7|A2RHD7_LACLM	tr|A2RHD7|A2RHD7_LACLM	19	20	13	12	13	13	10	12	11	13	11	11	22	22	22	55.5	55.5	55.5	43.219	0	193.86	421680000	333	27043000	34842000	28997000	49024000	47247000	49206000	23070000	24505000	36302000	36579000	42654000	36271000	tr|A2RHD7|A2RHD7_LACLMAraTproteinOS=Lactococcuslactissubsp.cremoris(strainMG1363)GN=araTPE=3SV=1	tr|A2RHD7|A2RHD7_LACLMAraTproteinOS=Lactococcuslactissubsp.cremoris(strainMG1363)GN=araTPE=3SV=1
tr|A2RHD9|A2RHD9_LACLM	tr|A2RHD9|A2RHD9_LACLM	0	2	2	3	1	2	2	2	2	2	2	2	4	4	4	16.7	16.7	16.7	34.991	0	17.498	3618400	16	0	0	410760	1553700	0	994530	1021200	768450	929820	981540	462270	517210	tr|A2RHD9|A2RHD9_LACLMUncharacterizedproteinOS=Lactococcuslactissubsp.cremoris(strainMG1363)GN=llmg_0069PE=4SV=1	tr|A2RHD9|A2RHD9_LACLMUncharacterizedproteinOS=Lactococcuslactissubsp.cremoris(strainMG1363)GN=llmg_0069PE=4SV=1
tr|A2RHE1|A2RHE1_LACLM	tr|A2RHE1|A2RHE1_LACLM	23	24	19	16	11	16	17	16	18	10	17	10	25	25	25	80.1	80.1	80.1	49.865	0	323.31	10968000000	1290	194220000	258410000	446900000	314640000	244540000	174510000	181010000	170800000	190040000	243630000	217570000	222940000	tr|A2RHE1|A2RHE1_LACLMDihydrolipoyldehydrogenaseOS=Lactococcuslactissubsp.cremoris(strainMG1363)GN=pdhDPE=4SV=1	tr|A2RHE1|A2RHE1_LACLMDihydrolipoyldehydrogenaseOS=Lactococcuslactissubsp.cremoris(strainMG1363)GN=pdhDPE=4SV=1
tr|A2RHE2|A2RHE2_LACLM	tr|A2RHE2|A2RHE2_LACLM	27	31	25	17	19	19	18	20	18	18	20	19	33	33	33	68.1	68.1	68.1	56.33	0	323.31	28594000000	1859	841570000	605930000	640330000	360400000	376580000	315050000	324220000	278830000	255800000	366400000	267650000	241010000	tr|A2RHE2|A2RHE2_LACLMPdhCproteinOS=Lactococcuslactissubsp.cremoris(strainMG1363)GN=pdhCPE=3SV=1	tr|A2RHE2|A2RHE2_LACLMPdhCproteinOS=Lactococcuslactissubsp.cremoris(strainMG1363)GN=pdhCPE=3SV=1
tr|A2RHE3|A2RHE3_LACLM	tr|A2RHE3|A2RHE3_LACLM	24	25	22	20	19	21	19	20	20	18	17	16	25	25	25	74.2	74.2	74.2	35.165	0	323.31	6097800000	1277	464030000	831310000	818690000	795120000	558800000	581100000	532800000	544060000	559180000	421650000	535270000	419340000	tr|A2RHE3|A2RHE3_LACLMPdhBproteinOS=Lactococcuslactissubsp.cremoris(strainMG1363)GN=pdhBPE=4SV=1	tr|A2RHE3|A2RHE3_LACLMPdhBproteinOS=Lactococcuslactissubsp.cremoris(strainMG1363)GN=pdhBPE=4SV=1
tr|A2RHE4|A2RHE4_LACLM	tr|A2RHE4|A2RHE4_LACLM	19	21	19	16	14	18	17	18	17	12	14	13	25	25	25	74.9	74.9	74.9	41.351	0	323.31	4339600000	1024	397140000	460340000	362030000	310910000	320610000	218560000	233480000	241910000	245760000	241300000	281440000	215520000	tr|A2RHE4|A2RHE4_LACLMPdhAproteinOS=Lactococcuslactissubsp.cremoris(strainMG1363)GN=pdhAPE=4SV=1	tr|A2RHE4|A2RHE4_LACLMPdhAproteinOS=Lactococcuslactissubsp.cremoris(strainMG1363)GN=pdhAPE=4SV=1
tr|A2RHE5|A2RHE5_LACLM	tr|A2RHE5|A2RHE5_LACLM	11	15	8	13	10	12	10	14	11	7	9	6	19	19	19	58	58	58	37.783	0	323.31	586120000	304	59499000	59428000	34849000	59565000	40632000	72032000	72745000	61003000	49962000	43288000	40817000	35434000	tr|A2RHE5|A2RHE5_LACLMLipoate--proteinligaseOS=Lactococcuslactissubsp.cremoris(strainMG1363)GN=lplLPE=4SV=1	tr|A2RHE5|A2RHE5_LACLMLipoate--proteinligaseOS=Lactococcuslactissubsp.cremoris(strainMG1363)GN=lplLPE=4SV=1
tr|A2RHE7|A2RHE7_LACLM	tr|A2RHE7|A2RHE7_LACLM	4	4	5	4	1	6	4	5	1	2	2	4	12	12	12	47.2	47.2	47.2	24.788	0	21.719	35998000	54	3633800	4234400	5562700	5592800	0	2631800	3752600	2856300	0	0	2963900	3673300	tr|A2RHE7|A2RHE7_LACLMUncharacterizedproteinOS=Lactococcuslactissubsp.cremoris(strainMG1363)GN=llmg_0077PE=4SV=1	tr|A2RHE7|A2RHE7_LACLMUncharacterizedproteinOS=Lactococcuslactissubsp.cremoris(strainMG1363)GN=llmg_0077PE=4SV=1
tr|A2RHE9|A2RHE9_LACLM	tr|A2RHE9|A2RHE9_LACLM	16	20	13	8	8	14	9	10	9	9	11	8	22	22	22	76.5	76.5	76.5	38.119	0	248.44	1099500000	457	92952000	131360000	54143000	121030000	87472000	101780000	117850000	79524000	96068000	102190000	71824000	70421000	tr|A2RHE9|A2RHE9_LACLMTryptophan--tRNAligaseOS=Lactococcuslactissubsp.cremoris(strainMG1363)GN=trpSPE=3SV=1	tr|A2RHE9|A2RHE9_LACLMTryptophan--tRNAligaseOS=Lactococcuslactissubsp.cremoris(strainMG1363)GN=trpSPE=3SV=1
tr|A2RHF0|A2RHF0_LACLM	tr|A2RHF0|A2RHF0_LACLM	3	2	3	2	2	3	2	2	2	1	1	1	4	4	4	39.3	39.3	39.3	15.32	0	78.263	485870000	246	88533000	64132000	87010000	8265700	20119000	24354000	34543000	17598000	16489000	0	0	0	tr|A2RHF0|A2RHF0_LACLMOsmCproteinOS=Lactococcuslactissubsp.cremoris(strainMG1363)GN=osmCPE=4SV=1	tr|A2RHF0|A2RHF0_LACLMOsmCproteinOS=Lactococcuslactissubsp.cremoris(strainMG1363)GN=osmCPE=4SV=1
tr|A2RHF4|A2RHF4_LACLM	tr|A2RHF4|A2RHF4_LACLM	6	8	6	7	7	6	7	8	8	8	7	7	9	9	9	44.4	44.4	44.4	30.331	0	188.53	619150000	174	39096000	45921000	83817000	102990000	111580000	174150000	101990000	106970000	107320000	109710000	117580000	120830000	tr|A2RHF4|A2RHF4_LACLMUncharacterizedproteinOS=Lactococcuslactissubsp.cremoris(strainMG1363)GN=llmg_0084PE=4SV=1	tr|A2RHF4|A2RHF4_LACLMUncharacterizedproteinOS=Lactococcuslactissubsp.cremoris(strainMG1363)GN=llmg_0084PE=4SV=1
tr|A2RHF5|A2RHF5_LACLM	tr|A2RHF5|A2RHF5_LACLM	35	32	30	27	28	27	32	32	31	23	28	25	37	37	37	73	73	73	61.518	0	323.31	25963000000	2043	759360000	367930000	786660000	621420000	621910000	571930000	630650000	612510000	510350000	524750000	413920000	531770000	tr|A2RHF5|A2RHF5_LACLMUncharacterizedproteinOS=Lactococcuslactissubsp.cremoris(strainMG1363)GN=llmg_0085PE=3SV=1	tr|A2RHF5|A2RHF5_LACLMUncharacterizedproteinOS=Lactococcuslactissubsp.cremoris(strainMG1363)GN=llmg_0085PE=3SV=1
tr|A2RHG0|A2RHG0_LACLM	tr|A2RHG0|A2RHG0_LACLM	3	2	2	1	1	2	3	2	2	2	0	2	4	4	4	22.3	22.3	22.3	21.582	0	61.657	15261000	43	1191500	1204500	1444700	0	0	1699800	4725800	3139000	3273400	1570800	0	1898900	tr|A2RHG0|A2RHG0_LACLMUncharacterizedproteinOS=Lactococcuslactissubsp.cremoris(strainMG1363)GN=llmg_0089PE=4SV=1	tr|A2RHG0|A2RHG0_LACLMUncharacterizedproteinOS=Lactococcuslactissubsp.cremoris(strainMG1363)GN=llmg_0089PE=4SV=1
tr|A2RHG2|A2RHG2_LACLM	tr|A2RHG2|A2RHG2_LACLM	3	4	0	0	0	0	0	0	0	0	0	0	5	5	5	21.6	21.6	21.6	46.278	0.00068966	2.3855	12128000	6	959200	1080900	0	0	0	0	0	0	0	0	0	0	tr|A2RHG2|A2RHG2_LACLMCysDproteinOS=Lactococcuslactissubsp.cremoris(strainMG1363)GN=cysDPE=3SV=1	tr|A2RHG2|A2RHG2_LACLMCysDproteinOS=Lactococcuslactissubsp.cremoris(strainMG1363)GN=cysDPE=3SV=1
tr|A2RHG3|A2RHG3_LACLM	tr|A2RHG3|A2RHG3_LACLM	12	10	12	9	6	9	11	10	9	13	10	11	16	16	16	65.7	65.7	65.7	30.822	0	323.31	326430000	267	37669000	49104000	36631000	31635000	22577000	37324000	40570000	27262000	26608000	41073000	32522000	33885000	tr|A2RHG3|A2RHG3_LACLMUncharacterizedproteinOS=Lactococcuslactissubsp.cremoris(strainMG1363)GN=llmg_0092PE=3SV=1	tr|A2RHG3|A2RHG3_LACLMUncharacterizedproteinOS=Lactococcuslactissubsp.cremoris(strainMG1363)GN=llmg_0092PE=3SV=1
tr|A2RHG4|A2RHG4_LACLM	tr|A2RHG4|A2RHG4_LACLM	7	8	7	8	8	7	9	7	7	6	6	6	9	9	9	73.5	73.5	73.5	16.597	0	85.565	574720000	375	40747000	94618000	93322000	126160000	74919000	65377000	91296000	111500000	107660000	72365000	88134000	92459000	tr|A2RHG4|A2RHG4_LACLMUncharacterizedproteinOS=Lactococcuslactissubsp.cremoris(strainMG1363)GN=llmg_0093PE=4SV=1	tr|A2RHG4|A2RHG4_LACLMUncharacterizedproteinOS=Lactococcuslactissubsp.cremoris(strainMG1363)GN=llmg_0093PE=4SV=1
tr|A2RHH3|A2RHH3_LACLM	tr|A2RHH3|A2RHH3_LACLM	11	8	6	5	5	7	4	6	6	5	5	6	14	14	12	54	54	51	29.863	0	95.966	61198000	119	8734400	7638900	5239400	3526400	8085800	2222400	3591300	4829400	4872200	4030700	3898300	6164100	tr|A2RHH3|A2RHH3_LACLMParAproteinOS=Lactococcuslactissubsp.cremoris(strainMG1363)GN=parAPE=4SV=1	tr|A2RHH3|A2RHH3_LACLMParAproteinOS=Lactococcuslactissubsp.cremoris(strainMG1363)GN=parAPE=4SV=1
tr|A2RHH4|A2RHH4_LACLM	tr|A2RHH4|A2RHH4_LACLM	2	3	1	2	0	2	1	1	1	1	1	2	6	6	6	16.5	16.5	16.5	46.875	0.0073431	1.3941	16364000	10	0	0	0	0	0	0	0	0	0	0	0	53740000	tr|A2RHH4|A2RHH4_LACLMCshAproteinOS=Lactococcuslactissubsp.cremoris(strainMG1363)GN=cshAPE=4SV=1	tr|A2RHH4|A2RHH4_LACLMCshAproteinOS=Lactococcuslactissubsp.cremoris(strainMG1363)GN=cshAPE=4SV=1
tr|A2RHH6|A2RHH6_LACLM	tr|A2RHH6|A2RHH6_LACLM	5	5	5	3	3	2	6	5	5	3	2	5	6	6	6	58.1	58.1	58.1	17.856	0	139.21	102960000	163	13452000	18196000	13236000	18557000	8926800	10493000	27030000	25911000	31167000	15268000	24168000	17599000	tr|A2RHH6|A2RHH6_LACLMUncharacterizedproteinOS=Lactococcuslactissubsp.cremoris(strainMG1363)GN=llmg_0105PE=4SV=1	tr|A2RHH6|A2RHH6_LACLMUncharacterizedproteinOS=Lactococcuslactissubsp.cremoris(strainMG1363)GN=llmg_0105PE=4SV=1
tr|A2RHH7|A2RHH7_LACLM	tr|A2RHH7|A2RHH7_LACLM	23	23	17	16	13	13	17	17	14	9	13	13	23	23	23	59	59	59	58.304	0	323.31	3963500000	480	99579000	91905000	97946000	64364000	56954000	83895000	122060000	79698000	88872000	36058000	62303000	66439000	tr|A2RHH7|A2RHH7_LACLMUncharacterizedproteinOS=Lactococcuslactissubsp.cremoris(strainMG1363)GN=llmg_0106PE=3SV=1	tr|A2RHH7|A2RHH7_LACLMUncharacterizedproteinOS=Lactococcuslactissubsp.cremoris(strainMG1363)GN=llmg_0106PE=3SV=1
tr|A2RHH9|A2RHH9_LACLM	tr|A2RHH9|A2RHH9_LACLM	2	2	1	2	1	1	1	1	1	1	1	1	3	3	3	22.6	22.6	22.6	26.753	0	8.5352	15107000	20	577380	753710	0	0	0	0	0	0	0	0	0	0	tr|A2RHH9|A2RHH9_LACLMUncharacterizedproteinOS=Lactococcuslactissubsp.cremoris(strainMG1363)GN=llmg_0108PE=4SV=1	tr|A2RHH9|A2RHH9_LACLMUncharacterizedproteinOS=Lactococcuslactissubsp.cremoris(strainMG1363)GN=llmg_0108PE=4SV=1
tr|A2RHI2|A2RHI2_LACLM	tr|A2RHI2|A2RHI2_LACLM	10	9	8	11	11	11	10	10	9	11	8	10	12	12	12	53.6	53.6	53.6	27.74	0	120.62	667100000	226	69259000	66590000	82691000	31087000	54282000	55447000	40655000	32392000	37415000	63690000	61477000	51238000	tr|A2RHI2|A2RHI2_LACLMRibosomalRNAsmallsubunitmethyltransferaseEOS=Lactococcuslactissubsp.cremoris(strainMG1363)GN=llmg_0111PE=3SV=1	tr|A2RHI2|A2RHI2_LACLMRibosomalRNAsmallsubunitmethyltransferaseEOS=Lactococcuslactissubsp.cremoris(strainMG1363)GN=llmg_0111PE=3SV=1
tr|A2RHI3|A2RHI3_LACLM	tr|A2RHI3|A2RHI3_LACLM	2	4	3	5	5	4	4	4	5	2	4	2	8	8	8	38.1	38.1	38.1	35.511	0	85.804	22928000	56	1536500	1266200	2523300	3014200	2740000	3160100	3343400	2897000	3450900	3896800	2516800	2776800	tr|A2RHI3|A2RHI3_LACLMUncharacterizedproteinOS=Lactococcuslactissubsp.cremoris(strainMG1363)GN=llmg_0112PE=4SV=1	tr|A2RHI3|A2RHI3_LACLMUncharacterizedproteinOS=Lactococcuslactissubsp.cremoris(strainMG1363)GN=llmg_0112PE=4SV=1
tr|A2RHI4|A2RHI4_LACLM	tr|A2RHI4|A2RHI4_LACLM	34	33	24	21	17	15	21	18	19	14	17	11	40	40	40	49.6	49.6	49.6	83.853	0	271.96	3628700000	472	64627000	55968000	53003000	72201000	38758000	28612000	21637000	28203000	27150000	46227000	33931000	39004000	tr|A2RHI4|A2RHI4_LACLMRelAproteinOS=Lactococcuslactissubsp.cremoris(strainMG1363)GN=relAPE=3SV=1	tr|A2RHI4|A2RHI4_LACLMRelAproteinOS=Lactococcuslactissubsp.cremoris(strainMG1363)GN=relAPE=3SV=1
tr|A2RHI5|A2RHI5_LACLM	tr|A2RHI5|A2RHI5_LACLM	4	5	4	4	4	6	4	4	4	5	4	4	10	10	10	23.5	23.5	23.5	35.471	0	14.744	27668000	62	7953500	5041400	7570200	4378900	14243000	6896200	5821100	7014200	8057300	8694900	10073000	13811000	tr|A2RHI5|A2RHI5_LACLMUncharacterizedproteinOS=Lactococcuslactissubsp.cremoris(strainMG1363)GN=llmg_0114PE=4SV=1	tr|A2RHI5|A2RHI5_LACLMUncharacterizedproteinOS=Lactococcuslactissubsp.cremoris(strainMG1363)GN=llmg_0114PE=4SV=1
tr|A2RHI7|A2RHI7_LACLM	tr|A2RHI7|A2RHI7_LACLM	2	3	2	1	1	2	2	2	2	3	2	2	3	3	3	11.4	11.4	11.4	39.353	0	39.557	2637300	32	776700	141890	728220	0	0	0	281480	368330	543410	390900	378450	565300	tr|A2RHI7|A2RHI7_LACLMUncharacterizedproteinOS=Lactococcuslactissubsp.cremoris(strainMG1363)GN=llmg_0116PE=4SV=1	tr|A2RHI7|A2RHI7_LACLMUncharacterizedproteinOS=Lactococcuslactissubsp.cremoris(strainMG1363)GN=llmg_0116PE=4SV=1
tr|A2RHI8|A2RHI8_LACLM	tr|A2RHI8|A2RHI8_LACLM	3	3	2	3	3	3	4	4	3	3	3	4	4	4	4	27.1	27.1	27.1	24.027	0	53.254	33909000	72	3030900	2345100	3952300	5339900	5633500	8680000	11476000	9007400	10942000	11117000	4375600	6783800	tr|A2RHI8|A2RHI8_LACLMUncharacterizedproteinOS=Lactococcuslactissubsp.cremoris(strainMG1363)GN=llmg_0117PE=4SV=1	tr|A2RHI8|A2RHI8_LACLMUncharacterizedproteinOS=Lactococcuslactissubsp.cremoris(strainMG1363)GN=llmg_0117PE=4SV=1
tr|A2RHI9|A2RHI9_LACLM	tr|A2RHI9|A2RHI9_LACLM	0	2	0	1	0	0	1	1	0	1	1	2	4	4	4	6.2	6.2	6.2	49.58	0.0033693	1.7281	3350000	14	0	0	0	0	0	0	0	0	0	1308200	0	0	tr|A2RHI9|A2RHI9_LACLMCtrAproteinOS=Lactococcuslactissubsp.cremoris(strainMG1363)GN=ctrAPE=4SV=1	tr|A2RHI9|A2RHI9_LACLMCtrAproteinOS=Lactococcuslactissubsp.cremoris(strainMG1363)GN=ctrAPE=4SV=1
tr|A2RHJ0|A2RHJ0_LACLM	tr|A2RHJ0|A2RHJ0_LACLM	12	12	11	15	12	11	15	15	13	13	12	14	16	16	16	51.8	51.8	51.8	25.538	0	94.977	684800000	521	67334000	65868000	40148000	49359000	60348000	50604000	40475000	46379000	53425000	62752000	62438000	72979000	tr|A2RHJ0|A2RHJ0_LACLMUncharacterizedproteinOS=Lactococcuslactissubsp.cremoris(strainMG1363)GN=llmg_0119PE=4SV=1	tr|A2RHJ0|A2RHJ0_LACLMUncharacterizedproteinOS=Lactococcuslactissubsp.cremoris(strainMG1363)GN=llmg_0119PE=4SV=1
tr|A2RHJ1|A2RHJ1_LACLM	tr|A2RHJ1|A2RHJ1_LACLM	3	5	5	2	2	1	2	2	2	1	1	3	5	5	5	26.7	26.7	26.7	19.826	0	8.4335	12738000	49	3402900	2832300	3442400	838880	1280700	0	1513200	1480300	1015500	0	0	2081400	tr|A2RHJ1|A2RHJ1_LACLMRmaDproteinOS=Lactococcuslactissubsp.cremoris(strainMG1363)GN=rmaDPE=4SV=1	tr|A2RHJ1|A2RHJ1_LACLMRmaDproteinOS=Lactococcuslactissubsp.cremoris(strainMG1363)GN=rmaDPE=4SV=1
tr|A2RHJ6|A2RHJ6_LACLM	tr|A2RHJ6|A2RHJ6_LACLM	13	15	10	16	14	12	14	15	12	10	14	9	25	25	19	72.8	72.8	62.9	39.252	0	255.93	1414400000	574	150200000	212990000	145430000	158160000	139420000	256820000	154360000	107210000	123600000	123950000	94609000	97038000	tr|A2RHJ6|A2RHJ6_LACLMPhospho-2-dehydro-3-deoxyheptonatealdolaseOS=Lactococcuslactissubsp.cremoris(strainMG1363)GN=aroFPE=3SV=1	tr|A2RHJ6|A2RHJ6_LACLMPhospho-2-dehydro-3-deoxyheptonatealdolaseOS=Lactococcuslactissubsp.cremoris(strainMG1363)GN=aroFPE=3SV=1
tr|A2RHJ7|A2RHJ7_LACLM	tr|A2RHJ7|A2RHJ7_LACLM	3	4	4	4	4	4	4	4	4	4	4	3	4	4	4	81.8	81.8	81.8	9.1263	0	163.92	6621500000	4572	543150000	670770000	746040000	657080000	1389700000	355260000	559250000	561590000	589520000	585450000	375900000	267710000	tr|A2RHJ7|A2RHJ7_LACLMPtsHproteinOS=Lactococcuslactissubsp.cremoris(strainMG1363)GN=ptsHPE=4SV=1	tr|A2RHJ7|A2RHJ7_LACLMPtsHproteinOS=Lactococcuslactissubsp.cremoris(strainMG1363)GN=ptsHPE=4SV=1
tr|A2RHJ8|A2RHJ8_LACLM	tr|A2RHJ8|A2RHJ8_LACLM	44	46	44	39	42	40	40	39	39	36	39	34	48	48	48	75.5	75.5	75.5	62.576	0	323.31	100700000000	7643	3409600000	3112000000	4018600000	2530200000	2602000000	2725900000	3216100000	2536700000	2601300000	2777000000	2665500000	2117300000	tr|A2RHJ8|A2RHJ8_LACLMPhosphoenolpyruvate-proteinphosphotransferaseOS=Lactococcuslactissubsp.cremoris(strainMG1363)GN=ptsIPE=3SV=1	tr|A2RHJ8|A2RHJ8_LACLMPhosphoenolpyruvate-proteinphosphotransferaseOS=Lactococcuslactissubsp.cremoris(strainMG1363)GN=ptsIPE=3SV=1
tr|A2RHK1|A2RHK1_LACLM	tr|A2RHK1|A2RHK1_LACLM	4	5	5	6	4	6	5	5	4	6	4	4	9	9	9	34.1	34.1	34.1	35.617	0	28.531	232200000	68	5680100	3996500	6221000	8605600	9437000	4089300	6280500	9403000	8994000	12332000	9470300	18174000	tr|A2RHK1|A2RHK1_LACLMUncharacterizedproteinOS=Lactococcuslactissubsp.cremoris(strainMG1363)GN=llmg_0130PE=4SV=1	tr|A2RHK1|A2RHK1_LACLMUncharacterizedproteinOS=Lactococcuslactissubsp.cremoris(strainMG1363)GN=llmg_0130PE=4SV=1
tr|A2RHK2|A2RHK2_LACLM	tr|A2RHK2|A2RHK2_LACLM	3	2	1	0	0	0	0	0	0	0	0	0	4	4	4	10.2	10.2	10.2	49.701	0	9.0561	10821000	6	733830	0	0	0	0	0	0	0	0	0	0	0	tr|A2RHK2|A2RHK2_LACLMUncharacterizedproteinOS=Lactococcuslactissubsp.cremoris(strainMG1363)GN=llmg_0131PE=4SV=1	tr|A2RHK2|A2RHK2_LACLMUncharacterizedproteinOS=Lactococcuslactissubsp.cremoris(strainMG1363)GN=llmg_0131PE=4SV=1
tr|A2RHK4|A2RHK4_LACLM	tr|A2RHK4|A2RHK4_LACLM	1	2	1	0	1	1	0	0	0	3	1	2	3	3	3	6.5	6.5	6.5	41.643	0	12.017	28311000	21	1330800	2062400	5077100	0	0	0	0	0	0	432060	0	1408700	tr|A2RHK4|A2RHK4_LACLMBltproteinOS=Lactococcuslactissubsp.cremoris(strainMG1363)GN=bltPE=4SV=1	tr|A2RHK4|A2RHK4_LACLMBltproteinOS=Lactococcuslactissubsp.cremoris(strainMG1363)GN=bltPE=4SV=1
tr|A2RHK7|A2RHK7_LACLM	tr|A2RHK7|A2RHK7_LACLM	1	1	1	1	1	0	1	1	1	1	1	1	2	2	2	13.3	13.3	13.3	19.98	0	17.865	7632200	15	0	0	0	0	0	0	0	0	0	0	0	852090	tr|A2RHK7|A2RHK7_LACLMUncharacterizedproteinOS=Lactococcuslactissubsp.cremoris(strainMG1363)GN=llmg_0136PE=4SV=1	tr|A2RHK7|A2RHK7_LACLMUncharacterizedproteinOS=Lactococcuslactissubsp.cremoris(strainMG1363)GN=llmg_0136PE=4SV=1
tr|A2RHL2|A2RHL2_LACLM	tr|A2RHL2|A2RHL2_LACLM	3	5	3	2	2	1	4	3	4	1	1	2	7	7	7	40.3	40.3	40.3	22.009	0	22.717	12311000	79	2494300	4174100	2192200	1982700	0	0	2488700	2544200	1634200	0	0	0	tr|A2RHL2|A2RHL2_LACLMUncharacterizedproteinOS=Lactococcuslactissubsp.cremoris(strainMG1363)GN=llmg_0141PE=4SV=1	tr|A2RHL2|A2RHL2_LACLMUncharacterizedproteinOS=Lactococcuslactissubsp.cremoris(strainMG1363)GN=llmg_0141PE=4SV=1
tr|A2RHL4|A2RHL4_LACLM	tr|A2RHL4|A2RHL4_LACLM	7	6	6	5	5	6	6	6	6	7	6	7	8	8	8	26	26	26	30.307	0	48.157	476070000	395	52350000	33605000	36869000	19388000	29146000	73768000	22317000	19324000	22817000	37470000	31219000	40506000	tr|A2RHL4|A2RHL4_LACLMMembraneproteininsertaseYidCOS=Lactococcuslactissubsp.cremoris(strainMG1363)GN=yidCPE=3SV=1	tr|A2RHL4|A2RHL4_LACLMMembraneproteininsertaseYidCOS=Lactococcuslactissubsp.cremoris(strainMG1363)GN=yidCPE=3SV=1
tr|A2RHL5|A2RHL5_LACLM	tr|A2RHL5|A2RHL5_LACLM	26	27	18	19	19	20	19	18	18	20	16	18	30	30	30	73.7	73.7	73.7	33.76	0	323.31	1351100000	1064	178720000	203620000	140860000	135350000	165790000	183660000	137100000	144790000	139160000	250310000	125990000	127920000	tr|A2RHL5|A2RHL5_LACLMUncharacterizedproteinOS=Lactococcuslactissubsp.cremoris(strainMG1363)GN=llmg_0144PE=4SV=1	tr|A2RHL5|A2RHL5_LACLMUncharacterizedproteinOS=Lactococcuslactissubsp.cremoris(strainMG1363)GN=llmg_0144PE=4SV=1
tr|A2RHL7|A2RHL7_LACLM	tr|A2RHL7|A2RHL7_LACLM	10	11	4	6	5	4	2	3	5	4	3	3	12	12	12	48.8	48.8	48.8	33.971	0	151.22	81428000	119	7561500	10178000	8990200	10196000	9405800	6025100	5898100	7215600	7960500	4094400	5089500	3754000	tr|A2RHL7|A2RHL7_LACLMUncharacterizedproteinOS=Lactococcuslactissubsp.cremoris(strainMG1363)GN=llmg_0146PE=4SV=1	tr|A2RHL7|A2RHL7_LACLMUncharacterizedproteinOS=Lactococcuslactissubsp.cremoris(strainMG1363)GN=llmg_0146PE=4SV=1
tr|A2RHM5|A2RHM5_LACLM	tr|A2RHM5|A2RHM5_LACLM	1	2	2	1	0	1	1	1	0	0	0	0	2	2	2	10	10	10	28.717	0	3.0978	2124400	8	0	512710	0	0	0	0	0	0	0	0	0	0	tr|A2RHM5|A2RHM5_LACLMCbrproteinOS=Lactococcuslactissubsp.cremoris(strainMG1363)GN=cbrPE=4SV=1	tr|A2RHM5|A2RHM5_LACLMCbrproteinOS=Lactococcuslactissubsp.cremoris(strainMG1363)GN=cbrPE=4SV=1
tr|A2RHM8|A2RHM8_LACLM	tr|A2RHM8|A2RHM8_LACLM	3	5	1	1	1	0	1	2	1	1	0	2	6	6	6	51.4	51.4	51.4	21.339	0	39.501	17160000	27	2532200	4176000	0	0	0	0	0	0	0	0	0	3993700	tr|A2RHM8|A2RHM8_LACLMTetRproteinOS=Lactococcuslactissubsp.cremoris(strainMG1363)GN=tetRPE=4SV=1	tr|A2RHM8|A2RHM8_LACLMTetRproteinOS=Lactococcuslactissubsp.cremoris(strainMG1363)GN=tetRPE=4SV=1
tr|A2RHN1|A2RHN1_LACLM	tr|A2RHN1|A2RHN1_LACLM	1	0	0	1	1	0	1	1	2	2	1	4	5	5	5	23.1	23.1	23.1	24.029	0	3.4055	5399800	17	0	0	0	0	0	0	0	0	0	1949100	0	4015900	tr|A2RHN1|A2RHN1_LACLMUncharacterizedproteinOS=Lactococcuslactissubsp.cremoris(strainMG1363)GN=llmg_0160PE=4SV=1	tr|A2RHN1|A2RHN1_LACLMUncharacterizedproteinOS=Lactococcuslactissubsp.cremoris(strainMG1363)GN=llmg_0160PE=4SV=1
tr|A2RHN2|A2RHN2_LACLM	tr|A2RHN2|A2RHN2_LACLM	4	3	5	3	2	3	6	5	5	4	5	6	7	7	7	39.6	39.6	39.6	20.938	0	87.484	60974000	64	5425100	6899100	6712700	6716900	5532800	6548700	8843600	6418400	7280400	9629800	10407000	7741800	tr|A2RHN2|A2RHN2_LACLMUncharacterizedproteinOS=Lactococcuslactissubsp.cremoris(strainMG1363)GN=llmg_0161PE=4SV=1	tr|A2RHN2|A2RHN2_LACLMUncharacterizedproteinOS=Lactococcuslactissubsp.cremoris(strainMG1363)GN=llmg_0161PE=4SV=1
tr|A2RHN6|A2RHN6_LACLM	tr|A2RHN6|A2RHN6_LACLM	1	1	1	0	1	1	2	2	2	2	2	2	2	2	2	12.7	12.7	12.7	25.796	0	10.448	10944000	38	0	0	0	0	0	0	3541600	2355600	2204000	2276400	2255100	3505600	tr|A2RHN6|A2RHN6_LACLMUncharacterizedproteinOS=Lactococcuslactissubsp.cremoris(strainMG1363)GN=llmg_0165PE=4SV=1	tr|A2RHN6|A2RHN6_LACLMUncharacterizedproteinOS=Lactococcuslactissubsp.cremoris(strainMG1363)GN=llmg_0165PE=4SV=1
tr|A2RHN7|A2RHN7_LACLM	tr|A2RHN7|A2RHN7_LACLM	9	10	9	7	7	8	11	10	10	10	9	8	13	13	13	82.1	82.1	82.1	16.51	0	137.98	367570000	258	44445000	51031000	43361000	107760000	52588000	75084000	74708000	48820000	49107000	80930000	56493000	32490000	tr|A2RHN7|A2RHN7_LACLMUncharacterizedproteinOS=Lactococcuslactissubsp.cremoris(strainMG1363)GN=llmg_0167PE=4SV=1	tr|A2RHN7|A2RHN7_LACLMUncharacterizedproteinOS=Lactococcuslactissubsp.cremoris(strainMG1363)GN=llmg_0167PE=4SV=1
tr|A2RHN8|A2RHN8_LACLM	tr|A2RHN8|A2RHN8_LACLM	6	7	7	4	6	8	9	7	6	4	5	6	10	10	10	47.9	47.9	47.9	28.517	0	159.38	93848000	176	19317000	13173000	13953000	7808800	7169200	7298300	7125100	8065800	6591100	9358300	5961200	5645700	tr|A2RHN8|A2RHN8_LACLMUncharacterizedproteinOS=Lactococcuslactissubsp.cremoris(strainMG1363)GN=llmg_0168PE=4SV=1	tr|A2RHN8|A2RHN8_LACLMUncharacterizedproteinOS=Lactococcuslactissubsp.cremoris(strainMG1363)GN=llmg_0168PE=4SV=1
tr|A2RHP0|A2RHP0_LACLM	tr|A2RHP0|A2RHP0_LACLM	15	17	12	12	13	11	12	10	14	13	12	14	19	19	19	29.7	29.7	29.7	58.288	0	323.31	585280000	716	29570000	34269000	24239000	56826000	31528000	26520000	20568000	30273000	21932000	35507000	36191000	36252000	tr|A2RHP0|A2RHP0_LACLMUncharacterizedproteinOS=Lactococcuslactissubsp.cremoris(strainMG1363)GN=llmg_0170PE=4SV=1	tr|A2RHP0|A2RHP0_LACLMUncharacterizedproteinOS=Lactococcuslactissubsp.cremoris(strainMG1363)GN=llmg_0170PE=4SV=1
tr|A2RHP1|A2RHP1_LACLM	tr|A2RHP1|A2RHP1_LACLM	10	12	11	10	9	9	8	9	8	9	10	9	15	15	15	44.8	44.8	44.8	45.513	0	174.61	847520000	188	72612000	74050000	72258000	60307000	65686000	84236000	73856000	61214000	69706000	66452000	74896000	49497000	tr|A2RHP1|A2RHP1_LACLMAspCproteinOS=Lactococcuslactissubsp.cremoris(strainMG1363)GN=aspCPE=4SV=1	tr|A2RHP1|A2RHP1_LACLMAspCproteinOS=Lactococcuslactissubsp.cremoris(strainMG1363)GN=aspCPE=4SV=1
tr|A2RHP7|A2RHP7_LACLM	tr|A2RHP7|A2RHP7_LACLM	4	5	2	6	6	5	5	3	5	5	5	4	14	14	14	36.5	36.5	36.5	54.591	0	31.628	32891000	35	3151900	4133000	4937300	4044500	4085900	4112100	5416000	3646100	6353900	6700900	2083100	5257600	tr|A2RHP7|A2RHP7_LACLMUncharacterizedproteinOS=Lactococcuslactissubsp.cremoris(strainMG1363)GN=llmg_0177PE=4SV=1	tr|A2RHP7|A2RHP7_LACLMUncharacterizedproteinOS=Lactococcuslactissubsp.cremoris(strainMG1363)GN=llmg_0177PE=4SV=1
tr|A2RHP8|A2RHP8_LACLM	tr|A2RHP8|A2RHP8_LACLM	0	1	0	0	1	0	0	0	0	1	1	0	2	2	2	4.9	4.9	4.9	48.198	0.0067159	1.5751	88797	3	0	0	0	0	0	0	0	0	0	0	79379	0	tr|A2RHP8|A2RHP8_LACLMDinFproteinOS=Lactococcuslactissubsp.cremoris(strainMG1363)GN=dinFPE=4SV=1	tr|A2RHP8|A2RHP8_LACLMDinFproteinOS=Lactococcuslactissubsp.cremoris(strainMG1363)GN=dinFPE=4SV=1
tr|A2RHP9|A2RHP9_LACLM	tr|A2RHP9|A2RHP9_LACLM	7	6	7	4	4	6	4	4	4	4	4	2	8	8	7	90.8	90.8	90.8	7.1378	0	107.77	845200000	844	172370000	92169000	187190000	98270000	53690000	94485000	36838000	80669000	58506000	40429000	81699000	149400000	tr|A2RHP9|A2RHP9_LACLMCspEproteinOS=Lactococcuslactissubsp.cremoris(strainMG1363)GN=cspEPE=4SV=1	tr|A2RHP9|A2RHP9_LACLMCspEproteinOS=Lactococcuslactissubsp.cremoris(strainMG1363)GN=cspEPE=4SV=1
tr|A2RHQ0|A2RHQ0_LACLM	tr|A2RHQ0|A2RHQ0_LACLM	3	4	3	3	2	1	4	4	5	2	1	4	6	6	6	35.6	35.6	35.6	20.539	0	9.5383	19656000	54	2266200	2278700	1475600	5196900	3825000	0	2436000	3464700	4876900	3595900	0	5496100	tr|A2RHQ0|A2RHQ0_LACLM5-formyltetrahydrofolatecyclo-ligaseOS=Lactococcuslactissubsp.cremoris(strainMG1363)GN=llmg_0181PE=3SV=1	tr|A2RHQ0|A2RHQ0_LACLM5-formyltetrahydrofolatecyclo-ligaseOS=Lactococcuslactissubsp.cremoris(strainMG1363)GN=llmg_0181PE=3SV=1
tr|A2RHQ2|A2RHQ2_LACLM	tr|A2RHQ2|A2RHQ2_LACLM	6	4	4	3	3	4	6	5	5	1	5	5	7	7	7	51.7	51.7	51.7	16.636	0	45.541	83931000	183	10855000	8712900	8380500	8903400	7718600	11743000	9259900	7335200	6329900	0	4597000	7284800	tr|A2RHQ2|A2RHQ2_LACLMUncharacterizedproteinOS=Lactococcuslactissubsp.cremoris(strainMG1363)GN=llmg_0183PE=4SV=1	tr|A2RHQ2|A2RHQ2_LACLMUncharacterizedproteinOS=Lactococcuslactissubsp.cremoris(strainMG1363)GN=llmg_0183PE=4SV=1
tr|A2RHQ3|A2RHQ3_LACLM	tr|A2RHQ3|A2RHQ3_LACLM	1	0	1	1	1	1	1	1	2	1	1	1	3	3	3	33.3	33.3	33.3	14.445	0.0060484	1.6237	7591500	20	0	0	0	0	0	1432200	0	0	0	0	0	0	tr|A2RHQ3|A2RHQ3_LACLMUncharacterizedproteinOS=Lactococcuslactissubsp.cremoris(strainMG1363)GN=llmg_0184PE=4SV=1	tr|A2RHQ3|A2RHQ3_LACLMUncharacterizedproteinOS=Lactococcuslactissubsp.cremoris(strainMG1363)GN=llmg_0184PE=4SV=1
tr|A2RHQ4|A2RHQ4_LACLM	tr|A2RHQ4|A2RHQ4_LACLM	3	5	4	2	2	1	4	3	3	2	2	1	10	10	10	27.4	27.4	27.4	40.625	0	12.825	23915000	24	4825500	3692600	3352000	3219100	2877900	0	2270500	2732800	2803600	0	0	0	tr|A2RHQ4|A2RHQ4_LACLMUncharacterizedproteinOS=Lactococcuslactissubsp.cremoris(strainMG1363)GN=llmg_0185PE=4SV=1	tr|A2RHQ4|A2RHQ4_LACLMUncharacterizedproteinOS=Lactococcuslactissubsp.cremoris(strainMG1363)GN=llmg_0185PE=4SV=1
tr|A2RHQ7|A2RHQ7_LACLM	tr|A2RHQ7|A2RHQ7_LACLM	2	1	1	2	2	1	0	1	1	1	1	1	3	3	2	60.3	60.3	44.1	7.4816	0	113.49	12413000	43	3139400	827430	1306100	1334200	512710	1635900	0	0	1679400	836530	1050200	1266600	tr|A2RHQ7|A2RHQ7_LACLMUncharacterizedproteinOS=Lactococcuslactissubsp.cremoris(strainMG1363)GN=llmg_0188PE=4SV=1	tr|A2RHQ7|A2RHQ7_LACLMUncharacterizedproteinOS=Lactococcuslactissubsp.cremoris(strainMG1363)GN=llmg_0188PE=4SV=1
tr|A2RHQ9|A2RHQ9_LACLM	tr|A2RHQ9|A2RHQ9_LACLM	3	5	2	2	1	1	2	2	2	2	2	3	6	6	6	15.9	15.9	15.9	54.677	0	6.7787	42086000	13	1511800	1459100	2288800	0	0	0	1139300	1277100	1265500	1739900	1389900	1676800	tr|A2RHQ9|A2RHQ9_LACLMBglSproteinOS=Lactococcuslactissubsp.cremoris(strainMG1363)GN=bglSPE=3SV=1	tr|A2RHQ9|A2RHQ9_LACLMBglSproteinOS=Lactococcuslactissubsp.cremoris(strainMG1363)GN=bglSPE=3SV=1
tr|A2RHR0|A2RHR0_LACLM	tr|A2RHR0|A2RHR0_LACLM	11	12	9	10	9	9	10	10	9	9	9	7	13	13	13	79.3	79.3	79.3	16.791	0	141.87	637600000	644	90895000	56555000	43913000	121520000	141360000	128660000	112260000	79074000	86638000	81133000	76154000	70032000	tr|A2RHR0|A2RHR0_LACLMDeoxyuridine5'-triphosphatenucleotidohydrolaseOS=Lactococcuslactissubsp.cremoris(strainMG1363)GN=dutPE=4SV=1	tr|A2RHR0|A2RHR0_LACLMDeoxyuridine5'-triphosphatenucleotidohydrolaseOS=Lactococcuslactissubsp.cremoris(strainMG1363)GN=dutPE=4SV=1
tr|A2RHR1|A2RHR1_LACLM	tr|A2RHR1|A2RHR1_LACLM	4	5	3	3	5	4	3	4	3	2	3	3	7	7	7	14.6	14.6	14.6	50.545	0	3.7229	49445000	35	2296200	2388100	2499100	1449600	2675400	937470	1648000	2316000	2152800	3751600	2789400	3668900	tr|A2RHR1|A2RHR1_LACLMUncharacterizedproteinOS=Lactococcuslactissubsp.cremoris(strainMG1363)GN=llmg_0192PE=4SV=1	tr|A2RHR1|A2RHR1_LACLMUncharacterizedproteinOS=Lactococcuslactissubsp.cremoris(strainMG1363)GN=llmg_0192PE=4SV=1
tr|A2RHR2|A2RHR2_LACLM	tr|A2RHR2|A2RHR2_LACLM	5	6	4	3	3	2	3	3	3	5	5	4	9	9	9	31.8	31.8	31.8	30.13	0	27.54	103080000	96	21486000	9570600	8576100	563640	6258200	1264600	1572100	2734600	3093400	4115800	7302700	6604600	tr|A2RHR2|A2RHR2_LACLMUncharacterizedproteinOS=Lactococcuslactissubsp.cremoris(strainMG1363)GN=llmg_0193PE=4SV=1	tr|A2RHR2|A2RHR2_LACLMUncharacterizedproteinOS=Lactococcuslactissubsp.cremoris(strainMG1363)GN=llmg_0193PE=4SV=1
tr|A2RHR4|A2RHR4_LACLM	tr|A2RHR4|A2RHR4_LACLM	9	9	8	9	9	6	10	9	10	9	8	9	11	11	11	52.2	52.2	52.2	23.261	0	209.48	739150000	546	68707000	67657000	59757000	53037000	95670000	93085000	56908000	64690000	46181000	92075000	75689000	82617000	tr|A2RHR4|A2RHR4_LACLMUncharacterizedproteinOS=Lactococcuslactissubsp.cremoris(strainMG1363)GN=llmg_0195PE=4SV=1	tr|A2RHR4|A2RHR4_LACLMUncharacterizedproteinOS=Lactococcuslactissubsp.cremoris(strainMG1363)GN=llmg_0195PE=4SV=1
tr|A2RHR5|A2RHR5_LACLM	tr|A2RHR5|A2RHR5_LACLM	8	9	5	6	5	6	7	7	7	5	5	4	10	10	10	39	39	39	36.391	0	174.57	142080000	179	11890000	10618000	16375000	13952000	12936000	18390000	13074000	11189000	13461000	12715000	7895600	11446000	tr|A2RHR5|A2RHR5_LACLMUncharacterizedproteinOS=Lactococcuslactissubsp.cremoris(strainMG1363)GN=llmg_0196PE=3SV=1	tr|A2RHR5|A2RHR5_LACLMUncharacterizedproteinOS=Lactococcuslactissubsp.cremoris(strainMG1363)GN=llmg_0196PE=3SV=1
tr|A2RHR6|A2RHR6_LACLM	tr|A2RHR6|A2RHR6_LACLM	2	3	0	2	2	2	1	2	1	2	1	2	3	3	3	8.3	8.3	8.3	34.061	0	3.701	11351000	47	364120	435220	0	1069900	1448400	811240	0	964020	0	1282700	0	1484200	tr|A2RHR6|A2RHR6_LACLMMenAproteinOS=Lactococcuslactissubsp.cremoris(strainMG1363)GN=menAPE=4SV=1	tr|A2RHR6|A2RHR6_LACLMMenAproteinOS=Lactococcuslactissubsp.cremoris(strainMG1363)GN=menAPE=4SV=1
tr|A2RHR8|A2RHR8_LACLM	tr|A2RHR8|A2RHR8_LACLM	10	10	8	1	6	4	5	6	5	7	6	6	13	13	13	20	20	20	76.525	0	70.006	294880000	115	11141000	10593000	10551000	0	4538300	5177400	4299200	5954800	4625000	6677600	5445500	4828900	tr|A2RHR8|A2RHR8_LACLMFeoBproteinOS=Lactococcuslactissubsp.cremoris(strainMG1363)GN=feoBPE=4SV=1	tr|A2RHR8|A2RHR8_LACLMFeoBproteinOS=Lactococcuslactissubsp.cremoris(strainMG1363)GN=feoBPE=4SV=1
tr|A2RHR9|A2RHR9_LACLM	tr|A2RHR9|A2RHR9_LACLM	7	6	4	5	4	4	5	6	4	3	3	3	7	7	7	37.3	37.3	37.3	17.727	0	40.604	66390000	103	6765300	5747900	5066500	3367200	5970500	5746100	6214800	4710600	4452500	4870500	6691800	4713700	tr|A2RHR9|A2RHR9_LACLMFeoAproteinOS=Lactococcuslactissubsp.cremoris(strainMG1363)GN=feoAPE=4SV=1	tr|A2RHR9|A2RHR9_LACLMFeoAproteinOS=Lactococcuslactissubsp.cremoris(strainMG1363)GN=feoAPE=4SV=1
tr|A2RHS1|A2RHS1_LACLM	tr|A2RHS1|A2RHS1_LACLM	32	34	31	31	27	28	31	31	30	22	30	24	39	39	39	80.5	80.5	80.5	59.685	0	323.31	23753000000	2082	780050000	806270000	680180000	459010000	661290000	562920000	504810000	444930000	457230000	314780000	296780000	647150000	tr|A2RHS1|A2RHS1_LACLMUncharacterizedproteinOS=Lactococcuslactissubsp.cremoris(strainMG1363)GN=llmg_0202PE=4SV=1	tr|A2RHS1|A2RHS1_LACLMUncharacterizedproteinOS=Lactococcuslactissubsp.cremoris(strainMG1363)GN=llmg_0202PE=4SV=1
tr|A2RHS2|A2RHS2_LACLM	tr|A2RHS2|A2RHS2_LACLM	2	0	1	1	2	2	2	2	2	1	2	1	4	4	4	52.5	52.5	52.5	13.236	0	29.613	82652000	42	29270000	0	0	0	0	10776000	22485000	17888000	0	0	0	0	tr|A2RHS2|A2RHS2_LACLMUncharacterizedproteinOS=Lactococcuslactissubsp.cremoris(strainMG1363)GN=llmg_0203PE=4SV=1	tr|A2RHS2|A2RHS2_LACLMUncharacterizedproteinOS=Lactococcuslactissubsp.cremoris(strainMG1363)GN=llmg_0203PE=4SV=1
tr|A2RHS4|A2RHS4_LACLM	tr|A2RHS4|A2RHS4_LACLM	8	10	10	9	8	7	9	9	9	7	7	9	10	10	10	39.7	39.7	39.7	24.406	0	217.56	495790000	416	88378000	165960000	133030000	99978000	60251000	86990000	160000000	122890000	99581000	28061000	129020000	118380000	tr|A2RHS4|A2RHS4_LACLMUncharacterizedproteinOS=Lactococcuslactissubsp.cremoris(strainMG1363)GN=llmg_0205PE=4SV=1	tr|A2RHS4|A2RHS4_LACLMUncharacterizedproteinOS=Lactococcuslactissubsp.cremoris(strainMG1363)GN=llmg_0205PE=4SV=1
tr|A2RHS5|A2RHS5_LACLM	tr|A2RHS5|A2RHS5_LACLM	17	21	16	18	16	17	19	18	18	18	18	17	22	22	22	67.5	67.5	67.5	32.177	0	323.31	2584000000	1177	259870000	239630000	271010000	387420000	299260000	314520000	297620000	298310000	325730000	253980000	298140000	413260000	tr|A2RHS5|A2RHS5_LACLMGlucose-1-phosphatethymidylyltransferaseOS=Lactococcuslactissubsp.cremoris(strainMG1363)GN=rmlAPE=3SV=1	tr|A2RHS5|A2RHS5_LACLMGlucose-1-phosphatethymidylyltransferaseOS=Lactococcuslactissubsp.cremoris(strainMG1363)GN=rmlAPE=3SV=1
tr|A2RHS6|A2RHS6_LACLM	tr|A2RHS6|A2RHS6_LACLM	8	8	10	12	10	10	12	12	11	9	7	10	12	12	12	62.9	62.9	62.9	22.359	0	241.34	1332600000	883	76378000	44712000	113630000	124560000	112190000	94498000	199350000	148530000	154880000	89367000	83495000	109680000	tr|A2RHS6|A2RHS6_LACLMRmlCproteinOS=Lactococcuslactissubsp.cremoris(strainMG1363)GN=rmlCPE=4SV=1	tr|A2RHS6|A2RHS6_LACLMRmlCproteinOS=Lactococcuslactissubsp.cremoris(strainMG1363)GN=rmlCPE=4SV=1
tr|A2RHS7|A2RHS7_LACLM	tr|A2RHS7|A2RHS7_LACLM	2	0	2	0	0	2	0	0	0	0	1	0	3	3	3	45.2	45.2	45.2	9.8193	0	19.321	6647300	24	2441700	0	1346300	0	0	0	0	0	0	0	0	0	tr|A2RHS7|A2RHS7_LACLMUncharacterizedproteinOS=Lactococcuslactissubsp.cremoris(strainMG1363)GN=llmg_0208PE=4SV=1	tr|A2RHS7|A2RHS7_LACLMUncharacterizedproteinOS=Lactococcuslactissubsp.cremoris(strainMG1363)GN=llmg_0208PE=4SV=1
tr|A2RHS8|A2RHS8_LACLM	tr|A2RHS8|A2RHS8_LACLM	17	25	20	18	14	17	14	16	17	14	19	12	27	27	27	71.7	71.7	71.7	39.576	0	323.31	2238000000	1180	103050000	209780000	169640000	241160000	194360000	209100000	245530000	242140000	228620000	224290000	212090000	190310000	tr|A2RHS8|A2RHS8_LACLMdTDP-glucose4,6-dehydrataseOS=Lactococcuslactissubsp.cremoris(strainMG1363)GN=rmlBPE=3SV=1	tr|A2RHS8|A2RHS8_LACLMdTDP-glucose4,6-dehydrataseOS=Lactococcuslactissubsp.cremoris(strainMG1363)GN=rmlBPE=3SV=1
tr|A2RHS9|A2RHS9_LACLM	tr|A2RHS9|A2RHS9_LACLM	18	21	17	15	14	15	13	16	16	16	18	14	23	23	23	68.2	68.2	68.2	33.126	0	271.72	2048900000	652	221600000	282220000	195440000	243260000	150960000	110190000	174820000	234540000	249920000	175720000	264170000	284600000	tr|A2RHS9|A2RHS9_LACLMRmlDproteinOS=Lactococcuslactissubsp.cremoris(strainMG1363)GN=rmlDPE=4SV=1	tr|A2RHS9|A2RHS9_LACLMRmlDproteinOS=Lactococcuslactissubsp.cremoris(strainMG1363)GN=rmlDPE=4SV=1
tr|A2RHT0|A2RHT0_LACLM	tr|A2RHT0|A2RHT0_LACLM	7	10	5	7	4	5	3	9	7	5	7	3	13	13	13	35.1	35.1	35.1	46.055	0	98.504	265750000	84	9497800	9579000	8546500	8861400	8729200	6392100	7043200	15219000	19277000	13918000	17474000	12004000	tr|A2RHT0|A2RHT0_LACLMRgpAproteinOS=Lactococcuslactissubsp.cremoris(strainMG1363)GN=rgpAPE=4SV=1	tr|A2RHT0|A2RHT0_LACLMRgpAproteinOS=Lactococcuslactissubsp.cremoris(strainMG1363)GN=rgpAPE=4SV=1
tr|A2RHT1|A2RHT1_LACLM	tr|A2RHT1|A2RHT1_LACLM	7	8	6	6	5	6	5	6	5	5	5	5	8	8	8	37.4	37.4	37.4	36.467	0	108.55	145150000	112	13596000	14407000	15662000	11411000	11368000	12316000	8458000	8958100	9476000	7348600	8272900	12702000	tr|A2RHT1|A2RHT1_LACLMRgpBproteinOS=Lactococcuslactissubsp.cremoris(strainMG1363)GN=rgpBPE=4SV=1	tr|A2RHT1|A2RHT1_LACLMRgpBproteinOS=Lactococcuslactissubsp.cremoris(strainMG1363)GN=rgpBPE=4SV=1
tr|A2RHT3|A2RHT3_LACLM	tr|A2RHT3|A2RHT3_LACLM	21	24	19	17	16	19	18	18	18	17	21	16	30	30	30	74.1	74.1	74.1	44.778	0	323.31	1447700000	745	123150000	137090000	80435000	96895000	128530000	140870000	138400000	106920000	91536000	184370000	140640000	109460000	tr|A2RHT3|A2RHT3_LACLMRgpDproteinOS=Lactococcuslactissubsp.cremoris(strainMG1363)GN=rgpDPE=3SV=1	tr|A2RHT3|A2RHT3_LACLMRgpDproteinOS=Lactococcuslactissubsp.cremoris(strainMG1363)GN=rgpDPE=3SV=1
tr|A2RHT4|A2RHT4_LACLM	tr|A2RHT4|A2RHT4_LACLM	2	4	2	2	2	3	2	2	2	2	3	2	5	5	5	11.7	11.7	11.7	52.708	0	51.143	34637000	102	1447800	5608200	3828400	3930900	5416800	4212000	4782100	5945500	6805700	6490500	5922900	3729800	tr|A2RHT4|A2RHT4_LACLMUncharacterizedproteinOS=Lactococcuslactissubsp.cremoris(strainMG1363)GN=llmg_0215PE=4SV=1	tr|A2RHT4|A2RHT4_LACLMUncharacterizedproteinOS=Lactococcuslactissubsp.cremoris(strainMG1363)GN=llmg_0215PE=4SV=1
tr|A2RHT5|A2RHT5_LACLM	tr|A2RHT5|A2RHT5_LACLM	10	11	7	7	5	6	8	9	7	9	9	7	13	13	13	43.4	43.4	43.4	36.76	0	156.94	142970000	166	19620000	16525000	24990000	12510000	9337200	7449000	6970700	11586000	13576000	19508000	9408600	12498000	tr|A2RHT5|A2RHT5_LACLMRgpEproteinOS=Lactococcuslactissubsp.cremoris(strainMG1363)GN=rgpEPE=4SV=1	tr|A2RHT5|A2RHT5_LACLMRgpEproteinOS=Lactococcuslactissubsp.cremoris(strainMG1363)GN=rgpEPE=4SV=1
tr|A2RHT6|A2RHT6_LACLM	tr|A2RHT6|A2RHT6_LACLM	25	27	21	16	17	16	15	18	19	13	20	14	31	31	31	59.2	59.2	59.2	69.46	0	323.31	7958700000	429	188320000	175870000	154770000	116040000	70832000	96026000	141730000	130170000	126150000	85145000	170060000	120970000	tr|A2RHT6|A2RHT6_LACLMRgpFproteinOS=Lactococcuslactissubsp.cremoris(strainMG1363)GN=rgpFPE=4SV=1	tr|A2RHT6|A2RHT6_LACLMRgpFproteinOS=Lactococcuslactissubsp.cremoris(strainMG1363)GN=rgpFPE=4SV=1
tr|A2RHT7|A2RHT7_LACLM	tr|A2RHT7|A2RHT7_LACLM	7	6	9	8	6	6	8	7	8	6	6	8	11	11	11	38.8	38.8	38.8	27.551	0	101.91	479760000	172	49770000	61277000	50373000	41653000	61254000	34457000	54135000	57592000	55982000	49259000	66726000	77181000	tr|A2RHT7|A2RHT7_LACLMUncharacterizedproteinOS=Lactococcuslactissubsp.cremoris(strainMG1363)GN=llmg_0218PE=4SV=1	tr|A2RHT7|A2RHT7_LACLMUncharacterizedproteinOS=Lactococcuslactissubsp.cremoris(strainMG1363)GN=llmg_0218PE=4SV=1
tr|A2RHT9|A2RHT9_LACLM	tr|A2RHT9|A2RHT9_LACLM	4	5	6	4	4	3	6	6	5	6	4	5	9	9	9	44.3	44.3	44.3	31.107	0	153.73	133010000	182	8536700	22060000	8019300	15187000	16370000	16098000	18295000	18562000	13933000	18282000	11935000	20201000	tr|A2RHT9|A2RHT9_LACLMUncharacterizedproteinOS=Lactococcuslactissubsp.cremoris(strainMG1363)GN=llmg_0220PE=4SV=1	tr|A2RHT9|A2RHT9_LACLMUncharacterizedproteinOS=Lactococcuslactissubsp.cremoris(strainMG1363)GN=llmg_0220PE=4SV=1
tr|A2RHU0|A2RHU0_LACLM	tr|A2RHU0|A2RHU0_LACLM	11	11	8	7	8	8	10	11	11	9	8	9	14	14	14	42.4	42.4	42.4	37.915	0	115.55	242590000	233	38735000	22170000	29572000	7661000	39052000	15500000	11432000	17451000	18788000	34409000	38002000	36996000	tr|A2RHU0|A2RHU0_LACLMUncharacterizedproteinOS=Lactococcuslactissubsp.cremoris(strainMG1363)GN=llmg_0221PE=4SV=1	tr|A2RHU0|A2RHU0_LACLMUncharacterizedproteinOS=Lactococcuslactissubsp.cremoris(strainMG1363)GN=llmg_0221PE=4SV=1
tr|A2RHU1|A2RHU1_LACLM	tr|A2RHU1|A2RHU1_LACLM	9	13	8	10	10	9	9	10	9	9	10	9	15	15	15	42.8	42.8	42.8	38.78	0	124.7	167120000	239	7798900	11796000	14602000	11832000	12707000	23026000	14804000	14485000	15917000	21342000	16717000	19335000	tr|A2RHU1|A2RHU1_LACLMWefCproteinOS=Lactococcuslactissubsp.cremoris(strainMG1363)GN=wefCPE=4SV=1	tr|A2RHU1|A2RHU1_LACLMWefCproteinOS=Lactococcuslactissubsp.cremoris(strainMG1363)GN=wefCPE=4SV=1
tr|A2RHU2|A2RHU2_LACLM	tr|A2RHU2|A2RHU2_LACLM	7	10	9	12	9	9	8	9	8	8	8	9	16	16	16	45.3	45.3	45.3	39.005	0	100.15	229710000	188	23896000	23116000	31215000	31501000	21903000	32693000	31247000	35439000	29471000	41895000	31080000	34500000	tr|A2RHU2|A2RHU2_LACLMUncharacterizedproteinOS=Lactococcuslactissubsp.cremoris(strainMG1363)GN=llmg_0223PE=4SV=1	tr|A2RHU2|A2RHU2_LACLMUncharacterizedproteinOS=Lactococcuslactissubsp.cremoris(strainMG1363)GN=llmg_0223PE=4SV=1
tr|A2RHU3|A2RHU3_LACLM	tr|A2RHU3|A2RHU3_LACLM	19	19	15	15	14	15	13	15	14	11	14	10	26	26	26	67.6	67.6	67.6	44.064	0	323.31	2153100000	542	145070000	218550000	225640000	213290000	238630000	128050000	161730000	198080000	252300000	208010000	289340000	150360000	tr|A2RHU3|A2RHU3_LACLMGlf1proteinOS=Lactococcuslactissubsp.cremoris(strainMG1363)GN=glf1PE=4SV=1	tr|A2RHU3|A2RHU3_LACLMGlf1proteinOS=Lactococcuslactissubsp.cremoris(strainMG1363)GN=glf1PE=4SV=1
tr|A2RHU4|A2RHU4_LACLM	tr|A2RHU4|A2RHU4_LACLM	0	0	0	0	2	1	1	1	1	3	3	2	4	4	4	7	7	7	53.146	0	4.7903	7113600	26	0	0	0	0	0	0	0	0	0	1275000	1748200	1150900	tr|A2RHU4|A2RHU4_LACLMRfbXproteinOS=Lactococcuslactissubsp.cremoris(strainMG1363)GN=rfbXPE=4SV=1	tr|A2RHU4|A2RHU4_LACLMRfbXproteinOS=Lactococcuslactissubsp.cremoris(strainMG1363)GN=rfbXPE=4SV=1
tr|A2RHU5|A2RHU5_LACLM	tr|A2RHU5|A2RHU5_LACLM	19	18	19	16	12	14	16	16	16	11	16	13	22	22	22	48.7	48.7	48.7	64.872	0	323.31	1193800000	399	35561000	30753000	54474000	40722000	47250000	42648000	46189000	48560000	46737000	39229000	48376000	73967000	tr|A2RHU5|A2RHU5_LACLMUncharacterizedproteinOS=Lactococcuslactissubsp.cremoris(strainMG1363)GN=llmg_0226PE=4SV=1	tr|A2RHU5|A2RHU5_LACLMUncharacterizedproteinOS=Lactococcuslactissubsp.cremoris(strainMG1363)GN=llmg_0226PE=4SV=1
tr|A2RHU6|A2RHU6_LACLM	tr|A2RHU6|A2RHU6_LACLM	1	1	0	0	1	1	1	1	1	1	2	1	2	2	2	2.6	2.6	2.6	40.391	0	2.4716	22919000	19	0	0	0	0	0	0	0	0	0	0	0	4887500	tr|A2RHU6|A2RHU6_LACLMUncharacterizedproteinOS=Lactococcuslactissubsp.cremoris(strainMG1363)GN=llmg_0227PE=4SV=1	tr|A2RHU6|A2RHU6_LACLMUncharacterizedproteinOS=Lactococcuslactissubsp.cremoris(strainMG1363)GN=llmg_0227PE=4SV=1
tr|A2RHU8|A2RHU8_LACLM	tr|A2RHU8|A2RHU8_LACLM	15	14	12	7	6	7	8	10	11	4	7	3	17	17	16	59.3	59.3	56.9	48.224	0	323.31	584110000	222	30444000	28335000	29310000	6721400	7919300	3814700	10078000	11166000	11418000	9938400	5238500	10856000	tr|A2RHU8|A2RHU8_LACLMUncharacterizedproteinOS=Lactococcuslactissubsp.cremoris(strainMG1363)GN=llmg_0229PE=4SV=1;tr|A2RKD2|A2RKD2_LACLMUncharacterizedproteinOS=Lactococcuslactissubsp.cremoris(strainMG1363)GN=llmg_1148PE=4SV=1	tr|A2RHU8|A2RHU8_LACLMUncharacterizedproteinOS=Lactococcuslactissubsp.cremoris(strainMG1363)GN=llmg_0229PE=4SV=1
tr|A2RHU9|A2RHU9_LACLM	tr|A2RHU9|A2RHU9_LACLM	41	41	38	30	33	33	31	32	29	25	28	22	42	42	42	89.7	89.7	89.7	52.84	0	323.31	19596000000	2214	580380000	607880000	764410000	459270000	627260000	708570000	616400000	405550000	569760000	689000000	506390000	416310000	tr|A2RHU9|A2RHU9_LACLMInosine-5'-monophosphatedehydrogenaseOS=Lactococcuslactissubsp.cremoris(strainMG1363)GN=guaBPE=3SV=1	tr|A2RHU9|A2RHU9_LACLMInosine-5'-monophosphatedehydrogenaseOS=Lactococcuslactissubsp.cremoris(strainMG1363)GN=guaBPE=3SV=1
tr|A2RHV0|A2RHV0_LACLM	tr|A2RHV0|A2RHV0_LACLM	17	21	9	13	14	13	13	15	15	12	15	9	22	22	22	62.5	62.5	62.5	42.343	0	290.75	898660000	407	57259000	46348000	47834000	43724000	62791000	65716000	43704000	37332000	49514000	71475000	54867000	64584000	tr|A2RHV0|A2RHV0_LACLMUncharacterizedproteinOS=Lactococcuslactissubsp.cremoris(strainMG1363)GN=llmg_0231PE=4SV=1	tr|A2RHV0|A2RHV0_LACLMUncharacterizedproteinOS=Lactococcuslactissubsp.cremoris(strainMG1363)GN=llmg_0231PE=4SV=1
tr|A2RHV2|A2RHV2_LACLM	tr|A2RHV2|A2RHV2_LACLM	7	9	4	6	9	6	7	8	9	5	6	3	13	13	13	34.3	34.3	34.3	46.755	0	71.749	84811000	78	3505300	5712900	7432200	8544500	4062800	11496000	5434300	5784700	4852200	6312800	6066900	3006600	tr|A2RHV2|A2RHV2_LACLMGTPaseHflXOS=Lactococcuslactissubsp.cremoris(strainMG1363)GN=hflXPE=3SV=1	tr|A2RHV2|A2RHV2_LACLMGTPaseHflXOS=Lactococcuslactissubsp.cremoris(strainMG1363)GN=hflXPE=3SV=1
tr|A2RHV4|A2RHV4_LACLM	tr|A2RHV4|A2RHV4_LACLM	2	4	2	3	4	2	2	2	2	3	4	2	5	5	5	54.8	54.8	54.8	11.589	0	110.89	440920000	557	13060000	41480000	18107000	88248000	123900000	387100000	210520000	290310000	242860000	87249000	213100000	117450000	tr|A2RHV4|A2RHV4_LACLMUncharacterizedproteinOS=Lactococcuslactissubsp.cremoris(strainMG1363)GN=llmg_0235PE=4SV=1	tr|A2RHV4|A2RHV4_LACLMUncharacterizedproteinOS=Lactococcuslactissubsp.cremoris(strainMG1363)GN=llmg_0235PE=4SV=1
tr|A2RHV5|A2RHV5_LACLM	tr|A2RHV5|A2RHV5_LACLM	3	3	3	3	3	2	4	4	4	2	2	2	4	4	4	23.6	23.6	23.6	22.631	0	6.4008	69697000	44	6061300	5187700	4486900	6559800	4955700	6358900	3890200	5274400	4946800	4694000	8671300	5938600	tr|A2RHV5|A2RHV5_LACLMProbablenicotinate-nucleotideadenylyltransferaseOS=Lactococcuslactissubsp.cremoris(strainMG1363)GN=nadDPE=3SV=1	tr|A2RHV5|A2RHV5_LACLMProbablenicotinate-nucleotideadenylyltransferaseOS=Lactococcuslactissubsp.cremoris(strainMG1363)GN=nadDPE=3SV=1
tr|A2RHV6|A2RHV6_LACLM	tr|A2RHV6|A2RHV6_LACLM	4	3	4	6	7	5	7	6	8	6	6	7	10	10	10	62.8	62.8	62.8	22.326	0	35.129	1664200000	117	32852000	42171000	99152000	63511000	48224000	43878000	41088000	46202000	37103000	46288000	34374000	43675000	tr|A2RHV6|A2RHV6_LACLMUncharacterizedproteinOS=Lactococcuslactissubsp.cremoris(strainMG1363)GN=llmg_0237PE=4SV=1	tr|A2RHV6|A2RHV6_LACLMUncharacterizedproteinOS=Lactococcuslactissubsp.cremoris(strainMG1363)GN=llmg_0237PE=4SV=1
tr|A2RHV7|A2RHV7_LACLM	tr|A2RHV7|A2RHV7_LACLM	1	1	1	2	2	2	1	1	2	2	2	3	3	3	3	21	21	21	16.185	0	2.7656	11921000	34	0	0	0	2367800	2676300	2138800	0	0	0	2494200	1846800	2046700	tr|A2RHV7|A2RHV7_LACLMUncharacterizedproteinOS=Lactococcuslactissubsp.cremoris(strainMG1363)GN=llmg_0238PE=4SV=1	tr|A2RHV7|A2RHV7_LACLMUncharacterizedproteinOS=Lactococcuslactissubsp.cremoris(strainMG1363)GN=llmg_0238PE=4SV=1
tr|A2RHV8|A2RHV8_LACLM	tr|A2RHV8|A2RHV8_LACLM	7	5	6	7	4	6	5	4	6	6	7	5	9	9	9	95.8	95.8	95.8	12.847	0	304.21	3322400000	337	903920000	762050000	898910000	156270000	299860000	170760000	214940000	330620000	239290000	217370000	255800000	271270000	tr|A2RHV8|A2RHV8_LACLMRibosomalsilencingfactorRsfSOS=Lactococcuslactissubsp.cremoris(strainMG1363)GN=rsfSPE=3SV=1	tr|A2RHV8|A2RHV8_LACLMRibosomalsilencingfactorRsfSOS=Lactococcuslactissubsp.cremoris(strainMG1363)GN=rsfSPE=3SV=1
tr|A2RHV9|A2RHV9_LACLM	tr|A2RHV9|A2RHV9_LACLM	1	1	3	4	2	3	3	3	3	3	2	3	5	5	5	31.6	31.6	31.6	27.968	0	10.382	29453000	40	0	0	3687500	3783000	4673400	3379000	6355400	5710400	5268000	4106800	6053300	8157500	tr|A2RHV9|A2RHV9_LACLMUncharacterizedproteinOS=Lactococcuslactissubsp.cremoris(strainMG1363)GN=llmg_0240PE=4SV=1	tr|A2RHV9|A2RHV9_LACLMUncharacterizedproteinOS=Lactococcuslactissubsp.cremoris(strainMG1363)GN=llmg_0240PE=4SV=1
tr|A2RHW4|A2RHW4_LACLM	tr|A2RHW4|A2RHW4_LACLM	2	2	1	0	1	0	1	1	1	1	1	2	3	3	3	12.7	12.7	12.7	31.998	0	9.1646	4815400	8	921800	1094500	0	0	0	0	0	0	0	0	0	0	tr|A2RHW4|A2RHW4_LACLMUncharacterizedproteinOS=Lactococcuslactissubsp.cremoris(strainMG1363)GN=llmg_0246PE=4SV=1	tr|A2RHW4|A2RHW4_LACLMUncharacterizedproteinOS=Lactococcuslactissubsp.cremoris(strainMG1363)GN=llmg_0246PE=4SV=1
tr|A2RHW6|A2RHW6_LACLM	tr|A2RHW6|A2RHW6_LACLM	1	1	0	0	0	0	2	2	3	0	0	2	3	3	3	21.5	21.5	21.5	21.226	0	6.2434	11122000	9	0	0	0	0	0	0	3332100	5597600	3662600	0	0	5378400	tr|A2RHW6|A2RHW6_LACLMUncharacterizedproteinOS=Lactococcuslactissubsp.cremoris(strainMG1363)GN=llmg_0248PE=4SV=1	tr|A2RHW6|A2RHW6_LACLMUncharacterizedproteinOS=Lactococcuslactissubsp.cremoris(strainMG1363)GN=llmg_0248PE=4SV=1
tr|A2RHX0|A2RHX0_LACLM	tr|A2RHX0|A2RHX0_LACLM	0	1	1	3	2	4	2	3	2	2	1	2	5	5	5	24.1	24.1	24.1	30.68	0	48.753	2198900	16	0	0	0	750730	0	318530	545830	403820	467080	513330	0	458850	tr|A2RHX0|A2RHX0_LACLMUncharacterizedproteinOS=Lactococcuslactissubsp.cremoris(strainMG1363)GN=llmg_0252PE=4SV=1	tr|A2RHX0|A2RHX0_LACLMUncharacterizedproteinOS=Lactococcuslactissubsp.cremoris(strainMG1363)GN=llmg_0252PE=4SV=1
tr|A2RHX2|A2RHX2_LACLM	tr|A2RHX2|A2RHX2_LACLM	0	0	0	0	0	0	1	1	2	0	0	1	2	2	2	12.9	12.9	12.9	26.055	0	3.0696	564460	3	0	0	0	0	0	0	0	0	730490	0	0	0	tr|A2RHX2|A2RHX2_LACLMHadLproteinOS=Lactococcuslactissubsp.cremoris(strainMG1363)GN=hadLPE=4SV=1	tr|A2RHX2|A2RHX2_LACLMHadLproteinOS=Lactococcuslactissubsp.cremoris(strainMG1363)GN=hadLPE=4SV=1
tr|A2RHX3|A2RHX3_LACLM	tr|A2RHX3|A2RHX3_LACLM	4	6	1	0	1	1	1	1	1	1	1	1	6	6	6	16.2	16.2	16.2	36.168	0	7.5648	11494000	18	2024400	2007900	0	0	0	0	0	0	0	0	0	0	tr|A2RHX3|A2RHX3_LACLMDhaKproteinOS=Lactococcuslactissubsp.cremoris(strainMG1363)GN=dhaKPE=4SV=1	tr|A2RHX3|A2RHX3_LACLMDhaKproteinOS=Lactococcuslactissubsp.cremoris(strainMG1363)GN=dhaKPE=4SV=1
tr|A2RHX6|A2RHX6_LACLM	tr|A2RHX6|A2RHX6_LACLM	6	9	6	6	5	6	4	5	7	4	5	4	17	16	16	44.6	43	43	51.788	0	71.888	333410000	71	12649000	11273000	11466000	25644000	19596000	10139000	17168000	21731000	18058000	18936000	14850000	17568000	tr|A2RHX6|A2RHX6_LACLMPepDAproteinOS=Lactococcuslactissubsp.cremoris(strainMG1363)GN=pepDAPE=4SV=1	tr|A2RHX6|A2RHX6_LACLMPepDAproteinOS=Lactococcuslactissubsp.cremoris(strainMG1363)GN=pepDAPE=4SV=1
tr|A2RHX8|A2RHX8_LACLM	tr|A2RHX8|A2RHX8_LACLM	8	9	7	9	6	8	8	9	7	7	7	7	11	11	11	38	38	38	43.446	0	120.14	113200000	129	8127700	9165100	7253600	8589200	13279000	8853200	8454500	10063000	11172000	10949000	11509000	9456200	tr|A2RHX8|A2RHX8_LACLMUncharacterizedproteinOS=Lactococcuslactissubsp.cremoris(strainMG1363)GN=llmg_0263PE=4SV=1	tr|A2RHX8|A2RHX8_LACLMUncharacterizedproteinOS=Lactococcuslactissubsp.cremoris(strainMG1363)GN=llmg_0263PE=4SV=1
tr|A2RHY0|A2RHY0_LACLM	tr|A2RHY0|A2RHY0_LACLM	8	8	6	11	8	9	7	7	10	6	8	7	17	17	17	47.2	47.2	47.2	45.621	0	89.683	112520000	165	13529000	8931800	13535000	9401500	13015000	4329000	4253800	8456000	10881000	14919000	12599000	14228000	tr|A2RHY0|A2RHY0_LACLMUncharacterizedproteinOS=Lactococcuslactissubsp.cremoris(strainMG1363)GN=llmg_0265PE=4SV=1	tr|A2RHY0|A2RHY0_LACLMUncharacterizedproteinOS=Lactococcuslactissubsp.cremoris(strainMG1363)GN=llmg_0265PE=4SV=1
tr|A2RHY1|A2RHY1_LACLM	tr|A2RHY1|A2RHY1_LACLM	9	9	5	6	7	7	8	8	7	7	6	7	12	12	12	50	50	50	29.994	0	131.77	98333000	129	7850600	8258100	5877000	8074500	11559000	24495000	13695000	9751100	12911000	7282900	8781800	6596700	tr|A2RHY1|A2RHY1_LACLMADP-dependent(S)-NAD(P)H-hydratedehydrataseOS=Lactococcuslactissubsp.cremoris(strainMG1363)GN=nnrDPE=3SV=1	tr|A2RHY1|A2RHY1_LACLMADP-dependent(S)-NAD(P)H-hydratedehydrataseOS=Lactococcuslactissubsp.cremoris(strainMG1363)GN=nnrDPE=3SV=1
tr|A2RHY2|A2RHY2_LACLM	tr|A2RHY2|A2RHY2_LACLM	2	3	2	3	2	2	2	2	2	2	2	1	4	4	4	44.5	44.5	44.5	14.996	0	45.437	58295000	36	7865700	7793200	5656700	2520700	4354700	4038500	4384800	3402200	3832400	5868500	3098400	0	tr|A2RHY2|A2RHY2_LACLMUncharacterizedproteinOS=Lactococcuslactissubsp.cremoris(strainMG1363)GN=llmg_0267PE=4SV=1	tr|A2RHY2|A2RHY2_LACLMUncharacterizedproteinOS=Lactococcuslactissubsp.cremoris(strainMG1363)GN=llmg_0267PE=4SV=1
tr|A2RHY3|A2RHY3_LACLM	tr|A2RHY3|A2RHY3_LACLM	1	1	1	3	2	2	2	2	2	2	1	2	3	3	3	4.7	4.7	4.7	66.405	0	4.0844	378700000	36	0	0	0	4990300	11243000	0	7978000	9445900	3671900	8541500	0	4052700	tr|A2RHY3|A2RHY3_LACLMUncharacterizedproteinOS=Lactococcuslactissubsp.cremoris(strainMG1363)GN=llmg_0268PE=3SV=1	tr|A2RHY3|A2RHY3_LACLMUncharacterizedproteinOS=Lactococcuslactissubsp.cremoris(strainMG1363)GN=llmg_0268PE=3SV=1
tr|A2RHY4|A2RHY4_LACLM	tr|A2RHY4|A2RHY4_LACLM	1	1	1	0	1	1	1	1	1	1	0	1	2	2	2	3.3	3.3	3.3	71.503	0	8.7183	6702400	7	0	0	0	0	0	0	167770	0	0	0	0	0	tr|A2RHY4|A2RHY4_LACLMUncharacterizedproteinOS=Lactococcuslactissubsp.cremoris(strainMG1363)GN=llmg_0269PE=3SV=1	tr|A2RHY4|A2RHY4_LACLMUncharacterizedproteinOS=Lactococcuslactissubsp.cremoris(strainMG1363)GN=llmg_0269PE=3SV=1
tr|A2RHY5|A2RHY5_LACLM	tr|A2RHY5|A2RHY5_LACLM	3	3	2	1	2	2	4	4	4	3	2	3	5	5	5	21.7	21.7	21.7	24.395	0	29.762	58435000	23	3735000	4190800	3498900	0	2402600	6031800	1929000	3020900	3783200	4775800	4377800	5013900	tr|A2RHY5|A2RHY5_LACLMUncharacterizedproteinOS=Lactococcuslactissubsp.cremoris(strainMG1363)GN=llmg_0270PE=4SV=1	tr|A2RHY5|A2RHY5_LACLMUncharacterizedproteinOS=Lactococcuslactissubsp.cremoris(strainMG1363)GN=llmg_0270PE=4SV=1
tr|A2RHY6|A2RHY6_LACLM	tr|A2RHY6|A2RHY6_LACLM	19	19	15	12	13	12	10	13	13	11	10	11	19	19	19	46.3	46.3	46.3	38.137	0	323.31	570760000	452	47220000	41487000	43016000	37370000	40586000	53546000	56891000	30095000	35859000	40971000	23807000	37921000	tr|A2RHY6|A2RHY6_LACLMUncharacterizedproteinOS=Lactococcuslactissubsp.cremoris(strainMG1363)GN=llmg_0271PE=4SV=1	tr|A2RHY6|A2RHY6_LACLMUncharacterizedproteinOS=Lactococcuslactissubsp.cremoris(strainMG1363)GN=llmg_0271PE=4SV=1
tr|A2RHZ1|A2RHZ1_LACLM	tr|A2RHZ1|A2RHZ1_LACLM	19	20	14	18	16	15	16	16	19	17	12	14	23	23	23	64.8	64.8	64.8	31.09	0	320.64	758110000	618	68860000	138470000	77554000	110300000	73175000	44557000	44994000	65736000	82668000	46746000	70411000	56008000	tr|A2RHZ1|A2RHZ1_LACLMUncharacterizedproteinOS=Lactococcuslactissubsp.cremoris(strainMG1363)GN=llmg_0276PE=4SV=1	tr|A2RHZ1|A2RHZ1_LACLMUncharacterizedproteinOS=Lactococcuslactissubsp.cremoris(strainMG1363)GN=llmg_0276PE=4SV=1
tr|A2RHZ2|A2RHZ2_LACLM	tr|A2RHZ2|A2RHZ2_LACLM	5	6	5	6	5	6	6	6	5	4	5	4	7	7	7	52.4	52.4	52.4	18.875	0	162.51	390810000	369	63755000	54805000	36773000	64222000	53162000	82796000	72358000	66720000	72552000	50305000	54913000	58200000	tr|A2RHZ2|A2RHZ2_LACLMUncharacterizedproteinOS=Lactococcuslactissubsp.cremoris(strainMG1363)GN=llmg_0277PE=4SV=1	tr|A2RHZ2|A2RHZ2_LACLMUncharacterizedproteinOS=Lactococcuslactissubsp.cremoris(strainMG1363)GN=llmg_0277PE=4SV=1
tr|A2RHZ6|A2RHZ6_LACLM	tr|A2RHZ6|A2RHZ6_LACLM	45	44	38	34	30	29	34	31	35	28	34	27	49	49	49	61.6	61.6	61.6	84.146	0	323.31	14457000000	1751	342420000	324390000	343690000	250260000	221700000	173100000	266890000	246340000	211950000	337110000	325120000	276170000	tr|A2RHZ6|A2RHZ6_LACLMUncharacterizedproteinOS=Lactococcuslactissubsp.cremoris(strainMG1363)GN=llmg_0281PE=4SV=1	tr|A2RHZ6|A2RHZ6_LACLMUncharacterizedproteinOS=Lactococcuslactissubsp.cremoris(strainMG1363)GN=llmg_0281PE=4SV=1
tr|A2RHZ7|A2RHZ7_LACLM	tr|A2RHZ7|A2RHZ7_LACLM	3	3	3	3	3	3	4	4	4	3	2	4	4	4	4	26.1	26.1	26.1	23.304	0	22.849	150860000	128	15984000	18469000	11015000	6538600	9121700	12989000	10179000	7722400	7542700	13504000	0	6641200	tr|A2RHZ7|A2RHZ7_LACLMAnaerobicribonucleoside-triphosphatereductase-activatingproteinOS=Lactococcuslactissubsp.cremoris(strainMG1363)GN=nrdGPE=3SV=1	tr|A2RHZ7|A2RHZ7_LACLMAnaerobicribonucleoside-triphosphatereductase-activatingproteinOS=Lactococcuslactissubsp.cremoris(strainMG1363)GN=nrdGPE=3SV=1
tr|A2RHZ8|A2RHZ8_LACLM	tr|A2RHZ8|A2RHZ8_LACLM	5	3	4	1	1	2	3	3	3	1	3	2	8	8	8	48.5	48.5	48.5	19.447	0	151.94	13609000	53	3737200	3268800	2482500	0	0	0	1935400	2365600	2974700	0	2176500	1953600	tr|A2RHZ8|A2RHZ8_LACLMUncharacterizedproteinOS=Lactococcuslactissubsp.cremoris(strainMG1363)GN=llmg_0283PE=4SV=1	tr|A2RHZ8|A2RHZ8_LACLMUncharacterizedproteinOS=Lactococcuslactissubsp.cremoris(strainMG1363)GN=llmg_0283PE=4SV=1
tr|A2RHZ9|A2RHZ9_LACLM	tr|A2RHZ9|A2RHZ9_LACLM	11	12	7	11	6	8	7	11	9	8	11	11	23	23	23	40.1	40.1	40.1	50.661	0	250.95	354430000	207	9548800	12052000	12669000	15804000	8824500	18655000	8158400	17408000	10917000	8077700	9950600	15559000	tr|A2RHZ9|A2RHZ9_LACLMUncharacterizedproteinOS=Lactococcuslactissubsp.cremoris(strainMG1363)GN=llmg_0284PE=4SV=1	tr|A2RHZ9|A2RHZ9_LACLMUncharacterizedproteinOS=Lactococcuslactissubsp.cremoris(strainMG1363)GN=llmg_0284PE=4SV=1
tr|A2RI04|A2RI04_LACLM	tr|A2RI04|A2RI04_LACLM	3	5	4	3	3	3	4	5	5	0	2	3	7	7	7	32	32	32	23.228	0	22.585	73525000	46	4406000	3553100	4085700	3801800	2674500	9262100	3185700	3466100	3714400	0	3612900	990570	tr|A2RI04|A2RI04_LACLMUncharacterizedproteinOS=Lactococcuslactissubsp.cremoris(strainMG1363)GN=llmg_0290PE=4SV=1	tr|A2RI04|A2RI04_LACLMUncharacterizedproteinOS=Lactococcuslactissubsp.cremoris(strainMG1363)GN=llmg_0290PE=4SV=1
tr|A2RI07|A2RI07_LACLM	tr|A2RI07|A2RI07_LACLM	7	6	3	4	2	2	2	3	4	2	3	3	9	9	9	31.4	31.4	31.4	41.772	0	67.313	55678000	47	2656600	2398600	2827500	1623500	1364700	1293500	1162200	1631000	1881700	1872200	700700	2280900	tr|A2RI07|A2RI07_LACLMXynDproteinOS=Lactococcuslactissubsp.cremoris(strainMG1363)GN=xynDPE=4SV=1	tr|A2RI07|A2RI07_LACLMXynDproteinOS=Lactococcuslactissubsp.cremoris(strainMG1363)GN=xynDPE=4SV=1
tr|A2RI11|A2RI11_LACLM	tr|A2RI11|A2RI11_LACLM	50	50	39	37	41	37	42	39	40	35	40	31	57	57	56	74.3	74.3	73.6	78.802	0	323.31	8868000000	1293	212150000	221570000	270390000	215560000	220380000	217750000	202570000	187170000	192520000	250850000	221590000	235770000	tr|A2RI11|A2RI11_LACLMTexproteinOS=Lactococcuslactissubsp.cremoris(strainMG1363)GN=texPE=4SV=1	tr|A2RI11|A2RI11_LACLMTexproteinOS=Lactococcuslactissubsp.cremoris(strainMG1363)GN=texPE=4SV=1
tr|A2RI12|A2RI12_LACLM	tr|A2RI12|A2RI12_LACLM	1	1	1	0	1	1	2	2	2	0	0	1	3	3	3	11.6	11.6	11.6	17.668	0.0013699	2.1604	4397800	12	0	0	0	0	0	0	290320	641510	379670	0	0	0	tr|A2RI12|A2RI12_LACLMUncharacterizedproteinOS=Lactococcuslactissubsp.cremoris(strainMG1363)GN=llmg_0298PE=4SV=1	tr|A2RI12|A2RI12_LACLMUncharacterizedproteinOS=Lactococcuslactissubsp.cremoris(strainMG1363)GN=llmg_0298PE=4SV=1
tr|A2RI13|A2RI13_LACLM	tr|A2RI13|A2RI13_LACLM	10	11	8	12	9	10	8	10	10	8	9	8	14	14	14	43.9	43.9	43.9	38.846	0	166	291690000	220	39443000	30419000	49840000	24036000	26218000	27500000	44120000	22373000	23770000	41282000	20525000	42578000	tr|A2RI13|A2RI13_LACLMAdenosinedeaminaseOS=Lactococcuslactissubsp.cremoris(strainMG1363)GN=addPE=3SV=1	tr|A2RI13|A2RI13_LACLMAdenosinedeaminaseOS=Lactococcuslactissubsp.cremoris(strainMG1363)GN=addPE=3SV=1
tr|A2RI16|A2RI16_LACLM	tr|A2RI16|A2RI16_LACLM	24	26	22	22	23	22	23	22	20	15	20	17	32	32	31	70.6	70.6	70.1	61.627	0	323.31	10208000000	1125	234140000	219280000	205910000	125610000	200950000	140980000	148630000	128330000	133770000	121210000	132520000	150410000	tr|A2RI16|A2RI16_LACLMRibonucleaseJOS=Lactococcuslactissubsp.cremoris(strainMG1363)GN=rnjPE=3SV=1	tr|A2RI16|A2RI16_LACLMRibonucleaseJOS=Lactococcuslactissubsp.cremoris(strainMG1363)GN=rnjPE=3SV=1
tr|A2RI19|A2RI19_LACLM	tr|A2RI19|A2RI19_LACLM	13	13	13	12	12	12	12	12	11	12	11	12	15	15	15	70.1	70.1	70.1	26.415	0	323.31	1286900000	515	86589000	120570000	152150000	136200000	111960000	174590000	172120000	136440000	129300000	135630000	126590000	100350000	tr|A2RI19|A2RI19_LACLMUncharacterizedproteinOS=Lactococcuslactissubsp.cremoris(strainMG1363)GN=llmg_0306PE=4SV=1	tr|A2RI19|A2RI19_LACLMUncharacterizedproteinOS=Lactococcuslactissubsp.cremoris(strainMG1363)GN=llmg_0306PE=4SV=1
tr|A2RI20|A2RI20_LACLM	tr|A2RI20|A2RI20_LACLM	3	2	3	2	2	3	4	5	5	3	2	4	6	6	6	29.1	29.1	29.1	21.616	0	30.028	37353000	67	2551900	1838600	3217200	0	7026900	2653000	6342500	5338700	5582300	7519600	6885500	7777300	tr|A2RI20|A2RI20_LACLMUncharacterizedproteinOS=Lactococcuslactissubsp.cremoris(strainMG1363)GN=llmg_0307PE=4SV=1	tr|A2RI20|A2RI20_LACLMUncharacterizedproteinOS=Lactococcuslactissubsp.cremoris(strainMG1363)GN=llmg_0307PE=4SV=1
tr|A2RI24|A2RI24_LACLM	tr|A2RI24|A2RI24_LACLM	10	6	8	4	4	8	8	6	7	6	3	5	13	13	13	57.8	57.8	57.8	29.823	0	128.78	205080000	123	27238000	22106000	12406000	15444000	12549000	24921000	16024000	15364000	13850000	12780000	23798000	11370000	tr|A2RI24|A2RI24_LACLMUncharacterizedproteinOS=Lactococcuslactissubsp.cremoris(strainMG1363)GN=llmg_0311PE=4SV=1	tr|A2RI24|A2RI24_LACLMUncharacterizedproteinOS=Lactococcuslactissubsp.cremoris(strainMG1363)GN=llmg_0311PE=4SV=1
tr|A2RI25|A2RI25_LACLM	tr|A2RI25|A2RI25_LACLM	5	5	4	4	4	1	4	5	3	4	4	3	7	7	7	21.2	21.2	21.2	37.53	0	11.751	110370000	31	7240600	5236900	9706400	5596900	6830700	0	4441000	5067900	5475900	4374800	3057300	9301800	tr|A2RI25|A2RI25_LACLMPhnDproteinOS=Lactococcuslactissubsp.cremoris(strainMG1363)GN=phnDPE=4SV=1	tr|A2RI25|A2RI25_LACLMPhnDproteinOS=Lactococcuslactissubsp.cremoris(strainMG1363)GN=phnDPE=4SV=1
tr|A2RI26|A2RI26_LACLM	tr|A2RI26|A2RI26_LACLM	4	3	2	2	1	2	3	2	3	3	2	3	4	4	4	23.2	23.2	23.2	27.468	0	32.952	15090000	18	1685600	1506300	2188800	1214600	0	1291400	1285000	1507000	2422100	2194900	1467300	1945800	tr|A2RI26|A2RI26_LACLMPhosphonatesimportATP-bindingproteinPhnCOS=Lactococcuslactissubsp.cremoris(strainMG1363)GN=phnCPE=3SV=1	tr|A2RI26|A2RI26_LACLMPhosphonatesimportATP-bindingproteinPhnCOS=Lactococcuslactissubsp.cremoris(strainMG1363)GN=phnCPE=3SV=1
tr|A2RI31|A2RI31_LACLM	tr|A2RI31|A2RI31_LACLM	6	6	5	7	6	7	7	7	7	6	7	7	8	8	8	60.6	60.6	60.6	17.517	0	323.31	747890000	504	126800000	173250000	149500000	381730000	328560000	363390000	522910000	290540000	340500000	272680000	228020000	206670000	tr|A2RI31|A2RI31_LACLMTpxproteinOS=Lactococcuslactissubsp.cremoris(strainMG1363)GN=tpxPE=4SV=1	tr|A2RI31|A2RI31_LACLMTpxproteinOS=Lactococcuslactissubsp.cremoris(strainMG1363)GN=tpxPE=4SV=1
tr|A2RI34|A2RI34_LACLM	tr|A2RI34|A2RI34_LACLM	4	3	3	4	3	3	4	4	4	2	2	2	6	6	6	31.8	31.8	31.8	18.505	0	37.983	105360000	60	7631500	8598100	7962200	5381900	4312900	5889800	5554900	6349800	7640500	6106000	9013400	9928400	tr|A2RI34|A2RI34_LACLMNapBproteinOS=Lactococcuslactissubsp.cremoris(strainMG1363)GN=napBPE=4SV=1	tr|A2RI34|A2RI34_LACLMNapBproteinOS=Lactococcuslactissubsp.cremoris(strainMG1363)GN=napBPE=4SV=1
tr|A2RI35|A2RI35_LACLM	tr|A2RI35|A2RI35_LACLM	10	9	10	7	5	8	5	6	6	7	5	5	13	13	13	25.5	25.5	25.5	47.523	0	61.555	239030000	126	13719000	16058000	15116000	8007700	10065000	9195000	7585900	10204000	8495900	19200000	11950000	15592000	tr|A2RI35|A2RI35_LACLMUncharacterizedproteinOS=Lactococcuslactissubsp.cremoris(strainMG1363)GN=llmg_0322PE=4SV=1	tr|A2RI35|A2RI35_LACLMUncharacterizedproteinOS=Lactococcuslactissubsp.cremoris(strainMG1363)GN=llmg_0322PE=4SV=1
tr|A2RI36|A2RI36_LACLM	tr|A2RI36|A2RI36_LACLM	4	0	2	2	4	2	3	2	3	2	3	2	8	8	8	62.9	62.9	62.9	13.459	0	45.973	10960000	54	2680100	0	1888400	2417800	560970	2684400	2223500	0	807560	2148900	1368600	1452700	tr|A2RI36|A2RI36_LACLMUncharacterizedproteinOS=Lactococcuslactissubsp.cremoris(strainMG1363)GN=llmg_0323PE=1SV=1	tr|A2RI36|A2RI36_LACLMUncharacterizedproteinOS=Lactococcuslactissubsp.cremoris(strainMG1363)GN=llmg_0323PE=1SV=1
tr|A2RI37|A2RI37_LACLM	tr|A2RI37|A2RI37_LACLM	31	27	26	26	23	25	22	23	22	24	24	22	33	33	33	50.3	50.3	50.3	63.873	0	323.31	4794600000	2450	185060000	165810000	195400000	237160000	125250000	151160000	176410000	138050000	131440000	147870000	108310000	141270000	tr|A2RI37|A2RI37_LACLMLmrCproteinOS=Lactococcuslactissubsp.cremoris(strainMG1363)GN=lmrCPE=4SV=1	tr|A2RI37|A2RI37_LACLMLmrCproteinOS=Lactococcuslactissubsp.cremoris(strainMG1363)GN=lmrCPE=4SV=1
tr|A2RI38|A2RI38_LACLM	tr|A2RI38|A2RI38_LACLM	32	35	22	16	16	20	21	22	19	22	22	20	36	36	36	55	55	55	73.997	0	323.31	5791800000	1377	169560000	163140000	158270000	141170000	72771000	91450000	85353000	79340000	75456000	96954000	76653000	77451000	tr|A2RI38|A2RI38_LACLMLmrDproteinOS=Lactococcuslactissubsp.cremoris(strainMG1363)GN=lmrDPE=4SV=1	tr|A2RI38|A2RI38_LACLMLmrDproteinOS=Lactococcuslactissubsp.cremoris(strainMG1363)GN=lmrDPE=4SV=1
tr|A2RI39|A2RI39_LACLM	tr|A2RI39|A2RI39_LACLM	17	19	13	15	9	10	10	12	12	10	12	10	22	22	22	53.1	53.1	53.1	44.887	0	153.7	828680000	329	85689000	64821000	63729000	34506000	88820000	22617000	28811000	38589000	48251000	57759000	66429000	71956000	tr|A2RI39|A2RI39_LACLMUDP-N-acetylglucosamine1-carboxyvinyltransferaseOS=Lactococcuslactissubsp.cremoris(strainMG1363)GN=murAPE=3SV=1	tr|A2RI39|A2RI39_LACLMUDP-N-acetylglucosamine1-carboxyvinyltransferaseOS=Lactococcuslactissubsp.cremoris(strainMG1363)GN=murAPE=3SV=1
tr|A2RI40|A2RI40_LACLM	tr|A2RI40|A2RI40_LACLM	1	0	0	1	1	1	0	0	0	1	1	1	2	2	2	23.6	23.6	23.6	8.4045	0	2.5399	3759800	8	0	0	0	0	0	0	0	0	0	0	0	266610	tr|A2RI40|A2RI40_LACLMUncharacterizedproteinOS=Lactococcuslactissubsp.cremoris(strainMG1363)GN=llmg_0327PE=4SV=1	tr|A2RI40|A2RI40_LACLMUncharacterizedproteinOS=Lactococcuslactissubsp.cremoris(strainMG1363)GN=llmg_0327PE=4SV=1
tr|A2RI46|A2RI46_LACLM	tr|A2RI46|A2RI46_LACLM	7	6	6	7	6	6	7	7	6	5	5	5	9	9	9	66.5	66.5	66.5	17.492	0	65.549	335850000	281	19501000	31304000	30833000	29041000	34475000	28484000	23745000	26176000	29056000	34779000	28509000	33509000	tr|A2RI46|A2RI46_LACLMCys-tRNA(Pro)/Cys-tRNA(Cys)deacylaseOS=Lactococcuslactissubsp.cremoris(strainMG1363)GN=llmg_0333PE=3SV=1	tr|A2RI46|A2RI46_LACLMCys-tRNA(Pro)/Cys-tRNA(Cys)deacylaseOS=Lactococcuslactissubsp.cremoris(strainMG1363)GN=llmg_0333PE=3SV=1
tr|A2RI48|A2RI48_LACLM	tr|A2RI48|A2RI48_LACLM	9	8	12	8	5	8	11	12	7	9	9	12	18	18	17	61.5	61.5	56.3	31.324	0	206.33	451590000	331	62747000	42734000	54875000	41816000	39657000	29470000	44742000	40096000	43354000	51055000	39415000	52946000	tr|A2RI48|A2RI48_LACLMLipoproteinOS=Lactococcuslactissubsp.cremoris(strainMG1363)GN=plpAPE=3SV=1	tr|A2RI48|A2RI48_LACLMLipoproteinOS=Lactococcuslactissubsp.cremoris(strainMG1363)GN=plpAPE=3SV=1
tr|A2RI49|A2RI49_LACLM	tr|A2RI49|A2RI49_LACLM	4	6	7	4	4	4	5	5	4	5	4	4	10	9	9	35	29.7	29.7	31.036	0	18.102	51248000	81	8373500	8707900	5469500	1548700	3034000	1701000	2071100	3207600	3950400	3613900	3652800	5669700	tr|A2RI49|A2RI49_LACLMLipoproteinOS=Lactococcuslactissubsp.cremoris(strainMG1363)GN=plpBPE=3SV=1	tr|A2RI49|A2RI49_LACLMLipoproteinOS=Lactococcuslactissubsp.cremoris(strainMG1363)GN=plpBPE=3SV=1
tr|A2RI50|A2RI50_LACLM	tr|A2RI50|A2RI50_LACLM	6	5	3	2	2	3	3	3	2	4	4	4	7	7	7	25.1	25.1	25.1	31.566	0	13.046	116430000	46	9419300	7408100	2536700	5302900	5760900	7184700	5494700	5863000	7282600	7274500	7370100	9037500	tr|A2RI50|A2RI50_LACLMLipoproteinOS=Lactococcuslactissubsp.cremoris(strainMG1363)GN=plpCPE=3SV=1	tr|A2RI50|A2RI50_LACLMLipoproteinOS=Lactococcuslactissubsp.cremoris(strainMG1363)GN=plpCPE=3SV=1
tr|A2RI52|A2RI52_LACLM	tr|A2RI52|A2RI52_LACLM	3	4	2	1	3	3	2	2	1	3	2	2	7	7	7	24.1	24.1	24.1	31.96	0	8.5924	29253000	21	0	0	0	0	520530	1056800	553980	839580	0	1205000	956630	788990	tr|A2RI52|A2RI52_LACLMLipoproteinOS=Lactococcuslactissubsp.cremoris(strainMG1363)GN=plpDPE=3SV=1	tr|A2RI52|A2RI52_LACLMLipoproteinOS=Lactococcuslactissubsp.cremoris(strainMG1363)GN=plpDPE=3SV=1
tr|A2RI54|A2RI54_LACLM	tr|A2RI54|A2RI54_LACLM	0	2	1	0	0	1	0	2	1	2	1	1	2	2	2	9.1	9.1	9.1	24.811	0	31.241	9944900	29	0	3791200	3341600	0	0	0	0	1440700	0	1524900	0	0	tr|A2RI54|A2RI54_LACLMUncharacterizedproteinOS=Lactococcuslactissubsp.cremoris(strainMG1363)GN=llmg_0342PE=3SV=1	tr|A2RI54|A2RI54_LACLMUncharacterizedproteinOS=Lactococcuslactissubsp.cremoris(strainMG1363)GN=llmg_0342PE=3SV=1
tr|A2RI56|A2RI56_LACLM	tr|A2RI56|A2RI56_LACLM	4	5	4	1	2	1	0	0	0	0	0	0	6	6	6	12	12	12	62.666	0	14.012	73113000	14	1362400	1232700	1680000	0	0	0	0	0	0	0	0	0	tr|A2RI56|A2RI56_LACLMCbiOproteinOS=Lactococcuslactissubsp.cremoris(strainMG1363)GN=cbiOPE=3SV=1	tr|A2RI56|A2RI56_LACLMCbiOproteinOS=Lactococcuslactissubsp.cremoris(strainMG1363)GN=cbiOPE=3SV=1
tr|A2RI58|A2RI58_LACLM	tr|A2RI58|A2RI58_LACLM	7	5	6	5	5	5	5	4	4	6	5	6	8	8	8	32	32	32	28.86	0	80.416	73015000	113	2407900	7571300	7018300	5230800	4992700	7089800	5738200	4847900	5853700	4825800	4777100	5380500	tr|A2RI58|A2RI58_LACLMFhuCproteinOS=Lactococcuslactissubsp.cremoris(strainMG1363)GN=fhuCPE=4SV=1	tr|A2RI58|A2RI58_LACLMFhuCproteinOS=Lactococcuslactissubsp.cremoris(strainMG1363)GN=fhuCPE=4SV=1
tr|A2RI61|A2RI61_LACLM	tr|A2RI61|A2RI61_LACLM	12	14	9	7	7	6	8	6	6	7	9	7	16	16	16	48.6	48.6	48.6	34.367	0	86.931	181740000	156	12615000	29795000	10108000	20745000	12477000	12129000	13733000	17038000	13386000	14047000	14221000	10904000	tr|A2RI61|A2RI61_LACLMFhuDproteinOS=Lactococcuslactissubsp.cremoris(strainMG1363)GN=fhuDPE=4SV=1	tr|A2RI61|A2RI61_LACLMFhuDproteinOS=Lactococcuslactissubsp.cremoris(strainMG1363)GN=fhuDPE=4SV=1
tr|A2RI62|A2RI62_LACLM	tr|A2RI62|A2RI62_LACLM	7	10	6	6	6	7	8	7	7	4	6	5	12	12	12	62.1	62.1	62.1	34.624	0	96.711	72252000	99	11152000	5140000	7870200	5959900	8925000	12010000	7458800	6572200	6328400	6050700	6015700	9559800	tr|A2RI62|A2RI62_LACLMFhuRproteinOS=Lactococcuslactissubsp.cremoris(strainMG1363)GN=fhuRPE=4SV=1	tr|A2RI62|A2RI62_LACLMFhuRproteinOS=Lactococcuslactissubsp.cremoris(strainMG1363)GN=fhuRPE=4SV=1
tr|A2RI64|A2RI64_LACLM	tr|A2RI64|A2RI64_LACLM	3	3	2	3	2	3	3	2	2	1	1	1	6	6	6	22.4	22.4	22.4	31.256	0	55.972	7302000	31	1372100	1165300	658640	686490	783390	322550	859470	783600	838350	0	0	0	tr|A2RI64|A2RI64_LACLMUncharacterizedproteinOS=Lactococcuslactissubsp.cremoris(strainMG1363)GN=llmg_0352PE=4SV=1	tr|A2RI64|A2RI64_LACLMUncharacterizedproteinOS=Lactococcuslactissubsp.cremoris(strainMG1363)GN=llmg_0352PE=4SV=1
tr|A2RI65|A2RI65_LACLM	tr|A2RI65|A2RI65_LACLM	2	0	2	2	3	2	2	2	2	2	2	2	4	4	4	30.4	30.4	30.4	13.081	0	15.681	7455700	29	0	0	0	2323100	2903900	1977000	1459300	3519700	2703500	1351200	1904800	2973400	tr|A2RI65|A2RI65_LACLMUncharacterizedproteinOS=Lactococcuslactissubsp.cremoris(strainMG1363)GN=llmg_0353PE=4SV=1	tr|A2RI65|A2RI65_LACLMUncharacterizedproteinOS=Lactococcuslactissubsp.cremoris(strainMG1363)GN=llmg_0353PE=4SV=1
tr|A2RI66|A2RI66_LACLM	tr|A2RI66|A2RI66_LACLM	3	3	3	2	0	1	3	3	1	0	0	0	6	6	6	44.6	44.6	44.6	15.533	0	26.842	93421000	31	11942000	11714000	14288000	0	0	0	0	0	0	0	0	0	tr|A2RI66|A2RI66_LACLMUncharacterizedproteinOS=Lactococcuslactissubsp.cremoris(strainMG1363)GN=llmg_0354PE=4SV=1	tr|A2RI66|A2RI66_LACLMUncharacterizedproteinOS=Lactococcuslactissubsp.cremoris(strainMG1363)GN=llmg_0354PE=4SV=1
tr|A2RI68|A2RI68_LACLM	tr|A2RI68|A2RI68_LACLM	7	7	8	8	6	7	8	8	8	7	7	7	8	8	8	43.9	43.9	43.9	20.757	0	323.31	3052400000	960	329870000	210350000	270560000	621890000	469210000	467650000	646510000	460130000	477680000	388740000	323020000	497240000	tr|A2RI68|A2RI68_LACLMAhpCproteinOS=Lactococcuslactissubsp.cremoris(strainMG1363)GN=ahpCPE=4SV=1	tr|A2RI68|A2RI68_LACLMAhpCproteinOS=Lactococcuslactissubsp.cremoris(strainMG1363)GN=ahpCPE=4SV=1
tr|A2RI69|A2RI69_LACLM	tr|A2RI69|A2RI69_LACLM	19	19	15	17	13	17	15	16	14	12	12	12	23	23	23	58.1	58.1	58.1	54.827	0	323.31	1929700000	415	85466000	85641000	75664000	81610000	113150000	118520000	84615000	80235000	75997000	120270000	101390000	104850000	tr|A2RI69|A2RI69_LACLMAhpFproteinOS=Lactococcuslactissubsp.cremoris(strainMG1363)GN=ahpFPE=3SV=1	tr|A2RI69|A2RI69_LACLMAhpFproteinOS=Lactococcuslactissubsp.cremoris(strainMG1363)GN=ahpFPE=3SV=1
tr|A2RI70|A2RI70_LACLM	tr|A2RI70|A2RI70_LACLM	19	19	13	15	12	14	15	15	15	15	15	12	23	23	23	46.7	46.7	46.7	77.6	0	323.31	1687800000	451	35283000	34767000	39176000	29430000	22593000	44421000	42579000	36906000	36693000	34769000	28319000	31525000	tr|A2RI70|A2RI70_LACLMPbp2BproteinOS=Lactococcuslactissubsp.cremoris(strainMG1363)GN=pbp2BPE=4SV=1	tr|A2RI70|A2RI70_LACLMPbp2BproteinOS=Lactococcuslactissubsp.cremoris(strainMG1363)GN=pbp2BPE=4SV=1
tr|A2RI73|A2RI73_LACLM	tr|A2RI73|A2RI73_LACLM	16	17	14	14	15	11	12	13	12	9	13	7	21	21	21	58.6	58.6	58.6	48.926	0	180.43	1061000000	278	50105000	33668000	60138000	62338000	57138000	84905000	81195000	46793000	52689000	48376000	60059000	59711000	tr|A2RI73|A2RI73_LACLMUDP-N-acetylmuramoyl-tripeptide--D-alanyl-D-alanineligaseOS=Lactococcuslactissubsp.cremoris(strainMG1363)GN=murFPE=3SV=1	tr|A2RI73|A2RI73_LACLMUDP-N-acetylmuramoyl-tripeptide--D-alanyl-D-alanineligaseOS=Lactococcuslactissubsp.cremoris(strainMG1363)GN=murFPE=3SV=1
tr|A2RI80|A2RI80_LACLM	tr|A2RI80|A2RI80_LACLM	32	32	35	27	30	27	28	27	26	23	25	21	37	37	37	70.1	70.1	70.1	61.616	0	323.31	16572000000	2296	412110000	429490000	342780000	418940000	425780000	635150000	521370000	396660000	367470000	316610000	283180000	391330000	tr|A2RI80|A2RI80_LACLMDEAD-boxATP-dependentRNAhelicaseCshAOS=Lactococcuslactissubsp.cremoris(strainMG1363)GN=rheAPE=3SV=1	tr|A2RI80|A2RI80_LACLMDEAD-boxATP-dependentRNAhelicaseCshAOS=Lactococcuslactissubsp.cremoris(strainMG1363)GN=rheAPE=3SV=1
tr|A2RI83|A2RI83_LACLM	tr|A2RI83|A2RI83_LACLM	9	11	6	8	6	5	3	3	2	2	3	4	18	18	18	34.5	34.5	34.5	60.372	0	42.583	118070000	51	1537100	2239900	1852800	2413500	2261400	2213500	2729000	1566700	1957600	2164100	2528400	2708400	tr|A2RI83|A2RI83_LACLMAsnBproteinOS=Lactococcuslactissubsp.cremoris(strainMG1363)GN=asnBPE=4SV=1	tr|A2RI83|A2RI83_LACLMAsnBproteinOS=Lactococcuslactissubsp.cremoris(strainMG1363)GN=asnBPE=4SV=1
tr|A2RI84|A2RI84_LACLM	tr|A2RI84|A2RI84_LACLM	5	5	7	10	7	8	8	8	9	10	8	7	16	16	16	47.4	47.4	47.4	31.195	0	42.197	74246000	134	13032000	10705000	13635000	16653000	13338000	12018000	17924000	18843000	14038000	17395000	11471000	14690000	tr|A2RI84|A2RI84_LACLMFormamidopyrimidine-DNAglycosylaseOS=Lactococcuslactissubsp.cremoris(strainMG1363)GN=mutMPE=3SV=1	tr|A2RI84|A2RI84_LACLMFormamidopyrimidine-DNAglycosylaseOS=Lactococcuslactissubsp.cremoris(strainMG1363)GN=mutMPE=3SV=1
tr|A2RI86|A2RI86_LACLM	tr|A2RI86|A2RI86_LACLM	2	3	3	2	3	3	3	3	1	3	2	3	3	3	3	6.3	6.3	6.3	51.523	0	209.04	41557000	186	7737500	3318600	6035800	3058300	1235500	2931700	1320400	2829800	0	2777000	3934300	3502400	tr|A2RI86|A2RI86_LACLMUncharacterizedproteinOS=Lactococcuslactissubsp.cremoris(strainMG1363)GN=llmg_0375PE=4SV=1	tr|A2RI86|A2RI86_LACLMUncharacterizedproteinOS=Lactococcuslactissubsp.cremoris(strainMG1363)GN=llmg_0375PE=4SV=1
tr|A2RI87|A2RI87_LACLM	tr|A2RI87|A2RI87_LACLM	1	1	1	1	1	2	1	2	1	3	3	3	4	4	4	8.9	8.9	8.9	51.33	0	3.9753	8788100	30	0	0	0	0	0	718730	0	1327900	0	1056500	1214700	3714300	tr|A2RI87|A2RI87_LACLMUncharacterizedproteinOS=Lactococcuslactissubsp.cremoris(strainMG1363)GN=llmg_0376PE=4SV=1	tr|A2RI87|A2RI87_LACLMUncharacterizedproteinOS=Lactococcuslactissubsp.cremoris(strainMG1363)GN=llmg_0376PE=4SV=1
tr|A2RI88|A2RI88_LACLM	tr|A2RI88|A2RI88_LACLM	5	3	5	1	3	2	5	3	3	3	2	1	5	5	5	51.6	51.6	51.6	14.694	0	90.586	76742000	64	10353000	11718000	7693900	0	23235000	4089300	7513000	10161000	14284000	5441800	4817100	0	tr|A2RI88|A2RI88_LACLMUncharacterizedproteinOS=Lactococcuslactissubsp.cremoris(strainMG1363)GN=llmg_0377PE=4SV=1	tr|A2RI88|A2RI88_LACLMUncharacterizedproteinOS=Lactococcuslactissubsp.cremoris(strainMG1363)GN=llmg_0377PE=4SV=1
tr|A2RI89|A2RI89_LACLM	tr|A2RI89|A2RI89_LACLM	2	3	2	3	4	5	4	3	4	6	5	2	6	6	6	58.9	58.9	58.9	12.822	0	47.239	86988000	124	29752000	20982000	15272000	7499600	19997000	7157500	8892200	15871000	17343000	32198000	19443000	10120000	tr|A2RI89|A2RI89_LACLMUPF0298proteinllmg_0378OS=Lactococcuslactissubsp.cremoris(strainMG1363)GN=llmg_0378PE=3SV=1	tr|A2RI89|A2RI89_LACLMUPF0298proteinllmg_0378OS=Lactococcuslactissubsp.cremoris(strainMG1363)GN=llmg_0378PE=3SV=1
tr|A2RI91|A2RI91_LACLM	tr|A2RI91|A2RI91_LACLM	6	5	7	6	8	5	9	10	9	7	6	10	11	11	11	57.9	57.9	57.9	22.99	0	40.045	404850000	149	38337000	50495000	34926000	51253000	33478000	49366000	49205000	54932000	48554000	55532000	99339000	55164000	tr|A2RI91|A2RI91_LACLMUncharacterizedproteinOS=Lactococcuslactissubsp.cremoris(strainMG1363)GN=llmg_0380PE=4SV=1	tr|A2RI91|A2RI91_LACLMUncharacterizedproteinOS=Lactococcuslactissubsp.cremoris(strainMG1363)GN=llmg_0380PE=4SV=1
tr|A2RI93|A2RI93_LACLM	tr|A2RI93|A2RI93_LACLM	5	5	9	6	6	7	5	4	4	5	4	4	9	9	9	44.7	44.7	44.7	25.909	0	197.97	214810000	122	28511000	25236000	24042000	20768000	21117000	17534000	17172000	20878000	20749000	14236000	17094000	27892000	tr|A2RI93|A2RI93_LACLMUncharacterizedproteinOS=Lactococcuslactissubsp.cremoris(strainMG1363)GN=llmg_0382PE=4SV=1	tr|A2RI93|A2RI93_LACLMUncharacterizedproteinOS=Lactococcuslactissubsp.cremoris(strainMG1363)GN=llmg_0382PE=4SV=1
tr|A2RI95|A2RI95_LACLM	tr|A2RI95|A2RI95_LACLM	3	4	3	3	2	3	3	4	4	2	2	3	8	8	8	29	29	29	33.404	0	14.933	23700000	36	2171800	1247900	2185600	2027800	2256400	2329100	2132000	1733000	2340300	2755600	1050400	2895500	tr|A2RI95|A2RI95_LACLMPseudouridinesynthaseOS=Lactococcuslactissubsp.cremoris(strainMG1363)GN=rluEPE=3SV=1	tr|A2RI95|A2RI95_LACLMPseudouridinesynthaseOS=Lactococcuslactissubsp.cremoris(strainMG1363)GN=rluEPE=3SV=1
tr|A2RI96|A2RI96_LACLM	tr|A2RI96|A2RI96_LACLM	16	14	12	13	13	12	13	13	11	12	11	12	17	17	17	75.5	75.5	75.5	30.064	0	323.31	1178700000	914	119090000	151810000	149770000	120900000	121070000	182600000	119000000	93894000	98704000	99750000	80062000	70337000	tr|A2RI96|A2RI96_LACLMPpiAproteinOS=Lactococcuslactissubsp.cremoris(strainMG1363)GN=ppiAPE=3SV=1	tr|A2RI96|A2RI96_LACLMPpiAproteinOS=Lactococcuslactissubsp.cremoris(strainMG1363)GN=ppiAPE=3SV=1
tr|A2RI97|A2RI97_LACLM	tr|A2RI97|A2RI97_LACLM	3	3	3	2	2	2	2	2	1	3	3	4	4	4	4	7.1	7.1	7.1	51.946	0	8.1602	68040000	84	5944800	6253700	4008700	4983800	5329800	4226800	1864200	3972100	0	3614600	4999600	4142800	tr|A2RI97|A2RI97_LACLMLysQproteinOS=Lactococcuslactissubsp.cremoris(strainMG1363)GN=lysQPE=4SV=1	tr|A2RI97|A2RI97_LACLMLysQproteinOS=Lactococcuslactissubsp.cremoris(strainMG1363)GN=lysQPE=4SV=1
tr|A2RI98|A2RI98_LACLM	tr|A2RI98|A2RI98_LACLM	3	3	0	1	1	1	1	1	1	0	0	0	3	3	3	12.4	12.4	12.4	30.382	0	3.2135	8420000	17	1248800	1572500	0	0	0	0	0	0	0	0	0	0	tr|A2RI98|A2RI98_LACLMUncharacterizedproteinOS=Lactococcuslactissubsp.cremoris(strainMG1363)GN=llmg_0387PE=4SV=1	tr|A2RI98|A2RI98_LACLMUncharacterizedproteinOS=Lactococcuslactissubsp.cremoris(strainMG1363)GN=llmg_0387PE=4SV=1
tr|A2RI99|A2RI99_LACLM	tr|A2RI99|A2RI99_LACLM	1	2	1	2	1	0	1	1	1	1	1	1	3	3	3	9.2	9.2	9.2	36.62	0	2.6404	2945100	12	0	434610	0	0	0	0	0	0	0	0	0	0	tr|A2RI99|A2RI99_LACLMApbEproteinOS=Lactococcuslactissubsp.cremoris(strainMG1363)GN=apbEPE=4SV=1	tr|A2RI99|A2RI99_LACLMApbEproteinOS=Lactococcuslactissubsp.cremoris(strainMG1363)GN=apbEPE=4SV=1
tr|A2RIA4|A2RIA4_LACLM	tr|A2RIA4|A2RIA4_LACLM	3	2	2	0	0	1	3	2	0	4	1	4	6	6	5	27.5	27.5	24.9	31.449	0	4.7303	7941800	19	1962200	1359100	0	0	0	0	1156500	3881800	0	1830000	0	1178500	tr|A2RIA4|A2RIA4_LACLMRlrDproteinOS=Lactococcuslactissubsp.cremoris(strainMG1363)GN=rlrDPE=4SV=1	tr|A2RIA4|A2RIA4_LACLMRlrDproteinOS=Lactococcuslactissubsp.cremoris(strainMG1363)GN=rlrDPE=4SV=1
tr|A2RIA7|A2RIA7_LACLM	tr|A2RIA7|A2RIA7_LACLM	4	2	3	3	3	1	5	5	5	4	3	6	6	6	6	34.8	34.8	34.8	21.975	0	48.768	260200000	118	19075000	21435000	16291000	28912000	34798000	0	25917000	29049000	23620000	21869000	28361000	27981000	tr|A2RIA7|A2RIA7_LACLMFMN-dependentNADH-azoreductaseOS=Lactococcuslactissubsp.cremoris(strainMG1363)GN=azoRPE=3SV=1	tr|A2RIA7|A2RIA7_LACLMFMN-dependentNADH-azoreductaseOS=Lactococcuslactissubsp.cremoris(strainMG1363)GN=azoRPE=3SV=1
tr|A2RIA8|A2RIA8_LACLM	tr|A2RIA8|A2RIA8_LACLM	1	1	1	0	1	1	2	0	0	1	1	1	2	2	2	17.4	17.4	17.4	15.602	0	34.471	1179200	13	0	0	0	0	0	0	0	0	0	0	0	1222300	tr|A2RIA8|A2RIA8_LACLMUncharacterizedproteinOS=Lactococcuslactissubsp.cremoris(strainMG1363)GN=llmg_0398PE=4SV=1	tr|A2RIA8|A2RIA8_LACLMUncharacterizedproteinOS=Lactococcuslactissubsp.cremoris(strainMG1363)GN=llmg_0398PE=4SV=1
tr|A2RIA9|A2RIA9_LACLM	tr|A2RIA9|A2RIA9_LACLM	3	4	2	2	4	4	2	5	2	9	6	7	9	9	9	18.2	18.2	18.2	76.144	0	47.356	46243000	101	4658300	3017700	1457500	1600700	4575200	1715800	1903500	3660600	1403000	4582600	2608100	3528000	tr|A2RIA9|A2RIA9_LACLMNhaproteinOS=Lactococcuslactissubsp.cremoris(strainMG1363)GN=nhaPE=4SV=1	tr|A2RIA9|A2RIA9_LACLMNhaproteinOS=Lactococcuslactissubsp.cremoris(strainMG1363)GN=nhaPE=4SV=1
tr|A2RIB0|A2RIB0_LACLM	tr|A2RIB0|A2RIB0_LACLM	5	6	6	6	5	4	7	5	6	5	6	5	9	9	9	45.5	45.5	45.5	18.263	0	122.48	81693000	164	3850700	7842200	12288000	12741000	7457500	13300000	11891000	19706000	14190000	15417000	17611000	21534000	tr|A2RIB0|A2RIB0_LACLMUncharacterizedproteinOS=Lactococcuslactissubsp.cremoris(strainMG1363)GN=llmg_0400PE=4SV=1	tr|A2RIB0|A2RIB0_LACLMUncharacterizedproteinOS=Lactococcuslactissubsp.cremoris(strainMG1363)GN=llmg_0400PE=4SV=1
tr|A2RIB2|A2RIB2_LACLM	tr|A2RIB2|A2RIB2_LACLM	22	22	16	19	15	15	15	15	12	15	16	14	32	32	32	47.4	47.4	47.4	87.844	0	323.31	1089200000	338	52815000	54637000	72527000	100580000	76666000	51709000	35038000	57656000	66705000	93466000	72197000	85180000	tr|A2RIB2|A2RIB2_LACLMPbp1BproteinOS=Lactococcuslactissubsp.cremoris(strainMG1363)GN=pbp1BPE=4SV=1	tr|A2RIB2|A2RIB2_LACLMPbp1BproteinOS=Lactococcuslactissubsp.cremoris(strainMG1363)GN=pbp1BPE=4SV=1
tr|A2RIB5|A2RIB5_LACLM	tr|A2RIB5|A2RIB5_LACLM	5	5	5	5	6	6	6	6	5	4	5	5	6	6	6	42.9	42.9	42.9	12.087	0	289.65	764450000	533	137120000	135900000	106340000	104910000	110700000	80951000	102410000	100460000	199100000	151930000	110560000	166330000	tr|A2RIB5|A2RIB5_LACLMTrxHproteinOS=Lactococcuslactissubsp.cremoris(strainMG1363)GN=trxHPE=4SV=1	tr|A2RIB5|A2RIB5_LACLMTrxHproteinOS=Lactococcuslactissubsp.cremoris(strainMG1363)GN=trxHPE=4SV=1
tr|A2RIB6|A2RIB6_LACLM	tr|A2RIB6|A2RIB6_LACLM	8	8	8	8	7	8	9	9	8	8	7	8	9	9	9	56.2	56.2	56.2	22.188	0	323.31	1657100000	456	187100000	190420000	135520000	117350000	150840000	200150000	123310000	142340000	107820000	184020000	161690000	106770000	tr|A2RIB6|A2RIB6_LACLMPheTproteinOS=Lactococcuslactissubsp.cremoris(strainMG1363)GN=pheTPE=4SV=1	tr|A2RIB6|A2RIB6_LACLMPheTproteinOS=Lactococcuslactissubsp.cremoris(strainMG1363)GN=pheTPE=4SV=1
tr|A2RIC1|A2RIC1_LACLM	tr|A2RIC1|A2RIC1_LACLM	2	1	1	2	2	2	3	3	1	0	2	1	4	4	4	24.8	24.8	24.8	30.474	0	4.4285	22112000	32	3138300	0	0	9411000	11163000	3474400	3803800	5168400	0	0	3429300	0	tr|A2RIC1|A2RIC1_LACLMVicXproteinOS=Lactococcuslactissubsp.cremoris(strainMG1363)GN=vicXPE=4SV=1	tr|A2RIC1|A2RIC1_LACLMVicXproteinOS=Lactococcuslactissubsp.cremoris(strainMG1363)GN=vicXPE=4SV=1
tr|A2RIC2|A2RIC2_LACLM	tr|A2RIC2|A2RIC2_LACLM	6	8	1	6	5	5	3	3	4	4	6	5	11	11	11	28	28	28	54.143	0	26.89	129230000	61	11499000	7830100	0	6250200	8407100	8900300	4057700	5136800	3710500	6465600	3317900	8332600	tr|A2RIC2|A2RIC2_LACLMHistidinekinaseOS=Lactococcuslactissubsp.cremoris(strainMG1363)GN=kinCPE=4SV=1	tr|A2RIC2|A2RIC2_LACLMHistidinekinaseOS=Lactococcuslactissubsp.cremoris(strainMG1363)GN=kinCPE=4SV=1
tr|A2RIC3|A2RIC3_LACLM	tr|A2RIC3|A2RIC3_LACLM	28	22	22	27	21	25	24	24	22	23	23	23	30	30	30	90.1	90.1	90.1	26.765	0	323.31	9029100000	3064	1219500000	821700000	974320000	1125100000	1347100000	1054700000	1065600000	963870000	982350000	750200000	994440000	1028000000	tr|A2RIC3|A2RIC3_LACLMLlrCproteinOS=Lactococcuslactissubsp.cremoris(strainMG1363)GN=llrCPE=4SV=1	tr|A2RIC3|A2RIC3_LACLMLlrCproteinOS=Lactococcuslactissubsp.cremoris(strainMG1363)GN=llrCPE=4SV=1
tr|A2RIC5|A2RIC5_LACLM	tr|A2RIC5|A2RIC5_LACLM	8	9	4	6	7	5	5	7	8	7	8	7	10	10	10	44.1	44.1	44.1	33.053	0	118.29	71273000	126	9493900	7104500	10222000	9032400	6266500	20641000	14434000	11052000	10165000	9699300	10407000	9433600	tr|A2RIC5|A2RIC5_LACLMHolBproteinOS=Lactococcuslactissubsp.cremoris(strainMG1363)GN=holBPE=4SV=1	tr|A2RIC5|A2RIC5_LACLMHolBproteinOS=Lactococcuslactissubsp.cremoris(strainMG1363)GN=holBPE=4SV=1
tr|A2RIC6|A2RIC6_LACLM	tr|A2RIC6|A2RIC6_LACLM	7	5	4	4	4	4	6	3	5	4	3	4	8	8	8	40	40	40	29.82	0	59.775	197030000	80	33819000	15145000	21191000	13751000	18607000	21933000	28604000	35868000	31899000	29161000	48876000	26416000	tr|A2RIC6|A2RIC6_LACLMUncharacterizedproteinOS=Lactococcuslactissubsp.cremoris(strainMG1363)GN=llmg_0417PE=4SV=1	tr|A2RIC6|A2RIC6_LACLMUncharacterizedproteinOS=Lactococcuslactissubsp.cremoris(strainMG1363)GN=llmg_0417PE=4SV=1
tr|A2RIC8|A2RIC8_LACLM	tr|A2RIC8|A2RIC8_LACLM	4	10	4	4	3	5	3	4	3	3	5	3	10	10	10	46.7	46.7	46.7	32.631	0	93.923	33279000	81	2619700	2477300	2652800	3897000	2902100	4804000	3732500	4765600	4085600	3322600	2527900	2217200	tr|A2RIC8|A2RIC8_LACLMRibosomalRNAsmallsubunitmethyltransferaseIOS=Lactococcuslactissubsp.cremoris(strainMG1363)GN=rsmIPE=3SV=1	tr|A2RIC8|A2RIC8_LACLMRibosomalRNAsmallsubunitmethyltransferaseIOS=Lactococcuslactissubsp.cremoris(strainMG1363)GN=rsmIPE=3SV=1
tr|A2RID3|A2RID3_LACLM	tr|A2RID3|A2RID3_LACLM	6	8	5	7	6	5	5	6	5	6	6	6	10	10	10	56	56	56	19.338	0	96.187	71764000	154	7884800	12816000	25179000	9080500	14555000	19283000	11108000	13492000	10142000	21350000	18499000	22862000	tr|A2RID3|A2RID3_LACLMUncharacterizedproteinOS=Lactococcuslactissubsp.cremoris(strainMG1363)GN=llmg_0424PE=4SV=1	tr|A2RID3|A2RID3_LACLMUncharacterizedproteinOS=Lactococcuslactissubsp.cremoris(strainMG1363)GN=llmg_0424PE=4SV=1
tr|A2RID4|A2RID4_LACLM	tr|A2RID4|A2RID4_LACLM	17	19	10	11	10	14	14	14	15	10	12	9	24	24	24	60.3	60.3	60.3	34.218	0	323.31	205740000	304	36690000	27824000	37586000	25880000	28686000	30820000	32622000	24669000	24194000	23811000	20383000	29518000	tr|A2RID4|A2RID4_LACLMMvkproteinOS=Lactococcuslactissubsp.cremoris(strainMG1363)GN=mvkPE=3SV=1	tr|A2RID4|A2RID4_LACLMMvkproteinOS=Lactococcuslactissubsp.cremoris(strainMG1363)GN=mvkPE=3SV=1
tr|A2RID5|A2RID5_LACLM	tr|A2RID5|A2RID5_LACLM	6	13	5	7	6	8	5	9	9	4	7	3	14	14	14	44.7	44.7	44.7	34.99	0	211.57	2745400000	155	45669000	39778000	32896000	16773000	18648000	13344000	12606000	19157000	16013000	9626000	14654000	27462000	tr|A2RID5|A2RID5_LACLMMvaDproteinOS=Lactococcuslactissubsp.cremoris(strainMG1363)GN=mvaDPE=4SV=1	tr|A2RID5|A2RID5_LACLMMvaDproteinOS=Lactococcuslactissubsp.cremoris(strainMG1363)GN=mvaDPE=4SV=1
tr|A2RID6|A2RID6_LACLM	tr|A2RID6|A2RID6_LACLM	6	6	2	3	3	2	5	5	5	1	2	1	9	9	9	32.2	32.2	32.2	36.345	0	94.432	31228000	30	3655300	3472100	3232300	1935500	4008200	4897300	4415700	2887000	3847200	0	5000600	0	tr|A2RID6|A2RID6_LACLMUncharacterizedproteinOS=Lactococcuslactissubsp.cremoris(strainMG1363)GN=llmg_0427PE=3SV=1	tr|A2RID6|A2RID6_LACLMUncharacterizedproteinOS=Lactococcuslactissubsp.cremoris(strainMG1363)GN=llmg_0427PE=3SV=1
tr|A2RID7|A2RID7_LACLM	tr|A2RID7|A2RID7_LACLM	9	9	3	7	5	5	8	8	8	5	6	6	13	13	13	37	37	37	38.808	0	37.214	34244000	60	3138000	2025500	2689400	3863800	3450900	6172000	4990400	4084100	4393400	5420400	4179800	5077300	tr|A2RID7|A2RID7_LACLMIsopentenyl-diphosphatedelta-isomeraseOS=Lactococcuslactissubsp.cremoris(strainMG1363)GN=fniPE=3SV=1	tr|A2RID7|A2RID7_LACLMIsopentenyl-diphosphatedelta-isomeraseOS=Lactococcuslactissubsp.cremoris(strainMG1363)GN=fniPE=3SV=1
tr|A2RIE0|A2RIE0_LACLM	tr|A2RIE0|A2RIE0_LACLM	0	2	1	0	1	1	1	2	2	0	0	1	4	4	4	22.4	22.4	22.4	25.373	0	16.303	9067500	10	0	1000500	0	0	0	0	0	0	0	0	0	0	tr|A2RIE0|A2RIE0_LACLMFMN-dependentNADH-azoreductaseOS=Lactococcuslactissubsp.cremoris(strainMG1363)GN=azoRPE=3SV=1	tr|A2RIE0|A2RIE0_LACLMFMN-dependentNADH-azoreductaseOS=Lactococcuslactissubsp.cremoris(strainMG1363)GN=azoRPE=3SV=1
tr|A2RIE2|A2RIE2_LACLM	tr|A2RIE2|A2RIE2_LACLM	32	33	24	26	27	23	25	24	21	16	23	20	36	36	36	75.6	75.6	75.6	50.463	0	323.31	3836400000	646	165340000	171790000	140170000	149320000	156840000	114590000	116700000	134140000	142440000	161370000	141780000	166410000	tr|A2RIE2|A2RIE2_LACLMDEAD-boxATP-dependentRNAhelicaseCshBOS=Lactococcuslactissubsp.cremoris(strainMG1363)GN=rheBPE=3SV=1	tr|A2RIE2|A2RIE2_LACLMDEAD-boxATP-dependentRNAhelicaseCshBOS=Lactococcuslactissubsp.cremoris(strainMG1363)GN=rheBPE=3SV=1
tr|A2RIE3|A2RIE3_LACLM	tr|A2RIE3|A2RIE3_LACLM	3	5	3	3	2	3	4	2	4	3	3	3	7	7	7	35.6	35.6	35.6	21.505	0	29.917	57569000	33	1718600	3583500	2989000	3437300	1212000	1849400	829330	1788800	1362200	3715100	1943600	2171500	tr|A2RIE3|A2RIE3_LACLMUncharacterizedproteinOS=Lactococcuslactissubsp.cremoris(strainMG1363)GN=llmg_0434PE=4SV=1	tr|A2RIE3|A2RIE3_LACLMUncharacterizedproteinOS=Lactococcuslactissubsp.cremoris(strainMG1363)GN=llmg_0434PE=4SV=1
tr|A2RIE4|A2RIE4_LACLM	tr|A2RIE4|A2RIE4_LACLM	3	2	4	3	1	4	3	4	3	2	3	3	5	5	5	21.8	21.8	21.8	28.048	0	35.27	19519000	34	2324400	1852900	615790	1294800	0	1259600	1406700	1375800	3013600	1176800	2570400	3361200	tr|A2RIE4|A2RIE4_LACLMHexRproteinOS=Lactococcuslactissubsp.cremoris(strainMG1363)GN=hexRPE=4SV=1	tr|A2RIE4|A2RIE4_LACLMHexRproteinOS=Lactococcuslactissubsp.cremoris(strainMG1363)GN=hexRPE=4SV=1
tr|A2RIE6|A2RIE6_LACLM	tr|A2RIE6|A2RIE6_LACLM	6	4	10	6	5	8	8	5	7	7	7	6	11	11	11	92.6	92.6	92.6	11.324	0	99.444	212620000	170	18739000	21771000	23864000	24002000	12790000	10189000	10566000	14371000	9563500	7251100	9226500	9348100	tr|A2RIE6|A2RIE6_LACLMPtcBproteinOS=Lactococcuslactissubsp.cremoris(strainMG1363)GN=ptcBPE=4SV=1	tr|A2RIE6|A2RIE6_LACLMPtcBproteinOS=Lactococcuslactissubsp.cremoris(strainMG1363)GN=ptcBPE=4SV=1
tr|A2RIE7|A2RIE7_LACLM	tr|A2RIE7|A2RIE7_LACLM	6	5	6	5	7	8	6	5	5	5	5	5	8	8	8	75.9	75.9	75.9	12.885	0	323.31	73201000	255	14442000	16414000	12725000	10862000	10654000	14342000	5196700	9512700	9007100	7998800	6539000	9897600	tr|A2RIE7|A2RIE7_LACLMPtcAproteinOS=Lactococcuslactissubsp.cremoris(strainMG1363)GN=ptcAPE=4SV=1	tr|A2RIE7|A2RIE7_LACLMPtcAproteinOS=Lactococcuslactissubsp.cremoris(strainMG1363)GN=ptcAPE=4SV=1
tr|A2RIF0|A2RIF0_LACLM	tr|A2RIF0|A2RIF0_LACLM	0	0	0	1	1	2	1	1	1	1	1	1	2	2	2	5	5	5	55.069	0.0080053	1.3536	8739100	27	0	0	0	0	0	0	0	0	0	0	0	18415000	tr|A2RIF0|A2RIF0_LACLMBglAproteinOS=Lactococcuslactissubsp.cremoris(strainMG1363)GN=bglAPE=3SV=1	tr|A2RIF0|A2RIF0_LACLMBglAproteinOS=Lactococcuslactissubsp.cremoris(strainMG1363)GN=bglAPE=3SV=1
tr|A2RIF4|A2RIF4_LACLM	tr|A2RIF4|A2RIF4_LACLM	9	9	6	10	8	9	7	8	10	5	6	7	14	14	14	52	52	52	37.278	0	80.573	216410000	106	16706000	23781000	17089000	21086000	12413000	14515000	20608000	20634000	17718000	19972000	22686000	30474000	tr|A2RIF4|A2RIF4_LACLMUncharacterizedproteinOS=Lactococcuslactissubsp.cremoris(strainMG1363)GN=llmg_0445PE=4SV=1	tr|A2RIF4|A2RIF4_LACLMUncharacterizedproteinOS=Lactococcuslactissubsp.cremoris(strainMG1363)GN=llmg_0445PE=4SV=1
tr|A2RIF5|A2RIF5_LACLM	tr|A2RIF5|A2RIF5_LACLM	19	18	13	12	13	10	10	14	12	8	10	9	21	21	21	52.6	52.6	52.6	42.078	0	323.31	768900000	370	87304000	55514000	62373000	18029000	37349000	41502000	27498000	33407000	31785000	32648000	24808000	43677000	tr|A2RIF5|A2RIF5_LACLMMsmKproteinOS=Lactococcuslactissubsp.cremoris(strainMG1363)GN=msmKPE=4SV=1	tr|A2RIF5|A2RIF5_LACLMMsmKproteinOS=Lactococcuslactissubsp.cremoris(strainMG1363)GN=msmKPE=4SV=1
tr|A2RIF6|A2RIF6_LACLM	tr|A2RIF6|A2RIF6_LACLM	21	23	15	29	27	24	34	29	34	35	25	29	42	42	42	43.7	43.7	43.7	135.15	0	323.31	624620000	1132	110220000	102400000	75143000	87156000	89491000	92895000	122040000	76370000	93764000	136520000	86141000	89959000	tr|A2RIF6|A2RIF6_LACLMPyruvate-flavodoxinoxidoreductaseOS=Lactococcuslactissubsp.cremoris(strainMG1363)GN=nifJPE=3SV=1	tr|A2RIF6|A2RIF6_LACLMPyruvate-flavodoxinoxidoreductaseOS=Lactococcuslactissubsp.cremoris(strainMG1363)GN=nifJPE=3SV=1
tr|A2RIF7|A2RIF7_LACLM	tr|A2RIF7|A2RIF7_LACLM	4	3	5	1	4	4	3	5	5	7	5	6	7	7	7	20.9	20.9	20.9	32.395	0	47.279	46462000	88	3371000	7180600	7988800	0	2517100	4928700	4870000	6796700	6178000	2095400	5309400	8899800	tr|A2RIF7|A2RIF7_LACLMUncharacterizedproteinOS=Lactococcuslactissubsp.cremoris(strainMG1363)GN=llmg_0448PE=4SV=1	tr|A2RIF7|A2RIF7_LACLMUncharacterizedproteinOS=Lactococcuslactissubsp.cremoris(strainMG1363)GN=llmg_0448PE=4SV=1
tr|A2RIG1|A2RIG1_LACLM	tr|A2RIG1|A2RIG1_LACLM	3	1	3	5	4	3	5	6	2	2	4	2	8	8	8	39.5	39.5	39.5	27.501	0	33.278	64991000	54	7375600	0	9393500	7238900	10512000	22947000	13059000	7427500	13998000	10204000	5426700	6696900	tr|A2RIG1|A2RIG1_LACLMTreRproteinOS=Lactococcuslactissubsp.cremoris(strainMG1363)GN=treRPE=4SV=1	tr|A2RIG1|A2RIG1_LACLMTreRproteinOS=Lactococcuslactissubsp.cremoris(strainMG1363)GN=treRPE=4SV=1
tr|A2RIG2|A2RIG2_LACLM	tr|A2RIG2|A2RIG2_LACLM	14	18	16	12	13	15	16	16	14	14	13	13	20	20	20	86.3	86.3	86.3	17.234	0	323.31	8208400000	2371	652820000	962910000	846340000	852630000	1075600000	1161700000	1639000000	1106000000	1030600000	726940000	704420000	456730000	tr|A2RIG2|A2RIG2_LACLMUncharacterizedproteinOS=Lactococcuslactissubsp.cremoris(strainMG1363)GN=llmg_0453PE=4SV=1	tr|A2RIG2|A2RIG2_LACLMUncharacterizedproteinOS=Lactococcuslactissubsp.cremoris(strainMG1363)GN=llmg_0453PE=4SV=1
tr|A2RIG3|A2RIG3_LACLM	tr|A2RIG3|A2RIG3_LACLM	4	4	3	3	3	2	2	2	2	4	2	4	6	6	6	17.3	17.3	17.3	54.641	0	209.03	877330000	207	67692000	75986000	60632000	33449000	34554000	400070000	81548000	231260000	205020000	457110000	228560000	373920000	tr|A2RIG3|A2RIG3_LACLMUncharacterizedproteinOS=Lactococcuslactissubsp.cremoris(strainMG1363)GN=llmg_0454PE=4SV=1	tr|A2RIG3|A2RIG3_LACLMUncharacterizedproteinOS=Lactococcuslactissubsp.cremoris(strainMG1363)GN=llmg_0454PE=4SV=1
tr|A2RIG4|A2RIG4_LACLM	tr|A2RIG4|A2RIG4_LACLM	43	48	38	40	39	41	45	42	41	33	38	32	54	54	54	69.4	69.4	69.4	86.862	0	323.31	25708000000	4429	843930000	1158700000	808240000	1897100000	1819300000	2438900000	3041800000	1911900000	1232100000	1437600000	1910300000	1767300000	tr|A2RIG4|A2RIG4_LACLMTrePPproteinOS=Lactococcuslactissubsp.cremoris(strainMG1363)GN=trePPPE=4SV=1	tr|A2RIG4|A2RIG4_LACLMTrePPproteinOS=Lactococcuslactissubsp.cremoris(strainMG1363)GN=trePPPE=4SV=1
tr|A2RIG5|A2RIG5_LACLM	tr|A2RIG5|A2RIG5_LACLM	16	14	14	13	12	12	12	11	13	12	10	13	16	16	16	87.8	87.8	87.8	24.067	0	171.03	2641900000	635	309470000	354510000	248710000	193900000	168870000	349420000	134770000	202160000	189800000	223540000	275750000	197930000	tr|A2RIG5|A2RIG5_LACLMPgmBproteinOS=Lactococcuslactissubsp.cremoris(strainMG1363)GN=pgmBPE=4SV=1	tr|A2RIG5|A2RIG5_LACLMPgmBproteinOS=Lactococcuslactissubsp.cremoris(strainMG1363)GN=pgmBPE=4SV=1
tr|A2RIG8|A2RIG8_LACLM	tr|A2RIG8|A2RIG8_LACLM	4	4	3	3	3	4	3	3	3	2	2	3	5	5	5	28.4	28.4	28.4	16.875	0	59.967	111440000	89	10000000	8090100	13030000	9831000	2739500	4705000	5899000	7657800	9748400	4344300	5347500	5883600	tr|A2RIG8|A2RIG8_LACLMUncharacterizedproteinOS=Lactococcuslactissubsp.cremoris(strainMG1363)GN=llmg_0459PE=4SV=1	tr|A2RIG8|A2RIG8_LACLMUncharacterizedproteinOS=Lactococcuslactissubsp.cremoris(strainMG1363)GN=llmg_0459PE=4SV=1
tr|A2RIG9|A2RIG9_LACLM	tr|A2RIG9|A2RIG9_LACLM	1	1	1	3	3	3	3	3	3	2	4	3	4	4	4	14	14	14	19.625	0	3.0114	21981000	44	0	0	0	6233600	6990700	6489600	3945800	6716300	4543800	5997300	6489700	11550000	tr|A2RIG9|A2RIG9_LACLMUncharacterizedproteinOS=Lactococcuslactissubsp.cremoris(strainMG1363)GN=llmg_0460PE=4SV=1	tr|A2RIG9|A2RIG9_LACLMUncharacterizedproteinOS=Lactococcuslactissubsp.cremoris(strainMG1363)GN=llmg_0460PE=4SV=1
tr|A2RIH0|A2RIH0_LACLM	tr|A2RIH0|A2RIH0_LACLM	12	10	9	10	7	8	7	8	11	6	8	7	14	14	14	34.6	34.6	34.6	49.133	0	323.31	723240000	220	17969000	21242000	30366000	11939000	24647000	38131000	25581000	18207000	25053000	32470000	24806000	26982000	tr|A2RIH0|A2RIH0_LACLMLytRproteinOS=Lactococcuslactissubsp.cremoris(strainMG1363)GN=lytRPE=4SV=1	tr|A2RIH0|A2RIH0_LACLMLytRproteinOS=Lactococcuslactissubsp.cremoris(strainMG1363)GN=lytRPE=4SV=1
tr|A2RIH2|A2RIH2_LACLM	tr|A2RIH2|A2RIH2_LACLM	8	8	8	8	6	10	7	4	5	5	4	6	14	14	14	58.4	58.4	58.4	28.835	0	126.39	256220000	111	26215000	38484000	41076000	22084000	31124000	22027000	26139000	31586000	33608000	28285000	42695000	31947000	tr|A2RIH2|A2RIH2_LACLMThiD2proteinOS=Lactococcuslactissubsp.cremoris(strainMG1363)GN=thiD2PE=4SV=1	tr|A2RIH2|A2RIH2_LACLMThiD2proteinOS=Lactococcuslactissubsp.cremoris(strainMG1363)GN=thiD2PE=4SV=1
tr|A2RIH5|A2RIH5_LACLM	tr|A2RIH5|A2RIH5_LACLM	3	3	2	1	1	0	1	0	0	0	0	0	6	6	6	22	22	22	42.207	0	24.069	8210700	10	1227500	937170	0	0	0	0	0	0	0	0	0	0	tr|A2RIH5|A2RIH5_LACLMAspCproteinOS=Lactococcuslactissubsp.cremoris(strainMG1363)GN=aspCPE=3SV=1	tr|A2RIH5|A2RIH5_LACLMAspCproteinOS=Lactococcuslactissubsp.cremoris(strainMG1363)GN=aspCPE=3SV=1
tr|A2RII5|A2RII5_LACLM	tr|A2RII5|A2RII5_LACLM	9	9	7	6	5	5	7	8	8	7	6	6	10	10	10	45.9	45.9	45.9	33.425	0	323.31	540010000	317	107250000	67898000	99925000	47616000	52064000	104970000	115150000	48256000	49172000	56767000	56324000	54266000	tr|A2RII5|A2RII5_LACLMUncharacterizedproteinOS=Lactococcuslactissubsp.cremoris(strainMG1363)GN=llmg_0476PE=4SV=1	tr|A2RII5|A2RII5_LACLMUncharacterizedproteinOS=Lactococcuslactissubsp.cremoris(strainMG1363)GN=llmg_0476PE=4SV=1
tr|A2RII7|A2RII7_LACLM	tr|A2RII7|A2RII7_LACLM	2	3	2	4	1	1	6	4	4	3	2	4	7	7	7	35.3	35.3	35.3	19.54	0	13.144	12401000	36	1419100	1828600	1905500	1679500	0	0	2301100	2132500	2599900	1863300	2129600	1503800	tr|A2RII7|A2RII7_LACLMNtdproteinOS=Lactococcuslactissubsp.cremoris(strainMG1363)GN=ntdPE=4SV=1	tr|A2RII7|A2RII7_LACLMNtdproteinOS=Lactococcuslactissubsp.cremoris(strainMG1363)GN=ntdPE=4SV=1
tr|A2RII8|A2RII8_LACLM	tr|A2RII8|A2RII8_LACLM	1	2	2	1	1	0	1	1	1	0	0	1	2	2	2	15.2	15.2	15.2	20.321	0	8.0167	2061100	17	0	717810	569990	0	0	0	0	0	0	0	0	0	tr|A2RII8|A2RII8_LACLMUncharacterizedproteinOS=Lactococcuslactissubsp.cremoris(strainMG1363)GN=llmg_0479PE=4SV=1	tr|A2RII8|A2RII8_LACLMUncharacterizedproteinOS=Lactococcuslactissubsp.cremoris(strainMG1363)GN=llmg_0479PE=4SV=1
tr|A2RII9|A2RII9_LACLM	tr|A2RII9|A2RII9_LACLM	6	5	8	7	5	6	6	5	6	6	3	5	9	9	9	52.5	52.5	52.5	25.551	0	58.272	116340000	121	9350400	12230000	6515400	5051600	6499100	4537200	4697900	3180900	2535500	7545300	2726900	3800800	tr|A2RII9|A2RII9_LACLMDukAproteinOS=Lactococcuslactissubsp.cremoris(strainMG1363)GN=dukAPE=4SV=1	tr|A2RII9|A2RII9_LACLMDukAproteinOS=Lactococcuslactissubsp.cremoris(strainMG1363)GN=dukAPE=4SV=1
tr|A2RIJ0|A2RIJ0_LACLM	tr|A2RIJ0|A2RIJ0_LACLM	4	6	3	3	3	3	2	2	4	2	2	2	6	6	6	26.2	26.2	26.2	38.617	0	96.032	127270000	75	24304000	17855000	18565000	7026200	5778000	8691900	7335400	10627000	7387700	6056400	4928700	5386600	tr|A2RIJ0|A2RIJ0_LACLMUncharacterizedproteinOS=Lactococcuslactissubsp.cremoris(strainMG1363)GN=llmg_0481PE=4SV=1	tr|A2RIJ0|A2RIJ0_LACLMUncharacterizedproteinOS=Lactococcuslactissubsp.cremoris(strainMG1363)GN=llmg_0481PE=4SV=1
tr|A2RIJ1|A2RIJ1_LACLM	tr|A2RIJ1|A2RIJ1_LACLM	13	18	13	11	10	12	10	12	11	9	10	8	18	18	18	72.3	72.3	72.3	43.451	0	323.31	1465100000	685	48576000	107450000	54485000	82206000	62897000	90064000	98448000	104660000	74750000	35602000	24794000	33743000	tr|A2RIJ1|A2RIJ1_LACLMUncharacterizedproteinOS=Lactococcuslactissubsp.cremoris(strainMG1363)GN=llmg_0482PE=4SV=1	tr|A2RIJ1|A2RIJ1_LACLMUncharacterizedproteinOS=Lactococcuslactissubsp.cremoris(strainMG1363)GN=llmg_0482PE=4SV=1
tr|A2RIJ2|A2RIJ2_LACLM	tr|A2RIJ2|A2RIJ2_LACLM	9	10	9	14	13	8	10	9	17	20	15	12	27	27	27	30.7	30.7	30.7	122.44	0	245.6	51751000	179	8618500	8958400	7681600	8211600	10728000	10202000	8966700	11375000	9415800	10647000	9972600	12350000	tr|A2RIJ2|A2RIJ2_LACLMDNA-directedDNApolymeraseOS=Lactococcuslactissubsp.cremoris(strainMG1363)GN=dnaEPE=4SV=1	tr|A2RIJ2|A2RIJ2_LACLMDNA-directedDNApolymeraseOS=Lactococcuslactissubsp.cremoris(strainMG1363)GN=dnaEPE=4SV=1
tr|A2RIJ3|A2RIJ3_LACLM	tr|A2RIJ3|A2RIJ3_LACLM	0	2	2	0	0	0	0	0	0	1	1	1	2	2	2	5.5	5.5	5.5	36.594	0.0067069	1.5686	6925100	4	0	1139700	746080	0	0	0	0	0	0	0	0	0	tr|A2RIJ3|A2RIJ3_LACLMUncharacterizedproteinOS=Lactococcuslactissubsp.cremoris(strainMG1363)GN=llmg_0484PE=4SV=1	tr|A2RIJ3|A2RIJ3_LACLMUncharacterizedproteinOS=Lactococcuslactissubsp.cremoris(strainMG1363)GN=llmg_0484PE=4SV=1
tr|A2RIJ7|A2RIJ7_LACLM	tr|A2RIJ7|A2RIJ7_LACLM	1	1	1	0	0	0	0	0	0	0	0	1	2	2	2	5.7	5.7	5.7	45.91	0	9.732	2575900	3	0	0	309510	0	0	0	0	0	0	0	0	0	tr|A2RIJ7|A2RIJ7_LACLMUncharacterizedproteinOS=Lactococcuslactissubsp.cremoris(strainMG1363)GN=llmg_0488PE=4SV=1	tr|A2RIJ7|A2RIJ7_LACLMUncharacterizedproteinOS=Lactococcuslactissubsp.cremoris(strainMG1363)GN=llmg_0488PE=4SV=1
tr|A2RIK1|A2RIK1_LACLM	tr|A2RIK1|A2RIK1_LACLM	17	15	14	14	13	13	14	14	15	12	10	14	19	19	19	85.6	85.6	85.6	30.82	0	323.31	1439800000	1115	233380000	161900000	107070000	179410000	200600000	460410000	228910000	139140000	172250000	140530000	142900000	122180000	tr|A2RIK1|A2RIK1_LACLMUncharacterizedproteinOS=Lactococcuslactissubsp.cremoris(strainMG1363)GN=llmg_0492PE=4SV=1	tr|A2RIK1|A2RIK1_LACLMUncharacterizedproteinOS=Lactococcuslactissubsp.cremoris(strainMG1363)GN=llmg_0492PE=4SV=1
tr|A2RIK2|A2RIK2_LACLM	tr|A2RIK2|A2RIK2_LACLM	4	5	6	4	4	3	2	2	3	3	3	2	8	8	8	31.9	31.9	31.9	30.734	0	103.36	640590000	71	11236000	8743900	11710000	8291300	7441400	5305800	8688600	12549000	10032000	15610000	9262000	13964000	tr|A2RIK2|A2RIK2_LACLMUncharacterizedproteinOS=Lactococcuslactissubsp.cremoris(strainMG1363)GN=llmg_0493PE=4SV=1	tr|A2RIK2|A2RIK2_LACLMUncharacterizedproteinOS=Lactococcuslactissubsp.cremoris(strainMG1363)GN=llmg_0493PE=4SV=1
tr|A2RIK3|A2RIK3_LACLM	tr|A2RIK3|A2RIK3_LACLM	4	5	5	4	3	3	1	1	1	5	5	2	9	9	9	29.1	29.1	29.1	43.711	0	8.7785	56893000	29	41763000	19283000	33949000	23677000	9197600	13902000	0	0	0	24912000	25616000	24343000	tr|A2RIK3|A2RIK3_LACLMBeta-N-acetylhexosaminidaseOS=Lactococcuslactissubsp.cremoris(strainMG1363)GN=nagZPE=4SV=1	tr|A2RIK3|A2RIK3_LACLMBeta-N-acetylhexosaminidaseOS=Lactococcuslactissubsp.cremoris(strainMG1363)GN=nagZPE=4SV=1
tr|A2RIK4|A2RIK4_LACLM	tr|A2RIK4|A2RIK4_LACLM	5	5	5	5	5	5	7	6	7	4	5	5	9	9	9	47.2	47.2	47.2	24.669	0	91.308	186800000	111	8581200	15924000	15844000	14514000	12425000	13603000	15008000	18181000	16403000	21346000	19726000	24375000	tr|A2RIK4|A2RIK4_LACLMUncharacterizedproteinOS=Lactococcuslactissubsp.cremoris(strainMG1363)GN=llmg_0495PE=4SV=1	tr|A2RIK4|A2RIK4_LACLMUncharacterizedproteinOS=Lactococcuslactissubsp.cremoris(strainMG1363)GN=llmg_0495PE=4SV=1
tr|A2RIK5|A2RIK5_LACLM	tr|A2RIK5|A2RIK5_LACLM	9	8	9	10	12	11	11	14	9	9	8	9	17	17	17	97.8	97.8	97.8	9.676	0	316.47	5625400000	2884	1293000000	799840000	1160300000	1236000000	692450000	1352000000	815500000	1138500000	1139000000	627060000	1260200000	808110000	tr|A2RIK5|A2RIK5_LACLMHllAproteinOS=Lactococcuslactissubsp.cremoris(strainMG1363)GN=hllAPE=3SV=1	tr|A2RIK5|A2RIK5_LACLMHllAproteinOS=Lactococcuslactissubsp.cremoris(strainMG1363)GN=hllAPE=3SV=1
tr|A2RIK6|A2RIK6_LACLM	tr|A2RIK6|A2RIK6_LACLM	3	4	4	4	1	1	5	3	2	2	4	2	6	6	6	50.3	50.3	50.3	19.017	0	31.207	65595000	41	6847000	4894700	6105000	23523000	0	0	32785000	12824000	36762000	17727000	23108000	18910000	tr|A2RIK6|A2RIK6_LACLMUncharacterizedproteinOS=Lactococcuslactissubsp.cremoris(strainMG1363)GN=llmg_0497PE=4SV=1	tr|A2RIK6|A2RIK6_LACLMUncharacterizedproteinOS=Lactococcuslactissubsp.cremoris(strainMG1363)GN=llmg_0497PE=4SV=1
tr|A2RIK7|A2RIK7_LACLM	tr|A2RIK7|A2RIK7_LACLM	3	4	2	4	3	2	3	2	2	1	3	2	6	6	6	45.6	45.6	45.6	19.027	0	103.88	3258000	29	468620	1016700	976490	934110	523030	1044300	1031000	1187800	1190900	0	1006000	939210	tr|A2RIK7|A2RIK7_LACLMOgtproteinOS=Lactococcuslactissubsp.cremoris(strainMG1363)GN=ogtPE=4SV=1	tr|A2RIK7|A2RIK7_LACLMOgtproteinOS=Lactococcuslactissubsp.cremoris(strainMG1363)GN=ogtPE=4SV=1
tr|A2RIL0|A2RIL0_LACLM	tr|A2RIL0|A2RIL0_LACLM	1	1	1	1	1	1	1	0	0	0	1	1	3	3	3	9.3	9.3	9.3	30.785	0.0013708	2.1942	42199000	12	0	0	0	0	0	0	2079900	0	0	0	0	0	tr|A2RIL0|A2RIL0_LACLMUncharacterizedproteinOS=Lactococcuslactissubsp.cremoris(strainMG1363)GN=llmg_0501PE=3SV=1	tr|A2RIL0|A2RIL0_LACLMUncharacterizedproteinOS=Lactococcuslactissubsp.cremoris(strainMG1363)GN=llmg_0501PE=3SV=1
tr|A2RIL2|A2RIL2_LACLM	tr|A2RIL2|A2RIL2_LACLM	5	4	4	0	2	1	4	4	3	1	2	1	6	6	6	36.2	36.2	36.2	18.054	0	18.242	66214000	20	2322800	1805400	2167200	0	3540500	0	2621800	3848800	2768700	0	2536400	0	tr|A2RIL2|A2RIL2_LACLMUncharacterizedproteinOS=Lactococcuslactissubsp.cremoris(strainMG1363)GN=llmg_0503PE=4SV=1	tr|A2RIL2|A2RIL2_LACLMUncharacterizedproteinOS=Lactococcuslactissubsp.cremoris(strainMG1363)GN=llmg_0503PE=4SV=1
tr|A2RIL4|A2RIL4_LACLM	tr|A2RIL4|A2RIL4_LACLM	12	15	12	11	12	11	12	12	12	9	10	8	21	21	21	61.2	61.2	61.2	41.752	0	223.67	570740000	233	64781000	63005000	81931000	66915000	62452000	41653000	54443000	62737000	63089000	67840000	53280000	68861000	tr|A2RIL4|A2RIL4_LACLMNifZproteinOS=Lactococcuslactissubsp.cremoris(strainMG1363)GN=nifZPE=4SV=1	tr|A2RIL4|A2RIL4_LACLMNifZproteinOS=Lactococcuslactissubsp.cremoris(strainMG1363)GN=nifZPE=4SV=1
tr|A2RIL6|A2RIL6_LACLM	tr|A2RIL6|A2RIL6_LACLM	26	27	21	19	13	18	23	22	18	10	13	9	36	36	35	66.1	66.1	66.1	59.823	0	323.31	1329700000	351	38813000	50475000	42400000	40714000	15134000	23508000	43541000	25008000	25089000	28780000	22075000	20683000	tr|A2RIL6|A2RIL6_LACLMUncharacterizedproteinOS=Lactococcuslactissubsp.cremoris(strainMG1363)GN=llmg_0507PE=4SV=1	tr|A2RIL6|A2RIL6_LACLMUncharacterizedproteinOS=Lactococcuslactissubsp.cremoris(strainMG1363)GN=llmg_0507PE=4SV=1
tr|A2RIL7|A2RIL7_LACLM	tr|A2RIL7|A2RIL7_LACLM	10	12	6	10	8	8	6	7	6	8	6	7	14	14	14	55.8	55.8	55.8	32.492	0	80.424	92777000	186	10972000	12373000	9324800	10115000	8782700	7472900	9246100	9897800	10346000	18287000	8272700	9363900	tr|A2RIL7|A2RIL7_LACLMCysteinesynthaseOS=Lactococcuslactissubsp.cremoris(strainMG1363)GN=llmg_0508PE=3SV=1	tr|A2RIL7|A2RIL7_LACLMCysteinesynthaseOS=Lactococcuslactissubsp.cremoris(strainMG1363)GN=llmg_0508PE=3SV=1
tr|A2RIL8|A2RIL8_LACLM	tr|A2RIL8|A2RIL8_LACLM	2	4	3	3	3	2	2	3	3	1	3	1	4	4	4	14.1	14.1	14.1	37.41	0	83.923	36660000	44	1047700	3073300	4130000	4362100	3116000	1645300	1998200	3870400	4540900	0	2416400	0	tr|A2RIL8|A2RIL8_LACLMAcmDproteinOS=Lactococcuslactissubsp.cremoris(strainMG1363)GN=acmDPE=4SV=1	tr|A2RIL8|A2RIL8_LACLMAcmDproteinOS=Lactococcuslactissubsp.cremoris(strainMG1363)GN=acmDPE=4SV=1
tr|A2RIL9|A2RIL9_LACLM	tr|A2RIL9|A2RIL9_LACLM	3	1	3	2	2	2	4	3	3	1	2	3	5	5	5	27.6	27.6	27.6	23.558	0	20.976	41836000	48	3481600	0	4001100	3448600	2404800	0	4340700	5052900	3764000	0	1598600	4984400	tr|A2RIL9|A2RIL9_LACLMUncharacterizedproteinOS=Lactococcuslactissubsp.cremoris(strainMG1363)GN=llmg_0510PE=4SV=1	tr|A2RIL9|A2RIL9_LACLMUncharacterizedproteinOS=Lactococcuslactissubsp.cremoris(strainMG1363)GN=llmg_0510PE=4SV=1
tr|A2RIM0|A2RIM0_LACLM	tr|A2RIM0|A2RIM0_LACLM	21	23	22	15	16	17	20	20	21	18	22	19	27	27	27	50.5	50.5	50.5	75.263	0	323.31	4282300000	523	112850000	86375000	98252000	55526000	80956000	70412000	83364000	72985000	66259000	110400000	77394000	90888000	tr|A2RIM0|A2RIM0_LACLMPonAproteinOS=Lactococcuslactissubsp.cremoris(strainMG1363)GN=ponAPE=4SV=1	tr|A2RIM0|A2RIM0_LACLMPonAproteinOS=Lactococcuslactissubsp.cremoris(strainMG1363)GN=ponAPE=4SV=1
tr|A2RIM3|A2RIM3_LACLM	tr|A2RIM3|A2RIM3_LACLM	6	6	6	4	6	6	4	4	4	5	6	5	8	8	8	69.2	69.2	69.2	15.399	0	110.37	419590000	279	40308000	31307000	79202000	19142000	40298000	59759000	45935000	47550000	32154000	29840000	38902000	17877000	tr|A2RIM3|A2RIM3_LACLMRegulatoryproteinSpxOS=Lactococcuslactissubsp.cremoris(strainMG1363)GN=spxAPE=3SV=1	tr|A2RIM3|A2RIM3_LACLMRegulatoryproteinSpxOS=Lactococcuslactissubsp.cremoris(strainMG1363)GN=spxAPE=3SV=1
tr|A2RIM5|A2RIM5_LACLM	tr|A2RIM5|A2RIM5_LACLM	5	3	4	4	5	6	4	5	3	4	4	5	8	8	8	34	34	34	28.868	0	81.473	34963000	93	1649800	3455200	5786600	3736200	2708100	5964000	5127800	4503100	3564400	5017800	4190700	4386400	tr|A2RIM5|A2RIM5_LACLMSuhBproteinOS=Lactococcuslactissubsp.cremoris(strainMG1363)GN=suhBPE=4SV=1	tr|A2RIM5|A2RIM5_LACLMSuhBproteinOS=Lactococcuslactissubsp.cremoris(strainMG1363)GN=suhBPE=4SV=1
tr|A2RIM6|A2RIM6_LACLM	tr|A2RIM6|A2RIM6_LACLM	14	16	15	11	12	14	11	12	10	11	11	9	20	20	20	57.7	57.7	57.7	45.731	0	323.31	2911800000	768	140310000	109040000	113710000	149190000	160750000	159590000	188640000	135720000	125630000	84660000	104400000	172100000	tr|A2RIM6|A2RIM6_LACLMUDP-N-acetylglucosamine1-carboxyvinyltransferaseOS=Lactococcuslactissubsp.cremoris(strainMG1363)GN=murAPE=3SV=1	tr|A2RIM6|A2RIM6_LACLMUDP-N-acetylglucosamine1-carboxyvinyltransferaseOS=Lactococcuslactissubsp.cremoris(strainMG1363)GN=murAPE=3SV=1
tr|A2RIM9|A2RIM9_LACLM	tr|A2RIM9|A2RIM9_LACLM	15	18	13	9	9	10	11	11	11	7	8	6	20	20	20	37.7	37.7	37.7	72.845	0	158.77	512670000	160	8622100	9781500	9007200	5419900	5669600	5427900	7329800	6910400	7444400	6482900	5642100	5078100	tr|A2RIM9|A2RIM9_LACLMDNAprimaseOS=Lactococcuslactissubsp.cremoris(strainMG1363)GN=dnaGPE=3SV=1	tr|A2RIM9|A2RIM9_LACLMDNAprimaseOS=Lactococcuslactissubsp.cremoris(strainMG1363)GN=dnaGPE=3SV=1
tr|A2RIN0|A2RIN0_LACLM	tr|A2RIN0|A2RIN0_LACLM	31	32	26	24	24	27	25	28	25	22	25	22	36	36	36	73.2	73.2	73.2	50.725	0	323.31	6900700000	1159	264340000	299340000	282100000	280770000	340070000	337000000	289530000	237080000	245510000	283080000	255880000	323600000	tr|A2RIN0|A2RIN0_LACLMRNApolymerasesigmafactorSigAOS=Lactococcuslactissubsp.cremoris(strainMG1363)GN=rpoDPE=3SV=1	tr|A2RIN0|A2RIN0_LACLMRNApolymerasesigmafactorSigAOS=Lactococcuslactissubsp.cremoris(strainMG1363)GN=rpoDPE=3SV=1
tr|A2RIN6|A2RIN6_LACLM	tr|A2RIN6|A2RIN6_LACLM	1	2	0	2	2	4	2	2	1	0	1	1	5	5	5	41.2	41.2	41.2	13.438	0	9.2326	13484000	16	0	0	0	0	9861900	4821900	4708200	6502000	0	0	0	0	tr|A2RIN6|A2RIN6_LACLMUncharacterizedproteinOS=Lactococcuslactissubsp.cremoris(strainMG1363)GN=llmg_0527PE=4SV=1	tr|A2RIN6|A2RIN6_LACLMUncharacterizedproteinOS=Lactococcuslactissubsp.cremoris(strainMG1363)GN=llmg_0527PE=4SV=1
tr|A2RIN8|A2RIN8_LACLM	tr|A2RIN8|A2RIN8_LACLM	3	5	0	3	3	2	3	3	2	3	3	2	5	5	5	34.6	34.6	34.6	17.421	0	32.646	18166000	66	2090800	2731900	0	3047100	6403300	7997100	5598700	4053000	3818100	5524600	3622300	2957600	tr|A2RIN8|A2RIN8_LACLMUncharacterizedproteinOS=Lactococcuslactissubsp.cremoris(strainMG1363)GN=llmg_0529PE=4SV=1	tr|A2RIN8|A2RIN8_LACLMUncharacterizedproteinOS=Lactococcuslactissubsp.cremoris(strainMG1363)GN=llmg_0529PE=4SV=1
tr|A2RIN9|A2RIN9_LACLM	tr|A2RIN9|A2RIN9_LACLM	10	10	7	5	7	7	8	7	8	8	5	6	15	12	12	54	48.7	48.7	36.042	0	50.134	1961400000	234	109070000	99495000	125350000	90713000	108070000	119370000	83568000	83847000	86936000	97049000	92107000	86473000	tr|A2RIN9|A2RIN9_LACLMGapAproteinOS=Lactococcuslactissubsp.cremoris(strainMG1363)GN=gapAPE=3SV=1	tr|A2RIN9|A2RIN9_LACLMGapAproteinOS=Lactococcuslactissubsp.cremoris(strainMG1363)GN=gapAPE=3SV=1
tr|A2RIP1|A2RIP1_LACLM	tr|A2RIP1|A2RIP1_LACLM	15	13	16	16	13	14	16	14	15	12	12	13	18	18	18	68.2	68.2	68.2	23.783	0	134.75	1981800000	1129	185840000	143450000	157270000	154160000	131980000	105170000	143220000	93587000	116260000	140840000	71597000	79760000	tr|A2RIP1|A2RIP1_LACLMPeptidedeformylaseOS=Lactococcuslactissubsp.cremoris(strainMG1363)GN=defPE=3SV=1	tr|A2RIP1|A2RIP1_LACLMPeptidedeformylaseOS=Lactococcuslactissubsp.cremoris(strainMG1363)GN=defPE=3SV=1
tr|A2RIP2|A2RIP2_LACLM	tr|A2RIP2|A2RIP2_LACLM	4	4	5	8	7	4	6	6	5	5	4	5	8	8	8	57	57	57	17.662	0	117.25	285920000	138	14578000	32441000	25137000	31275000	26384000	39668000	35003000	31331000	23812000	27268000	37719000	23990000	tr|A2RIP2|A2RIP2_LACLMNudHproteinOS=Lactococcuslactissubsp.cremoris(strainMG1363)GN=nudHPE=3SV=1	tr|A2RIP2|A2RIP2_LACLMNudHproteinOS=Lactococcuslactissubsp.cremoris(strainMG1363)GN=nudHPE=3SV=1
tr|A2RIP4|A2RIP4_LACLM	tr|A2RIP4|A2RIP4_LACLM	27	23	24	23	23	25	24	23	23	23	21	22	29	29	29	81	81	81	28.976	0	323.31	5221100000	2531	336790000	327280000	442740000	972180000	797450000	1410100000	1149100000	812930000	869540000	1175600000	947400000	909790000	tr|A2RIP4|A2RIP4_LACLMGltSproteinOS=Lactococcuslactissubsp.cremoris(strainMG1363)GN=gltSPE=4SV=1	tr|A2RIP4|A2RIP4_LACLMGltSproteinOS=Lactococcuslactissubsp.cremoris(strainMG1363)GN=gltSPE=4SV=1
tr|A2RIP5|A2RIP5_LACLM	tr|A2RIP5|A2RIP5_LACLM	5	7	5	11	10	9	10	11	9	8	9	7	13	13	13	46.6	46.6	46.6	41.359	0	185.93	551560000	263	43295000	53515000	31535000	206090000	139050000	206440000	201880000	150980000	161340000	112480000	147990000	107960000	tr|A2RIP5|A2RIP5_LACLMArgEproteinOS=Lactococcuslactissubsp.cremoris(strainMG1363)GN=argEPE=4SV=1	tr|A2RIP5|A2RIP5_LACLMArgEproteinOS=Lactococcuslactissubsp.cremoris(strainMG1363)GN=argEPE=4SV=1
tr|A2RIP6|A2RIP6_LACLM	tr|A2RIP6|A2RIP6_LACLM	12	12	12	13	13	12	13	14	11	10	10	11	16	16	16	57.6	57.6	57.6	16.81	0	239.51	2407100000	1374	373670000	355660000	264350000	397250000	310710000	407370000	408640000	338120000	228550000	122510000	411990000	336580000	tr|A2RIP6|A2RIP6_LACLM3-hydroxyacyl-[acyl-carrier-protein]dehydrataseFabZOS=Lactococcuslactissubsp.cremoris(strainMG1363)GN=fabZPE=3SV=1	tr|A2RIP6|A2RIP6_LACLM3-hydroxyacyl-[acyl-carrier-protein]dehydrataseFabZOS=Lactococcuslactissubsp.cremoris(strainMG1363)GN=fabZPE=3SV=1
tr|A2RIP7|A2RIP7_LACLM	tr|A2RIP7|A2RIP7_LACLM	19	17	20	16	16	15	16	16	16	13	15	14	22	22	22	76	76	76	26.396	0	323.31	5498800000	2580	603990000	574590000	775990000	774030000	470350000	681220000	946500000	738380000	536340000	741610000	655760000	527600000	tr|A2RIP7|A2RIP7_LACLMEnoyl-[acyl-carrier-protein]reductase[NADH]OS=Lactococcuslactissubsp.cremoris(strainMG1363)GN=fabIPE=3SV=1	tr|A2RIP7|A2RIP7_LACLMEnoyl-[acyl-carrier-protein]reductase[NADH]OS=Lactococcuslactissubsp.cremoris(strainMG1363)GN=fabIPE=3SV=1
tr|A2RIP8|A2RIP8_LACLM	tr|A2RIP8|A2RIP8_LACLM	10	12	9	10	13	11	9	9	10	12	11	12	16	16	16	30.6	30.6	30.6	35.502	0	259.21	1490000000	1497	150200000	99007000	110590000	103490000	95835000	102090000	67067000	82759000	72674000	100620000	103870000	100840000	tr|A2RIP8|A2RIP8_LACLMMembraneproteininsertaseYidCOS=Lactococcuslactissubsp.cremoris(strainMG1363)GN=yidCPE=3SV=1	tr|A2RIP8|A2RIP8_LACLMMembraneproteininsertaseYidCOS=Lactococcuslactissubsp.cremoris(strainMG1363)GN=yidCPE=3SV=1
tr|A2RIP9|A2RIP9_LACLM	tr|A2RIP9|A2RIP9_LACLM	12	10	11	13	9	12	11	11	10	9	9	12	14	14	14	66.3	66.3	66.3	28.276	0	323.31	3761700000	995	248430000	240090000	373890000	256570000	147450000	204860000	305410000	207110000	151010000	134430000	203680000	170320000	tr|A2RIP9|A2RIP9_LACLMPgmAproteinOS=Lactococcuslactissubsp.cremoris(strainMG1363)GN=pgmAPE=1SV=1	tr|A2RIP9|A2RIP9_LACLMPgmAproteinOS=Lactococcuslactissubsp.cremoris(strainMG1363)GN=pgmAPE=1SV=1
tr|A2RIQ1|A2RIQ1_LACLM	tr|A2RIQ1|A2RIQ1_LACLM	9	9	8	8	6	4	8	7	8	6	6	7	11	11	11	73.6	73.6	73.6	19.474	0	169.64	314890000	288	60796000	30096000	22715000	41576000	44450000	58188000	61846000	42552000	49302000	39665000	29857000	40165000	tr|A2RIQ1|A2RIQ1_LACLMDfpAproteinOS=Lactococcuslactissubsp.cremoris(strainMG1363)GN=dfpAPE=4SV=1	tr|A2RIQ1|A2RIQ1_LACLMDfpAproteinOS=Lactococcuslactissubsp.cremoris(strainMG1363)GN=dfpAPE=4SV=1
tr|A2RIQ2|A2RIQ2_LACLM	tr|A2RIQ2|A2RIQ2_LACLM	7	6	4	6	5	6	5	5	4	5	5	5	9	9	9	34.2	34.2	34.2	25.625	0	159.02	280870000	130	20779000	24717000	15761000	7279500	18246000	14312000	3701200	12161000	10895000	12953000	11996000	11467000	tr|A2RIQ2|A2RIQ2_LACLMDfpBproteinOS=Lactococcuslactissubsp.cremoris(strainMG1363)GN=dfpBPE=4SV=1	tr|A2RIQ2|A2RIQ2_LACLMDfpBproteinOS=Lactococcuslactissubsp.cremoris(strainMG1363)GN=dfpBPE=4SV=1
tr|A2RIQ4|A2RIQ4_LACLM	tr|A2RIQ4|A2RIQ4_LACLM	10	9	7	8	8	9	10	10	10	14	12	11	19	19	19	28.9	28.9	28.9	85.648	0	224.87	156740000	327	16710000	14080000	10405000	12078000	14963000	14470000	6451900	16133000	10615000	13416000	13310000	18770000	tr|A2RIQ4|A2RIQ4_LACLMCtpEproteinOS=Lactococcuslactissubsp.cremoris(strainMG1363)GN=ctpEPE=3SV=1	tr|A2RIQ4|A2RIQ4_LACLMCtpEproteinOS=Lactococcuslactissubsp.cremoris(strainMG1363)GN=ctpEPE=3SV=1
tr|A2RIQ8|A2RIQ8_LACLM	tr|A2RIQ8|A2RIQ8_LACLM	3	2	1	3	2	2	4	4	4	3	3	5	6	6	6	31.8	31.8	31.8	22.267	0	118.62	21680000	59	1619600	1717600	0	2389400	1816400	1516000	2211100	3275800	3732700	3173900	1689000	5203200	tr|A2RIQ8|A2RIQ8_LACLMUncharacterizedproteinOS=Lactococcuslactissubsp.cremoris(strainMG1363)GN=llmg_0551PE=4SV=1	tr|A2RIQ8|A2RIQ8_LACLMUncharacterizedproteinOS=Lactococcuslactissubsp.cremoris(strainMG1363)GN=llmg_0551PE=4SV=1
tr|A2RIQ9|A2RIQ9_LACLM	tr|A2RIQ9|A2RIQ9_LACLM	5	2	4	1	4	5	5	4	4	4	4	4	7	7	7	65.3	65.3	65.3	13.412	0	238.38	47187000	79	19814000	13334000	11828000	0	8536700	18047000	10605000	15163000	6986500	9550200	5901600	10944000	tr|A2RIQ9|A2RIQ9_LACLMUncharacterizedproteinOS=Lactococcuslactissubsp.cremoris(strainMG1363)GN=llmg_0552PE=4SV=1	tr|A2RIQ9|A2RIQ9_LACLMUncharacterizedproteinOS=Lactococcuslactissubsp.cremoris(strainMG1363)GN=llmg_0552PE=4SV=1
tr|A2RIR0|A2RIR0_LACLM	tr|A2RIR0|A2RIR0_LACLM	5	3	5	5	5	4	5	5	5	5	5	5	5	5	5	51.1	51.1	51.1	10.942	0	133.06	102850000	220	20963000	36758000	13772000	13439000	13715000	16270000	10381000	12600000	27057000	18236000	22331000	18243000	tr|A2RIR0|A2RIR0_LACLMUncharacterizedproteinOS=Lactococcuslactissubsp.cremoris(strainMG1363)GN=llmg_0553PE=4SV=1	tr|A2RIR0|A2RIR0_LACLMUncharacterizedproteinOS=Lactococcuslactissubsp.cremoris(strainMG1363)GN=llmg_0553PE=4SV=1
tr|A2RIR2|A2RIR2_LACLM	tr|A2RIR2|A2RIR2_LACLM	7	8	5	4	3	4	5	5	4	3	2	3	8	8	8	42.9	42.9	42.9	21.412	0	17.94	82362000	115	15263000	20566000	15126000	6878100	5019800	23569000	4589400	6857300	5106800	8224000	14222000	10793000	tr|A2RIR2|A2RIR2_LACLMThymidinekinaseOS=Lactococcuslactissubsp.cremoris(strainMG1363)GN=tdkPE=3SV=1	tr|A2RIR2|A2RIR2_LACLMThymidinekinaseOS=Lactococcuslactissubsp.cremoris(strainMG1363)GN=tdkPE=3SV=1
tr|A2RIR3|A2RIR3_LACLM	tr|A2RIR3|A2RIR3_LACLM	6	6	7	7	5	4	5	6	5	4	5	5	8	8	8	45.6	45.6	45.6	17.484	0	248.26	762220000	237	72956000	54059000	52697000	29343000	35424000	45588000	42362000	36022000	40319000	39054000	45809000	33489000	tr|A2RIR3|A2RIR3_LACLMUncharacterizedproteinOS=Lactococcuslactissubsp.cremoris(strainMG1363)GN=llmg_0556PE=4SV=1	tr|A2RIR3|A2RIR3_LACLMUncharacterizedproteinOS=Lactococcuslactissubsp.cremoris(strainMG1363)GN=llmg_0556PE=4SV=1
tr|A2RIR5|A2RIR5_LACLM	tr|A2RIR5|A2RIR5_LACLM	3	6	6	2	2	2	3	3	3	1	3	3	7	7	7	36	36	36	20.313	0	180.71	32737000	101	5684400	7097800	4607100	4825400	3331200	4840300	5239500	3906800	3757800	1837400	2230000	2768400	tr|A2RIR5|A2RIR5_LACLMUncharacterizedproteinOS=Lactococcuslactissubsp.cremoris(strainMG1363)GN=llmg_0558PE=4SV=1	tr|A2RIR5|A2RIR5_LACLMUncharacterizedproteinOS=Lactococcuslactissubsp.cremoris(strainMG1363)GN=llmg_0558PE=4SV=1
tr|A2RIR6|A2RIR6_LACLM	tr|A2RIR6|A2RIR6_LACLM	5	2	3	5	3	4	4	4	2	2	2	3	8	8	8	34.7	34.7	34.7	28.107	0	78.253	73858000	43	5951800	5293700	5750600	1408500	4851500	2183100	2746800	2599200	6061900	2573300	6447700	9055800	tr|A2RIR6|A2RIR6_LACLMUncharacterizedproteinOS=Lactococcuslactissubsp.cremoris(strainMG1363)GN=llmg_0559PE=4SV=1	tr|A2RIR6|A2RIR6_LACLMUncharacterizedproteinOS=Lactococcuslactissubsp.cremoris(strainMG1363)GN=llmg_0559PE=4SV=1
tr|A2RIR7|A2RIR7_LACLM	tr|A2RIR7|A2RIR7_LACLM	6	8	4	5	4	4	4	3	3	2	5	3	10	10	10	37.8	37.8	37.8	31.156	0	178.14	47435000	87	6282900	4648200	12404000	7759000	5736200	10611000	9622000	5852300	5736400	3881900	3208600	4986600	tr|A2RIR7|A2RIR7_LACLMReleasefactorglutaminemethyltransferaseOS=Lactococcuslactissubsp.cremoris(strainMG1363)GN=hemKPE=3SV=1	tr|A2RIR7|A2RIR7_LACLMReleasefactorglutaminemethyltransferaseOS=Lactococcuslactissubsp.cremoris(strainMG1363)GN=hemKPE=3SV=1
tr|A2RIR9|A2RIR9_LACLM	tr|A2RIR9|A2RIR9_LACLM	11	13	9	9	6	8	9	9	10	4	7	5	15	15	15	51.6	51.6	51.6	33.99	0	263	299500000	201	33914000	32180000	46031000	28600000	18137000	45718000	31515000	31595000	24947000	15389000	28048000	26302000	tr|A2RIR9|A2RIR9_LACLMUncharacterizedproteinOS=Lactococcuslactissubsp.cremoris(strainMG1363)GN=llmg_0562PE=4SV=1	tr|A2RIR9|A2RIR9_LACLMUncharacterizedproteinOS=Lactococcuslactissubsp.cremoris(strainMG1363)GN=llmg_0562PE=4SV=1
tr|A2RIS1|A2RIS1_LACLM	tr|A2RIS1|A2RIS1_LACLM	9	8	7	7	5	5	10	8	10	4	4	7	13	13	13	75.5	75.5	75.5	22.45	0	137.81	346790000	191	14885000	14533000	18061000	20188000	14233000	22370000	10705000	15266000	17009000	29462000	33745000	33868000	tr|A2RIS1|A2RIS1_LACLMUncharacterizedproteinOS=Lactococcuslactissubsp.cremoris(strainMG1363)GN=llmg_0564PE=4SV=1	tr|A2RIS1|A2RIS1_LACLMUncharacterizedproteinOS=Lactococcuslactissubsp.cremoris(strainMG1363)GN=llmg_0564PE=4SV=1
tr|A2RIS3|A2RIS3_LACLM	tr|A2RIS3|A2RIS3_LACLM	12	15	10	13	14	12	9	10	10	7	12	10	18	18	18	50.5	50.5	50.5	43.913	0	102.32	71850000	107	5713200	6476000	6437600	5390700	6670000	7236100	5409400	6494600	6292300	6310200	5302400	7386200	tr|A2RIS3|A2RIS3_LACLMSerAproteinOS=Lactococcuslactissubsp.cremoris(strainMG1363)GN=serAPE=3SV=1	tr|A2RIS3|A2RIS3_LACLMSerAproteinOS=Lactococcuslactissubsp.cremoris(strainMG1363)GN=serAPE=3SV=1
tr|A2RIS4|A2RIS4_LACLM	tr|A2RIS4|A2RIS4_LACLM	0	0	0	1	1	0	2	3	2	0	0	1	3	3	3	18.2	18.2	18.2	24.035	0	16.192	4523000	7	0	0	0	0	0	0	0	2396800	2604700	0	0	0	tr|A2RIS4|A2RIS4_LACLMSerBproteinOS=Lactococcuslactissubsp.cremoris(strainMG1363)GN=serBPE=4SV=1	tr|A2RIS4|A2RIS4_LACLMSerBproteinOS=Lactococcuslactissubsp.cremoris(strainMG1363)GN=serBPE=4SV=1
tr|A2RIS6|A2RIS6_LACLM	tr|A2RIS6|A2RIS6_LACLM	6	6	6	6	6	5	6	6	6	6	6	6	6	6	6	32.5	32.5	32.5	27.206	0	152.04	188910000	175	41601000	43862000	30028000	17085000	41758000	38432000	22015000	22499000	34058000	15037000	24729000	23278000	tr|A2RIS6|A2RIS6_LACLMSpoUproteinOS=Lactococcuslactissubsp.cremoris(strainMG1363)GN=spoUPE=4SV=1	tr|A2RIS6|A2RIS6_LACLMSpoUproteinOS=Lactococcuslactissubsp.cremoris(strainMG1363)GN=spoUPE=4SV=1
tr|A2RIS8|A2RIS8_LACLM	tr|A2RIS8|A2RIS8_LACLM	0	0	0	1	0	1	0	0	1	0	0	0	2	2	2	23.5	23.5	23.5	13.711	0.0033807	1.8053	889980	3	0	0	0	0	0	73724	0	0	0	0	0	0	tr|A2RIS8|A2RIS8_LACLMUncharacterizedproteinOS=Lactococcuslactissubsp.cremoris(strainMG1363)GN=llmg_0572PE=4SV=1	tr|A2RIS8|A2RIS8_LACLMUncharacterizedproteinOS=Lactococcuslactissubsp.cremoris(strainMG1363)GN=llmg_0572PE=4SV=1
tr|A2RIT0|A2RIT0_LACLM	tr|A2RIT0|A2RIT0_LACLM	2	1	1	1	1	1	1	1	1	1	1	1	2	2	2	21.1	21.1	21.1	16.063	0	51.768	2114800000	117	450780000	234050000	362250000	315310000	242290000	225590000	683340000	494630000	406890000	299310000	309110000	128410000	tr|A2RIT0|A2RIT0_LACLMFldproteinOS=Lactococcuslactissubsp.cremoris(strainMG1363)GN=fldPE=4SV=1	tr|A2RIT0|A2RIT0_LACLMFldproteinOS=Lactococcuslactissubsp.cremoris(strainMG1363)GN=fldPE=4SV=1
tr|A2RIT1|A2RIT1_LACLM	tr|A2RIT1|A2RIT1_LACLM	4	4	4	2	3	1	4	4	3	3	4	6	7	7	7	38.8	38.8	38.8	24.339	0	67.269	35329000	47	2384600	5025000	3249200	2091000	1543700	0	1624000	2596100	2679500	3403800	4151900	4389000	tr|A2RIT1|A2RIT1_LACLMUncharacterizedproteinOS=Lactococcuslactissubsp.cremoris(strainMG1363)GN=llmg_0576PE=4SV=1	tr|A2RIT1|A2RIT1_LACLMUncharacterizedproteinOS=Lactococcuslactissubsp.cremoris(strainMG1363)GN=llmg_0576PE=4SV=1
tr|A2RIT2|A2RIT2_LACLM	tr|A2RIT2|A2RIT2_LACLM	6	8	6	9	10	10	9	9	9	9	9	9	13	13	13	63.7	63.7	63.7	31.799	0	171.69	979560000	538	45817000	52345000	85951000	111200000	167550000	192520000	138640000	111850000	139280000	114030000	136190000	138510000	tr|A2RIT2|A2RIT2_LACLMMethionineaminopeptidaseOS=Lactococcuslactissubsp.cremoris(strainMG1363)GN=pepMPE=3SV=1	tr|A2RIT2|A2RIT2_LACLMMethionineaminopeptidaseOS=Lactococcuslactissubsp.cremoris(strainMG1363)GN=pepMPE=3SV=1
tr|A2RIT3|A2RIT3_LACLM	tr|A2RIT3|A2RIT3_LACLM	0	1	0	1	1	1	2	2	2	1	1	1	2	2	2	8	8	8	34.333	0	5.614	1683300	18	0	0	0	0	0	0	0	0	613590	0	0	0	tr|A2RIT3|A2RIT3_LACLMUncharacterizedproteinOS=Lactococcuslactissubsp.cremoris(strainMG1363)GN=llmg_0578PE=4SV=1	tr|A2RIT3|A2RIT3_LACLMUncharacterizedproteinOS=Lactococcuslactissubsp.cremoris(strainMG1363)GN=llmg_0578PE=4SV=1
tr|A2RIT4|A2RIT4_LACLM	tr|A2RIT4|A2RIT4_LACLM	1	1	1	1	1	1	1	1	2	0	1	1	2	2	2	11.5	11.5	11.5	17.218	0	2.9617	5764100	12	0	0	0	0	0	0	0	0	2017300	0	0	0	tr|A2RIT4|A2RIT4_LACLMUncharacterizedproteinOS=Lactococcuslactissubsp.cremoris(strainMG1363)GN=llmg_0579PE=4SV=1	tr|A2RIT4|A2RIT4_LACLMUncharacterizedproteinOS=Lactococcuslactissubsp.cremoris(strainMG1363)GN=llmg_0579PE=4SV=1
tr|A2RIT8|A2RIT8_LACLM	tr|A2RIT8|A2RIT8_LACLM	6	6	5	4	5	4	6	5	5	4	3	4	8	8	8	61.2	61.2	61.2	14.832	0	113.16	1397700000	137	237950000	149280000	246930000	100530000	115740000	195870000	185470000	126940000	155140000	228210000	235280000	252540000	tr|A2RIT8|A2RIT8_LACLMUncharacterizedproteinOS=Lactococcuslactissubsp.cremoris(strainMG1363)GN=llmg_0584PE=4SV=1	tr|A2RIT8|A2RIT8_LACLMUncharacterizedproteinOS=Lactococcuslactissubsp.cremoris(strainMG1363)GN=llmg_0584PE=4SV=1
tr|A2RIT9|A2RIT9_LACLM	tr|A2RIT9|A2RIT9_LACLM	19	15	19	10	10	8	6	7	7	6	5	5	22	22	22	82.3	82.3	82.3	20.577	0	323.31	835260000	313	84299000	58882000	76703000	13299000	17928000	16485000	10898000	9798000	11109000	14682000	9078100	10267000	tr|A2RIT9|A2RIT9_LACLMUncharacterizedproteinOS=Lactococcuslactissubsp.cremoris(strainMG1363)GN=llmg_0585PE=4SV=1	tr|A2RIT9|A2RIT9_LACLMUncharacterizedproteinOS=Lactococcuslactissubsp.cremoris(strainMG1363)GN=llmg_0585PE=4SV=1
tr|A2RIU5|A2RIU5_LACLM	tr|A2RIU5|A2RIU5_LACLM	12	9	11	9	9	9	12	12	12	10	9	12	15	15	15	64.9	64.9	64.9	25.754	0	323.31	981240000	440	64104000	65919000	83810000	78319000	63565000	96778000	53075000	99559000	108190000	102230000	89943000	118750000	tr|A2RIU5|A2RIU5_LACLMUncharacterizedproteinOS=Lactococcuslactissubsp.cremoris(strainMG1363)GN=llmg_0592PE=4SV=1	tr|A2RIU5|A2RIU5_LACLMUncharacterizedproteinOS=Lactococcuslactissubsp.cremoris(strainMG1363)GN=llmg_0592PE=4SV=1
tr|A2RIU6|A2RIU6_LACLM	tr|A2RIU6|A2RIU6_LACLM	29	24	25	23	24	24	21	22	23	21	22	20	31	31	31	69.7	69.7	69.7	33.286	0	323.31	3061200000	1924	382870000	462120000	288170000	197030000	196880000	293670000	282920000	206460000	222740000	232940000	240690000	358740000	tr|A2RIU6|A2RIU6_LACLMUncharacterizedproteinOS=Lactococcuslactissubsp.cremoris(strainMG1363)GN=llmg_0593PE=4SV=1	tr|A2RIU6|A2RIU6_LACLMUncharacterizedproteinOS=Lactococcuslactissubsp.cremoris(strainMG1363)GN=llmg_0593PE=4SV=1
tr|A2RIV2|A2RIV2_LACLM	tr|A2RIV2|A2RIV2_LACLM	7	7	7	2	6	7	5	7	5	5	4	7	9	9	9	17.8	17.8	17.8	61.922	0	98.784	320990000	408	41049000	50507000	31085000	11467000	17900000	21749000	15963000	28016000	22944000	21729000	25105000	29103000	tr|A2RIV2|A2RIV2_LACLMUncharacterizedproteinOS=Lactococcuslactissubsp.cremoris(strainMG1363)GN=llmg_0599PE=4SV=1	tr|A2RIV2|A2RIV2_LACLMUncharacterizedproteinOS=Lactococcuslactissubsp.cremoris(strainMG1363)GN=llmg_0599PE=4SV=1
tr|A2RIV3|A2RIV3_LACLM	tr|A2RIV3|A2RIV3_LACLM	6	6	4	6	6	6	6	5	6	8	8	8	9	9	9	34	34	34	35.539	0	148.54	138910000	202	11558000	23627000	21470000	8051200	24527000	12227000	12060000	15097000	21765000	37423000	27209000	39329000	tr|A2RIV3|A2RIV3_LACLMUncharacterizedproteinOS=Lactococcuslactissubsp.cremoris(strainMG1363)GN=llmg_0600PE=4SV=1	tr|A2RIV3|A2RIV3_LACLMUncharacterizedproteinOS=Lactococcuslactissubsp.cremoris(strainMG1363)GN=llmg_0600PE=4SV=1
tr|A2RIV4|A2RIV4_LACLM	tr|A2RIV4|A2RIV4_LACLM	1	1	0	0	0	1	0	0	0	0	0	1	2	2	2	20.2	20.2	20.2	17.104	0	3.0172	4823900	6	1019400	0	0	0	0	0	0	0	0	0	0	0	tr|A2RIV4|A2RIV4_LACLMUncharacterizedproteinOS=Lactococcuslactissubsp.cremoris(strainMG1363)GN=llmg_0601PE=4SV=1	tr|A2RIV4|A2RIV4_LACLMUncharacterizedproteinOS=Lactococcuslactissubsp.cremoris(strainMG1363)GN=llmg_0601PE=4SV=1
tr|A2RIV5|A2RIV5_LACLM	tr|A2RIV5|A2RIV5_LACLM	6	3	6	5	7	7	9	7	8	8	7	5	10	10	10	69.4	69.4	69.4	13.771	0	58.259	178380000	344	23768000	17324000	21757000	27402000	39403000	64581000	42454000	48354000	36790000	55376000	44426000	39012000	tr|A2RIV5|A2RIV5_LACLMUncharacterizedproteinOS=Lactococcuslactissubsp.cremoris(strainMG1363)GN=llmg_0602PE=4SV=1	tr|A2RIV5|A2RIV5_LACLMUncharacterizedproteinOS=Lactococcuslactissubsp.cremoris(strainMG1363)GN=llmg_0602PE=4SV=1
tr|A2RIV8|A2RIV8_LACLM	tr|A2RIV8|A2RIV8_LACLM	6	5	4	8	3	8	8	8	7	7	5	8	13	13	13	71.9	71.9	71.9	27.946	0	114.96	70043000	81	5624700	4368400	2975200	7263500	4976300	12414000	14555000	7978200	8826100	12178000	8288300	9939300	tr|A2RIV8|A2RIV8_LACLMUncharacterizedproteinOS=Lactococcuslactissubsp.cremoris(strainMG1363)GN=llmg_0605PE=3SV=1	tr|A2RIV8|A2RIV8_LACLMUncharacterizedproteinOS=Lactococcuslactissubsp.cremoris(strainMG1363)GN=llmg_0605PE=3SV=1
tr|A2RIV9|A2RIV9_LACLM	tr|A2RIV9|A2RIV9_LACLM	16	20	14	15	13	13	14	14	13	10	14	10	22	22	22	37.2	37.2	37.2	83.838	0	269.94	1192100000	286	53178000	54280000	57446000	98588000	66035000	56501000	93689000	73680000	75370000	90530000	77237000	65814000	tr|A2RIV9|A2RIV9_LACLMRecJproteinOS=Lactococcuslactissubsp.cremoris(strainMG1363)GN=recJPE=4SV=1	tr|A2RIV9|A2RIV9_LACLMRecJproteinOS=Lactococcuslactissubsp.cremoris(strainMG1363)GN=recJPE=4SV=1
tr|A2RIW2|A2RIW2_LACLM	tr|A2RIW2|A2RIW2_LACLM	29	31	28	25	23	25	28	26	27	26	28	24	35	35	35	80	80	80	60.845	0	323.31	7699900000	1007	179640000	189420000	190500000	127310000	195690000	152670000	213200000	191860000	179880000	251890000	209720000	182170000	tr|A2RIW2|A2RIW2_LACLMPabCproteinOS=Lactococcuslactissubsp.cremoris(strainMG1363)GN=pabCPE=4SV=1	tr|A2RIW2|A2RIW2_LACLMPabCproteinOS=Lactococcuslactissubsp.cremoris(strainMG1363)GN=pabCPE=4SV=1
tr|A2RIW8|A2RIW8_LACLM	tr|A2RIW8|A2RIW8_LACLM	3	5	4	9	6	6	8	8	5	4	5	5	10	10	10	70.9	70.9	70.9	17.05	0	99.588	138210000	124	25567000	17257000	27301000	19859000	9340000	15445000	21523000	19833000	19431000	13493000	15231000	6937800	tr|A2RIW8|A2RIW8_LACLMCtsRproteinOS=Lactococcuslactissubsp.cremoris(strainMG1363)GN=ctsRPE=4SV=1	tr|A2RIW8|A2RIW8_LACLMCtsRproteinOS=Lactococcuslactissubsp.cremoris(strainMG1363)GN=ctsRPE=4SV=1
tr|A2RIW9|A2RIW9_LACLM	tr|A2RIW9|A2RIW9_LACLM	47	46	36	42	39	32	41	38	35	28	35	32	58	58	58	67.4	67.4	67.4	90.362	0	323.31	10876000000	2112	379440000	348850000	305020000	640350000	658910000	504010000	581350000	497890000	305040000	408060000	422360000	501710000	tr|A2RIW9|A2RIW9_LACLMClpCproteinOS=Lactococcuslactissubsp.cremoris(strainMG1363)GN=clpCPE=3SV=1	tr|A2RIW9|A2RIW9_LACLMClpCproteinOS=Lactococcuslactissubsp.cremoris(strainMG1363)GN=clpCPE=3SV=1
tr|A2RIX0|A2RIX0_LACLM	tr|A2RIX0|A2RIX0_LACLM	9	7	8	7	7	9	8	7	7	5	6	7	10	10	10	55.1	55.1	55.1	21.314	0	181.52	1773700000	631	168180000	139050000	238680000	93317000	96980000	116780000	141820000	112530000	123600000	87528000	74581000	88417000	tr|A2RIX0|A2RIX0_LACLMYfiAproteinOS=Lactococcuslactissubsp.cremoris(strainMG1363)GN=yfiAPE=4SV=1	tr|A2RIX0|A2RIX0_LACLMYfiAproteinOS=Lactococcuslactissubsp.cremoris(strainMG1363)GN=yfiAPE=4SV=1
tr|A2RIX3|A2RIX3_LACLM	tr|A2RIX3|A2RIX3_LACLM	2	1	1	0	0	0	1	1	1	0	0	0	2	2	2	20.5	20.5	20.5	23.012	0	24.235	90756000	13	0	0	0	0	0	0	481960	511900	430880	0	0	0	tr|A2RIX3|A2RIX3_LACLMUncharacterizedproteinOS=Lactococcuslactissubsp.cremoris(strainMG1363)GN=llmg_0619PE=4SV=1	tr|A2RIX3|A2RIX3_LACLMUncharacterizedproteinOS=Lactococcuslactissubsp.cremoris(strainMG1363)GN=llmg_0619PE=4SV=1
tr|A2RIX8|A2RIX8_LACLM	tr|A2RIX8|A2RIX8_LACLM	2	1	1	1	0	1	1	1	1	1	0	1	2	2	2	12.1	12.1	12.1	24.647	0	44.052	6095600	24	0	0	0	1518300	0	0	0	2827100	0	2442500	0	0	tr|A2RIX8|A2RIX8_LACLMUncharacterizedproteinOS=Lactococcuslactissubsp.cremoris(strainMG1363)GN=llmg_0624PE=3SV=1	tr|A2RIX8|A2RIX8_LACLMUncharacterizedproteinOS=Lactococcuslactissubsp.cremoris(strainMG1363)GN=llmg_0624PE=3SV=1
tr|A2RIX9|A2RIX9_LACLM	tr|A2RIX9|A2RIX9_LACLM	3	2	2	0	2	2	1	1	1	3	2	3	4	4	4	14.8	14.8	14.8	38.909	0	38.363	4675700	22	873200	620670	1189300	0	641620	300560	0	0	0	959360	485890	740220	tr|A2RIX9|A2RIX9_LACLMUncharacterizedproteinOS=Lactococcuslactissubsp.cremoris(strainMG1363)GN=llmg_0625PE=4SV=1	tr|A2RIX9|A2RIX9_LACLMUncharacterizedproteinOS=Lactococcuslactissubsp.cremoris(strainMG1363)GN=llmg_0625PE=4SV=1
tr|A2RIY0|A2RIY0_LACLM	tr|A2RIY0|A2RIY0_LACLM	1	1	1	1	1	0	4	4	4	0	1	4	5	5	5	22.8	22.8	22.8	22.918	0	40.738	8628100	25	0	0	0	0	0	0	1890500	1492700	1658300	0	0	1569100	tr|A2RIY0|A2RIY0_LACLMUncharacterizedproteinOS=Lactococcuslactissubsp.cremoris(strainMG1363)GN=llmg_0626PE=4SV=1	tr|A2RIY0|A2RIY0_LACLMUncharacterizedproteinOS=Lactococcuslactissubsp.cremoris(strainMG1363)GN=llmg_0626PE=4SV=1
tr|A2RIY1|A2RIY1_LACLM	tr|A2RIY1|A2RIY1_LACLM	13	14	7	9	6	3	9	10	12	5	11	4	17	17	17	43.2	43.2	43.2	57.573	0	84.499	528830000	196	28115000	30273000	29039000	22778000	35577000	34973000	24799000	22480000	31077000	26832000	26194000	22398000	tr|A2RIY1|A2RIY1_LACLMFadDproteinOS=Lactococcuslactissubsp.cremoris(strainMG1363)GN=fadDPE=4SV=1	tr|A2RIY1|A2RIY1_LACLMFadDproteinOS=Lactococcuslactissubsp.cremoris(strainMG1363)GN=fadDPE=4SV=1
tr|A2RIY2|A2RIY2_LACLM	tr|A2RIY2|A2RIY2_LACLM	1	3	1	1	0	1	4	3	0	1	0	1	5	5	5	14.1	14.1	14.1	36.138	0	11.27	7918500	17	0	1170000	0	0	0	0	1349800	1828600	0	0	0	0	tr|A2RIY2|A2RIY2_LACLMUncharacterizedproteinOS=Lactococcuslactissubsp.cremoris(strainMG1363)GN=llmg_0628PE=4SV=1	tr|A2RIY2|A2RIY2_LACLMUncharacterizedproteinOS=Lactococcuslactissubsp.cremoris(strainMG1363)GN=llmg_0628PE=4SV=1
tr|A2RIY4|A2RIY4_LACLM	tr|A2RIY4|A2RIY4_LACLM	6	6	5	4	5	6	6	5	5	6	5	6	7	7	7	32	32	32	24.968	0	21.549	74483000	98	4785900	8630600	4206200	2809100	4338000	10426000	1037900	2652600	2220500	4848700	4053300	4658900	tr|A2RIY4|A2RIY4_LACLMDephospho-CoAkinaseOS=Lactococcuslactissubsp.cremoris(strainMG1363)GN=coaEPE=3SV=1	tr|A2RIY4|A2RIY4_LACLMDephospho-CoAkinaseOS=Lactococcuslactissubsp.cremoris(strainMG1363)GN=coaEPE=3SV=1
tr|A2RIY7|A2RIY7_LACLM	tr|A2RIY7|A2RIY7_LACLM	4	4	3	3	2	3	3	3	3	4	3	3	4	4	4	9.8	9.8	9.8	46.062	0	37.71	102950000	169	5715600	7630700	4685800	18288000	4995900	5581500	5633800	7213800	8034400	10135000	4299000	7739500	tr|A2RIY7|A2RIY7_LACLMFtsW1proteinOS=Lactococcuslactissubsp.cremoris(strainMG1363)GN=ftsW1PE=4SV=1	tr|A2RIY7|A2RIY7_LACLMFtsW1proteinOS=Lactococcuslactissubsp.cremoris(strainMG1363)GN=ftsW1PE=4SV=1
tr|A2RIY8|A2RIY8_LACLM	tr|A2RIY8|A2RIY8_LACLM	47	47	45	48	44	46	47	45	46	48	40	43	60	60	60	58.7	58.7	58.7	126.39	0	323.31	5575500000	4043	798350000	779460000	768110000	892170000	706950000	801670000	885240000	709830000	725040000	1074900000	676980000	680990000	tr|A2RIY8|A2RIY8_LACLMPyruvatecarboxylaseOS=Lactococcuslactissubsp.cremoris(strainMG1363)GN=pycAPE=4SV=1	tr|A2RIY8|A2RIY8_LACLMPyruvatecarboxylaseOS=Lactococcuslactissubsp.cremoris(strainMG1363)GN=pycAPE=4SV=1
tr|A2RIZ3|A2RIZ3_LACLM	tr|A2RIZ3|A2RIZ3_LACLM	8	7	5	6	4	7	7	6	5	3	5	3	13	12	12	63.1	63.1	63.1	21.04	0	42.04	206450000	253	27675000	46617000	40044000	52253000	46430000	55831000	64615000	57675000	46485000	51400000	48512000	17643000	tr|A2RIZ3|A2RIZ3_LACLMUncharacterizedproteinOS=Lactococcuslactissubsp.cremoris(strainMG1363)GN=llmg_0639PE=4SV=1	tr|A2RIZ3|A2RIZ3_LACLMUncharacterizedproteinOS=Lactococcuslactissubsp.cremoris(strainMG1363)GN=llmg_0639PE=4SV=1
tr|A2RIZ7|A2RIZ7_LACLM	tr|A2RIZ7|A2RIZ7_LACLM	13	13	11	24	24	29	22	30	25	30	28	31	36	36	36	42	42	42	101.29	0	323.31	372640000	1337	30195000	27460000	22286000	81308000	126750000	110370000	92394000	153070000	104050000	124050000	134250000	162710000	tr|A2RIZ7|A2RIZ7_LACLMPacLproteinOS=Lactococcuslactissubsp.cremoris(strainMG1363)GN=pacLPE=3SV=1	tr|A2RIZ7|A2RIZ7_LACLMPacLproteinOS=Lactococcuslactissubsp.cremoris(strainMG1363)GN=pacLPE=3SV=1
tr|A2RJ09|A2RJ09_LACLM	tr|A2RJ09|A2RJ09_LACLM	3	1	1	3	2	3	3	2	2	1	1	1	4	4	4	36.3	36.3	36.3	10.433	0	13.315	3943000	33	1584300	0	0	1094700	1167500	1113400	558300	1284800	965100	0	0	0	tr|A2RJ09|A2RJ09_LACLMUncharacterizedproteinOS=Lactococcuslactissubsp.cremoris(strainMG1363)GN=llmg_0655PE=4SV=1	tr|A2RJ09|A2RJ09_LACLMUncharacterizedproteinOS=Lactococcuslactissubsp.cremoris(strainMG1363)GN=llmg_0655PE=4SV=1
tr|A2RJ11|A2RJ11_LACLM	tr|A2RJ11|A2RJ11_LACLM	7	8	7	7	6	9	8	5	9	15	11	13	21	21	21	24.2	24.2	24.2	123.03	0	258.4	18387000	104	2314600	2468100	2002400	2256000	2777200	3751700	3386800	4086000	3676200	4186400	2726500	3513400	tr|A2RJ11|A2RJ11_LACLMHsdRproteinOS=Lactococcuslactissubsp.cremoris(strainMG1363)GN=hsdRPE=4SV=1	tr|A2RJ11|A2RJ11_LACLMHsdRproteinOS=Lactococcuslactissubsp.cremoris(strainMG1363)GN=hsdRPE=4SV=1
tr|A2RJ12|A2RJ12_LACLM	tr|A2RJ12|A2RJ12_LACLM	7	6	4	5	3	3	5	5	4	0	2	0	10	10	10	24.6	24.6	24.6	62.407	0	5.2998	91979000	30	2062400	2287500	3092500	1047100	2190800	2035400	1325000	778140	1697800	0	729280	0	tr|A2RJ12|A2RJ12_LACLMHsdMproteinOS=Lactococcuslactissubsp.cremoris(strainMG1363)GN=hsdMPE=4SV=1	tr|A2RJ12|A2RJ12_LACLMHsdMproteinOS=Lactococcuslactissubsp.cremoris(strainMG1363)GN=hsdMPE=4SV=1
tr|A2RJ13|A2RJ13_LACLM	tr|A2RJ13|A2RJ13_LACLM	0	0	0	2	1	1	0	0	0	2	0	1	2	2	2	5.3	5.3	5.3	47.336	0	3.2992	3964800	6	0	0	0	3478200	0	0	0	0	0	1886500	0	0	tr|A2RJ13|A2RJ13_LACLMHsdSproteinOS=Lactococcuslactissubsp.cremoris(strainMG1363)GN=hsdSPE=4SV=1	tr|A2RJ13|A2RJ13_LACLMHsdSproteinOS=Lactococcuslactissubsp.cremoris(strainMG1363)GN=hsdSPE=4SV=1
tr|A2RJ14|A2RJ14_LACLM	tr|A2RJ14|A2RJ14_LACLM	0	2	1	2	2	2	4	4	4	3	3	4	5	5	5	20.6	20.6	20.6	36.486	0	72.89	3215200	33	0	254670	0	248100	654690	352850	740290	640260	848360	884760	681400	1004500	tr|A2RJ14|A2RJ14_LACLMUncharacterizedproteinOS=Lactococcuslactissubsp.cremoris(strainMG1363)GN=llmg_0661PE=4SV=1	tr|A2RJ14|A2RJ14_LACLMUncharacterizedproteinOS=Lactococcuslactissubsp.cremoris(strainMG1363)GN=llmg_0661PE=4SV=1
tr|A2RJ24|A2RJ24_LACLM	tr|A2RJ24|A2RJ24_LACLM	1	1	1	0	0	0	0	0	0	1	0	1	2	2	2	11.2	11.2	11.2	24.382	0	3.7035	1242000	4	0	0	288150	0	0	0	0	0	0	0	0	0	tr|A2RJ24|A2RJ24_LACLMUncharacterizedproteinOS=Lactococcuslactissubsp.cremoris(strainMG1363)GN=llmg_0673PE=4SV=1	tr|A2RJ24|A2RJ24_LACLMUncharacterizedproteinOS=Lactococcuslactissubsp.cremoris(strainMG1363)GN=llmg_0673PE=4SV=1
tr|A2RJ49|A2RJ49_LACLM	tr|A2RJ49|A2RJ49_LACLM	6	8	5	6	6	5	4	5	4	3	3	3	9	9	9	34	34	34	37.371	0	77.205	36553000	74	3495700	2466300	3947300	2628700	3763500	4854400	2291500	1948500	2948000	5273100	2818000	3305800	tr|A2RJ49|A2RJ49_LACLMOppDproteinOS=Lactococcuslactissubsp.cremoris(strainMG1363)GN=oppDPE=3SV=1	tr|A2RJ49|A2RJ49_LACLMOppDproteinOS=Lactococcuslactissubsp.cremoris(strainMG1363)GN=oppDPE=3SV=1
tr|A2RJ50|A2RJ50_LACLM	tr|A2RJ50|A2RJ50_LACLM	5	6	4	2	1	1	3	3	3	2	3	3	10	10	10	27	27	27	35.976	0	53.616	14626000	25	1895100	2029300	2118800	0	0	0	0	1444900	2204100	0	1938800	2655400	tr|A2RJ50|A2RJ50_LACLMOppFproteinOS=Lactococcuslactissubsp.cremoris(strainMG1363)GN=oppFPE=3SV=1	tr|A2RJ50|A2RJ50_LACLMOppFproteinOS=Lactococcuslactissubsp.cremoris(strainMG1363)GN=oppFPE=3SV=1
tr|A2RJ52|A2RJ52_LACLM	tr|A2RJ52|A2RJ52_LACLM	2	1	2	1	1	1	1	2	2	1	1	2	2	2	2	5.1	5.1	5.1	32.835	0	2.4757	20960000	14	2258300	0	1647600	0	0	0	0	1208800	838550	0	0	0	tr|A2RJ52|A2RJ52_LACLMOppCproteinOS=Lactococcuslactissubsp.cremoris(strainMG1363)GN=oppCPE=3SV=1	tr|A2RJ52|A2RJ52_LACLMOppCproteinOS=Lactococcuslactissubsp.cremoris(strainMG1363)GN=oppCPE=3SV=1
tr|A2RJ53|A2RJ53_LACLM	tr|A2RJ53|A2RJ53_LACLM	22	24	24	14	15	12	17	16	14	8	15	9	42	42	28	70.7	70.7	49	65.84	0	323.31	4365000000	432	68268000	67155000	88245000	36975000	35293000	23415000	38100000	52863000	54529000	55737000	64341000	68588000	tr|A2RJ53|A2RJ53_LACLMOppAproteinOS=Lactococcuslactissubsp.cremoris(strainMG1363)GN=oppAPE=1SV=1	tr|A2RJ53|A2RJ53_LACLMOppAproteinOS=Lactococcuslactissubsp.cremoris(strainMG1363)GN=oppAPE=1SV=1
tr|A2RJ54|A2RJ54_LACLM	tr|A2RJ54|A2RJ54_LACLM	18	18	13	8	10	10	9	6	9	6	9	5	33	23	23	50.9	37	37	71.531	0	222.45	994080000	158	33363000	33810000	21510000	16112000	11035000	15646000	16569000	19032000	20085000	17565000	23825000	12911000	tr|A2RJ54|A2RJ54_LACLMPepOproteinOS=Lactococcuslactissubsp.cremoris(strainMG1363)GN=pepOPE=4SV=1	tr|A2RJ54|A2RJ54_LACLMPepOproteinOS=Lactococcuslactissubsp.cremoris(strainMG1363)GN=pepOPE=4SV=1
tr|A2RJ60|A2RJ60_LACLM	tr|A2RJ60|A2RJ60_LACLM	2	0	2	0	0	3	0	0	0	1	2	1	4	4	4	33	33	33	10.778	0	6.6269	1744400	13	0	0	0	0	0	507310	0	0	0	0	0	0	tr|A2RJ60|A2RJ60_LACLMUncharacterizedproteinOS=Lactococcuslactissubsp.cremoris(strainMG1363)GN=llmg_0708PE=4SV=1	tr|A2RJ60|A2RJ60_LACLMUncharacterizedproteinOS=Lactococcuslactissubsp.cremoris(strainMG1363)GN=llmg_0708PE=4SV=1
tr|A2RJ61|A2RJ61_LACLM	tr|A2RJ61|A2RJ61_LACLM	1	0	1	1	1	1	2	1	2	1	1	1	2	2	2	20.2	20.2	20.2	12.938	0	5.1966	1384400	10	0	0	0	0	0	0	441510	0	826130	0	0	0	tr|A2RJ61|A2RJ61_LACLMUncharacterizedproteinOS=Lactococcuslactissubsp.cremoris(strainMG1363)GN=llmg_0709PE=4SV=1	tr|A2RJ61|A2RJ61_LACLMUncharacterizedproteinOS=Lactococcuslactissubsp.cremoris(strainMG1363)GN=llmg_0709PE=4SV=1
tr|A2RJ62|A2RJ62_LACLM	tr|A2RJ62|A2RJ62_LACLM	1	1	1	1	2	1	1	1	1	1	1	1	2	2	2	5.1	5.1	5.1	31.465	0	2.8806	15117000	42	0	0	0	0	0	0	0	1310700	0	0	0	0	tr|A2RJ62|A2RJ62_LACLMUncharacterizedproteinOS=Lactococcuslactissubsp.cremoris(strainMG1363)GN=llmg_0710PE=4SV=1	tr|A2RJ62|A2RJ62_LACLMUncharacterizedproteinOS=Lactococcuslactissubsp.cremoris(strainMG1363)GN=llmg_0710PE=4SV=1
tr|A2RJ63|A2RJ63_LACLM	tr|A2RJ63|A2RJ63_LACLM	7	8	5	6	5	3	7	6	6	6	6	7	9	9	9	55.4	55.4	55.4	20.819	0	40.346	85626000	156	22776000	10897000	11113000	14172000	10835000	8474700	5897700	9834700	10381000	12576000	12881000	12353000	tr|A2RJ63|A2RJ63_LACLMTnpRproteinOS=Lactococcuslactissubsp.cremoris(strainMG1363)GN=tnpRPE=4SV=1	tr|A2RJ63|A2RJ63_LACLMTnpRproteinOS=Lactococcuslactissubsp.cremoris(strainMG1363)GN=tnpRPE=4SV=1
tr|A2RJ77|A2RJ77_LACLM	tr|A2RJ77|A2RJ77_LACLM	1	2	2	2	2	1	2	2	2	2	2	2	3	3	3	28.6	28.6	28.6	13.335	0	107.12	7626300	76	0	0	0	1775500	2530200	0	2583200	4224500	3753100	2453800	2806300	3131700	tr|A2RJ77|A2RJ77_LACLMUncharacterizedproteinOS=Lactococcuslactissubsp.cremoris(strainMG1363)GN=llmg_0724PE=4SV=1	tr|A2RJ77|A2RJ77_LACLMUncharacterizedproteinOS=Lactococcuslactissubsp.cremoris(strainMG1363)GN=llmg_0724PE=4SV=1
tr|A2RJ79|A2RJ79_LACLM	tr|A2RJ79|A2RJ79_LACLM	10	9	7	7	5	6	7	7	7	5	5	4	11	11	11	80.3	80.3	80.3	14.381	0	35.843	360680000	323	74951000	79489000	36465000	29114000	27371000	26882000	31013000	29024000	20570000	24149000	32585000	30716000	tr|A2RJ79|A2RJ79_LACLMUncharacterizedproteinOS=Lactococcuslactissubsp.cremoris(strainMG1363)GN=llmg_0726PE=4SV=1	tr|A2RJ79|A2RJ79_LACLMUncharacterizedproteinOS=Lactococcuslactissubsp.cremoris(strainMG1363)GN=llmg_0726PE=4SV=1
tr|A2RJ80|A2RJ80_LACLM	tr|A2RJ80|A2RJ80_LACLM	13	10	11	9	9	11	14	12	11	11	10	11	19	19	19	64.5	64.5	64.5	33.62	0	323.31	3190300000	1244	328920000	362310000	542630000	370910000	260320000	353230000	348060000	382320000	310520000	518850000	387220000	437360000	tr|A2RJ80|A2RJ80_LACLMPtnDproteinOS=Lactococcuslactissubsp.cremoris(strainMG1363)GN=ptnDPE=4SV=1	tr|A2RJ80|A2RJ80_LACLMPtnDproteinOS=Lactococcuslactissubsp.cremoris(strainMG1363)GN=ptnDPE=4SV=1
tr|A2RJ82|A2RJ82_LACLM	tr|A2RJ82|A2RJ82_LACLM	21	22	20	20	19	17	16	19	17	17	17	15	25	25	25	86	86	86	35.063	0	238.4	5941200000	1866	741180000	480450000	785340000	484860000	497040000	722160000	749510000	489320000	434260000	603380000	408420000	466420000	tr|A2RJ82|A2RJ82_LACLMPtnABproteinOS=Lactococcuslactissubsp.cremoris(strainMG1363)GN=ptnABPE=4SV=1	tr|A2RJ82|A2RJ82_LACLMPtnABproteinOS=Lactococcuslactissubsp.cremoris(strainMG1363)GN=ptnABPE=4SV=1
tr|A2RJ84|A2RJ84_LACLM	tr|A2RJ84|A2RJ84_LACLM	1	2	1	0	0	0	0	0	0	0	0	0	3	3	3	17.6	17.6	17.6	18.205	0.007348	1.4144	6366300	15	0	1686900	0	0	0	0	0	0	0	0	0	0	tr|A2RJ84|A2RJ84_LACLMUncharacterizedproteinOS=Lactococcuslactissubsp.cremoris(strainMG1363)GN=llmg_0731PE=4SV=1	tr|A2RJ84|A2RJ84_LACLMUncharacterizedproteinOS=Lactococcuslactissubsp.cremoris(strainMG1363)GN=llmg_0731PE=4SV=1
tr|A2RJ86|A2RJ86_LACLM	tr|A2RJ86|A2RJ86_LACLM	16	14	14	12	11	10	11	11	9	5	8	8	21	21	21	49.9	49.9	49.9	52.163	0	216.58	645780000	239	40856000	15098000	32239000	29862000	28385000	43992000	38472000	40234000	33282000	47253000	19111000	44303000	tr|A2RJ86|A2RJ86_LACLMUncharacterizedproteinOS=Lactococcuslactissubsp.cremoris(strainMG1363)GN=llmg_0733PE=4SV=1	tr|A2RJ86|A2RJ86_LACLMUncharacterizedproteinOS=Lactococcuslactissubsp.cremoris(strainMG1363)GN=llmg_0733PE=4SV=1
tr|A2RJ87|A2RJ87_LACLM	tr|A2RJ87|A2RJ87_LACLM	4	5	2	3	2	4	3	5	4	2	2	3	7	7	7	34	34	34	23.247	0	17.943	98092000	44	4162800	10395000	7641900	2160300	8555500	4535300	4030600	2418100	2682400	9775900	2571700	3882400	tr|A2RJ87|A2RJ87_LACLMUncharacterizedproteinOS=Lactococcuslactissubsp.cremoris(strainMG1363)GN=llmg_0734PE=4SV=1	tr|A2RJ87|A2RJ87_LACLMUncharacterizedproteinOS=Lactococcuslactissubsp.cremoris(strainMG1363)GN=llmg_0734PE=4SV=1
tr|A2RJ89|A2RJ89_LACLM	tr|A2RJ89|A2RJ89_LACLM	0	0	0	1	2	1	1	1	1	1	1	1	2	2	2	8.7	8.7	8.7	32.125	0	3.4999	874170	13	0	0	0	0	0	0	0	0	0	0	509050	0	tr|A2RJ89|A2RJ89_LACLMMalGproteinOS=Lactococcuslactissubsp.cremoris(strainMG1363)GN=malGPE=3SV=1	tr|A2RJ89|A2RJ89_LACLMMalGproteinOS=Lactococcuslactissubsp.cremoris(strainMG1363)GN=malGPE=3SV=1
tr|A2RJ91|A2RJ91_LACLM	tr|A2RJ91|A2RJ91_LACLM	15	21	15	13	10	14	15	17	16	9	11	10	28	28	28	65.8	65.8	65.8	43.514	0	323.31	314380000	243	27139000	21277000	24046000	13597000	8808200	16336000	16679000	15230000	15338000	18011000	12180000	24097000	tr|A2RJ91|A2RJ91_LACLMMalEproteinOS=Lactococcuslactissubsp.cremoris(strainMG1363)GN=malEPE=4SV=1	tr|A2RJ91|A2RJ91_LACLMMalEproteinOS=Lactococcuslactissubsp.cremoris(strainMG1363)GN=malEPE=4SV=1
tr|A2RJ92|A2RJ92_LACLM	tr|A2RJ92|A2RJ92_LACLM	3	3	0	0	1	1	1	0	2	0	1	0	5	5	5	12.3	12.3	12.3	68.062	0	24.917	21759000	12	604480	591610	0	0	0	0	0	0	0	0	0	0	tr|A2RJ92|A2RJ92_LACLMDexCproteinOS=Lactococcuslactissubsp.cremoris(strainMG1363)GN=dexCPE=4SV=1	tr|A2RJ92|A2RJ92_LACLMDexCproteinOS=Lactococcuslactissubsp.cremoris(strainMG1363)GN=dexCPE=4SV=1
tr|A2RJ98|A2RJ98_LACLM	tr|A2RJ98|A2RJ98_LACLM	12	14	8	6	3	4	4	5	6	2	4	3	16	16	16	49.7	49.7	49.7	36.239	0	57.704	54759000	101	10390000	7589300	7130900	2933400	2634200	984770	1716900	3095100	3312200	1826000	2204600	3908300	tr|A2RJ98|A2RJ98_LACLMMalRproteinOS=Lactococcuslactissubsp.cremoris(strainMG1363)GN=malRPE=4SV=1	tr|A2RJ98|A2RJ98_LACLMMalRproteinOS=Lactococcuslactissubsp.cremoris(strainMG1363)GN=malRPE=4SV=1
tr|A2RJ99|A2RJ99_LACLM	tr|A2RJ99|A2RJ99_LACLM	12	11	9	9	8	8	12	11	12	9	8	10	14	14	14	66.2	66.2	66.2	25.502	0	323.31	415040000	383	35870000	38395000	31356000	32079000	45122000	41386000	25892000	34410000	35368000	50035000	38399000	47037000	tr|A2RJ99|A2RJ99_LACLMLlrFproteinOS=Lactococcuslactissubsp.cremoris(strainMG1363)GN=llrFPE=4SV=1	tr|A2RJ99|A2RJ99_LACLMLlrFproteinOS=Lactococcuslactissubsp.cremoris(strainMG1363)GN=llrFPE=4SV=1
tr|A2RJA0|A2RJA0_LACLM	tr|A2RJA0|A2RJA0_LACLM	3	1	1	0	0	0	1	1	1	0	0	0	5	5	5	12.1	12.1	12.1	51.475	0.0073628	1.4536	12418000	4	1528800	0	0	0	0	0	0	0	0	0	0	0	tr|A2RJA0|A2RJA0_LACLMHistidinekinaseOS=Lactococcuslactissubsp.cremoris(strainMG1363)GN=kinFPE=4SV=1	tr|A2RJA0|A2RJA0_LACLMHistidinekinaseOS=Lactococcuslactissubsp.cremoris(strainMG1363)GN=kinFPE=4SV=1
tr|A2RJA1|A2RJA1_LACLM	tr|A2RJA1|A2RJA1_LACLM	11	15	11	9	7	7	11	8	8	3	6	6	19	19	19	40.9	40.9	40.9	63.861	0	73.531	878740000	167	22781000	14228000	18500000	20704000	14830000	11628000	15147000	16711000	21431000	10448000	14359000	25830000	tr|A2RJA1|A2RJA1_LACLM1-deoxy-D-xylulose-5-phosphatesynthaseOS=Lactococcuslactissubsp.cremoris(strainMG1363)GN=dxsBPE=4SV=1	tr|A2RJA1|A2RJA1_LACLM1-deoxy-D-xylulose-5-phosphatesynthaseOS=Lactococcuslactissubsp.cremoris(strainMG1363)GN=dxsBPE=4SV=1
tr|A2RJA3|A2RJA3_LACLM	tr|A2RJA3|A2RJA3_LACLM	9	9	7	2	2	1	1	2	4	1	1	1	14	14	13	27.9	27.9	27.7	54.727	0	59.325	108890000	39	3305000	4770200	4898300	1116800	0	0	0	1825400	2836800	0	0	0	tr|A2RJA3|A2RJA3_LACLMAscBproteinOS=Lactococcuslactissubsp.cremoris(strainMG1363)GN=ascBPE=3SV=1	tr|A2RJA3|A2RJA3_LACLMAscBproteinOS=Lactococcuslactissubsp.cremoris(strainMG1363)GN=ascBPE=3SV=1
tr|A2RJA4|A2RJA4_LACLM	tr|A2RJA4|A2RJA4_LACLM	36	37	30	30	30	32	33	30	31	28	27	29	48	48	48	58.7	58.7	58.7	99.408	0	323.31	2820100000	1027	103970000	111420000	105630000	181050000	199920000	210570000	222660000	188360000	139790000	122640000	200650000	237200000	tr|A2RJA4|A2RJA4_LACLMPipproteinOS=Lactococcuslactissubsp.cremoris(strainMG1363)GN=pipPE=4SV=1	tr|A2RJA4|A2RJA4_LACLMPipproteinOS=Lactococcuslactissubsp.cremoris(strainMG1363)GN=pipPE=4SV=1
tr|A2RJA5|A2RJA5_LACLM	tr|A2RJA5|A2RJA5_LACLM	13	10	7	10	8	9	12	13	12	8	7	10	16	16	16	56.9	56.9	56.9	27.722	0	173.35	227910000	265	20898000	14499000	22034000	15721000	8844000	20270000	18971000	13741000	13990000	17202000	13350000	12191000	tr|A2RJA5|A2RJA5_LACLMDemethylmenaquinonemethyltransferaseOS=Lactococcuslactissubsp.cremoris(strainMG1363)GN=menGPE=3SV=1	tr|A2RJA5|A2RJA5_LACLMDemethylmenaquinonemethyltransferaseOS=Lactococcuslactissubsp.cremoris(strainMG1363)GN=menGPE=3SV=1
tr|A2RJB1|A2RJB1_LACLM	tr|A2RJB1|A2RJB1_LACLM	0	1	0	0	0	0	1	1	1	2	2	1	3	3	3	7.2	7.2	7.2	36.251	0.00069109	2.412	1408900	19	0	0	0	0	0	0	0	0	0	1318300	1354500	0	tr|A2RJB1|A2RJB1_LACLMUbiAproteinOS=Lactococcuslactissubsp.cremoris(strainMG1363)GN=ubiAPE=4SV=1	tr|A2RJB1|A2RJB1_LACLMUbiAproteinOS=Lactococcuslactissubsp.cremoris(strainMG1363)GN=ubiAPE=4SV=1
tr|A2RJB2|A2RJB2_LACLM	tr|A2RJB2|A2RJB2_LACLM	1	1	0	0	0	0	1	1	1	0	0	0	2	2	2	15.1	15.1	15.1	20.474	0	2.5322	394350	13	315710	0	0	0	0	0	0	0	0	0	0	0	tr|A2RJB2|A2RJB2_LACLMUncharacterizedproteinOS=Lactococcuslactissubsp.cremoris(strainMG1363)GN=llmg_0760PE=4SV=1	tr|A2RJB2|A2RJB2_LACLMUncharacterizedproteinOS=Lactococcuslactissubsp.cremoris(strainMG1363)GN=llmg_0760PE=4SV=1
tr|A2RJB3|A2RJB3_LACLM	tr|A2RJB3|A2RJB3_LACLM	9	10	6	8	7	9	6	6	6	3	5	3	13	13	13	54	54	54	36.015	0	101.88	99737000	179	13398000	11457000	12678000	10606000	9936200	26787000	12828000	11005000	8904400	7174100	9477400	9489000	tr|A2RJB3|A2RJB3_LACLMUncharacterizedproteinOS=Lactococcuslactissubsp.cremoris(strainMG1363)GN=llmg_0761PE=4SV=1	tr|A2RJB3|A2RJB3_LACLMUncharacterizedproteinOS=Lactococcuslactissubsp.cremoris(strainMG1363)GN=llmg_0761PE=4SV=1
tr|A2RJB5|A2RJB5_LACLM	tr|A2RJB5|A2RJB5_LACLM	18	18	18	15	15	14	13	14	15	15	13	15	20	20	20	56.7	56.7	56.7	35.291	0	225.73	1681300000	527	147900000	150550000	145460000	116120000	122190000	153320000	131720000	101340000	103020000	85850000	87436000	82695000	tr|A2RJB5|A2RJB5_LACLMPtaproteinOS=Lactococcuslactissubsp.cremoris(strainMG1363)GN=ptaPE=4SV=1	tr|A2RJB5|A2RJB5_LACLMPtaproteinOS=Lactococcuslactissubsp.cremoris(strainMG1363)GN=ptaPE=4SV=1
tr|A2RJB7|A2RJB7_LACLM	tr|A2RJB7|A2RJB7_LACLM	12	12	13	9	8	10	10	11	10	9	9	10	14	14	14	74.3	74.3	74.3	29.192	0	323.31	586700000	366	34025000	98547000	70862000	77559000	64358000	81815000	76955000	68121000	72855000	58120000	65810000	67635000	tr|A2RJB7|A2RJB7_LACLMUncharacterizedproteinOS=Lactococcuslactissubsp.cremoris(strainMG1363)GN=llmg_0765PE=4SV=1	tr|A2RJB7|A2RJB7_LACLMUncharacterizedproteinOS=Lactococcuslactissubsp.cremoris(strainMG1363)GN=llmg_0765PE=4SV=1
tr|A2RJB9|A2RJB9_LACLM	tr|A2RJB9|A2RJB9_LACLM	3	3	3	2	2	0	2	2	2	2	2	3	5	5	5	28.1	28.1	28.1	22.083	0.0027285	2.032	14284000	28	4593400	3262200	0	0	0	0	0	0	0	0	0	0	tr|A2RJB9|A2RJB9_LACLMUncharacterizedproteinOS=Lactococcuslactissubsp.cremoris(strainMG1363)GN=llmg_0767PE=4SV=1	tr|A2RJB9|A2RJB9_LACLMUncharacterizedproteinOS=Lactococcuslactissubsp.cremoris(strainMG1363)GN=llmg_0767PE=4SV=1
tr|A2RJC0|A2RJC0_LACLM	tr|A2RJC0|A2RJC0_LACLM	6	7	5	8	8	7	5	7	6	6	7	5	12	12	12	41.6	41.6	41.6	38.228	0	87.65	142440000	80	10220000	9863200	11849000	13543000	14746000	15086000	9245800	9696000	10552000	10001000	11242000	16235000	tr|A2RJC0|A2RJC0_LACLMHolAproteinOS=Lactococcuslactissubsp.cremoris(strainMG1363)GN=holAPE=4SV=1	tr|A2RJC0|A2RJC0_LACLMHolAproteinOS=Lactococcuslactissubsp.cremoris(strainMG1363)GN=holAPE=4SV=1
tr|A2RJC1|A2RJC1_LACLM	tr|A2RJC1|A2RJC1_LACLM	11	11	12	9	8	6	7	7	7	4	4	6	12	12	12	87.5	87.5	87.5	14.926	0	219.68	922110000	628	106050000	89736000	119580000	53773000	63138000	33766000	45572000	41440000	37383000	33066000	29105000	33290000	tr|A2RJC1|A2RJC1_LACLMCellcycleproteinGpsBOS=Lactococcuslactissubsp.cremoris(strainMG1363)GN=llmg_0769PE=4SV=1	tr|A2RJC1|A2RJC1_LACLMCellcycleproteinGpsBOS=Lactococcuslactissubsp.cremoris(strainMG1363)GN=llmg_0769PE=4SV=1
tr|A2RJC2|A2RJC2_LACLM	tr|A2RJC2|A2RJC2_LACLM	11	13	7	13	13	11	9	12	13	8	11	8	17	17	17	45.8	45.8	45.8	43.381	0	253.5	248610000	295	17847000	18961000	17163000	28731000	26595000	49051000	46991000	30375000	29605000	27497000	20723000	26037000	tr|A2RJC2|A2RJC2_LACLMUncharacterizedproteinOS=Lactococcuslactissubsp.cremoris(strainMG1363)GN=llmg_0771PE=4SV=1	tr|A2RJC2|A2RJC2_LACLMUncharacterizedproteinOS=Lactococcuslactissubsp.cremoris(strainMG1363)GN=llmg_0771PE=4SV=1
tr|A2RJC3|A2RJC3_LACLM	tr|A2RJC3|A2RJC3_LACLM	33	36	32	39	37	37	35	34	36	40	30	29	49	49	49	58.9	58.9	58.9	72.707	0	323.31	1633200000	1597	248500000	257270000	237390000	192750000	190300000	198940000	201570000	252810000	203200000	283780000	118850000	123440000	tr|A2RJC3|A2RJC3_LACLMMid-cell-anchoredproteinZOS=Lactococcuslactissubsp.cremoris(strainMG1363)GN=mapZPE=3SV=1	tr|A2RJC3|A2RJC3_LACLMMid-cell-anchoredproteinZOS=Lactococcuslactissubsp.cremoris(strainMG1363)GN=mapZPE=3SV=1
tr|A2RJC4|A2RJC4_LACLM	tr|A2RJC4|A2RJC4_LACLM	18	17	17	17	16	17	15	15	14	13	14	11	24	24	24	71	71	71	39.959	0	323.31	4787700000	1025	584770000	327570000	601230000	358490000	399470000	735410000	672390000	327230000	304200000	320750000	266960000	339140000	tr|A2RJC4|A2RJC4_LACLMPepQproteinOS=Lactococcuslactissubsp.cremoris(strainMG1363)GN=pepQPE=3SV=1	tr|A2RJC4|A2RJC4_LACLMPepQproteinOS=Lactococcuslactissubsp.cremoris(strainMG1363)GN=pepQPE=3SV=1
tr|A2RJC5|A2RJC5_LACLM	tr|A2RJC5|A2RJC5_LACLM	17	20	19	21	20	19	17	20	18	15	17	17	23	23	23	79.2	79.2	79.2	36.684	0	323.31	2997900000	1625	215360000	240430000	322930000	255940000	251540000	326950000	240900000	192390000	189410000	255950000	169740000	254470000	tr|A2RJC5|A2RJC5_LACLMCcpAproteinOS=Lactococcuslactissubsp.cremoris(strainMG1363)GN=ccpAPE=4SV=1	tr|A2RJC5|A2RJC5_LACLMCcpAproteinOS=Lactococcuslactissubsp.cremoris(strainMG1363)GN=ccpAPE=4SV=1
tr|A2RJC9|A2RJC9_LACLM	tr|A2RJC9|A2RJC9_LACLM	8	6	7	7	7	7	8	7	7	8	8	7	10	10	10	76.9	76.9	76.9	11.671	0	323.31	3826000000	727	338550000	369810000	235900000	858980000	708410000	1012500000	668780000	694800000	687010000	545890000	661370000	578710000	tr|A2RJC9|A2RJC9_LACLMThioredoxinOS=Lactococcuslactissubsp.cremoris(strainMG1363)GN=trxAPE=3SV=1	tr|A2RJC9|A2RJC9_LACLMThioredoxinOS=Lactococcuslactissubsp.cremoris(strainMG1363)GN=trxAPE=3SV=1
tr|A2RJD2|A2RJD2_LACLM	tr|A2RJD2|A2RJD2_LACLM	29	30	22	22	24	19	18	26	24	15	24	16	37	37	37	81.7	81.7	81.7	49.735	0	251.78	2744700000	673	121430000	129810000	156350000	137420000	133310000	125130000	129720000	145450000	152240000	88256000	151680000	153950000	tr|A2RJD2|A2RJD2_LACLMAdenylosuccinatelyaseOS=Lactococcuslactissubsp.cremoris(strainMG1363)GN=purBPE=3SV=1	tr|A2RJD2|A2RJD2_LACLMAdenylosuccinatelyaseOS=Lactococcuslactissubsp.cremoris(strainMG1363)GN=purBPE=3SV=1
tr|A2RJD3|A2RJD3_LACLM	tr|A2RJD3|A2RJD3_LACLM	0	1	0	1	1	1	0	0	0	0	0	0	2	2	2	7.3	7.3	7.3	36.598	0.0013784	2.302	1060700	2	0	69036	0	0	0	0	0	0	0	0	0	0	tr|A2RJD3|A2RJD3_LACLMRbsRproteinOS=Lactococcuslactissubsp.cremoris(strainMG1363)GN=rbsRPE=4SV=1	tr|A2RJD3|A2RJD3_LACLMRbsRproteinOS=Lactococcuslactissubsp.cremoris(strainMG1363)GN=rbsRPE=4SV=1
tr|A2RJD8|A2RJD8_LACLM	tr|A2RJD8|A2RJD8_LACLM	4	3	2	1	1	1	1	0	2	1	1	1	5	5	5	18.8	18.8	18.8	34.295	0	15.633	3439900	23	878310	286630	933330	0	0	0	0	0	0	0	0	0	tr|A2RJD8|A2RJD8_LACLMRbsBproteinOS=Lactococcuslactissubsp.cremoris(strainMG1363)GN=rbsBPE=4SV=1	tr|A2RJD8|A2RJD8_LACLMRbsBproteinOS=Lactococcuslactissubsp.cremoris(strainMG1363)GN=rbsBPE=4SV=1
tr|A2RJE0|A2RJE0_LACLM	tr|A2RJE0|A2RJE0_LACLM	5	3	7	4	3	4	6	6	6	5	3	4	8	8	8	41.3	41.3	41.3	22.355	0	156.27	116230000	139	16400000	9014900	11759000	11842000	9450400	12180000	16633000	10497000	12077000	7399300	8004600	11576000	tr|A2RJE0|A2RJE0_LACLMPs302proteinOS=Lactococcuslactissubsp.cremoris(strainMG1363)GN=ps302PE=4SV=1	tr|A2RJE0|A2RJE0_LACLMPs302proteinOS=Lactococcuslactissubsp.cremoris(strainMG1363)GN=ps302PE=4SV=1
tr|A2RJE2|A2RJE2_LACLM	tr|A2RJE2|A2RJE2_LACLM	4	7	3	6	6	2	4	4	5	3	2	3	9	9	9	53.3	53.3	53.3	18.999	0	102.55	533690000	85	13020000	31513000	28501000	16784000	6465200	6507000	7267900	7996100	8553900	4180400	5580100	9168100	tr|A2RJE2|A2RJE2_LACLMPs304proteinOS=Lactococcuslactissubsp.cremoris(strainMG1363)GN=ps304PE=4SV=1	tr|A2RJE2|A2RJE2_LACLMPs304proteinOS=Lactococcuslactissubsp.cremoris(strainMG1363)GN=ps304PE=4SV=1
tr|A2RJE3|A2RJE3_LACLM	tr|A2RJE3|A2RJE3_LACLM	3	3	3	3	3	2	3	2	2	3	3	2	5	5	5	21.6	21.6	21.6	31.19	0	53.57	16044000	38	1042000	2311700	1442000	1561300	1855200	1252800	1882300	2106500	2045600	1568100	1296200	1644900	tr|A2RJE3|A2RJE3_LACLMPs305proteinOS=Lactococcuslactissubsp.cremoris(strainMG1363)GN=ps305PE=4SV=1	tr|A2RJE3|A2RJE3_LACLMPs305proteinOS=Lactococcuslactissubsp.cremoris(strainMG1363)GN=ps305PE=4SV=1
tr|A2RJH6|A2RJH6_LACLM	tr|A2RJH6|A2RJH6_LACLM	2	2	1	2	2	2	2	2	2	3	3	2	4	4	4	25.6	25.6	25.6	20.177	0	6.5214	5095400	17	0	1574700	0	913970	608290	921810	0	0	0	563460	1210800	2832700	tr|A2RJH6|A2RJH6_LACLMPs338proteinOS=Lactococcuslactissubsp.cremoris(strainMG1363)GN=ps338PE=4SV=1	tr|A2RJH6|A2RJH6_LACLMPs338proteinOS=Lactococcuslactissubsp.cremoris(strainMG1363)GN=ps338PE=4SV=1
tr|A2RJH8|A2RJH8_LACLM	tr|A2RJH8|A2RJH8_LACLM	7	3	7	2	2	5	2	2	4	6	4	4	8	8	8	83.3	83.3	83.3	10.457	0	122.11	144380000	160	33006000	11576000	25751000	7475400	1990700	17525000	6129700	5579400	8186300	13885000	20858000	13779000	tr|A2RJH8|A2RJH8_LACLMPs340proteinOS=Lactococcuslactissubsp.cremoris(strainMG1363)GN=ps340PE=4SV=1	tr|A2RJH8|A2RJH8_LACLMPs340proteinOS=Lactococcuslactissubsp.cremoris(strainMG1363)GN=ps340PE=4SV=1
tr|A2RJI0|A2RJI0_LACLM	tr|A2RJI0|A2RJI0_LACLM	0	0	0	1	2	2	1	2	2	0	2	0	3	3	3	14	14	14	39.293	0	3.0633	3295400	7	0	0	0	0	4329600	20812000	0	0	0	0	0	0	tr|A2RJI0|A2RJI0_LACLMPs342proteinOS=Lactococcuslactissubsp.cremoris(strainMG1363)GN=ps342PE=4SV=1	tr|A2RJI0|A2RJI0_LACLMPs342proteinOS=Lactococcuslactissubsp.cremoris(strainMG1363)GN=ps342PE=4SV=1
tr|A2RJJ5|A2RJJ5_LACLM	tr|A2RJJ5|A2RJJ5_LACLM	6	9	3	4	4	3	4	4	4	4	3	3	9	9	9	19.1	19.1	19.1	37.516	0	80.224	56323000	75	7500100	7163600	10226000	5650300	7295800	1414400	3750600	5088600	4680500	3201600	3291900	4537000	tr|A2RJJ5|A2RJJ5_LACLMPs357proteinOS=Lactococcuslactissubsp.cremoris(strainMG1363)GN=ps357PE=4SV=1	tr|A2RJJ5|A2RJJ5_LACLMPs357proteinOS=Lactococcuslactissubsp.cremoris(strainMG1363)GN=ps357PE=4SV=1
tr|A2RJJ9|A2RJJ9_LACLM	tr|A2RJJ9|A2RJJ9_LACLM	1	2	2	1	2	1	2	2	2	3	3	2	4	4	4	5.8	5.8	5.8	50.377	0	4.4265	69610000	76	0	5725000	12953000	0	5004100	0	0	4875800	0	7317200	7577900	10756000	tr|A2RJJ9|A2RJJ9_LACLMUncharacterizedproteinOS=Lactococcuslactissubsp.cremoris(strainMG1363)GN=llmg_0856PE=4SV=1	tr|A2RJJ9|A2RJJ9_LACLMUncharacterizedproteinOS=Lactococcuslactissubsp.cremoris(strainMG1363)GN=llmg_0856PE=4SV=1
tr|A2RJK0|A2RJK0_LACLM	tr|A2RJK0|A2RJK0_LACLM	5	2	4	6	3	5	4	5	5	3	3	3	8	8	8	36.7	36.7	36.7	26.371	0	119.48	46540000	54	8753300	5086600	8016900	8508000	6734800	6660100	9262000	7508100	7631200	8225300	5035600	5710000	tr|A2RJK0|A2RJK0_LACLMKdgRproteinOS=Lactococcuslactissubsp.cremoris(strainMG1363)GN=kdgRPE=4SV=1	tr|A2RJK0|A2RJK0_LACLMKdgRproteinOS=Lactococcuslactissubsp.cremoris(strainMG1363)GN=kdgRPE=4SV=1
tr|A2RJL0|A2RJL0_LACLM	tr|A2RJL0|A2RJL0_LACLM	34	34	30	24	24	22	25	26	24	17	22	18	37	37	37	64.6	64.6	64.6	71.711	0	323.31	15328000000	1512	300590000	322180000	333580000	195130000	195840000	209420000	222050000	180580000	194050000	241650000	171410000	230330000	tr|A2RJL0|A2RJL0_LACLMTransketolaseOS=Lactococcuslactissubsp.cremoris(strainMG1363)GN=tktPE=3SV=1	tr|A2RJL0|A2RJL0_LACLMTransketolaseOS=Lactococcuslactissubsp.cremoris(strainMG1363)GN=tktPE=3SV=1
tr|A2RJL2|A2RJL2_LACLM	tr|A2RJL2|A2RJL2_LACLM	2	2	2	2	2	2	3	2	2	2	2	2	3	3	3	14.3	14.3	14.3	29.979	0	134.38	163780000	462	20624000	20326000	23902000	9520900	7917300	40395000	60075000	27882000	43506000	50398000	23146000	22540000	tr|A2RJL2|A2RJL2_LACLMUncharacterizedproteinOS=Lactococcuslactissubsp.cremoris(strainMG1363)GN=llmg_0870PE=3SV=1	tr|A2RJL2|A2RJL2_LACLMUncharacterizedproteinOS=Lactococcuslactissubsp.cremoris(strainMG1363)GN=llmg_0870PE=3SV=1
tr|A2RJL3|A2RJL3_LACLM	tr|A2RJL3|A2RJL3_LACLM	8	12	8	9	8	10	8	10	8	8	7	7	15	15	15	54	54	54	39.566	0	87.106	551740000	208	52683000	30686000	45711000	17917000	40985000	33348000	26503000	34291000	35156000	45411000	33243000	52079000	tr|A2RJL3|A2RJL3_LACLMAspartate-semialdehydedehydrogenaseOS=Lactococcuslactissubsp.cremoris(strainMG1363)GN=asdPE=3SV=1	tr|A2RJL3|A2RJL3_LACLMAspartate-semialdehydedehydrogenaseOS=Lactococcuslactissubsp.cremoris(strainMG1363)GN=asdPE=3SV=1
tr|A2RJL4|A2RJL4_LACLM	tr|A2RJL4|A2RJL4_LACLM	3	6	6	5	7	5	3	3	4	4	5	3	9	9	9	54.8	54.8	54.8	17.506	0	128.95	128540000	141	23368000	12792000	21485000	8355400	9416000	7620600	8640200	7605300	6755100	11289000	13291000	9666600	tr|A2RJL4|A2RJL4_LACLMUncharacterizedproteinOS=Lactococcuslactissubsp.cremoris(strainMG1363)GN=llmg_0872PE=3SV=1	tr|A2RJL4|A2RJL4_LACLMUncharacterizedproteinOS=Lactococcuslactissubsp.cremoris(strainMG1363)GN=llmg_0872PE=3SV=1
tr|A2RJL5|A2RJL5_LACLM	tr|A2RJL5|A2RJL5_LACLM	3	4	3	2	2	2	3	2	1	1	2	1	5	5	5	34.4	34.4	34.4	17.643	0	6.0409	19940000	26	2318100	1907100	1659300	2697900	2160700	2600200	2778200	1590100	0	0	1816600	0	tr|A2RJL5|A2RJL5_LACLMUncharacterizedproteinOS=Lactococcuslactissubsp.cremoris(strainMG1363)GN=llmg_0873PE=3SV=1	tr|A2RJL5|A2RJL5_LACLMUncharacterizedproteinOS=Lactococcuslactissubsp.cremoris(strainMG1363)GN=llmg_0873PE=3SV=1
tr|A2RJL8|A2RJL8_LACLM	tr|A2RJL8|A2RJL8_LACLM	28	32	26	19	25	22	22	25	22	13	21	17	37	37	37	65.4	65.4	65.4	63.407	0	323.31	7423400000	1066	171470000	150560000	149590000	97350000	134670000	135740000	141990000	110900000	93809000	78177000	98884000	159840000	tr|A2RJL8|A2RJL8_LACLMRibonucleaseJOS=Lactococcuslactissubsp.cremoris(strainMG1363)GN=rnjPE=3SV=1	tr|A2RJL8|A2RJL8_LACLMRibonucleaseJOS=Lactococcuslactissubsp.cremoris(strainMG1363)GN=rnjPE=3SV=1
tr|A2RJM0|A2RJM0_LACLM	tr|A2RJM0|A2RJM0_LACLM	34	32	26	26	25	25	21	22	24	21	21	23	36	36	36	69.1	69.1	69.1	56.86	0	323.31	6755300000	1140	357600000	348550000	382320000	169050000	320060000	336960000	320100000	276670000	316580000	368360000	286110000	299200000	tr|A2RJM0|A2RJM0_LACLMSignalrecognitionparticleproteinOS=Lactococcuslactissubsp.cremoris(strainMG1363)GN=ffhPE=3SV=1	tr|A2RJM0|A2RJM0_LACLMSignalrecognitionparticleproteinOS=Lactococcuslactissubsp.cremoris(strainMG1363)GN=ffhPE=3SV=1
tr|A2RJM1|A2RJM1_LACLM	tr|A2RJM1|A2RJM1_LACLM	4	2	3	1	2	2	4	3	2	3	2	3	7	7	7	37.8	37.8	37.8	21.026	0	53.946	68155000	130	9507500	13954000	12932000	0	4921500	17307000	4561000	12034000	14345000	3049900	9416700	9980000	tr|A2RJM1|A2RJM1_LACLMSpeGproteinOS=Lactococcuslactissubsp.cremoris(strainMG1363)GN=speGPE=4SV=1	tr|A2RJM1|A2RJM1_LACLMSpeGproteinOS=Lactococcuslactissubsp.cremoris(strainMG1363)GN=speGPE=4SV=1
tr|A2RJM2|A2RJM2_LACLM	tr|A2RJM2|A2RJM2_LACLM	4	2	3	4	2	2	6	4	7	4	3	4	9	9	9	64.7	64.7	64.7	20.301	0	16.726	119270000	54	1074000	5477000	1165800	2397500	2389200	1527700	1922500	1792800	2577600	2125600	2181400	2235100	tr|A2RJM2|A2RJM2_LACLMUncharacterizedproteinOS=Lactococcuslactissubsp.cremoris(strainMG1363)GN=llmg_0880PE=4SV=1	tr|A2RJM2|A2RJM2_LACLMUncharacterizedproteinOS=Lactococcuslactissubsp.cremoris(strainMG1363)GN=llmg_0880PE=4SV=1
tr|A2RJM6|A2RJM6_LACLM	tr|A2RJM6|A2RJM6_LACLM	15	16	12	8	9	5	8	10	8	7	11	7	21	21	21	46.4	46.4	46.4	55.463	0	145.42	567210000	153	13727000	12431000	19175000	7329700	9678900	5130200	8394000	8123100	9940900	11847000	8488900	8126800	tr|A2RJM6|A2RJM6_LACLMUncharacterizedproteinOS=Lactococcuslactissubsp.cremoris(strainMG1363)GN=llmg_0884PE=4SV=1	tr|A2RJM6|A2RJM6_LACLMUncharacterizedproteinOS=Lactococcuslactissubsp.cremoris(strainMG1363)GN=llmg_0884PE=4SV=1
tr|A2RJM7|A2RJM7_LACLM	tr|A2RJM7|A2RJM7_LACLM	5	6	6	6	7	6	4	4	5	5	4	5	10	10	10	38.4	38.4	38.4	29.624	0	34.776	126660000	105	14305000	9177200	11507000	11090000	10483000	7275700	7087100	7132300	10756000	6708900	9303600	10810000	tr|A2RJM7|A2RJM7_LACLMGlutamate5-kinaseOS=Lactococcuslactissubsp.cremoris(strainMG1363)GN=proBPE=3SV=1	tr|A2RJM7|A2RJM7_LACLMGlutamate5-kinaseOS=Lactococcuslactissubsp.cremoris(strainMG1363)GN=proBPE=3SV=1
tr|A2RJN0|A2RJN0_LACLM	tr|A2RJN0|A2RJN0_LACLM	3	1	2	2	1	1	2	1	0	1	1	1	3	3	3	36.4	36.4	36.4	11.323	0	10.936	11145000	21	2257000	2431400	1697900	2072000	0	0	785870	0	0	0	0	0	tr|A2RJN0|A2RJN0_LACLMRarAproteinOS=Lactococcuslactissubsp.cremoris(strainMG1363)GN=rarAPE=4SV=1	tr|A2RJN0|A2RJN0_LACLMRarAproteinOS=Lactococcuslactissubsp.cremoris(strainMG1363)GN=rarAPE=4SV=1
tr|A2RJN3|A2RJN3_LACLM	tr|A2RJN3|A2RJN3_LACLM	3	4	0	1	1	1	0	1	0	2	2	2	4	4	4	8.4	8.4	8.4	45.223	0	4.8241	29210000	42	1589300	3380200	0	0	0	0	0	0	0	2125700	1552300	2266100	tr|A2RJN3|A2RJN3_LACLMPyrPproteinOS=Lactococcuslactissubsp.cremoris(strainMG1363)GN=pyrPPE=4SV=1	tr|A2RJN3|A2RJN3_LACLMPyrPproteinOS=Lactococcuslactissubsp.cremoris(strainMG1363)GN=pyrPPE=4SV=1
tr|A2RJP4|A2RJP4_LACLM	tr|A2RJP4|A2RJP4_LACLM	3	4	2	0	0	0	0	1	0	2	2	1	4	4	4	15.1	15.1	15.1	31.463	0	9.7186	21006000	11	2935700	2546500	2335600	0	0	0	0	0	0	5249600	0	0	tr|A2RJP4|A2RJP4_LACLMUncharacterizedproteinOS=Lactococcuslactissubsp.cremoris(strainMG1363)GN=llmg_0903PE=4SV=1	tr|A2RJP4|A2RJP4_LACLMUncharacterizedproteinOS=Lactococcuslactissubsp.cremoris(strainMG1363)GN=llmg_0903PE=4SV=1
tr|A2RJP5|A2RJP5_LACLM	tr|A2RJP5|A2RJP5_LACLM	1	1	6	1	1	0	1	0	1	1	0	0	6	6	6	35	35	35	34.035	0	30.007	8551200	33	0	0	3967800	0	0	0	0	0	0	0	0	0	tr|A2RJP5|A2RJP5_LACLMUncharacterizedproteinOS=Lactococcuslactissubsp.cremoris(strainMG1363)GN=llmg_0904PE=4SV=1	tr|A2RJP5|A2RJP5_LACLMUncharacterizedproteinOS=Lactococcuslactissubsp.cremoris(strainMG1363)GN=llmg_0904PE=4SV=1
tr|A2RJP8|A2RJP8_LACLM	tr|A2RJP8|A2RJP8_LACLM	2	1	3	4	3	3	4	4	5	5	4	6	7	7	7	59.7	59.7	59.7	20.241	0	35.666	150130000	35	14576000	0	50025000	18378000	8103500	9741900	23555000	17953000	9471800	16222000	27237000	14881000	tr|A2RJP8|A2RJP8_LACLMUncharacterizedproteinOS=Lactococcuslactissubsp.cremoris(strainMG1363)GN=llmg_0907PE=4SV=1	tr|A2RJP8|A2RJP8_LACLMUncharacterizedproteinOS=Lactococcuslactissubsp.cremoris(strainMG1363)GN=llmg_0907PE=4SV=1
tr|A2RJP9|A2RJP9_LACLM	tr|A2RJP9|A2RJP9_LACLM	15	11	14	11	13	14	16	15	14	14	11	13	18	18	18	72.6	72.6	72.6	26.654	0	261.57	2006800000	750	216980000	182580000	126930000	189290000	279440000	358430000	267270000	263250000	243070000	128710000	279850000	161900000	tr|A2RJP9|A2RJP9_LACLMLlrAproteinOS=Lactococcuslactissubsp.cremoris(strainMG1363)GN=llrAPE=4SV=1	tr|A2RJP9|A2RJP9_LACLMLlrAproteinOS=Lactococcuslactissubsp.cremoris(strainMG1363)GN=llrAPE=4SV=1
tr|A2RJQ0|A2RJQ0_LACLM	tr|A2RJQ0|A2RJQ0_LACLM	3	2	0	1	2	2	1	1	1	2	3	2	6	6	6	15.7	15.7	15.7	56.549	0	6.7836	55961000	31	1201700	2688200	0	0	1889500	3332600	0	0	0	0	0	0	tr|A2RJQ0|A2RJQ0_LACLMHistidinekinaseOS=Lactococcuslactissubsp.cremoris(strainMG1363)GN=kinAPE=4SV=1	tr|A2RJQ0|A2RJQ0_LACLMHistidinekinaseOS=Lactococcuslactissubsp.cremoris(strainMG1363)GN=kinAPE=4SV=1
tr|A2RJQ2|A2RJQ2_LACLM	tr|A2RJQ2|A2RJQ2_LACLM	4	3	4	4	5	5	4	5	3	6	5	5	8	8	8	68.1	68.1	68.1	12.623	0	28.2	62940000	138	13690000	11285000	9344700	9662200	12723000	5335700	4597100	10932000	6715300	7658300	10104000	14703000	tr|A2RJQ2|A2RJQ2_LACLMGlnBproteinOS=Lactococcuslactissubsp.cremoris(strainMG1363)GN=glnBPE=3SV=1	tr|A2RJQ2|A2RJQ2_LACLMGlnBproteinOS=Lactococcuslactissubsp.cremoris(strainMG1363)GN=glnBPE=3SV=1
tr|A2RJQ5|A2RJQ5_LACLM	tr|A2RJQ5|A2RJQ5_LACLM	18	17	14	12	8	10	9	11	8	8	7	9	20	20	20	48.2	48.2	48.2	43.462	0	185.17	768200000	194	11189000	15123000	15199000	16370000	11098000	17660000	11864000	12999000	9710000	26860000	12645000	23506000	tr|A2RJQ5|A2RJQ5_LACLMCelldivisionproteinDivIBOS=Lactococcuslactissubsp.cremoris(strainMG1363)GN=ftsQPE=3SV=1	tr|A2RJQ5|A2RJQ5_LACLMCelldivisionproteinDivIBOS=Lactococcuslactissubsp.cremoris(strainMG1363)GN=ftsQPE=3SV=1
tr|A2RJR8|A2RJR8_LACLM	tr|A2RJR8|A2RJR8_LACLM	9	9	9	11	9	8	9	7	6	7	8	7	14	14	14	46.9	46.9	46.9	42.666	0	194.89	679740000	318	46118000	50663000	38002000	35398000	38772000	31926000	24371000	15194000	21796000	34577000	36098000	19087000	tr|A2RJR8|A2RJR8_LACLMHmcMproteinOS=Lactococcuslactissubsp.cremoris(strainMG1363)GN=hmcMPE=4SV=1	tr|A2RJR8|A2RJR8_LACLMHmcMproteinOS=Lactococcuslactissubsp.cremoris(strainMG1363)GN=hmcMPE=4SV=1
tr|A2RJR9|A2RJR9_LACLM	tr|A2RJR9|A2RJR9_LACLM	9	10	8	11	10	12	9	9	10	7	8	7	13	13	13	59.3	59.3	59.3	40.329	0	323.31	594280000	379	27959000	41074000	41277000	48607000	42405000	63827000	49774000	48230000	40189000	49392000	31015000	47478000	tr|A2RJR9|A2RJR9_LACLMThiLproteinOS=Lactococcuslactissubsp.cremoris(strainMG1363)GN=thiLPE=3SV=1	tr|A2RJR9|A2RJR9_LACLMThiLproteinOS=Lactococcuslactissubsp.cremoris(strainMG1363)GN=thiLPE=3SV=1
tr|A2RJS0|A2RJS0_LACLM	tr|A2RJS0|A2RJS0_LACLM	11	14	9	11	10	9	9	11	10	9	11	8	17	17	17	44.9	44.9	44.9	44.943	0	168.61	131150000	189	14398000	10778000	12149000	3610700	9673000	6282600	5938100	6958100	7086000	8474200	7049600	8747200	tr|A2RJS0|A2RJS0_LACLM3-hydroxy-3-methylglutarylcoenzymeAreductaseOS=Lactococcuslactissubsp.cremoris(strainMG1363)GN=mvaAPE=3SV=1	tr|A2RJS0|A2RJS0_LACLM3-hydroxy-3-methylglutarylcoenzymeAreductaseOS=Lactococcuslactissubsp.cremoris(strainMG1363)GN=mvaAPE=3SV=1
tr|A2RJS2|A2RJS2_LACLM	tr|A2RJS2|A2RJS2_LACLM	2	2	2	2	3	3	3	3	2	2	2	2	6	6	6	81	81	81	9.0035	0	8.5501	340690000	126	83258000	40189000	53108000	40363000	28695000	72556000	25560000	55565000	51705000	31473000	37234000	35710000	tr|A2RJS2|A2RJS2_LACLMUPF0109proteinllmg_0933OS=Lactococcuslactissubsp.cremoris(strainMG1363)GN=llmg_0933PE=3SV=1	tr|A2RJS2|A2RJS2_LACLMUPF0109proteinllmg_0933OS=Lactococcuslactissubsp.cremoris(strainMG1363)GN=llmg_0933PE=3SV=1
tr|A2RJS4|A2RJS4_LACLM	tr|A2RJS4|A2RJS4_LACLM	8	8	10	8	8	9	7	7	4	7	6	7	11	11	11	40.9	40.9	40.9	31.705	0	86.87	238330000	149	19286000	37764000	30849000	17154000	18866000	12446000	9907400	15801000	16286000	18360000	18513000	25187000	tr|A2RJS4|A2RJS4_LACLMUncharacterizedproteinOS=Lactococcuslactissubsp.cremoris(strainMG1363)GN=llmg_0935PE=4SV=1	tr|A2RJS4|A2RJS4_LACLMUncharacterizedproteinOS=Lactococcuslactissubsp.cremoris(strainMG1363)GN=llmg_0935PE=4SV=1
tr|A2RJS6|A2RJS6_LACLM	tr|A2RJS6|A2RJS6_LACLM	4	4	6	7	5	5	6	6	4	4	4	4	9	9	9	53	53	53	28.569	0	15.967	111350000	131	17968000	12835000	16714000	15290000	11751000	7879900	8122700	9677300	8117300	6301300	11123000	11303000	tr|A2RJS6|A2RJS6_LACLMtRNA(guanine-N(1)-)-methyltransferaseOS=Lactococcuslactissubsp.cremoris(strainMG1363)GN=trmDPE=3SV=1	tr|A2RJS6|A2RJS6_LACLMtRNA(guanine-N(1)-)-methyltransferaseOS=Lactococcuslactissubsp.cremoris(strainMG1363)GN=trmDPE=3SV=1
tr|A2RJS7|A2RJS7_LACLM	tr|A2RJS7|A2RJS7_LACLM	4	4	4	5	5	6	8	7	7	5	5	5	8	8	8	90	90	90	15.042	0	181.34	2532900000	853	189840000	169460000	168630000	473830000	594750000	1046500000	926760000	514910000	529800000	707450000	458120000	268280000	tr|A2RJS7|A2RJS7_LACLMUncharacterizedproteinOS=Lactococcuslactissubsp.cremoris(strainMG1363)GN=llmg_0938PE=4SV=1	tr|A2RJS7|A2RJS7_LACLMUncharacterizedproteinOS=Lactococcuslactissubsp.cremoris(strainMG1363)GN=llmg_0938PE=4SV=1
tr|A2RJS8|A2RJS8_LACLM	tr|A2RJS8|A2RJS8_LACLM	10	7	7	10	5	8	8	9	7	7	7	8	11	11	11	50.2	50.2	50.2	31.697	0	135.61	597740000	458	38351000	41766000	67568000	143020000	95451000	237500000	191770000	136420000	158240000	119730000	119570000	117870000	tr|A2RJS8|A2RJS8_LACLMUncharacterizedproteinOS=Lactococcuslactissubsp.cremoris(strainMG1363)GN=llmg_0939PE=4SV=1	tr|A2RJS8|A2RJS8_LACLMUncharacterizedproteinOS=Lactococcuslactissubsp.cremoris(strainMG1363)GN=llmg_0939PE=4SV=1
tr|A2RJT0|A2RJT0_LACLM	tr|A2RJT0|A2RJT0_LACLM	1	3	0	0	0	0	4	3	2	1	1	2	5	5	5	26.1	26.1	26.1	20.566	0	90.031	5457200	19	0	2290800	0	0	0	0	1148200	961450	1092100	0	0	1998400	tr|A2RJT0|A2RJT0_LACLMUncharacterizedproteinOS=Lactococcuslactissubsp.cremoris(strainMG1363)GN=llmg_0941PE=4SV=1	tr|A2RJT0|A2RJT0_LACLMUncharacterizedproteinOS=Lactococcuslactissubsp.cremoris(strainMG1363)GN=llmg_0941PE=4SV=1
tr|A2RJT2|A2RJT2_LACLM	tr|A2RJT2|A2RJT2_LACLM	25	22	16	21	17	16	15	18	19	16	20	16	28	28	27	54.9	54.9	53.4	53.822	0	192.38	2887000000	673	99605000	93212000	104740000	72561000	83113000	56984000	70233000	76275000	87555000	92477000	87141000	108270000	tr|A2RJT2|A2RJT2_LACLMPepDBproteinOS=Lactococcuslactissubsp.cremoris(strainMG1363)GN=pepDBPE=4SV=1	tr|A2RJT2|A2RJT2_LACLMPepDBproteinOS=Lactococcuslactissubsp.cremoris(strainMG1363)GN=pepDBPE=4SV=1
tr|A2RJT3|A2RJT3_LACLM	tr|A2RJT3|A2RJT3_LACLM	4	4	4	4	4	4	4	4	4	2	1	2	5	5	5	35.5	35.5	35.5	18.35	0	22.158	130760000	100	20597000	20366000	20782000	26586000	12684000	16157000	21414000	21177000	9423200	20634000	0	28358000	tr|A2RJT3|A2RJT3_LACLMUncharacterizedproteinOS=Lactococcuslactissubsp.cremoris(strainMG1363)GN=llmg_0944PE=4SV=1	tr|A2RJT3|A2RJT3_LACLMUncharacterizedproteinOS=Lactococcuslactissubsp.cremoris(strainMG1363)GN=llmg_0944PE=4SV=1
tr|A2RJT6|A2RJT6_LACLM	tr|A2RJT6|A2RJT6_LACLM	21	20	16	15	15	13	14	14	17	11	13	11	29	29	29	61.5	61.5	61.5	70.61	0	323.31	1508400000	268	38781000	31993000	33405000	42114000	28684000	30678000	45945000	36161000	29903000	23732000	41548000	25455000	tr|A2RJT6|A2RJT6_LACLMUncharacterizedproteinOS=Lactococcuslactissubsp.cremoris(strainMG1363)GN=llmg_0948PE=3SV=1	tr|A2RJT6|A2RJT6_LACLMUncharacterizedproteinOS=Lactococcuslactissubsp.cremoris(strainMG1363)GN=llmg_0948PE=3SV=1
tr|A2RJT8|A2RJT8_LACLM	tr|A2RJT8|A2RJT8_LACLM	1	0	1	1	2	1	4	4	3	1	1	3	4	4	4	25.1	25.1	25.1	21.291	0	4.8109	24959000	68	0	0	0	0	1623000	0	6442900	4432600	9077600	0	0	5651700	tr|A2RJT8|A2RJT8_LACLMPeptidemethioninesulfoxidereductaseMsrAOS=Lactococcuslactissubsp.cremoris(strainMG1363)GN=msrAPE=3SV=1	tr|A2RJT8|A2RJT8_LACLMPeptidemethioninesulfoxidereductaseMsrAOS=Lactococcuslactissubsp.cremoris(strainMG1363)GN=msrAPE=3SV=1
tr|A2RJU0|A2RJU0_LACLM	tr|A2RJU0|A2RJU0_LACLM	2	2	1	0	0	0	2	1	2	1	0	1	3	3	3	16.2	16.2	16.2	27.278	0	2.4635	6571500	29	875980	901490	0	0	0	0	433620	0	0	0	0	0	tr|A2RJU0|A2RJU0_LACLMUncharacterizedproteinOS=Lactococcuslactissubsp.cremoris(strainMG1363)GN=llmg_0953PE=4SV=1	tr|A2RJU0|A2RJU0_LACLMUncharacterizedproteinOS=Lactococcuslactissubsp.cremoris(strainMG1363)GN=llmg_0953PE=4SV=1
tr|A2RJU2|A2RJU2_LACLM	tr|A2RJU2|A2RJU2_LACLM	1	3	1	1	1	0	2	2	1	1	1	1	3	3	3	8.3	8.3	8.3	37.319	0	5.0949	2906000	7	0	0	0	0	0	0	403120	0	0	0	0	0	tr|A2RJU2|A2RJU2_LACLMUncharacterizedproteinOS=Lactococcuslactissubsp.cremoris(strainMG1363)GN=llmg_0955PE=3SV=1	tr|A2RJU2|A2RJU2_LACLMUncharacterizedproteinOS=Lactococcuslactissubsp.cremoris(strainMG1363)GN=llmg_0955PE=3SV=1
tr|A2RJU3|A2RJU3_LACLM	tr|A2RJU3|A2RJU3_LACLM	2	2	1	3	2	2	3	3	3	0	0	1	4	4	4	17.8	17.8	17.8	37.546	0	7.0288	8004000	17	1362700	2035800	0	1813000	1637200	2530400	3044700	2327900	2558500	0	0	0	tr|A2RJU3|A2RJU3_LACLMUncharacterizedproteinOS=Lactococcuslactissubsp.cremoris(strainMG1363)GN=llmg_0956PE=4SV=1	tr|A2RJU3|A2RJU3_LACLMUncharacterizedproteinOS=Lactococcuslactissubsp.cremoris(strainMG1363)GN=llmg_0956PE=4SV=1
tr|A2RJV1|A2RJV1_LACLM	tr|A2RJV1|A2RJV1_LACLM	10	9	11	10	8	7	7	8	7	8	8	10	15	15	15	59.9	59.9	59.9	32.577	0	131.79	1883400000	296	86210000	87086000	204370000	129860000	80262000	192650000	230960000	153360000	87202000	117650000	64824000	64502000	tr|A2RJV1|A2RJV1_LACLMThymidylatesynthaseOS=Lactococcuslactissubsp.cremoris(strainMG1363)GN=thyAPE=3SV=1	tr|A2RJV1|A2RJV1_LACLMThymidylatesynthaseOS=Lactococcuslactissubsp.cremoris(strainMG1363)GN=thyAPE=3SV=1
tr|A2RJV3|A2RJV3_LACLM	tr|A2RJV3|A2RJV3_LACLM	4	2	2	4	3	3	3	3	3	1	3	3	6	6	6	44.6	44.6	44.6	16.984	0	37.775	12941000	46	1642600	1893500	1702600	1706300	1533900	3081800	2788600	2748000	2231700	0	1565100	2067800	tr|A2RJV3|A2RJV3_LACLMRmaIproteinOS=Lactococcuslactissubsp.cremoris(strainMG1363)GN=rmaIPE=4SV=1	tr|A2RJV3|A2RJV3_LACLMRmaIproteinOS=Lactococcuslactissubsp.cremoris(strainMG1363)GN=rmaIPE=4SV=1
tr|A2RJV5|A2RJV5_LACLM	tr|A2RJV5|A2RJV5_LACLM	2	2	2	2	1	1	2	1	1	1	1	2	2	2	2	12.4	12.4	12.4	26.695	0	46.666	19059000	32	1969200	536360	1373700	1758900	0	0	1961300	0	0	0	0	1559300	tr|A2RJV5|A2RJV5_LACLMUncharacterizedproteinOS=Lactococcuslactissubsp.cremoris(strainMG1363)GN=llmg_0968PE=4SV=1	tr|A2RJV5|A2RJV5_LACLMUncharacterizedproteinOS=Lactococcuslactissubsp.cremoris(strainMG1363)GN=llmg_0968PE=4SV=1
tr|A2RJV6|A2RJV6_LACLM	tr|A2RJV6|A2RJV6_LACLM	2	0	0	1	0	0	1	0	0	0	1	0	4	4	4	28.7	28.7	28.7	14.319	0	5.5006	856230	5	407020	0	0	0	0	0	0	0	0	0	0	0	tr|A2RJV6|A2RJV6_LACLMUncharacterizedproteinOS=Lactococcuslactissubsp.cremoris(strainMG1363)GN=llmg_0969PE=4SV=1	tr|A2RJV6|A2RJV6_LACLMUncharacterizedproteinOS=Lactococcuslactissubsp.cremoris(strainMG1363)GN=llmg_0969PE=4SV=1
tr|A2RJW0|A2RJW0_LACLM	tr|A2RJW0|A2RJW0_LACLM	4	3	4	7	7	7	4	4	4	4	4	4	7	7	7	40.4	40.4	40.4	27.505	0	131.79	63357000	90	3027300	4474200	4208900	16602000	15279000	41047000	18473000	16503000	18343000	14228000	11384000	7691100	tr|A2RJW0|A2RJW0_LACLMPhosphoribosylaminoimidazole-succinocarboxamidesynthaseOS=Lactococcuslactissubsp.cremoris(strainMG1363)GN=purCPE=3SV=1	tr|A2RJW0|A2RJW0_LACLMPhosphoribosylaminoimidazole-succinocarboxamidesynthaseOS=Lactococcuslactissubsp.cremoris(strainMG1363)GN=purCPE=3SV=1
tr|A2RJW1|A2RJW1_LACLM	tr|A2RJW1|A2RJW1_LACLM	1	0	1	2	1	2	1	2	2	3	3	2	3	3	3	48.9	48.9	48.9	9.8741	0	19.861	3619300	43	0	0	0	2068300	0	3076600	0	0	3456800	1142500	1301200	1588500	tr|A2RJW1|A2RJW1_LACLMPhosphoribosylformylglycinamidinesynthasesubunitPurSOS=Lactococcuslactissubsp.cremoris(strainMG1363)GN=purSPE=3SV=1	tr|A2RJW1|A2RJW1_LACLMPhosphoribosylformylglycinamidinesynthasesubunitPurSOS=Lactococcuslactissubsp.cremoris(strainMG1363)GN=purSPE=3SV=1
tr|A2RJW2|A2RJW2_LACLM	tr|A2RJW2|A2RJW2_LACLM	2	2	1	2	2	2	4	3	5	3	3	3	5	5	5	26.5	26.5	26.5	24.737	0	49.205	20493000	57	1072700	2062900	0	5456200	3024300	3535500	2230200	3671500	5056000	4569900	2553600	6515300	tr|A2RJW2|A2RJW2_LACLMPhosphoribosylformylglycinamidinesynthasesubunitPurQOS=Lactococcuslactissubsp.cremoris(strainMG1363)GN=purQPE=3SV=1	tr|A2RJW2|A2RJW2_LACLMPhosphoribosylformylglycinamidinesynthasesubunitPurQOS=Lactococcuslactissubsp.cremoris(strainMG1363)GN=purQPE=3SV=1
tr|A2RJX7|A2RJX7_LACLM	tr|A2RJX7|A2RJX7_LACLM	2	2	2	1	0	0	1	1	1	0	0	0	2	2	2	14.8	14.8	14.8	20.768	0	7.092	24325000	17	892390	988450	1032100	0	0	0	0	0	0	0	0	0	tr|A2RJX7|A2RJX7_LACLMUncharacterizedproteinOS=Lactococcuslactissubsp.cremoris(strainMG1363)GN=llmg_0991PE=4SV=1	tr|A2RJX7|A2RJX7_LACLMUncharacterizedproteinOS=Lactococcuslactissubsp.cremoris(strainMG1363)GN=llmg_0991PE=4SV=1
tr|A2RJX9|A2RJX9_LACLM	tr|A2RJX9|A2RJX9_LACLM	7	9	7	6	6	4	8	8	7	4	6	7	10	10	10	50.6	50.6	50.6	20.273	0	76.219	87981000	232	8373300	22866000	31886000	14523000	12140000	10232000	13014000	16388000	15256000	4760800	14782000	38412000	tr|A2RJX9|A2RJX9_LACLMHprTproteinOS=Lactococcuslactissubsp.cremoris(strainMG1363)GN=hprTPE=4SV=1	tr|A2RJX9|A2RJX9_LACLMHprTproteinOS=Lactococcuslactissubsp.cremoris(strainMG1363)GN=hprTPE=4SV=1
tr|A2RJY1|A2RJY1_LACLM	tr|A2RJY1|A2RJY1_LACLM	8	4	8	8	7	5	9	8	8	6	7	8	10	10	10	76.1	76.1	76.1	26.436	0	224.83	684890000	199	81164000	33198000	83430000	120550000	98486000	149660000	122710000	76023000	59576000	54175000	111430000	55008000	tr|A2RJY1|A2RJY1_LACLMUncharacterizedproteinOS=Lactococcuslactissubsp.cremoris(strainMG1363)GN=llmg_0995PE=4SV=1	tr|A2RJY1|A2RJY1_LACLMUncharacterizedproteinOS=Lactococcuslactissubsp.cremoris(strainMG1363)GN=llmg_0995PE=4SV=1
tr|A2RJY3|A2RJY3_LACLM	tr|A2RJY3|A2RJY3_LACLM	1	2	1	3	3	3	3	5	5	2	3	3	6	6	6	29.8	29.8	29.8	24.096	0	10.684	42815000	54	0	2368900	0	13618000	6745500	6720600	9392500	10803000	11911000	9169700	12814000	14892000	tr|A2RJY3|A2RJY3_LACLMUncharacterizedproteinOS=Lactococcuslactissubsp.cremoris(strainMG1363)GN=llmg_0996PE=4SV=1	tr|A2RJY3|A2RJY3_LACLMUncharacterizedproteinOS=Lactococcuslactissubsp.cremoris(strainMG1363)GN=llmg_0996PE=4SV=1
tr|A2RJY4|A2RJY4_LACLM	tr|A2RJY4|A2RJY4_LACLM	2	2	0	4	5	3	5	5	4	0	3	1	9	9	9	30.8	30.8	30.8	44.157	0	9.594	7597900	32	0	0	0	1069900	915070	486040	1171800	1472600	1273100	0	0	0	tr|A2RJY4|A2RJY4_LACLMPhosphoribosylamine--glycineligaseOS=Lactococcuslactissubsp.cremoris(strainMG1363)GN=purDPE=3SV=1	tr|A2RJY4|A2RJY4_LACLMPhosphoribosylamine--glycineligaseOS=Lactococcuslactissubsp.cremoris(strainMG1363)GN=purDPE=3SV=1
tr|A2RJY6|A2RJY6_LACLM	tr|A2RJY6|A2RJY6_LACLM	2	2	2	2	2	2	2	2	2	1	1	2	2	2	2	16.1	16.1	16.1	16.99	0	72.451	10436000	37	1082400	1101500	1272100	1223400	1151400	1123900	1040000	1233000	1336400	0	0	0	tr|A2RJY6|A2RJY6_LACLMN5-carboxyaminoimidazoleribonucleotidemutaseOS=Lactococcuslactissubsp.cremoris(strainMG1363)GN=purEPE=3SV=1	tr|A2RJY6|A2RJY6_LACLMN5-carboxyaminoimidazoleribonucleotidemutaseOS=Lactococcuslactissubsp.cremoris(strainMG1363)GN=purEPE=3SV=1
tr|A2RJY7|A2RJY7_LACLM	tr|A2RJY7|A2RJY7_LACLM	2	2	2	2	1	2	1	1	2	2	2	2	3	3	3	11.7	11.7	11.7	41.092	0	4.6513	17710000	30	1222200	985940	3717300	0	0	6134900	0	0	7375400	2913900	1384600	11883000	tr|A2RJY7|A2RJY7_LACLMN5-carboxyaminoimidazoleribonucleotidesynthaseOS=Lactococcuslactissubsp.cremoris(strainMG1363)GN=purKPE=3SV=1	tr|A2RJY7|A2RJY7_LACLMN5-carboxyaminoimidazoleribonucleotidesynthaseOS=Lactococcuslactissubsp.cremoris(strainMG1363)GN=purKPE=3SV=1
tr|A2RK04|A2RK04_LACLM	tr|A2RK04|A2RK04_LACLM	10	9	7	6	5	7	5	4	7	4	5	2	11	11	11	77.7	77.7	77.7	15.968	0	116.96	125640000	149	8861700	11666000	12778000	5944800	6089100	9477900	4413200	8200400	4738400	6366900	3050100	1967200	tr|A2RK04|A2RK04_LACLMRmaEproteinOS=Lactococcuslactissubsp.cremoris(strainMG1363)GN=rmaEPE=4SV=1	tr|A2RK04|A2RK04_LACLMRmaEproteinOS=Lactococcuslactissubsp.cremoris(strainMG1363)GN=rmaEPE=4SV=1
tr|A2RK05|A2RK05_LACLM	tr|A2RK05|A2RK05_LACLM	5	4	4	4	4	2	6	5	6	3	2	7	9	9	9	44.8	44.8	44.8	28.363	0	44.617	51435000	74	2472800	4006500	2337400	2717500	2520900	5405100	1577600	3343700	2643500	6000600	6210200	3614900	tr|A2RK05|A2RK05_LACLMUncharacterizedproteinOS=Lactococcuslactissubsp.cremoris(strainMG1363)GN=llmg_1019PE=3SV=1	tr|A2RK05|A2RK05_LACLMUncharacterizedproteinOS=Lactococcuslactissubsp.cremoris(strainMG1363)GN=llmg_1019PE=3SV=1
tr|A2RK06|A2RK06_LACLM	tr|A2RK06|A2RK06_LACLM	3	5	2	2	3	1	2	1	1	2	1	0	6	6	6	38.9	38.9	38.9	16.863	0	7.9099	10509000	40	0	0	0	724970	1571100	0	0	0	0	1088400	0	0	tr|A2RK06|A2RK06_LACLMRmeBproteinOS=Lactococcuslactissubsp.cremoris(strainMG1363)GN=rmeBPE=4SV=1	tr|A2RK06|A2RK06_LACLMRmeBproteinOS=Lactococcuslactissubsp.cremoris(strainMG1363)GN=rmeBPE=4SV=1
tr|A2RK08|A2RK08_LACLM	tr|A2RK08|A2RK08_LACLM	3	0	3	4	3	1	2	1	3	3	3	2	5	5	5	43.8	43.8	43.8	14.685	0	12.377	18850000	77	0	0	5054600	13781000	8845600	0	4346400	0	7815300	10761000	7046000	13221000	tr|A2RK08|A2RK08_LACLMFurproteinOS=Lactococcuslactissubsp.cremoris(strainMG1363)GN=furPE=4SV=1	tr|A2RK08|A2RK08_LACLMFurproteinOS=Lactococcuslactissubsp.cremoris(strainMG1363)GN=furPE=4SV=1
tr|A2RK09|A2RK09_LACLM	tr|A2RK09|A2RK09_LACLM	6	6	6	5	5	4	7	5	6	5	3	4	8	8	8	25.3	25.3	25.3	24.318	0	32.58	244200000	106	20986000	18291000	20901000	6302300	8875300	10115000	8481700	17828000	15697000	12631000	14072000	35642000	tr|A2RK09|A2RK09_LACLMUncharacterizedproteinOS=Lactococcuslactissubsp.cremoris(strainMG1363)GN=llmg_1024PE=4SV=1	tr|A2RK09|A2RK09_LACLMUncharacterizedproteinOS=Lactococcuslactissubsp.cremoris(strainMG1363)GN=llmg_1024PE=4SV=1
tr|A2RK10|A2RK10_LACLM	tr|A2RK10|A2RK10_LACLM	8	8	7	7	6	5	7	5	6	5	6	6	10	10	10	32.7	32.7	32.7	24.423	0	35.794	501210000	328	165330000	70450000	58835000	55839000	51355000	103960000	42195000	51552000	41620000	69308000	161940000	92551000	tr|A2RK10|A2RK10_LACLMUncharacterizedproteinOS=Lactococcuslactissubsp.cremoris(strainMG1363)GN=llmg_1025PE=4SV=1	tr|A2RK10|A2RK10_LACLMUncharacterizedproteinOS=Lactococcuslactissubsp.cremoris(strainMG1363)GN=llmg_1025PE=4SV=1
tr|A2RK11|A2RK11_LACLM	tr|A2RK11|A2RK11_LACLM	2	2	2	2	2	2	3	3	2	2	2	3	4	4	4	24.3	24.3	24.3	29.34	0	9.6853	19813000	46	3385600	3426900	2223200	3288700	4105300	5092400	2511900	4961100	2789300	2278700	3338500	3403300	tr|A2RK11|A2RK11_LACLMUncharacterizedproteinOS=Lactococcuslactissubsp.cremoris(strainMG1363)GN=llmg_1026PE=4SV=1	tr|A2RK11|A2RK11_LACLMUncharacterizedproteinOS=Lactococcuslactissubsp.cremoris(strainMG1363)GN=llmg_1026PE=4SV=1
tr|A2RK12|A2RK12_LACLM	tr|A2RK12|A2RK12_LACLM	3	3	3	4	3	4	4	5	3	3	3	2	6	6	6	40.3	40.3	40.3	16.195	0	10.713	29426000	52	11872000	11897000	10116000	15866000	22378000	20693000	21588000	18229000	13560000	16588000	18082000	32327000	tr|A2RK12|A2RK12_LACLMRmaCproteinOS=Lactococcuslactissubsp.cremoris(strainMG1363)GN=rmaCPE=4SV=1	tr|A2RK12|A2RK12_LACLMRmaCproteinOS=Lactococcuslactissubsp.cremoris(strainMG1363)GN=rmaCPE=4SV=1
tr|A2RK13|A2RK13_LACLM	tr|A2RK13|A2RK13_LACLM	11	8	7	11	7	6	9	10	10	8	6	8	14	14	14	59.9	59.9	59.9	24.25	0	127.83	351360000	238	26065000	37821000	22690000	17139000	22332000	20428000	25543000	18801000	20532000	30968000	19192000	18898000	tr|A2RK13|A2RK13_LACLMUncharacterizedproteinOS=Lactococcuslactissubsp.cremoris(strainMG1363)GN=llmg_1028PE=4SV=1	tr|A2RK13|A2RK13_LACLMUncharacterizedproteinOS=Lactococcuslactissubsp.cremoris(strainMG1363)GN=llmg_1028PE=4SV=1
tr|A2RK15|A2RK15_LACLM	tr|A2RK15|A2RK15_LACLM	1	1	1	1	0	0	0	0	0	0	0	1	4	4	4	15.4	15.4	15.4	51.679	0.008	1.338	8948500	6	0	324140	0	0	0	0	0	0	0	0	0	0	tr|A2RK15|A2RK15_LACLMTrpEproteinOS=Lactococcuslactissubsp.cremoris(strainMG1363)GN=trpEPE=4SV=1	tr|A2RK15|A2RK15_LACLMTrpEproteinOS=Lactococcuslactissubsp.cremoris(strainMG1363)GN=trpEPE=4SV=1
tr|A2RK30|A2RK30_LACLM	tr|A2RK30|A2RK30_LACLM	6	4	4	6	5	5	8	6	6	4	5	5	9	9	9	52.9	52.9	52.9	23.133	0	83.631	79644000	184	4272800	6549700	6407900	7184100	6410500	13201000	8840800	9231400	10985000	10481000	8565800	8531900	tr|A2RK30|A2RK30_LACLMBusRproteinOS=Lactococcuslactissubsp.cremoris(strainMG1363)GN=busRPE=4SV=1	tr|A2RK30|A2RK30_LACLMBusRproteinOS=Lactococcuslactissubsp.cremoris(strainMG1363)GN=busRPE=4SV=1
tr|A2RK31|A2RK31_LACLM	tr|A2RK31|A2RK31_LACLM	26	27	18	19	17	22	17	14	18	16	18	19	29	29	29	78.1	78.1	78.1	45.696	0	323.31	2719000000	609	130210000	116210000	143080000	114190000	132170000	207620000	186840000	121100000	134850000	87708000	119990000	187190000	tr|A2RK31|A2RK31_LACLMBusAAproteinOS=Lactococcuslactissubsp.cremoris(strainMG1363)GN=busAAPE=3SV=1	tr|A2RK31|A2RK31_LACLMBusAAproteinOS=Lactococcuslactissubsp.cremoris(strainMG1363)GN=busAAPE=3SV=1
tr|A2RK32|A2RK32_LACLM	tr|A2RK32|A2RK32_LACLM	14	13	13	10	11	12	12	11	11	11	9	11	17	17	17	33.7	33.7	33.7	62.127	0	247.82	1595200000	388	44316000	46230000	52081000	22354000	32978000	54747000	35920000	36763000	37557000	40490000	30344000	54080000	tr|A2RK32|A2RK32_LACLMBusABproteinOS=Lactococcuslactissubsp.cremoris(strainMG1363)GN=busABPE=3SV=1	tr|A2RK32|A2RK32_LACLMBusABproteinOS=Lactococcuslactissubsp.cremoris(strainMG1363)GN=busABPE=3SV=1
tr|A2RK39|A2RK39_LACLM	tr|A2RK39|A2RK39_LACLM	2	2	2	3	3	2	2	2	2	3	3	2	4	4	4	11.8	11.8	11.8	34.646	0	3.0658	117060000	78	41621000	12429000	9345100	22248000	10370000	15819000	16418000	17230000	18738000	22982000	10598000	35622000	tr|A2RK39|A2RK39_LACLMUncharacterizedproteinOS=Lactococcuslactissubsp.cremoris(strainMG1363)GN=llmg_1056PE=4SV=1	tr|A2RK39|A2RK39_LACLMUncharacterizedproteinOS=Lactococcuslactissubsp.cremoris(strainMG1363)GN=llmg_1056PE=4SV=1
tr|A2RK42|A2RK42_LACLM	tr|A2RK42|A2RK42_LACLM	6	5	6	5	5	4	7	9	8	4	2	5	9	9	9	51	51	51	22.089	0	76.454	280630000	125	26866000	20518000	28433000	36890000	19578000	10713000	44213000	36527000	44574000	22453000	39913000	47440000	tr|A2RK42|A2RK42_LACLMRsmCproteinOS=Lactococcuslactissubsp.cremoris(strainMG1363)GN=rsmCPE=4SV=1	tr|A2RK42|A2RK42_LACLMRsmCproteinOS=Lactococcuslactissubsp.cremoris(strainMG1363)GN=rsmCPE=4SV=1
tr|A2RK43|A2RK43_LACLM	tr|A2RK43|A2RK43_LACLM	14	14	10	11	11	12	10	13	11	8	9	10	20	20	20	57.7	57.7	57.7	46.623	0	268.28	444560000	233	13274000	21710000	32116000	28286000	26665000	33027000	39280000	25370000	26197000	23278000	14190000	38349000	tr|A2RK43|A2RK43_LACLMPdpproteinOS=Lactococcuslactissubsp.cremoris(strainMG1363)GN=pdpPE=4SV=1	tr|A2RK43|A2RK43_LACLMPdpproteinOS=Lactococcuslactissubsp.cremoris(strainMG1363)GN=pdpPE=4SV=1
tr|A2RK46|A2RK46_LACLM	tr|A2RK46|A2RK46_LACLM	3	0	3	3	4	4	4	3	4	3	4	2	5	5	5	43.8	43.8	43.8	14	0	29.149	76356000	54	19640000	0	16949000	12169000	11250000	12210000	19719000	10887000	8635200	12274000	9508200	14287000	tr|A2RK46|A2RK46_LACLMCddproteinOS=Lactococcuslactissubsp.cremoris(strainMG1363)GN=cddPE=4SV=1	tr|A2RK46|A2RK46_LACLMCddproteinOS=Lactococcuslactissubsp.cremoris(strainMG1363)GN=cddPE=4SV=1
tr|A2RK47|A2RK47_LACLM	tr|A2RK47|A2RK47_LACLM	28	31	22	21	19	21	21	23	21	20	22	19	34	34	34	79.5	79.5	79.5	36.861	0	323.31	1825700000	1554	128260000	175950000	109740000	160370000	131430000	281810000	198090000	219730000	230430000	208150000	188840000	170630000	tr|A2RK47|A2RK47_LACLMBmpAproteinOS=Lactococcuslactissubsp.cremoris(strainMG1363)GN=bmpAPE=4SV=1	tr|A2RK47|A2RK47_LACLMBmpAproteinOS=Lactococcuslactissubsp.cremoris(strainMG1363)GN=bmpAPE=4SV=1
tr|A2RK48|A2RK48_LACLM	tr|A2RK48|A2RK48_LACLM	9	6	8	7	5	7	7	6	7	7	7	8	9	9	9	37	37	37	26.759	0	40.404	150590000	139	12741000	9743700	10914000	12043000	11513000	11365000	12466000	12810000	8917200	6404400	12829000	13630000	tr|A2RK48|A2RK48_LACLMRgrBproteinOS=Lactococcuslactissubsp.cremoris(strainMG1363)GN=rgrBPE=4SV=1	tr|A2RK48|A2RK48_LACLMRgrBproteinOS=Lactococcuslactissubsp.cremoris(strainMG1363)GN=rgrBPE=4SV=1
tr|A2RK50|A2RK50_LACLM	tr|A2RK50|A2RK50_LACLM	15	13	5	10	8	10	10	10	10	7	9	8	20	20	20	51.6	51.6	51.6	59.064	0	140.97	370050000	127	16511000	17041000	13776000	13270000	18923000	26435000	18864000	14358000	16469000	21273000	18642000	12654000	tr|A2RK50|A2RK50_LACLMHistidinekinaseOS=Lactococcuslactissubsp.cremoris(strainMG1363)GN=kinBPE=4SV=1	tr|A2RK50|A2RK50_LACLMHistidinekinaseOS=Lactococcuslactissubsp.cremoris(strainMG1363)GN=kinBPE=4SV=1
tr|A2RK51|A2RK51_LACLM	tr|A2RK51|A2RK51_LACLM	12	12	14	11	8	13	9	9	9	8	7	9	18	18	18	79.7	79.7	79.7	27.273	0	230.62	311830000	203	34979000	28263000	26725000	31515000	25382000	34593000	40794000	27945000	34018000	29180000	29271000	29530000	tr|A2RK51|A2RK51_LACLMLlrBproteinOS=Lactococcuslactissubsp.cremoris(strainMG1363)GN=llrBPE=4SV=1	tr|A2RK51|A2RK51_LACLMLlrBproteinOS=Lactococcuslactissubsp.cremoris(strainMG1363)GN=llrBPE=4SV=1
tr|A2RK61|A2RK61_LACLM	tr|A2RK61|A2RK61_LACLM	1	2	1	2	2	3	3	1	1	3	3	2	4	4	4	30	30	30	16.051	0	101.68	11110000	32	0	0	0	4078600	2397700	1561400	2451000	0	0	4516000	1358700	0	tr|A2RK61|A2RK61_LACLMUncharacterizedproteinOS=Lactococcuslactissubsp.cremoris(strainMG1363)GN=llmg_1077PE=4SV=1	tr|A2RK61|A2RK61_LACLMUncharacterizedproteinOS=Lactococcuslactissubsp.cremoris(strainMG1363)GN=llmg_1077PE=4SV=1
tr|A2RK64|A2RK64_LACLM	tr|A2RK64|A2RK64_LACLM	5	6	6	7	7	7	7	6	6	7	7	7	9	9	9	61.3	61.3	61.3	15.343	0	162.64	205300000	288	11530000	22873000	19155000	27822000	22664000	39599000	29000000	33621000	30266000	28857000	27710000	32275000	tr|A2RK64|A2RK64_LACLMUspA2proteinOS=Lactococcuslactissubsp.cremoris(strainMG1363)GN=uspA2PE=4SV=1	tr|A2RK64|A2RK64_LACLMUspA2proteinOS=Lactococcuslactissubsp.cremoris(strainMG1363)GN=uspA2PE=4SV=1
tr|A2RK69|A2RK69_LACLM	tr|A2RK69|A2RK69_LACLM	4	4	1	3	5	2	6	5	7	2	3	7	11	11	11	40.7	40.7	40.7	28.119	0	29.784	27417000	53	2074600	3068000	0	3383100	3561100	2876200	2028800	2429000	2364900	1982600	3435000	3938100	tr|A2RK69|A2RK69_LACLMUncharacterizedproteinOS=Lactococcuslactissubsp.cremoris(strainMG1363)GN=llmg_1085PE=4SV=1	tr|A2RK69|A2RK69_LACLMUncharacterizedproteinOS=Lactococcuslactissubsp.cremoris(strainMG1363)GN=llmg_1085PE=4SV=1
tr|A2RK70|A2RK70_LACLM	tr|A2RK70|A2RK70_LACLM	35	37	31	34	29	33	38	34	33	35	37	36	50	50	50	56.9	56.9	56.9	95.955	0	323.31	1630000000	2254	257780000	231240000	176750000	194810000	282550000	138490000	163990000	216220000	116640000	145610000	201440000	253720000	tr|A2RK70|A2RK70_LACLMUncharacterizedproteinOS=Lactococcuslactissubsp.cremoris(strainMG1363)GN=llmg_1086PE=4SV=1	tr|A2RK70|A2RK70_LACLMUncharacterizedproteinOS=Lactococcuslactissubsp.cremoris(strainMG1363)GN=llmg_1086PE=4SV=1
tr|A2RK71|A2RK71_LACLM	tr|A2RK71|A2RK71_LACLM	1	0	1	1	0	0	1	1	2	2	0	1	3	3	3	22	22	22	23.819	0	46.592	2916600	12	0	0	0	0	0	0	0	0	883280	683900	0	0	tr|A2RK71|A2RK71_LACLMAcmCproteinOS=Lactococcuslactissubsp.cremoris(strainMG1363)GN=acmCPE=4SV=1	tr|A2RK71|A2RK71_LACLMAcmCproteinOS=Lactococcuslactissubsp.cremoris(strainMG1363)GN=acmCPE=4SV=1
tr|A2RK77|A2RK77_LACLM	tr|A2RK77|A2RK77_LACLM	1	3	1	2	1	1	1	1	1	0	0	0	4	4	4	11.4	11.4	11.4	37.644	0.0027229	2.0018	28875000	10	0	1659800	0	0	0	0	0	0	0	0	0	0	tr|A2RK77|A2RK77_LACLMUncharacterizedproteinOS=Lactococcuslactissubsp.cremoris(strainMG1363)GN=llmg_1093PE=4SV=1	tr|A2RK77|A2RK77_LACLMUncharacterizedproteinOS=Lactococcuslactissubsp.cremoris(strainMG1363)GN=llmg_1093PE=4SV=1
tr|A2RK80|A2RK80_LACLM	tr|A2RK80|A2RK80_LACLM	1	1	1	1	1	2	2	2	3	2	1	2	3	3	3	7.2	7.2	7.2	44.033	0	6.6712	382780000	23	0	0	0	0	0	0	262080000	0	388440000	0	0	0	tr|A2RK80|A2RK80_LACLMUncharacterizedproteinOS=Lactococcuslactissubsp.cremoris(strainMG1363)GN=llmg_1096PE=4SV=1	tr|A2RK80|A2RK80_LACLMUncharacterizedproteinOS=Lactococcuslactissubsp.cremoris(strainMG1363)GN=llmg_1096PE=4SV=1
tr|A2RK83|A2RK83_LACLM	tr|A2RK83|A2RK83_LACLM	1	1	2	2	1	1	2	3	4	1	1	1	6	6	6	19.8	19.8	19.8	55.679	0	3.0863	10040000	19	0	0	0	0	0	0	2696900	2753000	4514400	0	0	0	tr|A2RK83|A2RK83_LACLMGlycerolkinaseOS=Lactococcuslactissubsp.cremoris(strainMG1363)GN=glpKPE=3SV=1	tr|A2RK83|A2RK83_LACLMGlycerolkinaseOS=Lactococcuslactissubsp.cremoris(strainMG1363)GN=glpKPE=3SV=1
tr|A2RK84|A2RK84_LACLM	tr|A2RK84|A2RK84_LACLM	6	8	7	3	3	4	8	6	5	3	2	5	10	10	10	54.8	54.8	54.8	20.246	0	65.848	72656000	102	15579000	13651000	21591000	3913400	8418700	5876300	5908000	4934900	4824600	1840300	4700400	7437200	tr|A2RK84|A2RK84_LACLMPseudouridinesynthaseOS=Lactococcuslactissubsp.cremoris(strainMG1363)GN=rluCPE=3SV=1	tr|A2RK84|A2RK84_LACLMPseudouridinesynthaseOS=Lactococcuslactissubsp.cremoris(strainMG1363)GN=rluCPE=3SV=1
tr|A2RK85|A2RK85_LACLM	tr|A2RK85|A2RK85_LACLM	3	1	1	3	2	2	3	3	3	2	1	1	3	3	3	11.5	11.5	11.5	29.309	0	20.304	11061000	22	1204400	0	0	387130	696340	511930	906630	1081600	1031200	1512900	0	0	tr|A2RK85|A2RK85_LACLMUncharacterizedproteinOS=Lactococcuslactissubsp.cremoris(strainMG1363)GN=llmg_1101PE=4SV=1	tr|A2RK85|A2RK85_LACLMUncharacterizedproteinOS=Lactococcuslactissubsp.cremoris(strainMG1363)GN=llmg_1101PE=4SV=1
tr|A2RK86|A2RK86_LACLM	tr|A2RK86|A2RK86_LACLM	2	2	1	0	0	0	0	1	2	1	0	0	4	4	4	12.5	12.5	12.5	43.204	0	4.5858	10520000	8	0	0	0	0	0	0	0	0	766370	0	0	0	tr|A2RK86|A2RK86_LACLMUncharacterizedproteinOS=Lactococcuslactissubsp.cremoris(strainMG1363)GN=llmg_1102PE=4SV=1	tr|A2RK86|A2RK86_LACLMUncharacterizedproteinOS=Lactococcuslactissubsp.cremoris(strainMG1363)GN=llmg_1102PE=4SV=1
tr|A2RK87|A2RK87_LACLM	tr|A2RK87|A2RK87_LACLM	11	13	10	14	11	9	11	12	12	11	13	8	17	17	17	61.3	61.3	61.3	43.912	0	285.86	521660000	282	45438000	47019000	44273000	53443000	46328000	41722000	33380000	35650000	47117000	60932000	70333000	51683000	tr|A2RK87|A2RK87_LACLMUncharacterizedproteinOS=Lactococcuslactissubsp.cremoris(strainMG1363)GN=llmg_1103PE=4SV=1	tr|A2RK87|A2RK87_LACLMUncharacterizedproteinOS=Lactococcuslactissubsp.cremoris(strainMG1363)GN=llmg_1103PE=4SV=1
tr|A2RK94|A2RK94_LACLM	tr|A2RK94|A2RK94_LACLM	7	12	6	8	8	8	4	3	6	5	6	5	14	14	14	42.3	42.3	42.3	35.569	0	84.155	123630000	109	12374000	12931000	18068000	12429000	8783200	14343000	14074000	7233500	8779500	12875000	9551400	10002000	tr|A2RK94|A2RK94_LACLMIspBproteinOS=Lactococcuslactissubsp.cremoris(strainMG1363)GN=ispBPE=3SV=1	tr|A2RK94|A2RK94_LACLMIspBproteinOS=Lactococcuslactissubsp.cremoris(strainMG1363)GN=ispBPE=3SV=1
tr|A2RK96|A2RK96_LACLM	tr|A2RK96|A2RK96_LACLM	1	2	0	0	0	0	2	4	3	1	0	1	4	4	4	19.3	19.3	19.3	15.263	0	3.6109	5444600	12	0	0	0	0	0	0	665410	1128400	632260	0	0	0	tr|A2RK96|A2RK96_LACLMUncharacterizedproteinOS=Lactococcuslactissubsp.cremoris(strainMG1363)GN=llmg_1112PE=4SV=1	tr|A2RK96|A2RK96_LACLMUncharacterizedproteinOS=Lactococcuslactissubsp.cremoris(strainMG1363)GN=llmg_1112PE=4SV=1
tr|A2RK97|A2RK97_LACLM	tr|A2RK97|A2RK97_LACLM	27	29	21	22	18	23	19	22	17	16	18	17	30	30	30	89.5	89.5	89.5	35.002	0	323.31	7840900000	1382	896440000	1111100000	797600000	882810000	590680000	918150000	568610000	635960000	467060000	500750000	861060000	474800000	tr|A2RK97|A2RK97_LACLMUTP--glucose-1-phosphateuridylyltransferaseOS=Lactococcuslactissubsp.cremoris(strainMG1363)GN=galUPE=3SV=1	tr|A2RK97|A2RK97_LACLMUTP--glucose-1-phosphateuridylyltransferaseOS=Lactococcuslactissubsp.cremoris(strainMG1363)GN=galUPE=3SV=1
tr|A2RK99|A2RK99_LACLM	tr|A2RK99|A2RK99_LACLM	9	8	8	12	11	12	13	12	12	11	10	13	17	17	17	56.7	56.7	56.7	24.351	0	131.74	555350000	463	86261000	53698000	70432000	62332000	46648000	81202000	100670000	71469000	87224000	107660000	96739000	99474000	tr|A2RK99|A2RK99_LACLMUncharacterizedproteinOS=Lactococcuslactissubsp.cremoris(strainMG1363)GN=llmg_1115PE=4SV=1	tr|A2RK99|A2RK99_LACLMUncharacterizedproteinOS=Lactococcuslactissubsp.cremoris(strainMG1363)GN=llmg_1115PE=4SV=1
tr|A2RKA0|A2RKA0_LACLM	tr|A2RKA0|A2RKA0_LACLM	30	30	29	27	27	25	25	25	23	19	24	23	38	38	38	87.8	87.8	87.8	44.295	0	323.31	2700100000	855	110440000	68726000	141780000	126780000	122710000	100670000	144300000	128130000	134050000	105590000	125290000	173350000	tr|A2RKA0|A2RKA0_LACLMTelA1proteinOS=Lactococcuslactissubsp.cremoris(strainMG1363)GN=telA1PE=4SV=1	tr|A2RKA0|A2RKA0_LACLMTelA1proteinOS=Lactococcuslactissubsp.cremoris(strainMG1363)GN=telA1PE=4SV=1
tr|A2RKA1|A2RKA1_LACLM	tr|A2RKA1|A2RKA1_LACLM	13	15	8	8	5	6	6	6	5	7	8	8	16	16	16	42.1	42.1	42.1	41.161	0	139.76	564600000	152	25950000	20005000	38266000	37699000	21495000	17672000	8855900	16446000	22233000	22176000	29445000	24077000	tr|A2RKA1|A2RKA1_LACLMN-acetylglucosamine-6-phosphatedeacetylaseOS=Lactococcuslactissubsp.cremoris(strainMG1363)GN=nagAPE=3SV=1	tr|A2RKA1|A2RKA1_LACLMN-acetylglucosamine-6-phosphatedeacetylaseOS=Lactococcuslactissubsp.cremoris(strainMG1363)GN=nagAPE=3SV=1
tr|A2RKA3|A2RKA3_LACLM	tr|A2RKA3|A2RKA3_LACLM	38	38	38	33	36	32	31	34	33	32	31	27	43	43	43	91	91	91	54.285	0	323.31	98701000000	14598	4798100000	4213100000	5122800000	4321900000	6977800000	12574000000	7006600000	5184100000	5130600000	5384400000	5758900000	4011900000	tr|A2RKA3|A2RKA3_LACLMPyruvatekinaseOS=Lactococcuslactissubsp.cremoris(strainMG1363)GN=pykPE=3SV=1	tr|A2RKA3|A2RKA3_LACLMPyruvatekinaseOS=Lactococcuslactissubsp.cremoris(strainMG1363)GN=pykPE=3SV=1
tr|A2RKA4|A2RKA4_LACLM	tr|A2RKA4|A2RKA4_LACLM	23	24	22	20	20	18	19	19	17	17	19	15	25	25	25	77.5	77.5	77.5	35.05	0	323.31	20573000000	5943	1853100000	2526200000	1841400000	3760700000	2712000000	4837200000	2836000000	2499200000	2700200000	2228500000	2714300000	2009400000	tr|A2RKA4|A2RKA4_LACLML-lactatedehydrogenaseOS=Lactococcuslactissubsp.cremoris(strainMG1363)GN=ldhPE=3SV=1	tr|A2RKA4|A2RKA4_LACLML-lactatedehydrogenaseOS=Lactococcuslactissubsp.cremoris(strainMG1363)GN=ldhPE=3SV=1
tr|A2RKA5|A2RKA5_LACLM	tr|A2RKA5|A2RKA5_LACLM	1	1	1	0	0	0	2	3	2	1	1	2	4	4	4	24.9	24.9	24.9	33.551	0	11.413	45805000	16	0	0	0	0	0	0	562130	0	1014500	0	0	0	tr|A2RKA5|A2RKA5_LACLMNupCproteinOS=Lactococcuslactissubsp.cremoris(strainMG1363)GN=nupCPE=4SV=1	tr|A2RKA5|A2RKA5_LACLMNupCproteinOS=Lactococcuslactissubsp.cremoris(strainMG1363)GN=nupCPE=4SV=1
tr|A2RKA6|A2RKA6_LACLM	tr|A2RKA6|A2RKA6_LACLM	4	4	2	2	2	3	2	2	3	3	4	4	4	4	4	12.6	12.6	12.6	38.875	0	115.28	120720000	291	15421000	14799000	12564000	4996600	6549900	9667700	10632000	10020000	14569000	9431000	11576000	14320000	tr|A2RKA6|A2RKA6_LACLMNupBproteinOS=Lactococcuslactissubsp.cremoris(strainMG1363)GN=nupBPE=4SV=1	tr|A2RKA6|A2RKA6_LACLMNupBproteinOS=Lactococcuslactissubsp.cremoris(strainMG1363)GN=nupBPE=4SV=1
tr|A2RKA7|A2RKA7_LACLM	tr|A2RKA7|A2RKA7_LACLM	30	31	28	29	32	24	26	28	28	24	28	22	37	37	37	73.1	73.1	73.1	55.543	0	323.31	3111800000	871	158420000	150900000	153490000	116520000	153230000	132670000	76328000	122130000	119880000	163280000	123410000	156370000	tr|A2RKA7|A2RKA7_LACLMNupAproteinOS=Lactococcuslactissubsp.cremoris(strainMG1363)GN=nupAPE=3SV=1	tr|A2RKA7|A2RKA7_LACLMNupAproteinOS=Lactococcuslactissubsp.cremoris(strainMG1363)GN=nupAPE=3SV=1
tr|A2RKA8|A2RKA8_LACLM	tr|A2RKA8|A2RKA8_LACLM	5	2	4	4	4	3	5	4	5	4	7	7	11	11	11	33.9	33.9	33.9	30.891	0	45.971	17648000	58	4827100	0	3055200	2367600	4006000	3180500	2481100	2695400	2698800	2321700	3370200	3800800	tr|A2RKA8|A2RKA8_LACLMUncharacterizedproteinOS=Lactococcuslactissubsp.cremoris(strainMG1363)GN=llmg_1124PE=4SV=1	tr|A2RKA8|A2RKA8_LACLMUncharacterizedproteinOS=Lactococcuslactissubsp.cremoris(strainMG1363)GN=llmg_1124PE=4SV=1
tr|A2RKA9|A2RKA9_LACLM	tr|A2RKA9|A2RKA9_LACLM	21	23	12	12	11	10	16	16	13	7	12	12	28	28	28	55.7	55.7	55.7	61.439	0	310.58	1117100000	238	25024000	26272000	27533000	32679000	27872000	35551000	34698000	31681000	34166000	20836000	24323000	36495000	tr|A2RKA9|A2RKA9_LACLMFbpAproteinOS=Lactococcuslactissubsp.cremoris(strainMG1363)GN=fbpAPE=4SV=1	tr|A2RKA9|A2RKA9_LACLMFbpAproteinOS=Lactococcuslactissubsp.cremoris(strainMG1363)GN=fbpAPE=4SV=1
tr|A2RKB0|A2RKB0_LACLM	tr|A2RKB0|A2RKB0_LACLM	3	3	4	2	1	2	2	1	2	2	2	2	4	4	4	18.4	18.4	18.4	16.735	0	7.8912	60277000	45	8906900	5933000	2898200	8150100	0	5800800	4605100	0	7039900	5213300	6846500	9116800	tr|A2RKB0|A2RKB0_LACLMUncharacterizedproteinOS=Lactococcuslactissubsp.cremoris(strainMG1363)GN=llmg_1126PE=4SV=1	tr|A2RKB0|A2RKB0_LACLMUncharacterizedproteinOS=Lactococcuslactissubsp.cremoris(strainMG1363)GN=llmg_1126PE=4SV=1
tr|A2RKB5|A2RKB5_LACLM	tr|A2RKB5|A2RKB5_LACLM	6	9	4	5	4	3	4	6	6	4	4	2	10	10	10	44.6	44.6	44.6	34.362	0	101.03	278490000	72	13233000	52155000	15757000	14907000	10913000	22222000	31123000	20534000	19773000	22718000	22450000	20948000	tr|A2RKB5|A2RKB5_LACLM2-dehydropantoate2-reductaseOS=Lactococcuslactissubsp.cremoris(strainMG1363)GN=panEPE=3SV=1	tr|A2RKB5|A2RKB5_LACLM2-dehydropantoate2-reductaseOS=Lactococcuslactissubsp.cremoris(strainMG1363)GN=panEPE=3SV=1
tr|A2RKB6|A2RKB6_LACLM	tr|A2RKB6|A2RKB6_LACLM	2	3	3	2	1	1	1	2	1	0	1	1	6	6	6	15.6	15.6	15.6	44.717	0	42.836	11619000	20	0	888830	866260	0	0	0	0	0	0	0	0	0	tr|A2RKB6|A2RKB6_LACLMSbcDproteinOS=Lactococcuslactissubsp.cremoris(strainMG1363)GN=sbcDPE=4SV=1	tr|A2RKB6|A2RKB6_LACLMSbcDproteinOS=Lactococcuslactissubsp.cremoris(strainMG1363)GN=sbcDPE=4SV=1
tr|A2RKB7|A2RKB7_LACLM	tr|A2RKB7|A2RKB7_LACLM	18	17	17	29	22	19	29	21	29	31	21	21	45	45	45	48.3	48.3	48.3	120.29	0	323.31	243130000	383	42168000	34215000	40891000	26992000	30617000	33330000	37337000	38256000	36195000	48197000	30816000	36082000	tr|A2RKB7|A2RKB7_LACLMSbcCproteinOS=Lactococcuslactissubsp.cremoris(strainMG1363)GN=sbcCPE=4SV=1	tr|A2RKB7|A2RKB7_LACLMSbcCproteinOS=Lactococcuslactissubsp.cremoris(strainMG1363)GN=sbcCPE=4SV=1
tr|A2RKB8|A2RKB8_LACLM	tr|A2RKB8|A2RKB8_LACLM	3	2	2	0	0	0	0	0	0	2	2	2	4	4	4	51.3	51.3	51.3	8.8461	0	15.564	31435000	14	0	0	0	0	0	0	0	0	0	5576700	3104200	4347700	tr|A2RKB8|A2RKB8_LACLMUncharacterizedproteinOS=Lactococcuslactissubsp.cremoris(strainMG1363)GN=llmg_1134PE=4SV=1	tr|A2RKB8|A2RKB8_LACLMUncharacterizedproteinOS=Lactococcuslactissubsp.cremoris(strainMG1363)GN=llmg_1134PE=4SV=1
tr|A2RKB9|A2RKB9_LACLM	tr|A2RKB9|A2RKB9_LACLM	2	3	2	2	3	2	3	2	2	2	2	2	4	4	4	40.9	40.9	40.9	15.511	0	41.996	49385000	103	8707300	11842000	17101000	9475400	8561800	16243000	23238000	9549600	9412700	6155500	5158800	5443100	tr|A2RKB9|A2RKB9_LACLMUncharacterizedproteinOS=Lactococcuslactissubsp.cremoris(strainMG1363)GN=llmg_1135PE=4SV=1	tr|A2RKB9|A2RKB9_LACLMUncharacterizedproteinOS=Lactococcuslactissubsp.cremoris(strainMG1363)GN=llmg_1135PE=4SV=1
tr|A2RKC0|A2RKC0_LACLM	tr|A2RKC0|A2RKC0_LACLM	9	8	7	8	8	9	9	8	7	8	8	9	12	12	12	52.3	52.3	52.3	26.744	0	95.087	254850000	176	24434000	23325000	24685000	15926000	12966000	6793700	14527000	14428000	11725000	14852000	17756000	21685000	tr|A2RKC0|A2RKC0_LACLMMtsBproteinOS=Lactococcuslactissubsp.cremoris(strainMG1363)GN=mtsBPE=3SV=1	tr|A2RKC0|A2RKC0_LACLMMtsBproteinOS=Lactococcuslactissubsp.cremoris(strainMG1363)GN=mtsBPE=3SV=1
tr|A2RKC2|A2RKC2_LACLM	tr|A2RKC2|A2RKC2_LACLM	10	13	8	6	5	4	5	10	8	6	6	6	17	17	17	57.5	57.5	57.5	35.747	0	82.427	98594000	109	3439200	16834000	5997800	13429000	6878900	8787900	7170700	11475000	13436000	8211000	11240000	7327300	tr|A2RKC2|A2RKC2_LACLMMtsAproteinOS=Lactococcuslactissubsp.cremoris(strainMG1363)GN=mtsAPE=3SV=1	tr|A2RKC2|A2RKC2_LACLMMtsAproteinOS=Lactococcuslactissubsp.cremoris(strainMG1363)GN=mtsAPE=3SV=1
tr|A2RKC4|A2RKC4_LACLM	tr|A2RKC4|A2RKC4_LACLM	0	1	0	1	1	1	1	2	2	1	0	1	3	3	3	8.6	8.6	8.6	47.409	0.0027322	2.1041	5137300	14	0	0	0	0	0	0	0	0	0	2692000	0	0	tr|A2RKC4|A2RKC4_LACLMUncharacterizedproteinOS=Lactococcuslactissubsp.cremoris(strainMG1363)GN=llmg_1140PE=4SV=1	tr|A2RKC4|A2RKC4_LACLMUncharacterizedproteinOS=Lactococcuslactissubsp.cremoris(strainMG1363)GN=llmg_1140PE=4SV=1
tr|A2RKD4|A2RKD4_LACLM	tr|A2RKD4|A2RKD4_LACLM	1	2	3	1	0	1	4	5	0	1	1	0	7	7	7	41.9	41.9	41.9	29.413	0	11.27	588040000	38	0	59527000	102970000	0	0	0	124960000	220130000	0	0	0	0	tr|A2RKD4|A2RKD4_LACLMUncharacterizedproteinOS=Lactococcuslactissubsp.cremoris(strainMG1363)GN=llmg_1150PE=4SV=1	tr|A2RKD4|A2RKD4_LACLMUncharacterizedproteinOS=Lactococcuslactissubsp.cremoris(strainMG1363)GN=llmg_1150PE=4SV=1
tr|A2RKD5|A2RKD5_LACLM	tr|A2RKD5|A2RKD5_LACLM	10	10	7	4	3	5	6	6	8	1	2	3	12	12	12	31.7	31.7	31.7	53.482	0	74.342	109410000	45	9026200	9912600	11161000	8068000	8108600	15496000	17932000	14161000	14825000	0	12003000	7192100	tr|A2RKD5|A2RKD5_LACLMUncharacterizedproteinOS=Lactococcuslactissubsp.cremoris(strainMG1363)GN=llmg_1151PE=4SV=1	tr|A2RKD5|A2RKD5_LACLMUncharacterizedproteinOS=Lactococcuslactissubsp.cremoris(strainMG1363)GN=llmg_1151PE=4SV=1
tr|A2RKD8|A2RKD8_LACLM	tr|A2RKD8|A2RKD8_LACLM	10	9	8	6	5	3	5	4	4	3	1	2	13	13	13	20.9	20.9	20.9	71.742	0	19.617	1157500000	40	26256000	21724000	64406000	12344000	17558000	21832000	31495000	21730000	16746000	15117000	0	27074000	tr|A2RKD8|A2RKD8_LACLMPabBproteinOS=Lactococcuslactissubsp.cremoris(strainMG1363)GN=pabBPE=4SV=1	tr|A2RKD8|A2RKD8_LACLMPabBproteinOS=Lactococcuslactissubsp.cremoris(strainMG1363)GN=pabBPE=4SV=1
tr|A2RKD9|A2RKD9_LACLM	tr|A2RKD9|A2RKD9_LACLM	1	0	1	3	3	3	5	3	4	3	4	4	5	5	5	37.4	37.4	37.4	14.491	0	33.568	11045000	54	0	0	0	3331300	1588100	3025900	3941900	5814100	3612500	6684700	7195200	8270600	tr|A2RKD9|A2RKD9_LACLMGlutaminaseOS=Lactococcuslactissubsp.cremoris(strainMG1363)GN=yneHPE=4SV=1	tr|A2RKD9|A2RKD9_LACLMGlutaminaseOS=Lactococcuslactissubsp.cremoris(strainMG1363)GN=yneHPE=4SV=1
tr|A2RKE0|A2RKE0_LACLM	tr|A2RKE0|A2RKE0_LACLM	2	2	2	2	2	2	3	3	3	2	2	2	3	3	3	43.5	43.5	43.5	12.365	0	33.857	183300000	46	25827000	31839000	26664000	4286100	9849600	10427000	6076500	13013000	9266700	3206300	9738100	11370000	tr|A2RKE0|A2RKE0_LACLMGlutaminaseOS=Lactococcuslactissubsp.cremoris(strainMG1363)GN=yneGPE=4SV=1	tr|A2RKE0|A2RKE0_LACLMGlutaminaseOS=Lactococcuslactissubsp.cremoris(strainMG1363)GN=yneGPE=4SV=1
tr|A2RKF4|A2RKF4_LACLM	tr|A2RKF4|A2RKF4_LACLM	7	7	5	6	5	4	4	4	5	2	4	3	9	9	9	23.9	23.9	23.9	52.261	0	26.987	102610000	61	2889300	3785000	3128200	2987400	3309700	2739300	3517400	2832500	3044800	2164700	2307900	3217400	tr|A2RKF4|A2RKF4_LACLMUncharacterizedproteinOS=Lactococcuslactissubsp.cremoris(strainMG1363)GN=llmg_1171PE=4SV=1	tr|A2RKF4|A2RKF4_LACLMUncharacterizedproteinOS=Lactococcuslactissubsp.cremoris(strainMG1363)GN=llmg_1171PE=4SV=1
tr|A2RKF5|A2RKF5_LACLM	tr|A2RKF5|A2RKF5_LACLM	3	2	1	1	1	2	4	3	2	2	2	4	6	6	6	22.9	22.9	22.9	28.56	0	15.099	12810000	26	0	0	0	0	0	0	1218200	1378000	1878500	1713000	2405100	3104300	tr|A2RKF5|A2RKF5_LACLMRdrBproteinOS=Lactococcuslactissubsp.cremoris(strainMG1363)GN=rdrBPE=4SV=1	tr|A2RKF5|A2RKF5_LACLMRdrBproteinOS=Lactococcuslactissubsp.cremoris(strainMG1363)GN=rdrBPE=4SV=1
tr|A2RKF7|A2RKF7_LACLM	tr|A2RKF7|A2RKF7_LACLM	1	2	2	1	1	1	2	2	2	1	1	1	2	2	2	12.2	12.2	12.2	21.402	0	13.715	7412400	27	0	1441000	1973700	0	0	0	1171600	1102900	1125500	0	0	0	tr|A2RKF7|A2RKF7_LACLMUncharacterizedproteinOS=Lactococcuslactissubsp.cremoris(strainMG1363)GN=llmg_1174PE=4SV=1	tr|A2RKF7|A2RKF7_LACLMUncharacterizedproteinOS=Lactococcuslactissubsp.cremoris(strainMG1363)GN=llmg_1174PE=4SV=1
tr|A2RKF8|A2RKF8_LACLM	tr|A2RKF8|A2RKF8_LACLM	9	7	8	7	6	7	11	10	10	7	7	6	16	16	16	57.1	57.1	57.1	32.186	0	102.12	412850000	194	82011000	65637000	47581000	34823000	63495000	51029000	37491000	33177000	48154000	30951000	55232000	41974000	tr|A2RKF8|A2RKF8_LACLMRibosomebiogenesisGTPaseAOS=Lactococcuslactissubsp.cremoris(strainMG1363)GN=llmg_1175PE=3SV=1	tr|A2RKF8|A2RKF8_LACLMRibosomebiogenesisGTPaseAOS=Lactococcuslactissubsp.cremoris(strainMG1363)GN=llmg_1175PE=3SV=1
tr|A2RKG3|A2RKG3_LACLM	tr|A2RKG3|A2RKG3_LACLM	6	4	4	3	3	3	6	5	5	3	3	5	7	7	7	31	31	31	27.535	0	80.458	74484000	121	6519800	4647100	5197500	1461600	6137400	10862000	4338600	6851300	8133800	8704300	6695800	8916200	tr|A2RKG3|A2RKG3_LACLMUncharacterizedproteinOS=Lactococcuslactissubsp.cremoris(strainMG1363)GN=llmg_1180PE=4SV=1	tr|A2RKG3|A2RKG3_LACLMUncharacterizedproteinOS=Lactococcuslactissubsp.cremoris(strainMG1363)GN=llmg_1180PE=4SV=1
tr|A2RKG4|A2RKG4_LACLM	tr|A2RKG4|A2RKG4_LACLM	7	12	4	11	7	8	7	12	10	5	9	5	14	14	14	55.3	55.3	55.3	36.944	0	169.6	297310000	240	35575000	33890000	30245000	35518000	35579000	28207000	24075000	35109000	38434000	23677000	28869000	33205000	tr|A2RKG4|A2RKG4_LACLMBranched-chain-amino-acidaminotransferaseOS=Lactococcuslactissubsp.cremoris(strainMG1363)GN=ilvEPE=3SV=1	tr|A2RKG4|A2RKG4_LACLMBranched-chain-amino-acidaminotransferaseOS=Lactococcuslactissubsp.cremoris(strainMG1363)GN=ilvEPE=3SV=1
tr|A2RKG6|A2RKG6_LACLM	tr|A2RKG6|A2RKG6_LACLM	12	11	9	16	6	15	15	12	18	15	13	14	30	30	30	23.2	23.2	23.2	164.27	0	161	559250000	232	105770000	66834000	93378000	138190000	69085000	100960000	50939000	81641000	99289000	65082000	58707000	90111000	tr|A2RKG6|A2RKG6_LACLMGltBproteinOS=Lactococcuslactissubsp.cremoris(strainMG1363)GN=gltBPE=4SV=1	tr|A2RKG6|A2RKG6_LACLMGltBproteinOS=Lactococcuslactissubsp.cremoris(strainMG1363)GN=gltBPE=4SV=1
tr|A2RKG8|A2RKG8_LACLM	tr|A2RKG8|A2RKG8_LACLM	18	19	14	12	10	10	14	14	12	10	15	12	20	20	20	54.7	54.7	54.7	47.282	0	194.18	2006800000	471	78108000	71556000	88697000	70728000	89430000	87030000	105580000	73259000	81385000	76225000	80917000	78859000	tr|A2RKG8|A2RKG8_LACLMDiaminopimelatedecarboxylaseOS=Lactococcuslactissubsp.cremoris(strainMG1363)GN=lysAPE=3SV=1	tr|A2RKG8|A2RKG8_LACLMDiaminopimelatedecarboxylaseOS=Lactococcuslactissubsp.cremoris(strainMG1363)GN=lysAPE=3SV=1
tr|A2RKH1|A2RKH1_LACLM	tr|A2RKH1|A2RKH1_LACLM	10	10	10	7	8	7	10	9	10	7	8	9	11	11	11	54.7	54.7	54.7	22.432	0	212.41	996470000	394	63596000	82918000	121800000	65911000	34126000	55494000	39977000	49365000	55884000	56535000	41257000	44872000	tr|A2RKH1|A2RKH1_LACLMNon-canonicalpurineNTPpyrophosphataseOS=Lactococcuslactissubsp.cremoris(strainMG1363)GN=llmg_1188PE=3SV=1	tr|A2RKH1|A2RKH1_LACLMNon-canonicalpurineNTPpyrophosphataseOS=Lactococcuslactissubsp.cremoris(strainMG1363)GN=llmg_1188PE=3SV=1
tr|A2RKH2|A2RKH2_LACLM	tr|A2RKH2|A2RKH2_LACLM	2	3	3	2	2	2	2	2	2	2	2	2	3	3	3	21.6	21.6	21.6	19.007	0	19.344	47205000	132	8372900	8382000	6040300	8995300	6065900	8476000	9853700	6460000	8136000	5518300	3498600	3466300	tr|A2RKH2|A2RKH2_LACLMPhosphoesteraseOS=Lactococcuslactissubsp.cremoris(strainMG1363)GN=llmg_1189PE=3SV=1	tr|A2RKH2|A2RKH2_LACLMPhosphoesteraseOS=Lactococcuslactissubsp.cremoris(strainMG1363)GN=llmg_1189PE=3SV=1
tr|A2RKH3|A2RKH3_LACLM	tr|A2RKH3|A2RKH3_LACLM	2	3	3	1	1	1	2	2	1	0	1	1	5	5	5	27.5	27.5	27.5	17.923	0	3.3199	9720400	17	3473900	1580500	4651900	0	0	0	0	0	0	0	0	0	tr|A2RKH3|A2RKH3_LACLMUncharacterizedproteinOS=Lactococcuslactissubsp.cremoris(strainMG1363)GN=llmg_1190PE=4SV=1	tr|A2RKH3|A2RKH3_LACLMUncharacterizedproteinOS=Lactococcuslactissubsp.cremoris(strainMG1363)GN=llmg_1190PE=4SV=1
tr|A2RKH7|A2RKH7_LACLM	tr|A2RKH7|A2RKH7_LACLM	11	12	12	12	10	14	14	13	13	10	9	9	16	16	16	56.8	56.8	56.8	28.77	0	271.97	468760000	593	34676000	34612000	50321000	50368000	43543000	41922000	53539000	49007000	65233000	62316000	49440000	54158000	tr|A2RKH7|A2RKH7_LACLMPseudouridinesynthaseOS=Lactococcuslactissubsp.cremoris(strainMG1363)GN=rluBPE=3SV=1	tr|A2RKH7|A2RKH7_LACLMPseudouridinesynthaseOS=Lactococcuslactissubsp.cremoris(strainMG1363)GN=rluBPE=3SV=1
tr|A2RKI4|A2RKI4_LACLM	tr|A2RKI4|A2RKI4_LACLM	1	1	0	2	6	5	3	6	3	6	3	6	10	10	10	18.5	18.5	18.5	68.303	0	36.277	5582100	47	0	0	0	1198100	5929600	4754400	811360	4696900	1166100	2134600	1639700	2232100	tr|A2RKI4|A2RKI4_LACLMUncharacterizedproteinOS=Lactococcuslactissubsp.cremoris(strainMG1363)GN=llmg_1202PE=3SV=1	tr|A2RKI4|A2RKI4_LACLMUncharacterizedproteinOS=Lactococcuslactissubsp.cremoris(strainMG1363)GN=llmg_1202PE=3SV=1
tr|A2RKI6|A2RKI6_LACLM	tr|A2RKI6|A2RKI6_LACLM	7	6	4	6	5	3	3	5	3	6	3	3	8	8	8	31	31	31	28.697	0	38.602	62726000	72	11453000	8285200	8176700	4679100	3093400	1901800	1434400	3164000	2504800	2732100	1992500	2753400	tr|A2RKI6|A2RKI6_LACLMHdiRproteinOS=Lactococcuslactissubsp.cremoris(strainMG1363)GN=hdiRPE=4SV=1	tr|A2RKI6|A2RKI6_LACLMHdiRproteinOS=Lactococcuslactissubsp.cremoris(strainMG1363)GN=hdiRPE=4SV=1
tr|A2RKJ8|A2RKJ8_LACLM	tr|A2RKJ8|A2RKJ8_LACLM	21	21	16	15	17	14	17	20	16	12	18	9	23	23	23	50.3	50.3	50.3	55.961	0	213.44	1146000000	320	25871000	29579000	38001000	21896000	36804000	47707000	49081000	30874000	31123000	50301000	32160000	42494000	tr|A2RKJ8|A2RKJ8_LACLMD-alanine--poly(phosphoribitol)ligasesubunit1OS=Lactococcuslactissubsp.cremoris(strainMG1363)GN=dltAPE=3SV=1	tr|A2RKJ8|A2RKJ8_LACLMD-alanine--poly(phosphoribitol)ligasesubunit1OS=Lactococcuslactissubsp.cremoris(strainMG1363)GN=dltAPE=3SV=1
tr|A2RKK1|A2RKK1_LACLM	tr|A2RKK1|A2RKK1_LACLM	11	13	10	10	8	8	8	8	9	4	6	5	16	16	16	47.4	47.4	47.4	48.695	0	211.39	308160000	135	9194400	13501000	13378000	8541300	8080800	3284400	9665900	10854000	10194000	12708000	7607000	22060000	tr|A2RKK1|A2RKK1_LACLMDltDproteinOS=Lactococcuslactissubsp.cremoris(strainMG1363)GN=dltDPE=4SV=1	tr|A2RKK1|A2RKK1_LACLMDltDproteinOS=Lactococcuslactissubsp.cremoris(strainMG1363)GN=dltDPE=4SV=1
tr|A2RKK2|A2RKK2_LACLM	tr|A2RKK2|A2RKK2_LACLM	6	11	7	16	15	15	13	16	13	18	14	19	24	24	24	28.8	28.8	28.8	100.55	0	323.31	144760000	489	20778000	20256000	20955000	29124000	20021000	40236000	20512000	30579000	28355000	20499000	22047000	29142000	tr|A2RKK2|A2RKK2_LACLMMgtAproteinOS=Lactococcuslactissubsp.cremoris(strainMG1363)GN=mgtAPE=3SV=1	tr|A2RKK2|A2RKK2_LACLMMgtAproteinOS=Lactococcuslactissubsp.cremoris(strainMG1363)GN=mgtAPE=3SV=1
tr|A2RKK3|A2RKK3_LACLM	tr|A2RKK3|A2RKK3_LACLM	8	5	5	6	6	6	7	7	6	5	5	7	11	11	11	52.1	52.1	52.1	24.997	0	94.53	102400000	183	7040100	10015000	7196200	6623400	9810300	6130200	8371700	6776300	9017500	7278100	9893700	14029000	tr|A2RKK3|A2RKK3_LACLMUncharacterizedproteinOS=Lactococcuslactissubsp.cremoris(strainMG1363)GN=llmg_1224PE=4SV=1	tr|A2RKK3|A2RKK3_LACLMUncharacterizedproteinOS=Lactococcuslactissubsp.cremoris(strainMG1363)GN=llmg_1224PE=4SV=1
tr|A2RKK6|A2RKK6_LACLM	tr|A2RKK6|A2RKK6_LACLM	1	5	2	4	3	3	3	3	4	2	2	1	14	8	8	38.8	28.8	28.8	38.677	0	60.943	30982000	41	0	3636800	3207500	1747200	4530200	1222100	1781600	2196300	1658100	2694900	1475200	0	tr|A2RKK6|A2RKK6_LACLMPhospho-2-dehydro-3-deoxyheptonatealdolaseOS=Lactococcuslactissubsp.cremoris(strainMG1363)GN=aroHPE=3SV=1	tr|A2RKK6|A2RKK6_LACLMPhospho-2-dehydro-3-deoxyheptonatealdolaseOS=Lactococcuslactissubsp.cremoris(strainMG1363)GN=aroHPE=3SV=1
tr|A2RKL8|A2RKL8_LACLM	tr|A2RKL8|A2RKL8_LACLM	2	0	1	4	4	5	3	3	4	4	4	3	5	5	5	51.5	51.5	51.5	7.1988	0	15.802	60153000	76	12256000	0	0	11940000	7188900	13782000	9994900	6074100	10324000	7250200	13615000	25540000	tr|A2RKL8|A2RKL8_LACLMCspDproteinOS=Lactococcuslactissubsp.cremoris(strainMG1363)GN=cspD2PE=4SV=1	tr|A2RKL8|A2RKL8_LACLMCspDproteinOS=Lactococcuslactissubsp.cremoris(strainMG1363)GN=cspD2PE=4SV=1
tr|A2RKM6|A2RKM6_LACLM	tr|A2RKM6|A2RKM6_LACLM	2	3	3	3	2	1	2	3	2	2	3	3	4	4	4	55.7	55.7	55.7	14.274	0	78.928	13873000	46	2669600	2592300	1964400	4045100	2033000	0	3888200	4923200	4203600	3530300	2949400	2078700	tr|A2RKM6|A2RKM6_LACLMArsDproteinOS=Lactococcuslactissubsp.cremoris(strainMG1363)GN=arsDPE=4SV=1	tr|A2RKM6|A2RKM6_LACLMArsDproteinOS=Lactococcuslactissubsp.cremoris(strainMG1363)GN=arsDPE=4SV=1
tr|A2RKM7|A2RKM7_LACLM	tr|A2RKM7|A2RKM7_LACLM	11	11	6	3	2	2	2	2	2	1	2	1	11	11	11	27.7	27.7	27.7	63.396	0	64.283	182770000	28	2712100	2252900	2082800	1462000	2717400	1023700	1337700	1803500	1733600	0	1335600	0	tr|A2RKM7|A2RKM7_LACLMArsAproteinOS=Lactococcuslactissubsp.cremoris(strainMG1363)GN=arsAPE=4SV=1	tr|A2RKM7|A2RKM7_LACLMArsAproteinOS=Lactococcuslactissubsp.cremoris(strainMG1363)GN=arsAPE=4SV=1
tr|A2RKM8|A2RKM8_LACLM	tr|A2RKM8|A2RKM8_LACLM	2	2	3	0	0	0	2	2	2	0	1	0	5	5	5	10.3	10.3	10.3	60.707	0	13.893	22140000	12	0	0	0	0	0	0	381680	514950	445220	0	0	0	tr|A2RKM8|A2RKM8_LACLMUncharacterizedproteinOS=Lactococcuslactissubsp.cremoris(strainMG1363)GN=llmg_1249PE=4SV=1	tr|A2RKM8|A2RKM8_LACLMUncharacterizedproteinOS=Lactococcuslactissubsp.cremoris(strainMG1363)GN=llmg_1249PE=4SV=1
tr|A2RKP8|A2RKP8_LACLM	tr|A2RKP8|A2RKP8_LACLM	2	1	0	2	1	1	1	2	2	3	4	2	5	5	5	43.2	43.2	43.2	11.145	0	30.19	2357500	32	0	0	0	0	0	0	0	0	0	1880900	1282400	2606100	tr|A2RKP8|A2RKP8_LACLMUncharacterizedproteinOS=Lactococcuslactissubsp.cremoris(strainMG1363)GN=llmg_1269PE=4SV=1	tr|A2RKP8|A2RKP8_LACLMUncharacterizedproteinOS=Lactococcuslactissubsp.cremoris(strainMG1363)GN=llmg_1269PE=4SV=1
tr|A2RKQ1|A2RKQ1_LACLM	tr|A2RKQ1|A2RKQ1_LACLM	38	40	27	19	21	18	21	21	20	20	22	16	47	47	47	57.8	57.8	57.8	80.485	0	305.79	3687200000	638	64718000	65219000	60509000	36135000	42429000	58117000	55903000	62938000	51721000	62241000	45371000	55267000	tr|A2RKQ1|A2RKQ1_LACLMDNAtopoisomerase1OS=Lactococcuslactissubsp.cremoris(strainMG1363)GN=topAPE=3SV=1	tr|A2RKQ1|A2RKQ1_LACLMDNAtopoisomerase1OS=Lactococcuslactissubsp.cremoris(strainMG1363)GN=topAPE=3SV=1
tr|A2RKQ3|A2RKQ3_LACLM	tr|A2RKQ3|A2RKQ3_LACLM	3	1	2	2	2	2	3	2	2	4	3	3	5	5	5	43.7	43.7	43.7	13.674	0	102.03	17628000	60	2931000	0	1825700	3634000	2155100	2735900	2451400	1983700	2990300	3291100	2615500	2671600	tr|A2RKQ3|A2RKQ3_LACLMAldRproteinOS=Lactococcuslactissubsp.cremoris(strainMG1363)GN=aldRPE=4SV=1	tr|A2RKQ3|A2RKQ3_LACLMAldRproteinOS=Lactococcuslactissubsp.cremoris(strainMG1363)GN=aldRPE=4SV=1
tr|A2RKT1|A2RKT1_LACLM	tr|A2RKT1|A2RKT1_LACLM	31	33	27	20	22	18	25	29	28	19	26	15	46	46	46	62.1	62.1	62.1	75.593	0	306.21	2760200000	571	97094000	89462000	85627000	68306000	73326000	72943000	84456000	78363000	79187000	72023000	83999000	81889000	tr|A2RKT1|A2RKT1_LACLMRibonucleaseROS=Lactococcuslactissubsp.cremoris(strainMG1363)GN=vacB2PE=3SV=1	tr|A2RKT1|A2RKT1_LACLMRibonucleaseROS=Lactococcuslactissubsp.cremoris(strainMG1363)GN=vacB2PE=3SV=1
tr|A2RKT5|A2RKT5_LACLM	tr|A2RKT5|A2RKT5_LACLM	25	29	26	20	20	21	23	23	22	16	21	16	29	29	29	66.6	66.6	66.6	60.778	0	323.31	9747800000	1382	308920000	206970000	235180000	237780000	182770000	291310000	376260000	218260000	185980000	148770000	120510000	153860000	tr|A2RKT5|A2RKT5_LACLMAlsproteinOS=Lactococcuslactissubsp.cremoris(strainMG1363)GN=alsPE=3SV=1	tr|A2RKT5|A2RKT5_LACLMAlsproteinOS=Lactococcuslactissubsp.cremoris(strainMG1363)GN=alsPE=3SV=1
tr|A2RKT6|A2RKT6_LACLM	tr|A2RKT6|A2RKT6_LACLM	8	6	7	9	4	6	8	6	8	5	7	6	13	13	13	47.4	47.4	47.4	48.108	0	220.6	376900000	158	37389000	35555000	19009000	55822000	20704000	79625000	60292000	34577000	32487000	36361000	39550000	24119000	tr|A2RKT6|A2RKT6_LACLMUncharacterizedproteinOS=Lactococcuslactissubsp.cremoris(strainMG1363)GN=llmg_1310PE=4SV=1	tr|A2RKT6|A2RKT6_LACLMUncharacterizedproteinOS=Lactococcuslactissubsp.cremoris(strainMG1363)GN=llmg_1310PE=4SV=1
tr|A2RKT7|A2RKT7_LACLM	tr|A2RKT7|A2RKT7_LACLM	6	5	3	4	1	4	5	5	5	7	4	4	8	8	8	20.8	20.8	20.8	43.689	0	40.155	229970000	132	11005000	8085800	12381000	6801700	0	6611000	6386000	8526700	9220000	21170000	10521000	13529000	tr|A2RKT7|A2RKT7_LACLMUncharacterizedproteinOS=Lactococcuslactissubsp.cremoris(strainMG1363)GN=llmg_1311PE=4SV=1	tr|A2RKT7|A2RKT7_LACLMUncharacterizedproteinOS=Lactococcuslactissubsp.cremoris(strainMG1363)GN=llmg_1311PE=4SV=1
tr|A2RKT8|A2RKT8_LACLM	tr|A2RKT8|A2RKT8_LACLM	0	2	1	2	1	1	1	0	1	2	3	3	4	4	4	23.3	23.3	23.3	24.267	0.00069061	2.3897	39266000	13	0	0	0	0	0	0	0	0	0	1017800	1064000	1068000	tr|A2RKT8|A2RKT8_LACLMUncharacterizedproteinOS=Lactococcuslactissubsp.cremoris(strainMG1363)GN=llmg_1313PE=4SV=1	tr|A2RKT8|A2RKT8_LACLMUncharacterizedproteinOS=Lactococcuslactissubsp.cremoris(strainMG1363)GN=llmg_1313PE=4SV=1
tr|A2RKT9|A2RKT9_LACLM	tr|A2RKT9|A2RKT9_LACLM	19	19	13	17	15	15	16	14	16	8	15	8	24	24	24	54	54	54	58.526	0	323.31	1998900000	396	60271000	31388000	58369000	86003000	58707000	114310000	101930000	81032000	75454000	42772000	62364000	74772000	tr|A2RKT9|A2RKT9_LACLMUncharacterizedproteinOS=Lactococcuslactissubsp.cremoris(strainMG1363)GN=llmg_1314PE=4SV=1	tr|A2RKT9|A2RKT9_LACLMUncharacterizedproteinOS=Lactococcuslactissubsp.cremoris(strainMG1363)GN=llmg_1314PE=4SV=1
tr|A2RKU0|A2RKU0_LACLM	tr|A2RKU0|A2RKU0_LACLM	25	25	21	21	17	20	19	22	19	15	16	16	31	31	31	66.7	66.7	66.7	52.03	0	323.31	1568700000	568	60194000	67368000	71032000	69155000	55297000	77127000	64206000	69943000	63478000	47564000	56371000	42333000	tr|A2RKU0|A2RKU0_LACLMUncharacterizedproteinOS=Lactococcuslactissubsp.cremoris(strainMG1363)GN=llmg_1315PE=4SV=1	tr|A2RKU0|A2RKU0_LACLMUncharacterizedproteinOS=Lactococcuslactissubsp.cremoris(strainMG1363)GN=llmg_1315PE=4SV=1
tr|A2RKU1|A2RKU1_LACLM	tr|A2RKU1|A2RKU1_LACLM	3	3	2	2	2	1	3	1	1	3	2	2	8	8	8	24.9	24.9	24.9	30.64	0	4.4401	6233000	20	1205600	1224700	0	0	0	0	0	0	0	756600	0	0	tr|A2RKU1|A2RKU1_LACLMUncharacterizedproteinOS=Lactococcuslactissubsp.cremoris(strainMG1363)GN=llmg_1316PE=4SV=1	tr|A2RKU1|A2RKU1_LACLMUncharacterizedproteinOS=Lactococcuslactissubsp.cremoris(strainMG1363)GN=llmg_1316PE=4SV=1
tr|A2RKV0|A2RKV0_LACLM	tr|A2RKV0|A2RKV0_LACLM	6	11	9	10	6	7	5	8	7	5	8	4	12	12	12	49.9	49.9	49.9	40.572	0	323.31	103520000	139	5525600	7506500	8115400	7951100	8024800	7373000	7527000	7435200	7406700	8147400	5685600	8267300	tr|A2RKV0|A2RKV0_LACLMPotDproteinOS=Lactococcuslactissubsp.cremoris(strainMG1363)GN=potDPE=4SV=1	tr|A2RKV0|A2RKV0_LACLMPotDproteinOS=Lactococcuslactissubsp.cremoris(strainMG1363)GN=potDPE=4SV=1
tr|A2RKV1|A2RKV1_LACLM	tr|A2RKV1|A2RKV1_LACLM	0	0	0	1	0	1	0	1	1	1	1	1	2	2	2	6.4	6.4	6.4	29.528	0	9.5969	1503700	10	0	0	0	0	0	0	0	0	0	0	1678000	0	tr|A2RKV1|A2RKV1_LACLMPotCproteinOS=Lactococcuslactissubsp.cremoris(strainMG1363)GN=potCPE=3SV=1	tr|A2RKV1|A2RKV1_LACLMPotCproteinOS=Lactococcuslactissubsp.cremoris(strainMG1363)GN=potCPE=3SV=1
tr|A2RKV3|A2RKV3_LACLM	tr|A2RKV3|A2RKV3_LACLM	15	15	11	11	9	12	12	13	13	10	11	10	20	20	20	54.2	54.2	54.2	48.271	0	323.31	1477500000	352	21050000	31591000	58186000	39534000	44411000	23768000	20576000	25455000	20823000	59338000	38603000	64654000	tr|A2RKV3|A2RKV3_LACLMSpermidine/putrescineimportATP-bindingproteinPotAOS=Lactococcuslactissubsp.cremoris(strainMG1363)GN=potAPE=3SV=1	tr|A2RKV3|A2RKV3_LACLMSpermidine/putrescineimportATP-bindingproteinPotAOS=Lactococcuslactissubsp.cremoris(strainMG1363)GN=potAPE=3SV=1
tr|A2RKV7|A2RKV7_LACLM	tr|A2RKV7|A2RKV7_LACLM	13	13	11	9	10	9	11	9	11	7	9	8	16	16	16	43.9	43.9	43.9	46.629	0	323.31	703020000	258	34154000	31957000	37928000	32849000	30930000	25735000	23540000	30899000	39626000	33231000	26192000	31366000	tr|A2RKV7|A2RKV7_LACLMHomoserinedehydrogenaseOS=Lactococcuslactissubsp.cremoris(strainMG1363)GN=homPE=3SV=1	tr|A2RKV7|A2RKV7_LACLMHomoserinedehydrogenaseOS=Lactococcuslactissubsp.cremoris(strainMG1363)GN=homPE=3SV=1
tr|A2RKV8|A2RKV8_LACLM	tr|A2RKV8|A2RKV8_LACLM	2	1	3	4	3	3	7	6	7	5	4	4	7	7	7	53.8	53.8	53.8	24.738	0	72.717	153730000	55	20098000	0	36040000	13830000	11900000	19292000	12846000	21985000	25554000	27961000	24781000	33689000	tr|A2RKV8|A2RKV8_LACLMDukBproteinOS=Lactococcuslactissubsp.cremoris(strainMG1363)GN=dukBPE=4SV=1	tr|A2RKV8|A2RKV8_LACLMDukBproteinOS=Lactococcuslactissubsp.cremoris(strainMG1363)GN=dukBPE=4SV=1
tr|A2RKV9|A2RKV9_LACLM	tr|A2RKV9|A2RKV9_LACLM	9	13	5	7	6	4	6	6	7	4	8	4	16	16	16	37	37	37	47.933	0	68.46	104440000	107	6369700	7066600	4113200	5003900	4172300	7921600	8694700	6485600	4635300	6317900	4916200	4279500	tr|A2RKV9|A2RKV9_LACLMFolCproteinOS=Lactococcuslactissubsp.cremoris(strainMG1363)GN=folCPE=3SV=1	tr|A2RKV9|A2RKV9_LACLMFolCproteinOS=Lactococcuslactissubsp.cremoris(strainMG1363)GN=folCPE=3SV=1
tr|A2RKW1|A2RKW1_LACLM	tr|A2RKW1|A2RKW1_LACLM	12	15	10	11	11	10	9	9	11	9	10	9	21	21	21	65.8	65.8	65.8	40.329	0	179.74	169400000	198	12775000	11980000	10801000	16034000	15216000	25976000	28112000	19976000	20885000	20448000	15952000	19595000	tr|A2RKW1|A2RKW1_LACLMFolPproteinOS=Lactococcuslactissubsp.cremoris(strainMG1363)GN=folPPE=4SV=1	tr|A2RKW1|A2RKW1_LACLMFolPproteinOS=Lactococcuslactissubsp.cremoris(strainMG1363)GN=folPPE=4SV=1
tr|A2RKW3|A2RKW3_LACLM	tr|A2RKW3|A2RKW3_LACLM	1	2	2	4	5	4	6	7	6	3	3	4	8	8	8	56.9	56.9	56.9	12.961	0	56.363	94047000	160	13439000	16155000	16877000	65014000	39439000	21429000	34003000	29967000	37811000	30926000	42263000	40484000	tr|A2RKW3|A2RKW3_LACLMFolBproteinOS=Lactococcuslactissubsp.cremoris(strainMG1363)GN=folBPE=4SV=1	tr|A2RKW3|A2RKW3_LACLMFolBproteinOS=Lactococcuslactissubsp.cremoris(strainMG1363)GN=folBPE=4SV=1
tr|A2RKW6|A2RKW6_LACLM	tr|A2RKW6|A2RKW6_LACLM	7	10	9	4	3	2	11	9	10	4	5	7	14	14	14	75.6	75.6	75.6	19.803	0	98.03	75703000	369	5843300	23048000	6790200	8270100	5412100	7576500	10375000	11162000	11096000	9868900	9432700	11534000	tr|A2RKW6|A2RKW6_LACLMDihydrofolatereductaseOS=Lactococcuslactissubsp.cremoris(strainMG1363)GN=dfrAPE=3SV=1	tr|A2RKW6|A2RKW6_LACLMDihydrofolatereductaseOS=Lactococcuslactissubsp.cremoris(strainMG1363)GN=dfrAPE=3SV=1
tr|A2RKW9|A2RKW9_LACLM	tr|A2RKW9|A2RKW9_LACLM	2	2	2	0	0	0	0	0	0	1	0	1	3	3	3	5.5	5.5	5.5	46.223	0	6.6182	10340000	24	2509300	1036300	1468400	0	0	0	0	0	0	0	0	0	tr|A2RKW9|A2RKW9_LACLMPbuXproteinOS=Lactococcuslactissubsp.cremoris(strainMG1363)GN=pbuXPE=4SV=1	tr|A2RKW9|A2RKW9_LACLMPbuXproteinOS=Lactococcuslactissubsp.cremoris(strainMG1363)GN=pbuXPE=4SV=1
tr|A2RKX1|A2RKX1_LACLM	tr|A2RKX1|A2RKX1_LACLM	6	4	7	2	2	8	3	3	4	4	5	4	8	8	8	66	66	66	10.774	0	152.73	28004000	173	5669800	4304000	5243500	2984900	822760	6007900	1488300	2844700	5321300	4621600	7230400	5370800	tr|A2RKX1|A2RKX1_LACLMORF59OS=Lactococcuslactissubsp.cremoris(strainMG1363)GN=llmg_1347PE=4SV=1	tr|A2RKX1|A2RKX1_LACLMORF59OS=Lactococcuslactissubsp.cremoris(strainMG1363)GN=llmg_1347PE=4SV=1
tr|A2RKX2|A2RKX2_LACLM	tr|A2RKX2|A2RKX2_LACLM	7	8	5	3	4	8	7	7	4	5	5	3	11	11	11	73.6	73.6	73.6	14.079	0	65.135	275800000	187	30174000	27875000	22486000	26614000	16025000	27207000	25439000	19388000	21396000	21129000	17352000	28693000	tr|A2RKX2|A2RKX2_LACLMORF46OS=Lactococcuslactissubsp.cremoris(strainMG1363)GN=llmg_1348PE=4SV=1	tr|A2RKX2|A2RKX2_LACLMORF46OS=Lactococcuslactissubsp.cremoris(strainMG1363)GN=llmg_1348PE=4SV=1
tr|A2RKX3|A2RKX3_LACLM	tr|A2RKX3|A2RKX3_LACLM	1	1	1	0	1	1	1	0	1	2	1	2	3	3	3	9.8	9.8	9.8	39.042	0	6.8049	61091000	118	0	5828500	0	0	0	0	0	0	0	0	0	0	tr|A2RKX3|A2RKX3_LACLMORF57OS=Lactococcuslactissubsp.cremoris(strainMG1363)GN=llmg_1349PE=4SV=1	tr|A2RKX3|A2RKX3_LACLMORF57OS=Lactococcuslactissubsp.cremoris(strainMG1363)GN=llmg_1349PE=4SV=1
tr|A2RKX4|A2RKX4_LACLM	tr|A2RKX4|A2RKX4_LACLM	12	12	11	12	10	10	12	10	12	10	9	9	13	13	13	65.4	65.4	65.4	21.591	0	231.58	1746600000	1207	182520000	66890000	198720000	154080000	99630000	139900000	167870000	145450000	109890000	137400000	77463000	91041000	tr|A2RKX4|A2RKX4_LACLMTelCOS=Lactococcuslactissubsp.cremoris(strainMG1363)GN=telCPE=4SV=1	tr|A2RKX4|A2RKX4_LACLMTelCOS=Lactococcuslactissubsp.cremoris(strainMG1363)GN=telCPE=4SV=1
tr|A2RKX5|A2RKX5_LACLM	tr|A2RKX5|A2RKX5_LACLM	11	8	7	9	6	7	10	10	9	6	8	8	13	13	13	72.8	72.8	72.8	21.141	0	220.14	974340000	663	79608000	124160000	69193000	46512000	118610000	69195000	42890000	42922000	38475000	106180000	58084000	66587000	tr|A2RKX5|A2RKX5_LACLMTelBOS=Lactococcuslactissubsp.cremoris(strainMG1363)GN=telBPE=4SV=1	tr|A2RKX5|A2RKX5_LACLMTelBOS=Lactococcuslactissubsp.cremoris(strainMG1363)GN=telBPE=4SV=1
tr|A2RKX6|A2RKX6_LACLM	tr|A2RKX6|A2RKX6_LACLM	18	16	17	18	16	16	17	18	16	14	17	14	19	19	19	83.1	83.1	83.1	23.129	0	323.31	3733100000	1893	477080000	264750000	470210000	564930000	484310000	784910000	621330000	400410000	421620000	258830000	503550000	338370000	tr|A2RKX6|A2RKX6_LACLMTelAOS=Lactococcuslactissubsp.cremoris(strainMG1363)GN=telAPE=4SV=1	tr|A2RKX6|A2RKX6_LACLMTelAOS=Lactococcuslactissubsp.cremoris(strainMG1363)GN=telAPE=4SV=1
tr|A2RKX7|A2RKX7_LACLM	tr|A2RKX7|A2RKX7_LACLM	21	23	21	23	23	22	22	19	20	19	22	16	26	26	26	67.7	67.7	67.7	40.682	0	323.31	3062300000	1339	569470000	314880000	538320000	304020000	337750000	277860000	372940000	260890000	220990000	387860000	257150000	485200000	tr|A2RKX7|A2RKX7_LACLMORF53OS=Lactococcuslactissubsp.cremoris(strainMG1363)GN=llmg_1353PE=4SV=1	tr|A2RKX7|A2RKX7_LACLMORF53OS=Lactococcuslactissubsp.cremoris(strainMG1363)GN=llmg_1353PE=4SV=1
tr|A2RKX8|A2RKX8_LACLM	tr|A2RKX8|A2RKX8_LACLM	18	16	10	8	6	8	11	13	11	8	8	8	20	20	20	43.3	43.3	43.3	62.373	0	145.58	332980000	184	11131000	10201000	12621000	5748100	7442100	5567700	6441100	5904200	5761500	11311000	8569800	10808000	tr|A2RKX8|A2RKX8_LACLMORF52OS=Lactococcuslactissubsp.cremoris(strainMG1363)GN=llmg_1354PE=4SV=1	tr|A2RKX8|A2RKX8_LACLMORF52OS=Lactococcuslactissubsp.cremoris(strainMG1363)GN=llmg_1354PE=4SV=1
tr|A2RKX9|A2RKX9_LACLM	tr|A2RKX9|A2RKX9_LACLM	7	7	9	8	9	7	8	5	7	8	10	9	12	12	12	50.9	50.9	50.9	30.745	0	160.55	199760000	139	21361000	17252000	11007000	16642000	18204000	33080000	19161000	17283000	19448000	14867000	17097000	12998000	tr|A2RKX9|A2RKX9_LACLMUncharacterizedproteinOS=Lactococcuslactissubsp.cremoris(strainMG1363)GN=llmg_1355PE=4SV=1	tr|A2RKX9|A2RKX9_LACLMUncharacterizedproteinOS=Lactococcuslactissubsp.cremoris(strainMG1363)GN=llmg_1355PE=4SV=1
tr|A2RKY0|A2RKY0_LACLM	tr|A2RKY0|A2RKY0_LACLM	11	14	4	10	9	8	7	9	9	5	9	5	18	18	18	45.7	45.7	45.7	41.907	0	197.56	82666000	156	3883300	10775000	1635000	17093000	10498000	11445000	17399000	11877000	17069000	9854900	13689000	6908500	tr|A2RKY0|A2RKY0_LACLMORF50OS=Lactococcuslactissubsp.cremoris(strainMG1363)GN=llmg_1356PE=4SV=1	tr|A2RKY0|A2RKY0_LACLMORF50OS=Lactococcuslactissubsp.cremoris(strainMG1363)GN=llmg_1356PE=4SV=1
tr|A2RKY1|A2RKY1_LACLM	tr|A2RKY1|A2RKY1_LACLM	10	11	3	8	9	7	7	8	6	6	6	5	16	16	16	41	41	41	45.399	0	103.86	61415000	95	3885000	4873600	2652100	2736200	7729900	5057700	5356000	6280300	7014100	5996100	4693500	5020800	tr|A2RKY1|A2RKY1_LACLMORF49OS=Lactococcuslactissubsp.cremoris(strainMG1363)GN=llmg_1357PE=4SV=1	tr|A2RKY1|A2RKY1_LACLMORF49OS=Lactococcuslactissubsp.cremoris(strainMG1363)GN=llmg_1357PE=4SV=1
tr|A2RKY2|A2RKY2_LACLM	tr|A2RKY2|A2RKY2_LACLM	10	15	9	9	11	8	8	10	8	8	11	8	17	17	17	37	37	37	46.742	0	58.596	123090000	144	10907000	12176000	8280300	9632800	11490000	6345400	6881400	7875100	9985300	9907800	13013000	12601000	tr|A2RKY2|A2RKY2_LACLMORF48OS=Lactococcuslactissubsp.cremoris(strainMG1363)GN=llmg_1358PE=4SV=1	tr|A2RKY2|A2RKY2_LACLMORF48OS=Lactococcuslactissubsp.cremoris(strainMG1363)GN=llmg_1358PE=4SV=1
tr|A2RKY6|A2RKY6_LACLM	tr|A2RKY6|A2RKY6_LACLM	3	1	2	4	2	3	3	5	4	4	4	3	6	6	6	50	50	50	10.547	0	17.946	34783000	69	6330100	0	6935800	5440600	6194000	3862400	3334200	11739000	8563900	5956900	6814400	13063000	tr|A2RKY6|A2RKY6_LACLMORF44OS=Lactococcuslactissubsp.cremoris(strainMG1363)GN=llmg_1362PE=4SV=1	tr|A2RKY6|A2RKY6_LACLMORF44OS=Lactococcuslactissubsp.cremoris(strainMG1363)GN=llmg_1362PE=4SV=1
tr|A2RKY8|A2RKY8_LACLM	tr|A2RKY8|A2RKY8_LACLM	1	2	2	0	1	1	1	2	1	0	0	0	2	2	2	9.9	9.9	9.9	25.009	0	4.1317	4381100	20	0	2278300	1415700	0	0	0	0	410860	0	0	0	0	tr|A2RKY8|A2RKY8_LACLMORF42OS=Lactococcuslactissubsp.cremoris(strainMG1363)GN=llmg_1365PE=4SV=1	tr|A2RKY8|A2RKY8_LACLMORF42OS=Lactococcuslactissubsp.cremoris(strainMG1363)GN=llmg_1365PE=4SV=1
tr|A2RKZ9|A2RKZ9_LACLM	tr|A2RKZ9|A2RKZ9_LACLM	2	4	2	0	1	1	1	1	1	1	1	1	4	4	4	10.2	10.2	10.2	67.722	0	9.5501	56639000	41	1644500	6955600	3703800	0	0	0	0	0	0	0	5777600	3633700	tr|A2RKZ9|A2RKZ9_LACLMORF30OS=Lactococcuslactissubsp.cremoris(strainMG1363)GN=llmg_1377PE=4SV=1	tr|A2RKZ9|A2RKZ9_LACLMORF30OS=Lactococcuslactissubsp.cremoris(strainMG1363)GN=llmg_1377PE=4SV=1
tr|A2RL00|A2RL00_LACLM	tr|A2RL00|A2RL00_LACLM	0	1	1	1	0	1	2	1	1	2	0	0	3	3	3	17	17	17	19.94	0	55.137	3670900	11	0	0	0	0	0	0	1947400	0	0	0	0	0	tr|A2RL00|A2RL00_LACLMORF29OS=Lactococcuslactissubsp.cremoris(strainMG1363)GN=llmg_1378PE=4SV=1	tr|A2RL00|A2RL00_LACLMORF29OS=Lactococcuslactissubsp.cremoris(strainMG1363)GN=llmg_1378PE=4SV=1
tr|A2RL03|A2RL03_LACLM	tr|A2RL03|A2RL03_LACLM	2	1	1	1	2	2	1	0	1	2	2	2	4	4	4	18.4	18.4	18.4	40.07	0	3.081	775680000	13	0	0	0	0	7146600	6470000	0	0	0	0	0	0	tr|A2RL03|A2RL03_LACLMORF26OS=Lactococcuslactissubsp.cremoris(strainMG1363)GN=llmg_1382PE=4SV=1	tr|A2RL03|A2RL03_LACLMORF26OS=Lactococcuslactissubsp.cremoris(strainMG1363)GN=llmg_1382PE=4SV=1
tr|A2RL07|A2RL07_LACLM	tr|A2RL07|A2RL07_LACLM	3	2	3	1	2	2	0	1	0	0	0	0	5	5	5	15.8	15.8	15.8	49.7	0	9.936	28193000	8	587500	637620	864890	0	0	0	0	0	0	0	0	0	tr|A2RL07|A2RL07_LACLMORF22OS=Lactococcuslactissubsp.cremoris(strainMG1363)GN=llmg_1386PE=4SV=1	tr|A2RL07|A2RL07_LACLMORF22OS=Lactococcuslactissubsp.cremoris(strainMG1363)GN=llmg_1386PE=4SV=1
tr|A2RL12|A2RL12_LACLM	tr|A2RL12|A2RL12_LACLM	2	2	3	5	3	3	2	3	5	2	5	4	10	10	10	17.4	17.4	17.4	85.821	0	21.367	11574000	49	0	0	7156700	9332000	5844600	1263700	1397400	8903200	5127300	5124100	6334600	12980000	tr|A2RL12|A2RL12_LACLMORF17OS=Lactococcuslactissubsp.cremoris(strainMG1363)GN=llmg_1391PE=4SV=1	tr|A2RL12|A2RL12_LACLMORF17OS=Lactococcuslactissubsp.cremoris(strainMG1363)GN=llmg_1391PE=4SV=1
tr|A2RL18|A2RL18_LACLM	tr|A2RL18|A2RL18_LACLM	8	8	6	11	7	11	7	6	9	13	6	8	24	24	24	26.4	26.4	26.4	135.12	0	49.708	56210000	93	9656200	6106200	8258100	13537000	6428600	7981300	7459200	18411000	15539000	17216000	20925000	11541000	tr|A2RL18|A2RL18_LACLMCluAOS=Lactococcuslactissubsp.cremoris(strainMG1363)GN=cluAPE=4SV=1	tr|A2RL18|A2RL18_LACLMCluAOS=Lactococcuslactissubsp.cremoris(strainMG1363)GN=cluAPE=4SV=1
tr|A2RL19|A2RL19_LACLM	tr|A2RL19|A2RL19_LACLM	4	4	3	1	1	1	4	3	4	4	3	4	7	6	6	28.5	25.6	25.6	36.927	0	60.663	53548000	80	12084000	6084500	6562700	0	0	0	7065900	5663000	6287100	6969800	6575800	4882200	tr|A2RL19|A2RL19_LACLMORF10OS=Lactococcuslactissubsp.cremoris(strainMG1363)GN=llmg_1399PE=4SV=1	tr|A2RL19|A2RL19_LACLMORF10OS=Lactococcuslactissubsp.cremoris(strainMG1363)GN=llmg_1399PE=4SV=1
tr|A2RL21|A2RL21_LACLM	tr|A2RL21|A2RL21_LACLM	1	1	1	1	1	1	4	4	3	1	3	1	4	4	4	23.3	23.3	23.3	13.93	0	9.1098	3310300	23	0	0	0	0	0	0	1123200	1588400	1833200	0	1720400	0	tr|A2RL21|A2RL21_LACLMORF8OS=Lactococcuslactissubsp.cremoris(strainMG1363)GN=llmg_1402PE=4SV=1	tr|A2RL21|A2RL21_LACLMORF8OS=Lactococcuslactissubsp.cremoris(strainMG1363)GN=llmg_1402PE=4SV=1
tr|A2RL26|A2RL26_LACLM	tr|A2RL26|A2RL26_LACLM	3	4	0	0	1	1	0	0	0	2	2	3	5	5	5	24.6	24.6	24.6	33.325	0	7.0812	14056000	11	4660800	1282700	0	0	0	0	0	0	0	5215400	4025600	6607500	tr|A2RL26|A2RL26_LACLMUncharacterizedproteinOS=Lactococcuslactissubsp.cremoris(strainMG1363)GN=llmg_1409PE=4SV=1	tr|A2RL26|A2RL26_LACLMUncharacterizedproteinOS=Lactococcuslactissubsp.cremoris(strainMG1363)GN=llmg_1409PE=4SV=1
tr|A2RL28|A2RL28_LACLM	tr|A2RL28|A2RL28_LACLM	2	1	1	1	0	0	0	0	0	0	0	0	3	3	3	9.9	9.9	9.9	36.779	0	5.9875	8057100	4	0	144930	0	0	0	0	0	0	0	0	0	0	tr|A2RL28|A2RL28_LACLMORF1OS=Lactococcuslactissubsp.cremoris(strainMG1363)GN=llmg_1411PE=4SV=1	tr|A2RL28|A2RL28_LACLMORF1OS=Lactococcuslactissubsp.cremoris(strainMG1363)GN=llmg_1411PE=4SV=1
tr|A2RL31|A2RL31_LACLM	tr|A2RL31|A2RL31_LACLM	10	8	14	11	10	11	13	12	9	10	9	9	16	16	16	72.8	72.8	72.8	28.221	0	153.26	553890000	431	59495000	71515000	79205000	59321000	53712000	67853000	70171000	51926000	53413000	63211000	53382000	50501000	tr|A2RL31|A2RL31_LACLMNagDproteinOS=Lactococcuslactissubsp.cremoris(strainMG1363)GN=nagDPE=4SV=1	tr|A2RL31|A2RL31_LACLMNagDproteinOS=Lactococcuslactissubsp.cremoris(strainMG1363)GN=nagDPE=4SV=1
tr|A2RL32|A2RL32_LACLM	tr|A2RL32|A2RL32_LACLM	11	6	9	3	2	8	10	9	7	8	3	7	16	16	16	58.8	58.8	58.8	29.025	0	120.82	241240000	349	22324000	21008000	30339000	18379000	10577000	21195000	24318000	25785000	20217000	7930200	11881000	13766000	tr|A2RL32|A2RL32_LACLMUncharacterizedproteinOS=Lactococcuslactissubsp.cremoris(strainMG1363)GN=llmg_1415PE=4SV=1	tr|A2RL32|A2RL32_LACLMUncharacterizedproteinOS=Lactococcuslactissubsp.cremoris(strainMG1363)GN=llmg_1415PE=4SV=1
tr|A2RL33|A2RL33_LACLM	tr|A2RL33|A2RL33_LACLM	1	2	1	1	1	2	3	3	2	1	2	1	4	4	4	24	24	24	15.871	0.0027119	1.9283	15682000	32	0	0	0	0	0	5672900	3642700	7069300	7464400	0	8568000	0	tr|A2RL33|A2RL33_LACLMUncharacterizedproteinOS=Lactococcuslactissubsp.cremoris(strainMG1363)GN=llmg_1416PE=4SV=1	tr|A2RL33|A2RL33_LACLMUncharacterizedproteinOS=Lactococcuslactissubsp.cremoris(strainMG1363)GN=llmg_1416PE=4SV=1
tr|A2RL34|A2RL34_LACLM	tr|A2RL34|A2RL34_LACLM	2	1	2	2	1	1	2	2	1	2	1	2	3	3	3	13.3	13.3	13.3	30.905	0	78.494	118590000	36	9430900	0	22556000	0	0	0	3874900	9242400	0	2268500	0	2423400	tr|A2RL34|A2RL34_LACLMUncharacterizedproteinOS=Lactococcuslactissubsp.cremoris(strainMG1363)GN=llmg_1417PE=4SV=1	tr|A2RL34|A2RL34_LACLMUncharacterizedproteinOS=Lactococcuslactissubsp.cremoris(strainMG1363)GN=llmg_1417PE=4SV=1
tr|A2RL35|A2RL35_LACLM	tr|A2RL35|A2RL35_LACLM	1	3	2	1	1	1	1	3	1	1	4	2	7	7	7	23.2	23.2	23.2	43.5	0	117.26	13021000	17	0	1633700	3528700	0	0	0	0	1291500	2124700	0	3257400	0	tr|A2RL35|A2RL35_LACLMHemNproteinOS=Lactococcuslactissubsp.cremoris(strainMG1363)GN=hemNPE=4SV=1	tr|A2RL35|A2RL35_LACLMHemNproteinOS=Lactococcuslactissubsp.cremoris(strainMG1363)GN=hemNPE=4SV=1
tr|A2RL36|A2RL36_LACLM	tr|A2RL36|A2RL36_LACLM	4	5	3	1	1	0	2	2	3	1	0	2	5	5	5	26.9	26.9	26.9	20.294	0	12.549	8825900	27	2287100	2692200	2017900	0	0	0	899910	1248600	1593600	0	0	1095400	tr|A2RL36|A2RL36_LACLMUncharacterizedproteinOS=Lactococcuslactissubsp.cremoris(strainMG1363)GN=llmg_1419PE=4SV=1	tr|A2RL36|A2RL36_LACLMUncharacterizedproteinOS=Lactococcuslactissubsp.cremoris(strainMG1363)GN=llmg_1419PE=4SV=1
tr|A2RL41|A2RL41_LACLM	tr|A2RL41|A2RL41_LACLM	3	3	4	2	3	2	4	4	3	3	3	5	7	7	7	36.7	36.7	36.7	31.929	0	100.86	16537000	38	2720900	1994600	1869900	1097100	1222600	2127100	1568000	1764400	2243500	1609900	1428300	1727300	tr|A2RL41|A2RL41_LACLMUncharacterizedproteinOS=Lactococcuslactissubsp.cremoris(strainMG1363)GN=llmg_1425PE=4SV=1	tr|A2RL41|A2RL41_LACLMUncharacterizedproteinOS=Lactococcuslactissubsp.cremoris(strainMG1363)GN=llmg_1425PE=4SV=1
tr|A2RL42|A2RL42_LACLM	tr|A2RL42|A2RL42_LACLM	6	7	8	4	5	3	2	2	1	3	2	2	12	12	12	24.2	24.2	24.2	68.237	0	177.92	84702000	56	1634900	2206100	2662900	1117400	880500	1591800	884380	0	0	1103000	573560	1368000	tr|A2RL42|A2RL42_LACLMUncharacterizedproteinOS=Lactococcuslactissubsp.cremoris(strainMG1363)GN=llmg_1426PE=4SV=1	tr|A2RL42|A2RL42_LACLMUncharacterizedproteinOS=Lactococcuslactissubsp.cremoris(strainMG1363)GN=llmg_1426PE=4SV=1
tr|A2RL45|A2RL45_LACLM	tr|A2RL45|A2RL45_LACLM	7	8	7	9	8	8	7	8	9	5	6	4	12	12	12	63.2	63.2	63.2	35.047	0	162.79	174600000	210	6139000	10081000	17525000	17387000	23645000	35625000	25559000	21602000	19838000	25005000	16167000	17631000	tr|A2RL45|A2RL45_LACLML-lactatedehydrogenaseOS=Lactococcuslactissubsp.cremoris(strainMG1363)GN=ldhXPE=3SV=1	tr|A2RL45|A2RL45_LACLML-lactatedehydrogenaseOS=Lactococcuslactissubsp.cremoris(strainMG1363)GN=ldhXPE=3SV=1
tr|A2RL46|A2RL46_LACLM	tr|A2RL46|A2RL46_LACLM	9	13	4	5	7	9	8	7	9	6	7	10	15	15	15	59.7	59.7	59.7	34.08	0	180.38	144520000	266	10827000	15221000	15236000	6201200	19610000	35128000	15697000	16107000	17877000	21262000	20949000	24901000	tr|A2RL46|A2RL46_LACLMRiboflavinbiosynthesisproteinOS=Lactococcuslactissubsp.cremoris(strainMG1363)GN=ribCPE=3SV=1	tr|A2RL46|A2RL46_LACLMRiboflavinbiosynthesisproteinOS=Lactococcuslactissubsp.cremoris(strainMG1363)GN=ribCPE=3SV=1
tr|A2RL48|A2RL48_LACLM	tr|A2RL48|A2RL48_LACLM	4	6	5	3	3	3	4	4	4	4	4	4	6	6	6	36.4	36.4	36.4	25.249	0	134.24	137360000	127	5511600	11186000	12439000	22230000	14499000	4830500	9062600	17282000	17461000	18773000	17132000	11987000	tr|A2RL48|A2RL48_LACLMUncharacterizedproteinOS=Lactococcuslactissubsp.cremoris(strainMG1363)GN=llmg_1432PE=4SV=1	tr|A2RL48|A2RL48_LACLMUncharacterizedproteinOS=Lactococcuslactissubsp.cremoris(strainMG1363)GN=llmg_1432PE=4SV=1
tr|A2RL55|A2RL55_LACLM	tr|A2RL55|A2RL55_LACLM	31	33	30	26	23	23	23	27	25	20	23	26	39	39	39	73.7	73.7	73.7	52.933	0	323.31	5896800000	1090	200310000	202880000	205080000	84091000	160180000	84405000	76996000	122090000	130590000	215700000	181940000	286620000	tr|A2RL55|A2RL55_LACLMFrdCproteinOS=Lactococcuslactissubsp.cremoris(strainMG1363)GN=frdCPE=4SV=1	tr|A2RL55|A2RL55_LACLMFrdCproteinOS=Lactococcuslactissubsp.cremoris(strainMG1363)GN=frdCPE=4SV=1
tr|A2RL56|A2RL56_LACLM	tr|A2RL56|A2RL56_LACLM	5	4	3	2	2	2	3	4	4	2	3	2	8	8	8	51.7	51.7	51.7	16.702	0	29.037	50253000	64	8112600	4413300	4089700	10986000	13886000	7048200	5373200	4112300	6356700	8057100	9417700	15335000	tr|A2RL56|A2RL56_LACLMUncharacterizedproteinOS=Lactococcuslactissubsp.cremoris(strainMG1363)GN=llmg_1442PE=4SV=1	tr|A2RL56|A2RL56_LACLMUncharacterizedproteinOS=Lactococcuslactissubsp.cremoris(strainMG1363)GN=llmg_1442PE=4SV=1
tr|A2RL57|A2RL57_LACLM	tr|A2RL57|A2RL57_LACLM	0	0	0	1	0	0	0	1	3	1	1	1	3	3	3	31.6	31.6	31.6	18.068	0	3.3031	2852100	9	0	0	0	0	0	0	0	0	12943000	0	0	0	tr|A2RL57|A2RL57_LACLMMutXproteinOS=Lactococcuslactissubsp.cremoris(strainMG1363)GN=mutXPE=4SV=1	tr|A2RL57|A2RL57_LACLMMutXproteinOS=Lactococcuslactissubsp.cremoris(strainMG1363)GN=mutXPE=4SV=1
tr|A2RL58|A2RL58_LACLM	tr|A2RL58|A2RL58_LACLM	40	40	34	40	26	28	34	31	25	22	29	19	52	52	52	73	73	73	86.084	0	323.31	4053500000	774	109150000	88778000	91496000	138260000	60009000	66515000	55284000	49961000	57450000	77335000	55117000	45486000	tr|A2RL58|A2RL58_LACLMDNAhelicaseOS=Lactococcuslactissubsp.cremoris(strainMG1363)GN=pcrAPE=4SV=1	tr|A2RL58|A2RL58_LACLMDNAhelicaseOS=Lactococcuslactissubsp.cremoris(strainMG1363)GN=pcrAPE=4SV=1
tr|A2RL61|A2RL61_LACLM	tr|A2RL61|A2RL61_LACLM	9	11	9	2	10	16	9	16	10	11	12	17	24	24	24	28.5	28.5	28.5	103.71	0	201.73	85378000	308	10306000	8787300	7362000	469460	9354600	30384000	7490200	24383000	8709900	8999200	10435000	20627000	tr|A2RL61|A2RL61_LACLMUncharacterizedproteinOS=Lactococcuslactissubsp.cremoris(strainMG1363)GN=llmg_1448PE=4SV=1	tr|A2RL61|A2RL61_LACLMUncharacterizedproteinOS=Lactococcuslactissubsp.cremoris(strainMG1363)GN=llmg_1448PE=4SV=1
tr|A2RL62|A2RL62_LACLM	tr|A2RL62|A2RL62_LACLM	5	5	5	4	3	3	2	4	3	4	5	6	8	8	8	32.8	32.8	32.8	28.074	0	46.03	34099000	76	5767700	3053900	869900	5387100	2714900	3853300	2795300	2653200	3228300	3965800	3152400	5196800	tr|A2RL62|A2RL62_LACLMSrtAproteinOS=Lactococcuslactissubsp.cremoris(strainMG1363)GN=srtAPE=4SV=1	tr|A2RL62|A2RL62_LACLMSrtAproteinOS=Lactococcuslactissubsp.cremoris(strainMG1363)GN=srtAPE=4SV=1
[truncated: 523 more rows]

## Sheet: Table S4
Table S4. Log-2 transformed label-free quantification (LFQ) intensities for L. lactis MG1363 proteins detected in this study.
[truncated: 1,325 more rows]

## Sheet: Table S5
Table S5. L. lactis MG1363 proteins detected strictly during infection by both phage p2 and phage p2∆47
[truncated: 84 more rows]

[truncated: 3 more sheets: Table S6, Table S7, Table S8]
